# Supplementary material
Source: PubMed Central journal article supplement (PMC7196637)
Supplement: supp_RA119.011049_155803_2_supp_492008_q7353p.pdf [file supp_RA119.011049_155803_2_supp_492008_q7353p.pdf]

## **SUPPORTING INFORMATION**

DHHC7-mediated palmitoylation of barttin is critically involved in regulation of the ClC-K chloride channel functions

**Nataliya Gorinski, Daniel Wojciechowski, Daria Guseva, Dalia Abdel Galil, Franziska Mueller, Alexander Wirth, Stefan Thiemann, Andre Zeug, Silke Schmidt, Monika Zareba-Koziol, Jakub Wlodarczyk, Boris V. Skryabin, Silke Glage, Martin Fischer, Samer Al-Samir, Nicole Kerkenberg, Christa Hohoff, Weiqi Zhang, Volker Endeward and Evgeni Ponimaskin**

### **Table of Contents**

Figure S1

Figure S2

Figure S3

Figure S4

Figure S5

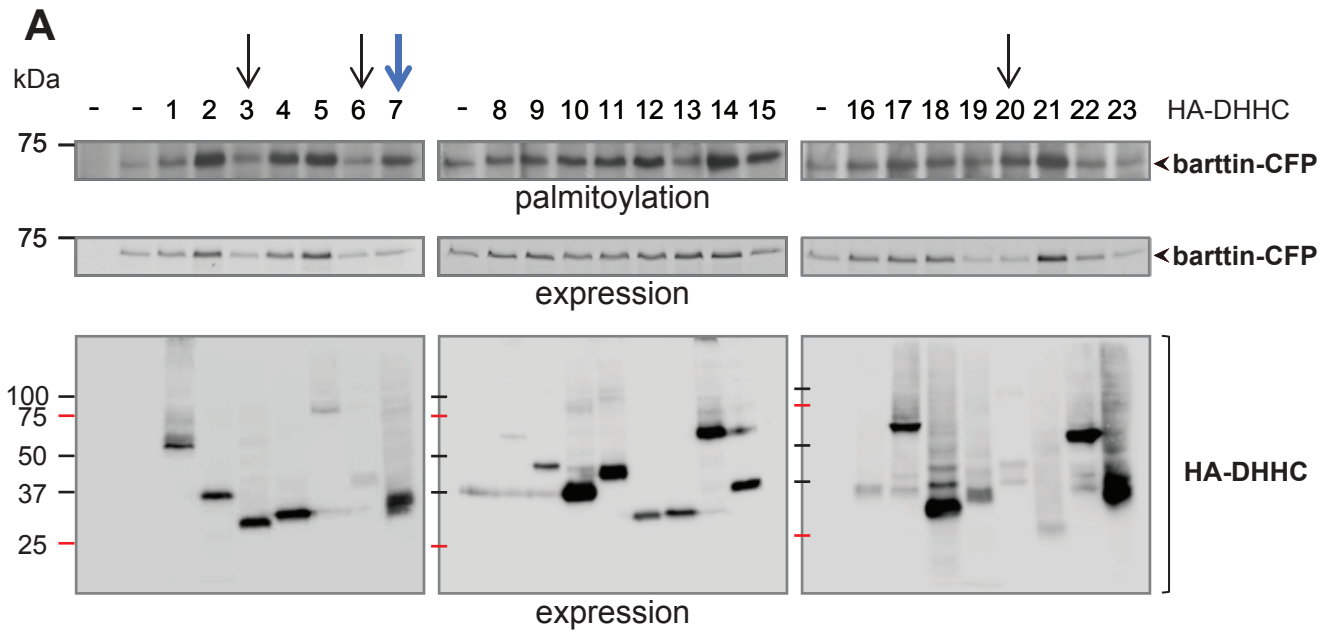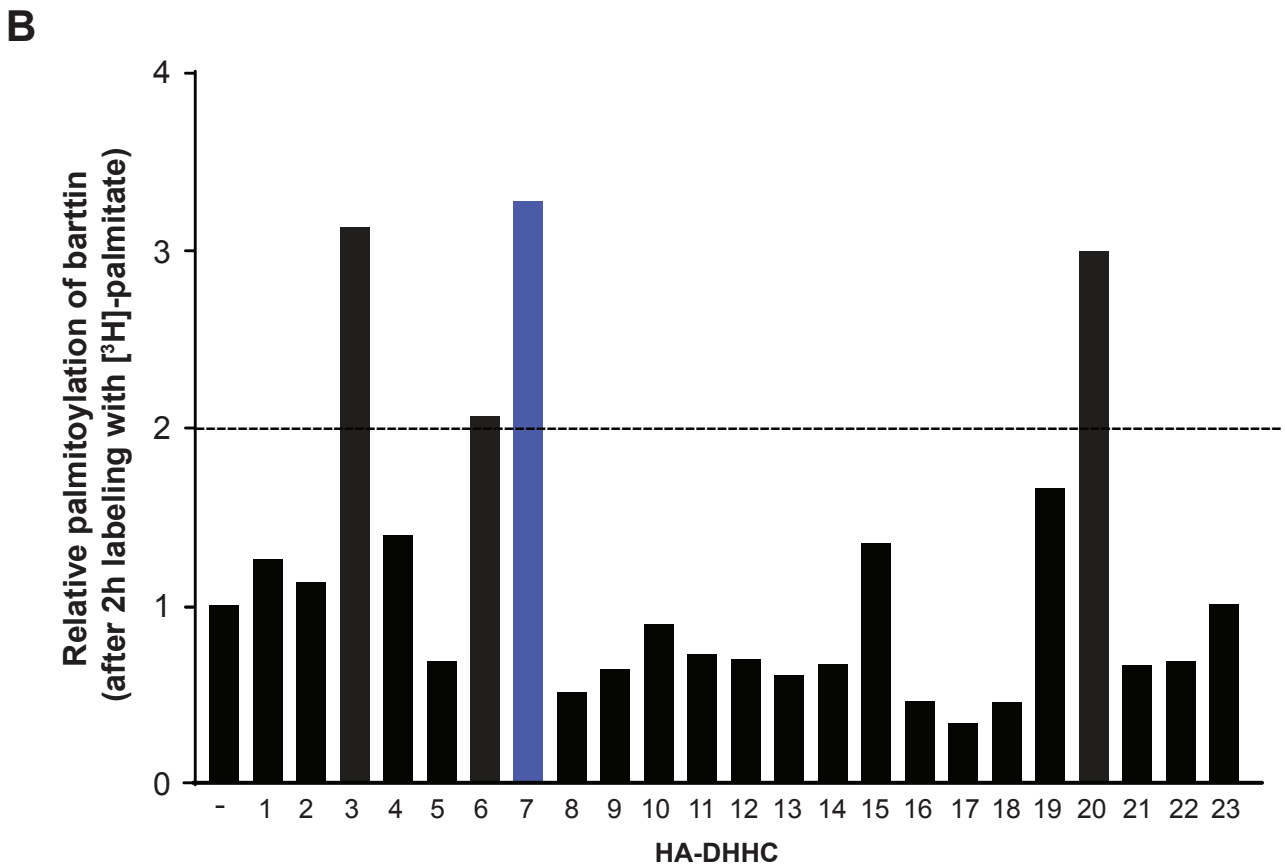

**Figure S1:**

**(A)**  $[^3\text{H}]$ -palmitate incorporation into barttin-CFP after labelling with  $[9,10(n)^3\text{H}]$  palmitic acid for 2 h at  $37^\circ\text{C}$  in HEK293T cells co-transfected with barttin and corresponding DHHCs. **(B)** Relative changes in barttin palmitoylation levels.

**A**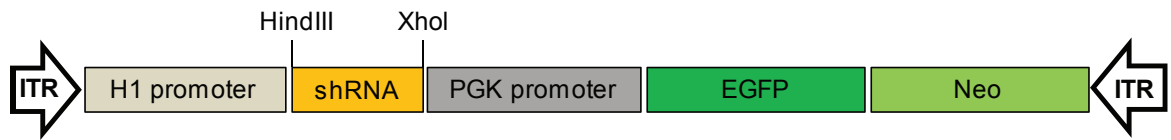**B**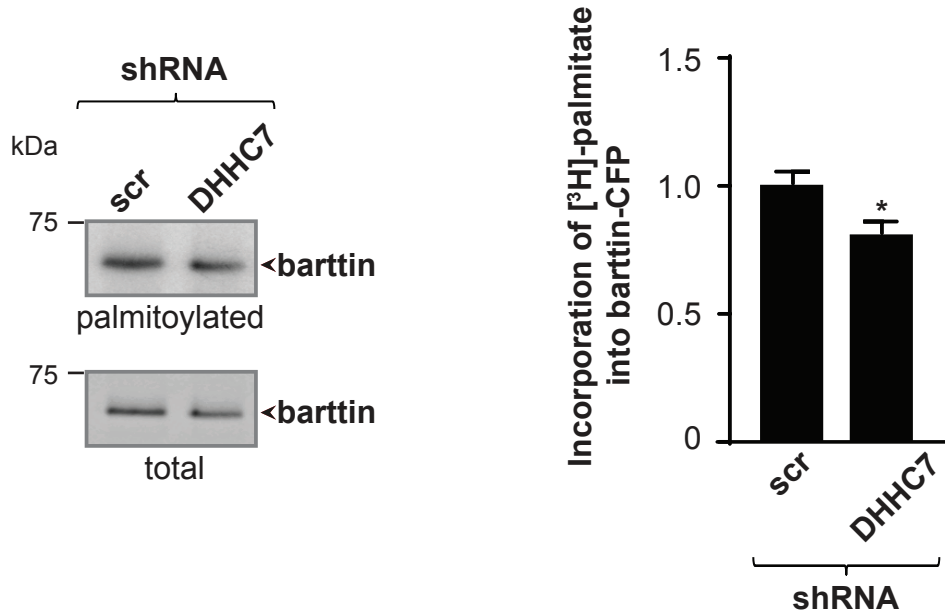**Figure S2:**

**(A)** Schematic presentation of construct encoding for shRNA against DHHC7 together with the green fluorescent protein. **(B)** Autoradiographic analysis of barttin palmitoylation and expression in HEK293T cells labelled with [9,10(n)<sup>3</sup>H] palmitic acid after knockdown of endogenous DHHC7 by shRNA (left panels). Quantification is shown on the right. \*,  $P < 0.05$ . Student's  $t$ -test. All data are shown as mean + S.D.

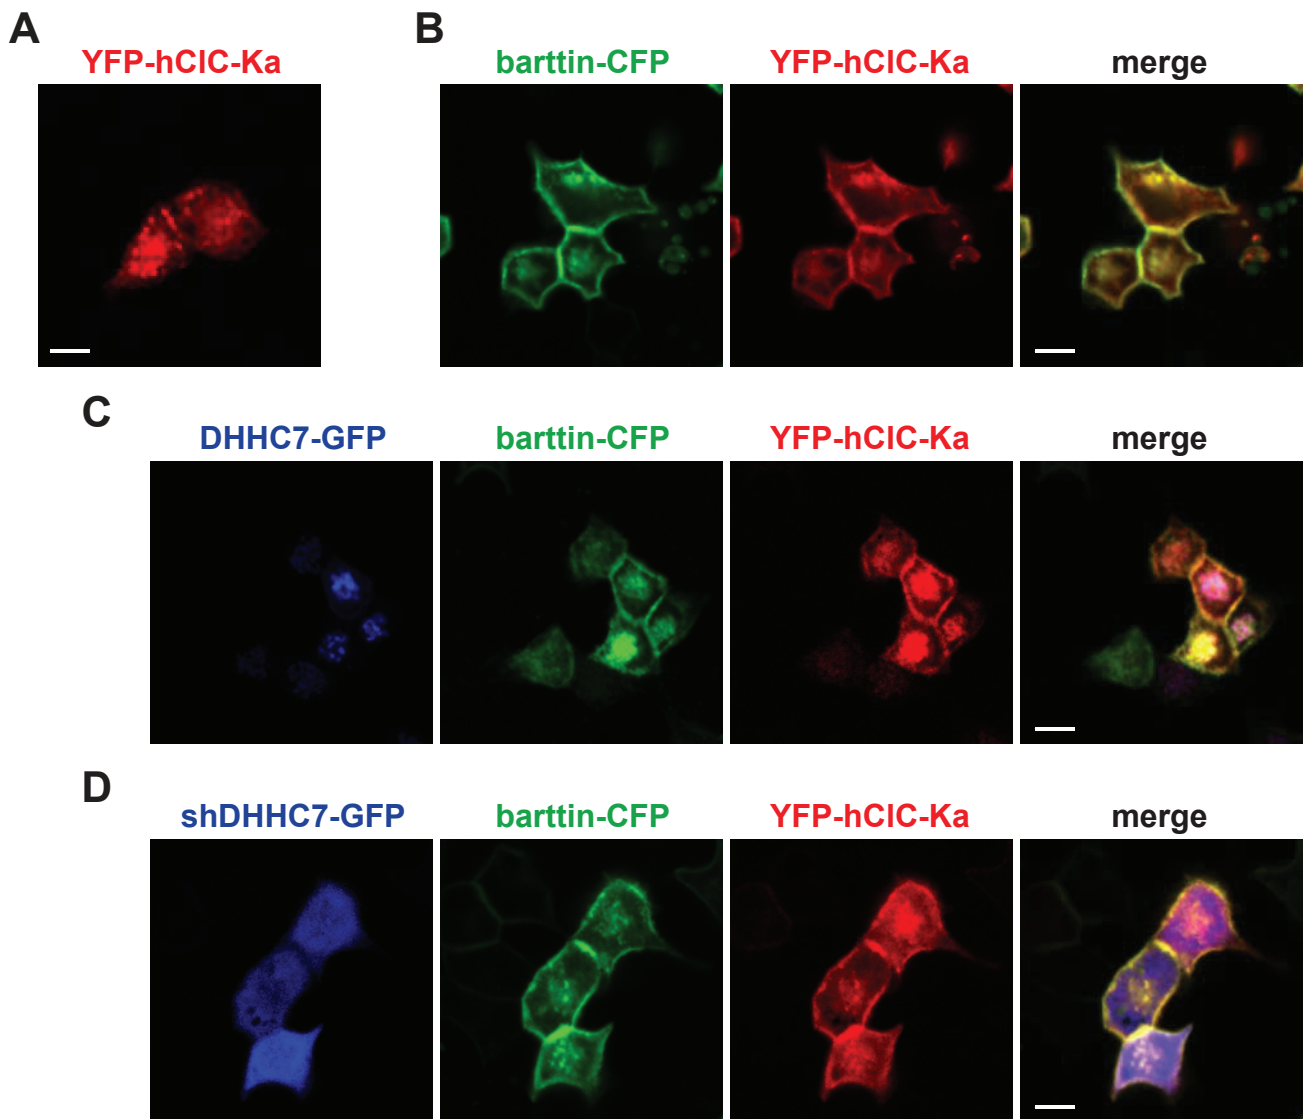

**Figure S3:**

(A, B) Representative confocal images of MDCK II cells expressing YFP-hCIC-Ka alone (red) (A) or together with barttin-CFP (green) (B). (C, D) Distribution of YFP-hCIC-Ka (red) and barttin-CFP (green) in MDCK II cells after co-expression with DHHC7-GFP (blue) (C), or with bi-cistronic plasmid encoding shRNA against DHHC7 and eGFP (blue) (D). Scale bars represent 10 μm.

**A**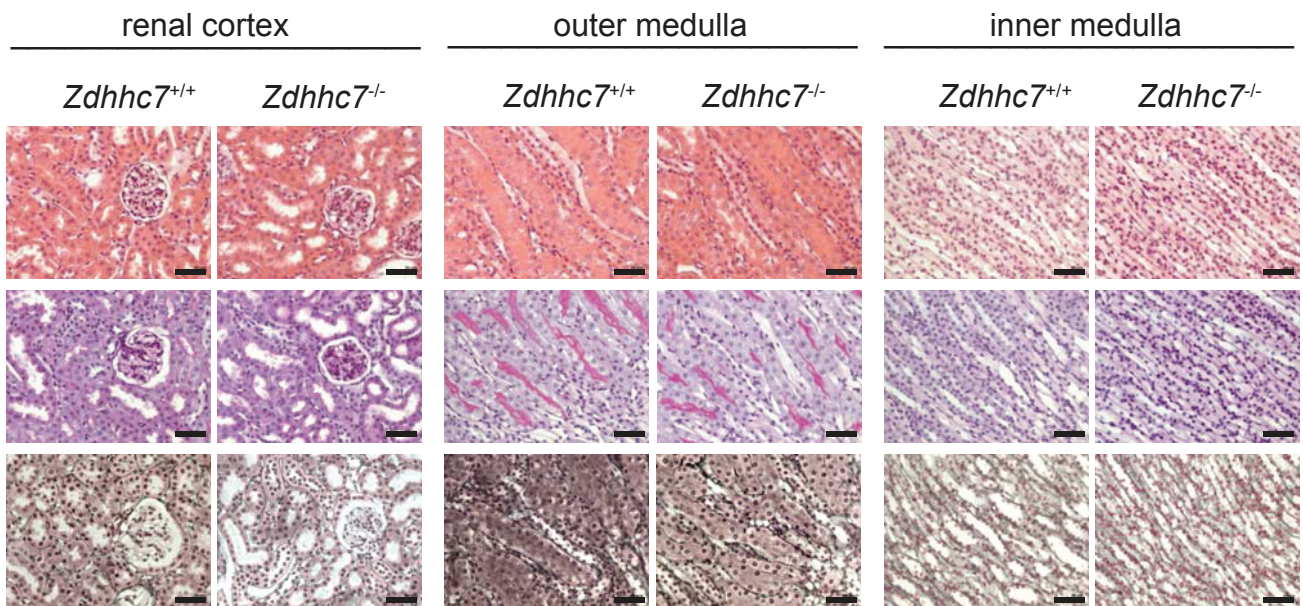**B**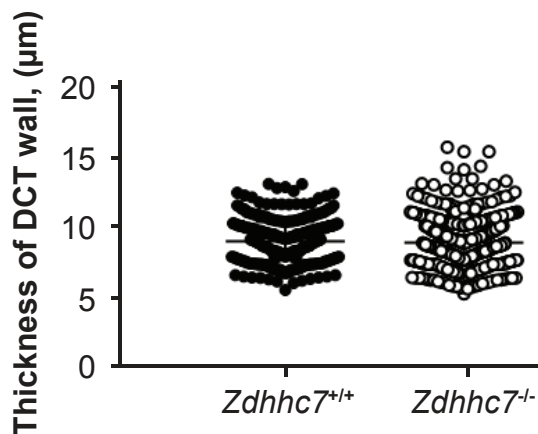**Figure S4:**

**(A)** Histological comparison of different segments of nephrons from P90 male *Zdhhc7*<sup>+/+</sup> animals and *Zdhhc7*<sup>-/-</sup> littermates ( $n = 3$ ). Histological sections were stained with H&E, PAS and silver (Jones Stain). Scale bars indicate 50  $\mu\text{m}$ . **(B)** Quantification of tubule wall thickness from distal tubule in renal cortex from *Zdhhc7*<sup>+/+</sup> ( $n_{\text{ROI}} = 436$ ) and *Zdhhc7*<sup>-/-</sup> mice ( $n_{\text{ROI}} = 618$ ) is shown as dot plots. Student's *t*-test. All data are shown as mean  $\pm$  S.D.

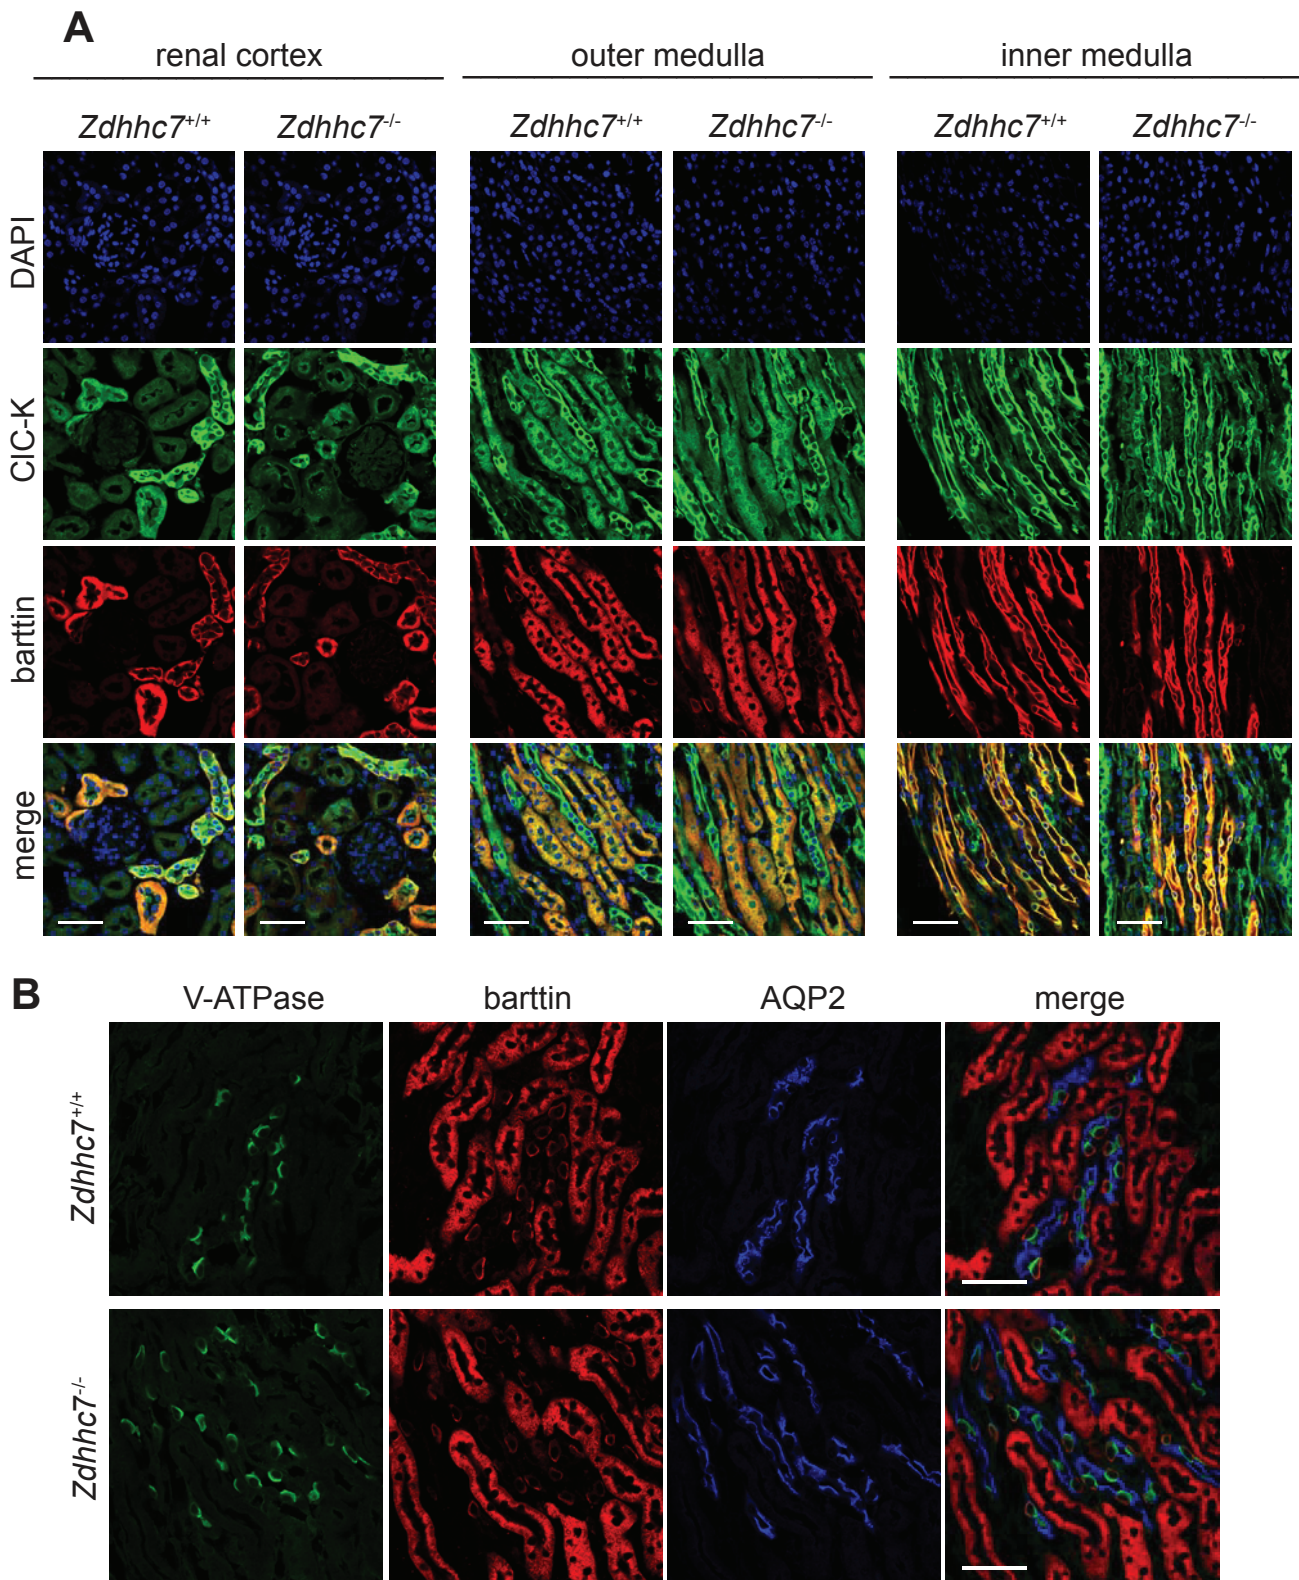

**Figure S5:**

**(A)** Representative images demonstrating distribution of CIC-K (green) and barttin (red)

in renal cortex, outer medulla and inner medulla of WT and *Zdhhc7*<sup>-/-</sup> mice (P90, males, littermates). DAPI staining (blue) visualizes nuclei. Scale bars represent 50  $\mu$ m. **(B)** Distribution of barttin (red) in  $\alpha$ -intercalated cells of collecting duct in *Zdhhc7*<sup>+/+</sup> and *Zdhhc7*<sup>-/-</sup> mice (P90, male, littermates). Aquaporin-2 (AQP2, blue) identifies principal cells of collecting duct, and V-ATPase (green) on apical side identifies  $\alpha$ -intercalated cells. Scale bars represent 50  $\mu$ m.
