# Supplementary material
Source: PubMed Central journal article supplement (PMC7196637)
Supplement: supp_RA119.011049_155803_2_supp_492022_q7354t.pdf [file supp_RA119.011049_155803_2_supp_492022_q7354t.pdf]

**Supplemental Table 1 Semiquantitative analysis based on spectral counts of palmitoylated proteins in WT and DHHC7ko mice kidneys.**

| SPROT accession number | PROTEIN NAME                                                                                               | p-value | FOLD CHANGE |
|------------------------|------------------------------------------------------------------------------------------------------------|---------|-------------|
| A2ARV4                 | Low-density lipoprotein receptor-related protein 2                                                         | 0,0011  | 0,71        |
| Q60928                 | Gamma-glutamyltranspeptidase 1                                                                             | 0,0012  | 2,77        |
| P53395                 | Lipoamide acyltransferase component of branched-chain alpha-keto acid dehydrogenase complex, mitochondrial | 0,0068  | 2,23        |
| P25444                 | 40S ribosomal protein S2                                                                                   | 0,0114  | 1,08        |
| P62242                 | 40S ribosomal protein S8                                                                                   | 0,0133  | 1,14        |
| Q8VIM4                 | Barttin                                                                                                    | 0,0150  | 0,68        |
| O09174                 | Alpha-methylacyl-CoA racemase                                                                              | 0,0163  | 2,64        |
| Q91Y97                 | Fructose-bisphosphate aldolase B                                                                           | 0,0196  | 0,81        |
| Q8VDD5                 | Myosin-9                                                                                                   | 0,0207  | 2,93        |
| P07759                 | Serine protease inhibitor A3K                                                                              | 0,0218  | 1,86        |
| P18760                 | Cofilin-1                                                                                                  | 0,0293  | 2,56        |
| P07724                 | Serum albumin                                                                                              | 0,0299  | 1,29        |
| P62317                 | Small nuclear ribonucleoprotein Sm D2                                                                      | 0,0314  | 1,83        |
| Q9WUB7                 | Chloride channel protein ClC-Ka                                                                            | 0,0352  | 2,94        |
| Q91WR5                 | Aldo-keto reductase family 1 member C21                                                                    | 0,0368  | 2,46        |
| Q9DCY0                 | Glycine N-acyltransferase-like protein Keg1                                                                | 0,0379  | 1,12        |
| P63260                 | Actin, cytoplasmic 2                                                                                       | 0,0393  | 1,71        |
| Q8BY89                 | Choline transporter-like protein 2                                                                         | 0,0481  | 0,87        |
| P54071                 | Isocitrate dehydrogenase [NADP], mitochondrial                                                             | 0,0599  | 1,60        |
| P11499                 | Heat shock protein HSP 90-beta                                                                             | 0,0609  | 2,81        |
| P24270                 | Catalase                                                                                                   | 0,0635  | 1,39        |
| P30275                 | Creatine kinase U-type, mitochondrial                                                                      | 0,0637  | 0,84        |
| Q60866                 | Phosphotriesterase-related protein                                                                         | 0,0639  | 1,12        |
| Q99KI0                 | Aconitate hydratase, mitochondrial                                                                         | 0,0661  | 0,98        |
| Q91ZA3                 | Propionyl-CoA carboxylase alpha chain, mitochondrial                                                       | 0,0668  | 1,69        |
| P97449                 | Aminopeptidase N                                                                                           | 0,0681  | 2,05        |
| Q9CPR4                 | 60S ribosomal protein L17                                                                                  | 0,0778  | 2,08        |
| Q8K4Z3                 | NAD(P)H-hydrate epimerase                                                                                  | 0,0792  | 1,66        |
| P68254                 | 14-3-3 protein theta                                                                                       | 0,0798  | 1,67        |
| Q8CIB5                 | Fermitin family homolog 2                                                                                  | 0,0820  | 2,12        |
| P28825                 | Meprin A subunit alpha                                                                                     | 0,0834  | 1,61        |
| P62281                 | 40S ribosomal protein S11                                                                                  | 0,0856  | 1,59        |
| P40142                 | Transketolase                                                                                              | 0,0868  | 0,34        |
| Q8R2N1                 | Aquaporin-3                                                                                                | 0,0908  | 1,31        |
| Q91YT0                 | NADH dehydrogenase [ubiquinone] flavoprotein 1, mitochondrial                                              | 0,0983  | 2,00        |
| O55125                 | Protein NipSnap homolog 1                                                                                  | 0,1083  | 1,91        |
| Q9Z0S1                 | 3'(2'),5'-bisphosphate nucleotidase 1                                                                      | 0,1121  | 0,94        |
| Q91XE4                 | N-acyl-aromatic-L-amino acid amidohydrolase (carboxylate-forming)                                          | 0,1125  | 1,39        |
| O88338                 | Cadherin-16                                                                                                | 0,1152  | 2,15        |
| P60710                 | Actin, cytoplasmic 1                                                                                       | 0,1189  | 1,16        |
| Q05920                 | Pyruvate carboxylase, mitochondrial                                                                        | 0,1214  | 0,43        |
| Q8K2B3                 | Succinate dehydrogenase [ubiquinone] flavoprotein subunit, mitochondrial                                   | 0,1241  | 2,52        |
| Q9DOM5                 | Dynein light chain 2, cytoplasmic                                                                          | 0,1250  | 2,73        |
| B5X0G2                 | Major urinary protein 17                                                                                   | 0,1312  | 1,71        |
| P02762                 | Major urinary protein 6                                                                                    | 0,1312  | 1,71        |
| P04939                 | Major urinary protein 3                                                                                    | 0,1312  | 1,71        |
| P11589                 | Major urinary protein 2                                                                                    | 0,1312  | 1,71        |
| Q9EQF5                 | Dihydropyrimidinase                                                                                        | 0,1350  | 2,45        |
| P10649                 | Glutathione S-transferase Mu 1                                                                             | 0,1371  | 1,77        |
| Q9CQ62                 | 2,4-dienoyl-CoA reductase, mitochondrial                                                                   | 0,1383  | 1,26        |
| P52196                 | Thiosulfate sulfurtransferase                                                                              | 0,1472  | 1,78        |
| Q9WV54                 | Acid ceramidase                                                                                            | 0,1484  | 0,68        |
| P61922                 | 4-aminobutyrate aminotransferase, mitochondrial                                                            | 0,1540  | 0,66        |
| P12970                 | 60S ribosomal protein L7a                                                                                  | 0,1573  | 1,19        |
| P47964                 | 60S ribosomal protein L36                                                                                  | 0,1623  | 1,11        |
| Q9DBM2                 | Peroxisomal bifunctional enzyme                                                                            | 0,1632  | 0,47        |
| Q9DCS2                 | UPF0585 protein C16orf13 homolog                                                                           | 0,1648  | 0,61        |
| Q8VE95                 | UPF0598 protein C8orf82 homolog                                                                            | 0,1719  | 1,63        |
| P47740                 | Fatty aldehyde dehydrogenase                                                                               | 0,1723  | 1,51        |
| Q02013                 | Aquaporin-1                                                                                                | 0,1729  | 1,63        |
| Q6P1B1                 | Xaa-Pro aminopeptidase 1                                                                                   | 0,1738  | 1,80        |
| P57780                 | Alpha-actinin-4                                                                                            | 0,1750  | 1,13        |
| P11930                 | Nucleoside diphosphate-linked moiety X motif 19                                                            | 0,1761  | 1,82        |

|        |                                                                      |        |      |
|--------|----------------------------------------------------------------------|--------|------|
| P55096 | ATP-binding cassette sub-family D member 3                           | 0,1783 | 1,59 |
| P49312 | Heterogeneous nuclear ribonucleoprotein A1                           | 0,1797 | 2,57 |
| Q8VC30 | Triokinase/FMN cyclase                                               | 0,1873 | 1,21 |
| Q8BH61 | Coagulation factor XIII A chain                                      | 0,1882 | 0,99 |
| P19536 | Cytochrome c oxidase subunit 5B, mitochondrial                       | 0,2002 | 2,12 |
| P56382 | ATP synthase subunit epsilon, mitochondrial                          | 0,2058 | 1,81 |
| P63158 | High mobility group protein B1                                       | 0,2091 | 1,47 |
| Q6NSQ9 | Glucose-6-phosphatase 3                                              | 0,2112 | 0,51 |
| Q92111 | Serotransferrin                                                      | 0,2152 | 0,73 |
| Q8BGC4 | Zinc-binding alcohol dehydrogenase domain-containing protein 2       | 0,2183 | 1,58 |
| Q80XN0 | D-beta-hydroxybutyrate dehydrogenase, mitochondrial                  | 0,2189 | 0,97 |
| Q9QUM9 | Proteasome subunit alpha type-6                                      | 0,2259 | 1,00 |
| P62274 | 40S ribosomal protein S29                                            | 0,2325 | 1,91 |
| Q9JII6 | Alcohol dehydrogenase [NADP(+)]                                      | 0,2329 | 0,61 |
| Q9JHU4 | Cytoplasmic dynein 1 heavy chain 1                                   | 0,2340 | 1,24 |
| Q8R3L5 | Solute carrier organic anion transporter family member 3A1           | 0,2340 | 1,31 |
| Q8K0L3 | Acyl-coenzyme A synthetase ACSM2, mitochondrial                      | 0,2371 | 0,30 |
| Q99MN9 | Propionyl-CoA carboxylase beta chain, mitochondrial                  | 0,2395 | 0,88 |
| P45952 | Medium-chain specific acyl-CoA dehydrogenase, mitochondrial          | 0,2430 | 0,46 |
| Q9ESE1 | Lipopolysaccharide-responsive and beige-like anchor protein          | 0,2486 | 2,36 |
| Q60692 | Proteasome subunit beta type-6                                       | 0,2586 | 1,58 |
| P30999 | Catenin delta-1                                                      | 0,2589 | 0,52 |
| Q6PB66 | Leucine-rich PPR motif-containing protein, mitochondrial             | 0,2700 | 1,32 |
| Q922B1 | O-acetyl-ADP-ribose deacetylase MACROD1                              | 0,2701 | 1,32 |
| Q9R1P0 | Proteasome subunit alpha type-4                                      | 0,2703 | 1,32 |
| Q01768 | Nucleoside diphosphate kinase B                                      | 0,2721 | 0,33 |
| P51174 | Long-chain specific acyl-CoA dehydrogenase, mitochondrial            | 0,2761 | 0,49 |
| Q99LB7 | Sarcosine dehydrogenase, mitochondrial                               | 0,2826 | 0,65 |
| P63323 | 40S ribosomal protein S12                                            | 0,2886 | 1,88 |
| P16858 | Glyceraldehyde-3-phosphate dehydrogenase                             | 0,2999 | 0,97 |
| Q8VCR7 | Protein ABHD14B                                                      | 0,3003 | 0,89 |
| Q922D8 | C-1-tetrahydrofolate synthase, cytoplasmic                           | 0,3030 | 0,78 |
| P97351 | 40S ribosomal protein S3a                                            | 0,3149 | 0,69 |
| Q02053 | Ubiquitin-like modifier-activating enzyme 1                          | 0,3176 | 1,06 |
| Q99K67 | Alpha-aminoadipic semialdehyde synthase, mitochondrial               | 0,3229 | 0,62 |
| Q99LC5 | Electron transfer flavoprotein subunit alpha, mitochondrial          | 0,3242 | 0,60 |
| Q9D854 | Oligoribonuclease, mitochondrial                                     | 0,3265 | 1,64 |
| P26041 | Moesin                                                               | 0,3267 | 1,66 |
| P10126 | Elongation factor 1-alpha 1                                          | 0,3353 | 0,87 |
| P63082 | V-type proton ATPase 16 kDa proteolipid subunit                      | 0,3373 | 1,27 |
| P06745 | Glucose-6-phosphate isomerase                                        | 0,3391 | 0,70 |
| Q8R242 | Di-N-acetylchitinase                                                 | 0,3565 | 0,35 |
| Q9WUB6 | Chloride channel protein ClC-Kb                                      | 0,3634 | 0,89 |
| P70404 | Isocitrate dehydrogenase [NAD] subunit gamma 1, mitochondrial        | 0,3648 | 0,69 |
| P17742 | Peptidyl-prolyl cis-trans isomerase A                                | 0,3689 | 0,79 |
| Q91X52 | L-xylulose reductase                                                 | 0,3703 | 0,46 |
| P79457 | Histone demethylase UTY                                              | 0,3710 | 1,44 |
| Q9EQ20 | Methylmalonate-semialdehyde dehydrogenase [acylating], mitochondrial | 0,3783 | 0,41 |
| P09671 | Superoxide dismutase [Mn], mitochondrial                             | 0,3789 | 1,08 |
| P50285 | Dimethylaniline monooxygenase [N-oxide-forming] 1                    | 0,3789 | 1,08 |
| P26040 | Ezrin                                                                | 0,3831 | 0,44 |
| Q80W22 | Threonine synthase-like 2                                            | 0,3933 | 0,68 |
| P14131 | 40S ribosomal protein S16                                            | 0,3944 | 1,34 |
| Q93092 | Transaldolase                                                        | 0,3952 | 0,71 |
| P06797 | Cathepsin L1                                                         | 0,3984 | 0,97 |
| Q61425 | Hydroxyacyl-coenzyme A dehydrogenase, mitochondrial                  | 0,4118 | 1,13 |
| Q9D7B6 | Isobutyryl-CoA dehydrogenase, mitochondrial                          | 0,4131 | 0,56 |
| Q9DC37 | Major facilitator superfamily domain-containing protein 1            | 0,4157 | 0,74 |
| P13707 | Glycerol-3-phosphate dehydrogenase [NAD(+)], cytoplasmic             | 0,4163 | 0,39 |
| Q9DBJ1 | Phosphoglycerate mutase 1                                            | 0,4173 | 0,33 |
| Q9D823 | 60S ribosomal protein L37                                            | 0,4193 | 2,21 |
| Q3TLP5 | Enoyl-CoA hydratase domain-containing protein 2, mitochondrial       | 0,4214 | 1,07 |
| P54116 | Erythrocyte band 7 integral membrane protein                         | 0,4243 | 1,36 |
| P50247 | Adenosylhomocysteinase                                               | 0,4303 | 0,58 |
| Q9DCW4 | Electron transfer flavoprotein subunit beta                          | 0,4315 | 1,07 |
| Q32Q92 | Acyl-coenzyme A thioesterase 6                                       | 0,4318 | 1,46 |
| Q9DBF1 | Alpha-aminoadipic semialdehyde dehydrogenase                         | 0,4350 | 0,47 |
| Q61147 | Ceruloplasmin                                                        | 0,4368 | 1,78 |
| Q9CZ13 | Cytochrome b-c1 complex subunit 1, mitochondrial                     | 0,4441 | 0,46 |
| P62897 | Cytochrome c, somatic                                                | 0,4510 | 0,76 |

|        |                                                                               |        |      |
|--------|-------------------------------------------------------------------------------|--------|------|
| Q791V5 | Mitochondrial carrier homolog 2                                               | 0,4524 | 1,28 |
| Q9DCW2 | Phospholipid scramblase 2                                                     | 0,4527 | 0,61 |
| P45376 | Aldose reductase                                                              | 0,4536 | 0,67 |
| Q9D8E6 | 60S ribosomal protein L4                                                      | 0,4597 | 0,50 |
| P62830 | 60S ribosomal protein L23                                                     | 0,4643 | 0,44 |
| Q60676 | Serine/threonine-protein phosphatase 5                                        | 0,4706 | 1,19 |
| Q3TC72 | Fumarylacetoacetate hydrolase domain-containing protein 2A                    | 0,4731 | 0,44 |
| Q9CR51 | V-type proton ATPase subunit G 1                                              | 0,4754 | 1,47 |
| Q9DCT1 | 1,5-anhydro-D-fructose reductase                                              | 0,4755 | 1,32 |
| P35700 | Peroxiredoxin-1                                                               | 0,4762 | 1,02 |
| P97494 | Glutamate--cysteine ligase catalytic subunit                                  | 0,4813 | 0,59 |
| Q8BP48 | Methionine aminopeptidase 1                                                   | 0,4864 | 1,16 |
| P60766 | Cell division control protein 42 homolog                                      | 0,4873 | 0,82 |
| Q99NB1 | Acetyl-coenzyme A synthetase 2-like, mitochondrial                            | 0,4915 | 1,14 |
| P62855 | 40S ribosomal protein S26                                                     | 0,4943 | 0,90 |
| Q91ZD1 | Protein odd-skipped-related 2                                                 | 0,4985 | 1,11 |
| P08752 | Guanine nucleotide-binding protein G(i) subunit alpha-2                       | 0,4989 | 0,87 |
| P50544 | Very long-chain specific acyl-CoA dehydrogenase, mitochondrial                | 0,5091 | 0,52 |
| O70435 | Proteasome subunit alpha type-3                                               | 0,5111 | 0,57 |
| P0C8K7 | Small integral membrane protein 1                                             | 0,5183 | 0,78 |
| O09117 | Synaptophysin-like protein 1                                                  | 0,5255 | 0,56 |
| O55013 | Trafficking protein particle complex subunit 3                                | 0,5264 | 0,77 |
| P62908 | 40S ribosomal protein S3                                                      | 0,5273 | 0,47 |
| P10639 | Thioredoxin                                                                   | 0,5306 | 1,28 |
| Q8VDN2 | Sodium/potassium-transporting ATPase subunit alpha-1                          | 0,5320 | 0,37 |
| Q3TW96 | UDP-N-acetylhexosamine pyrophosphorylase-like protein 1                       | 0,5362 | 1,06 |
| Q3TH56 | S-adenosylmethionine synthase isoform type-2                                  | 0,5419 | 0,54 |
| Q8CHT0 | Delta-1-pyrroline-5-carboxylate dehydrogenase, mitochondrial                  | 0,5669 | 0,58 |
| Q9R0P5 | Destrin                                                                       | 0,5675 | 0,58 |
| Q8BGD4 | Solute carrier organic anion transporter family member 4C1                    | 0,5678 | 0,32 |
| P08905 | Lysozyme C-2                                                                  | 0,5735 | 0,91 |
| P05202 | Aspartate aminotransferase, mitochondrial                                     | 0,5775 | 0,31 |
| P35979 | 60S ribosomal protein L12                                                     | 0,5841 | 0,39 |
| A2BIM8 | Major urinary protein 18                                                      | 0,5864 | 0,85 |
| P04938 | Major urinary protein 11                                                      | 0,5864 | 0,85 |
| P60335 | Poly(rC)-binding protein 1                                                    | 0,6040 | 0,40 |
| Q68FL4 | Putative adenosylhomocysteinase 3                                             | 0,6052 | 0,71 |
| Q923D2 | Flavin reductase (NADPH)                                                      | 0,6075 | 0,80 |
| Q9R112 | Sulfide:quinone oxidoreductase, mitochondrial                                 | 0,6076 | 0,80 |
| O54734 | Dolichyl-diphosphooligosaccharide--protein glycosyltransferase 48 kDa subunit | 0,6076 | 0,80 |
| O35350 | Calpain-1 catalytic subunit                                                   | 0,6077 | 0,80 |
| P97314 | Cysteine and glycine-rich protein 2                                           | 0,6090 | 0,89 |
| Q9D964 | Glycine amidinotransferase, mitochondrial                                     | 0,6237 | 0,26 |
| Q91VM9 | Inorganic pyrophosphatase 2, mitochondrial                                    | 0,6274 | 0,65 |
| P56395 | Cytochrome b5                                                                 | 0,6291 | 0,76 |
| Q99JY3 | GTPase IMAP family member 4                                                   | 0,6292 | 0,76 |
| Q91X17 | Uromodulin                                                                    | 0,6292 | 0,76 |
| P29699 | Alpha-2-HS-glycoprotein                                                       | 0,6414 | 0,30 |
| P97315 | Cysteine and glycine-rich protein 1                                           | 0,6421 | 0,55 |
| Q6PDN3 | Myosin light chain kinase, smooth muscle                                      | 0,6422 | 0,32 |
| P28665 | Murinoglobulin-1                                                              | 0,6431 | 0,53 |
| P70296 | Phosphatidylethanolamine-binding protein 1                                    | 0,6522 | 0,32 |
| P99024 | Tubulin beta-5 chain                                                          | 0,6683 | 0,44 |
| P63276 | 40S ribosomal protein S17                                                     | 0,6714 | 0,30 |
| Q8CD54 | Piezo-type mechanosensitive ion channel component 2                           | 0,6736 | 0,66 |
| Q6P8X1 | Sorting nexin-6                                                               | 0,6740 | 0,66 |
| Q8CHG5 | Apoptosis-resistant E3 ubiquitin protein ligase 1                             | 0,6741 | 0,66 |
| Q8C129 | Leucyl-cystinyl aminopeptidase                                                | 0,6741 | 0,66 |
| Q78J03 | Methionine-R-sulfoxide reductase B2, mitochondrial                            | 0,6742 | 0,66 |
| Q9D565 | WD repeat-containing protein 64                                               | 0,6744 | 0,66 |
| Q9Z0X1 | Apoptosis-inducing factor 1, mitochondrial                                    | 0,6746 | 0,66 |
| Q8CG76 | Aflatoxin B1 aldehyde reductase member 2                                      | 0,6904 | 0,30 |
| Q9D826 | Peroxisomal sarcosine oxidase                                                 | 0,7024 | 0,27 |
| P09411 | Phosphoglycerate kinase 1                                                     | 0,7094 | 0,32 |
| Q99PG0 | Arylacetamide deacetylase                                                     | 0,7243 | 0,56 |
| P67984 | 60S ribosomal protein L22                                                     | 0,7243 | 0,56 |
| O89106 | Bis(5'-adenosyl)-triphosphatase                                               | 0,7324 | 0,50 |
| O70325 | Phospholipid hydroperoxide glutathione peroxidase, mitochondrial              | 0,7364 | 0,33 |
| P19253 | 60S ribosomal protein L13a                                                    | 0,7396 | 0,25 |
| O55143 | Sarcoplasmic/endoplasmic reticulum calcium ATPase 2                           | 0,7430 | 0,52 |

|        |                                                                          |        |       |
|--------|--------------------------------------------------------------------------|--------|-------|
| Q91YQ5 | Dolichyl-diphosphooligosaccharide--protein glycosyltransferase subunit 1 | 0,7434 | 0,52  |
| Q8RON6 | Hydroxyacid-oxoacid transhydrogenase, mitochondrial                      | 0,7468 | 0,52  |
| Q61419 | Cytidine monophosphate-N-acetylneuraminic acid hydroxylase               | 0,7469 | 0,52  |
| Q9WTL7 | Acyl-protein thioesterase 2                                              | 0,7503 | 0,74  |
| Q78JN3 | Enoyl-CoA delta isomerase 3, peroxisomal                                 | 0,7516 | 0,28  |
| Q8R0F8 | Acylpyruvase FAHD1, mitochondrial                                        | 0,7648 | 0,29  |
| Q91WD5 | NADH dehydrogenase [ubiquinone] iron-sulfur protein 2, mitochondrial     | 0,7704 | 0,67  |
| Q61233 | Plastin-2                                                                | 0,7880 | 0,35  |
| P46412 | Glutathione peroxidase 3                                                 | 0,7926 | 0,60  |
| Q9QYR9 | Acyl-coenzyme A thioesterase 2, mitochondrial                            | 0,7930 | 0,33  |
| Q62261 | Spectrin beta chain, non-erythrocytic 1                                  | 0,7945 | 0,42  |
| Q9Z1D1 | Eukaryotic translation initiation factor 3 subunit G                     | 0,7948 | 0,42  |
| Q9D8U8 | Sorting nexin-5                                                          | 0,7950 | 0,42  |
| P52760 | Ribonuclease UK114                                                       | 0,7982 | 0,38  |
| Q8R1G2 | Carboxymethylenebutenolidase homolog                                     | 0,8027 | 0,30  |
| Q8VHL0 | Urea transporter 1                                                       | 0,8407 | 0,45  |
| P62320 | Small nuclear ribonucleoprotein Sm D3                                    | 0,8495 | 0,28  |
| Q8BIJ6 | Isoleucine--tRNA ligase, mitochondrial                                   | 0,8850 | 0,25  |
| Q64467 | Glyceraldehyde-3-phosphate dehydrogenase, testis-specific                | 0,1398 | 1,93  |
| P10605 | Cathepsin B                                                              | 0,0436 | 1,59  |
| P56389 | Cytidine deaminase                                                       | 0,1802 | 1,53  |
| P52480 | Pyruvate kinase PKM                                                      | 0,0333 | 2,67  |
| O08709 | Peroxioredoxin-6                                                         | 0,4180 | 1,60  |
| P26043 | Radixin                                                                  | 0,0652 | 4,75  |
| Q01853 | Transitional endoplasmic reticulum ATPase                                | 0,4671 | 1,58  |
| Q9DC50 | Peroxisomal carnitine O-octanoyltransferase                              | 0,0705 | 1,94  |
| Q9QXD6 | Fructose-1,6-bisphosphatase 1                                            | 0,3324 | 1,68  |
| Q6ZVV3 | 60S ribosomal protein L10                                                | 0,1784 | 1,87  |
| P86048 | 60S ribosomal protein L10-like                                           | 0,1784 | 1,87  |
| P61079 | Ubiquitin-conjugating enzyme E2 D3                                       | 0,5964 | 1,53  |
| P62838 | Ubiquitin-conjugating enzyme E2 D2                                       | 0,5964 | 1,53  |
| Q9CPU0 | Lactoylglutathione lyase                                                 | 0,1631 | 1,64  |
| Q9NYQ2 | Hydroxyacid oxidase 2                                                    | 0,3459 | 1,74  |
| Q60597 | 2-oxoglutarate dehydrogenase, mitochondrial                              | 0,0856 | 1,74  |
| Q9WVJ3 | Carboxypeptidase Q                                                       | 0,1186 | 1,05  |
| P60764 | Ras-related C3 botulinum toxin substrate 3                               | 0,5911 | 2,56  |
| Q05144 | Ras-related C3 botulinum toxin substrate 2                               | 0,7862 | 1,51  |
| P84096 | Rho-related GTP-binding protein RhoG                                     | 0,3259 | 1,61  |
| Q9ER71 | Rho-related GTP-binding protein RhoJ                                     | 0,0612 | 3,74  |
| Q61696 | Heat shock 70 kDa protein 1A                                             | 0,2066 | 1,97  |
| Q91WU0 | Carboxylesterase 1F                                                      | 0,3664 | 1,52  |
| Q9D0F3 | Protein ERGIC-53                                                         | 0,3739 | 3,37  |
| Q8QZY2 | Glycerate kinase                                                         | 0,5695 | 1,62  |
| Q8BKCS | Importin-5                                                               | 0,3739 | 3,03  |
| Q9JLB4 | Cubilin                                                                  | 0,1208 | 2,06  |
| Q9D7I0 | Protein shisa-5                                                          | 0,1707 | 42,00 |
| P83940 | Transcription elongation factor B polypeptide 1                          | 0,3739 | 29,00 |
| Q3UDE2 | Tubulin--tyrosine ligase-like protein 12                                 | 0,6308 | 2,21  |
| P28666 | Murinoglobulin-2                                                         | 0,5811 | 1,92  |
| Q99L27 | GMP reductase 2                                                          | 0,1910 | 1,53  |
| O08581 | Potassium channel subfamily K member 1                                   | 0,3739 | 28,00 |
| Q61753 | D-3-phosphoglycerate dehydrogenase                                       | 0,3739 | 27,33 |
| Q8R0Y6 | Cytosolic 10-formyltetrahydrofolate dehydrogenase                        | 0,0524 | 1,77  |
| P61082 | NEDD8-conjugating enzyme Ubc12                                           | 0,3739 | 25,67 |
| Q9CWD8 | Iron-sulfur protein NUBPL                                                | 0,3739 | 25,67 |
| Q9EQP2 | EH domain-containing protein 4                                           | 0,3739 | 25,67 |
| Q8K183 | Pyridoxal kinase                                                         | 0,1285 | 42,33 |
| Q9D8T7 | SRA stem-loop-interacting RNA-binding protein, mitochondrial             | 0,6110 | 1,70  |
| Q9EPU0 | Regulator of nonsense transcripts 1                                      | 0,1371 | 38,33 |
| Q9Z1W8 | Potassium-transporting ATPase alpha chain 2                              | 0,2089 | 2,57  |
| A2AVZ9 | Solute carrier family 43 member 3                                        | 0,1297 | 38,67 |
| Q6P4T0 | Autophagy-related protein 2 homolog A                                    | 0,3739 | 23,33 |
| P80315 | T-complex protein 1 subunit delta                                        | 0,3739 | 23,00 |
| P04117 | Fatty acid-binding protein, adipocyte                                    | 0,3739 | 23,00 |
| Q9CZR2 | N-acetylated-alpha-linked acidic dipeptidase 2                           | 0,2826 | 1,68  |
| Q9DBT9 | Dimethylglycine dehydrogenase, mitochondrial                             | 0,3739 | 22,67 |
| Q99LF4 | tRNA-splicing ligase RtcB homolog                                        | 0,5000 | 1,78  |
| Q8R180 | ERO1-like protein alpha                                                  | 0,1162 | 41,00 |
| P11404 | Fatty acid-binding protein, heart                                        | 0,3739 | 21,33 |
| Q9Z130 | Heterogeneous nuclear ribonucleoprotein D-like                           | 0,3739 | 21,33 |

|        |                                                                   |        |       |
|--------|-------------------------------------------------------------------|--------|-------|
| Q3UMF0 | Cordon-bleu protein-like 1                                        | 0,1166 | 39,67 |
| Q9D273 | Cob(II)yrinic acid a,c-diamide adenosyltransferase, mitochondrial | 0,3739 | 20,67 |
| Q9D6Y7 | Mitochondrial peptide methionine sulfoxide reductase              | 0,3739 | 20,67 |
| P62737 | Actin, aortic smooth muscle                                       | 0,1273 | 34,67 |
| P63268 | Actin, gamma-enteric smooth muscle                                | 0,6839 | 1,88  |
| Q8R1Q9 | Ribokinase                                                        | 0,3739 | 20,00 |
| O08756 | 3-hydroxyacyl-CoA dehydrogenase type-2                            | 0,1346 | 31,67 |
| Q02248 | Catenin beta-1                                                    | 0,3739 | 19,00 |
| Q99L13 | 3-hydroxyisobutyrate dehydrogenase, mitochondrial                 | 0,1274 | 44,33 |
| P55014 | Solute carrier family 12 member 1                                 | 0,3739 | 18,67 |
| Q6A0A9 | Constitutive coactivator of PPAR-gamma-like protein 1             | 0,3739 | 18,67 |
| Q8BT60 | Copine-3                                                          | 0,3739 | 17,33 |
| P62307 | Small nuclear ribonucleoprotein F                                 | 0,1178 | 31,67 |
| Q9JIY7 | N-acetyltransferase 8                                             | 0,3739 | 17,00 |
| Q6ZQI3 | Malectin                                                          | 0,3739 | 17,00 |
| Q9JIF9 | Signal peptide peptidase-like 2A                                  | 0,1448 | 45,00 |
| P63254 | Cysteine-rich protein 1                                           | 0,3739 | 17,00 |
| P35564 | Calnexin                                                          | 0,3739 | 17,00 |
| Q9CR21 | Acyl carrier protein, mitochondrial                               | 0,3739 | 16,67 |
| Q6P9Q6 | FK506-binding protein 15                                          | 0,3739 | 16,67 |
| Q3UHK1 | Proton myo-inositol cotransporter                                 | 0,1220 | 36,67 |
| Q6PDY2 | 2-aminoethanethiol dioxygenase                                    | 0,3739 | 16,67 |
| Q2TPA8 | Hydroxysteroid dehydrogenase-like protein 2                       | 0,3739 | 16,33 |
| Q8K0Z7 | Translational activator of cytochrome c oxidase 1                 | 0,1525 | 45,33 |
| O35566 | CD151 antigen                                                     | 0,3739 | 16,33 |
| Q61496 | Probable ATP-dependent RNA helicase DDX4                          | 0,3739 | 16,00 |
| Q8CFA2 | Aminomethyltransferase, mitochondrial                             | 0,3739 | 16,00 |
| Q8K1R3 | Polyrribonucleotide nucleotidyltransferase 1, mitochondrial       | 0,3739 | 16,00 |
| P57776 | Elongation factor 1-delta                                         | 0,3739 | 16,00 |
| Q61553 | Fascin                                                            | 0,3739 | 15,67 |
| Q8R050 | Eukaryotic peptide chain release factor GTP-binding subunit ERF3A | 0,3739 | 15,33 |
| Q80TN5 | Palmitoyltransferase ZDHHC17                                      | 0,3739 | 15,33 |
| P48754 | Breast cancer type 1 susceptibility protein homolog               | 0,3739 | 15,33 |
| P15533 | Tripartite motif-containing protein 30A                           | 0,3739 | 15,33 |
| Q9QZ88 | Vacuolar protein sorting-associated protein 29                    | 0,3739 | 15,33 |
| P48758 | Carbonyl reductase [NADPH] 1                                      | 0,3739 | 15,33 |
| P67871 | Casein kinase II subunit beta                                     | 0,1162 | 30,00 |
| P29387 | Guanine nucleotide-binding protein subunit beta-4                 | 0,1662 | 22,00 |
| Q6ZQ38 | Cullin-associated NEDD8-dissociated protein 1                     | 0,3739 | 15,00 |
| Q501J6 | Probable ATP-dependent RNA helicase DDX17                         | 0,3739 | 15,00 |
| Q61656 | Probable ATP-dependent RNA helicase DDX5                          | 0,3739 | 15,00 |
| P11588 | Major urinary protein 1                                           | 0,1174 | 30,00 |
| P86049 | Probable RNA-binding protein 46                                   | 0,3739 | 14,67 |
| O08638 | Myosin-11                                                         | 0,1210 | 31,00 |
| Q61879 | Myosin-10                                                         | 0,3739 | 14,33 |
| O35516 | Neurogenic locus notch homolog protein 2                          | 0,5260 | 1,91  |
| Q8CI51 | PDZ and LIM domain protein 5                                      | 0,3739 | 14,33 |
| Q9D8W5 | 26S proteasome non-ATPase regulatory subunit 12                   | 0,3739 | 14,00 |
| Q8VC69 | Solute carrier family 22 member 6                                 | 0,3739 | 14,00 |
| A2A5R2 | Brefeldin A-inhibited guanine nucleotide-exchange protein 2       | 0,3739 | 14,00 |
| Q8VDQ1 | Prostaglandin reductase 2                                         | 0,1363 | 34,67 |
| Q9DCT8 | Cysteine-rich protein 2                                           | 0,3739 | 13,67 |
| P16332 | Methylmalonyl-CoA mutase, mitochondrial                           | 0,1525 | 36,67 |
| O70228 | Probable phospholipid-transporting ATPase IIA                     | 0,3739 | 13,00 |
| P08228 | Superoxide dismutase [Cu-Zn]                                      | 0,1204 | 23,33 |
| Q8BWM0 | Prostaglandin E synthase 2                                        | 0,1677 | 30,67 |
| P31428 | Dipeptidase 1                                                     | 0,3039 | 2,16  |
| B2RSH2 | Guanine nucleotide-binding protein G(i) subunit alpha-1           | 0,6707 | 1,61  |
| Q9D8B4 | NADH dehydrogenase [ubiquinone] 1 alpha subcomplex subunit 11     | 0,3739 | 31,00 |
| Q08857 | Platelet glycoprotein 4                                           | 0,3739 | 31,00 |
| P63101 | 14-3-3 protein zeta/delta                                         | 0,1274 | 48,33 |
| Q9CQY6 | Ubiquinol-cytochrome-c reductase complex assembly factor 2        | 0,1231 | 6,10  |
| P80313 | T-complex protein 1 subunit eta                                   | 0,7653 | 1,57  |
| P14824 | Annexin A6                                                        | 0,3739 | 26,33 |
| P47856 | Glutamine-fructose-6-phosphate aminotransferase [isomerizing] 1   | 0,3739 | 26,00 |
| P16045 | Galectin-1                                                        | 0,1192 | 4,60  |
| O70433 | Four and a half LIM domains protein 2                             | 0,3739 | 24,67 |
| Q8R4N0 | Citrate lyase subunit beta-like protein, mitochondrial            | 0,3739 | 24,00 |
| Q9Z1Q5 | Chloride intracellular channel protein 1                          | 0,3739 | 23,00 |
| Q922F4 | Tubulin beta-6 chain                                              | 0,3739 | 22,33 |

|        |                                                                      |        |       |
|--------|----------------------------------------------------------------------|--------|-------|
| P26516 | 26S proteasome non-ATPase regulatory subunit 7                       | 0,3739 | 22,00 |
| P17710 | Hexokinase-1                                                         | 0,3739 | 22,00 |
| P00756 | Kallikrein 1-related peptidase b3                                    | 0,1183 | 37,00 |
| O35660 | Glutathione S-transferase Mu 6                                       | 0,3472 | 2,73  |
| Q61411 | GTPase HRas                                                          | 0,3739 | 20,00 |
| P03958 | Adenosine deaminase                                                  | 0,3739 | 19,33 |
| Q9R1Q7 | Proteolipid protein 2                                                | 0,3739 | 18,67 |
| Q3UX10 | Tubulin alpha chain-like 3                                           | 0,1166 | 37,67 |
| Q91VD9 | NADH-ubiquinone oxidoreductase 75 kDa subunit, mitochondrial         | 0,3739 | 18,33 |
| Q3UMB9 | WASH complex subunit 7                                               | 0,3739 | 17,67 |
| P09055 | Integrin beta-1                                                      | 0,3739 | 17,67 |
| Q99N95 | 39S ribosomal protein L3, mitochondrial                              | 0,1179 | 36,00 |
| Q6ZQ93 | Ubiquitin carboxyl-terminal hydrolase 34                             | 0,3739 | 13,67 |
| Q8BFS6 | Serine/threonine-protein phosphatase CPPED1                          | 0,3739 | 13,00 |
| Q9Z1Q9 | Valine--tRNA ligase                                                  | 0,3739 | 12,67 |
| Q05860 | Formin-1                                                             | 0,5922 | 1,72  |
| Q7TNG8 | Probable D-lactate dehydrogenase, mitochondrial                      | 0,0061 | 0,74  |
| P08249 | Malate dehydrogenase, mitochondrial                                  | 0,2458 | 1,06  |
| Q91V76 | Ester hydrolase C11orf54 homolog                                     | 0,7194 | 0,96  |
| P00329 | Alcohol dehydrogenase 1                                              | 0,0219 | 0,76  |
| O09173 | Homogentisate 1,2-dioxygenase                                        | 0,8619 | 0,98  |
| Q80X90 | Filamin-B                                                            | 0,4996 | 1,20  |
| Q8BTM8 | Filamin-A                                                            | 0,4605 | 1,23  |
| P62889 | 60S ribosomal protein L30                                            | 0,8773 | 1,03  |
| Q9WUM5 | Succinate--CoA ligase [ADP/GDP-forming] subunit alpha, mitochondrial | 0,5421 | 1,13  |
| Q64442 | Sorbitol dehydrogenase                                               | 0,3084 | 1,27  |
| Q60932 | Voltage-dependent anion-selective channel protein 1                  | 0,2920 | 1,28  |
| P99029 | Peroxiredoxin-5, mitochondrial                                       | 0,5812 | 0,93  |
| Q3UNX5 | Acyl-coenzyme A synthetase ACSM3, mitochondrial                      | 0,1252 | 1,25  |
| Q8JZV9 | 3-hydroxybutyrate dehydrogenase type 2                               | 0,8457 | 1,04  |
| Q9JHW2 | Omega-amidase NIT2                                                   | 0,2662 | 0,89  |
| Q07417 | Short-chain specific acyl-CoA dehydrogenase, mitochondrial           | 0,4157 | 1,33  |
| Q8BFR5 | Elongation factor Tu, mitochondrial                                  | 0,5328 | 0,89  |
| Q8BWT1 | 3-ketoacyl-CoA thiolase, mitochondrial                               | 0,0734 | 1,28  |
| Q8QZT1 | Acetyl-CoA acetyltransferase, mitochondrial                          | 0,1380 | 1,15  |
| P47791 | Glutathione reductase, mitochondrial                                 | 0,8181 | 0,97  |
| P35762 | CD81 antigen                                                         | 0,8661 | 0,95  |
| Q61598 | Rab GDP dissociation inhibitor beta                                  | 0,7405 | 0,95  |
| P47962 | 60S ribosomal protein L5                                             | 0,2268 | 0,81  |
| Q91X72 | Hemopexin                                                            | 0,7404 | 1,07  |
| P68040 | Receptor of activated protein C kinase 1                             | 0,4498 | 1,13  |
| P20108 | Thioredoxin-dependent peroxide reductase, mitochondrial              | 0,9721 | 0,99  |
| Q9DCZ1 | GMP reductase 1                                                      | 0,9212 | 1,03  |
| Q9D6F9 | Tubulin beta-4A chain                                                | 0,5368 | 1,25  |
| P68372 | Tubulin beta-4B chain                                                | 0,5368 | 1,25  |
| Q68FD5 | Clathrin heavy chain 1                                               | 0,6972 | 0,93  |
| Q9DCM0 | Persulfide dioxygenase ETHE1, mitochondrial                          | 0,2318 | 1,18  |
| O08749 | Dihydrolipoyl dehydrogenase, mitochondrial                           | 0,3164 | 1,46  |
| P47738 | Aldehyde dehydrogenase, mitochondrial                                | 0,1890 | 1,33  |
| O35658 | Complement component 1 Q subcomponent-binding protein, mitochondrial | 0,4712 | 1,13  |
| P63038 | 60 kDa heat shock protein, mitochondrial                             | 0,8019 | 1,07  |
| P50396 | Rab GDP dissociation inhibitor alpha                                 | 0,6659 | 0,81  |
| Q9JLJ2 | 4-trimethylaminobutyraldehyde dehydrogenase                          | 0,8780 | 1,07  |
| P05064 | Fructose-bisphosphate aldolase A                                     | 0,7235 | 0,92  |
| P14206 | 40S ribosomal protein SA                                             | 0,1197 | 0,75  |
| Q91Z53 | Glyoxylate reductase/hydroxypyruvate reductase                       | 0,2334 | 0,75  |
| Q91VA0 | Acyl-coenzyme A synthetase ACSM1, mitochondrial                      | 0,6195 | 0,91  |
| Q9CPY7 | Cytosol aminopeptidase                                               | 0,5987 | 1,09  |
| Q64516 | Glycerol kinase                                                      | 0,6952 | 1,10  |
| P40124 | Adenylyl cyclase-associated protein 1                                | 0,8136 | 1,06  |
| P00493 | Hypoxanthine-guanine phosphoribosyltransferase                       | 0,3267 | 1,24  |
| P28271 | Cytoplasmic aconitate hydratase                                      | 0,3998 | 1,41  |
| P28474 | Alcohol dehydrogenase class-3                                        | 0,2329 | 0,84  |
| Q62468 | Villin-1                                                             | 0,8334 | 1,05  |
| Q92317 | Sodium/glucose cotransporter 2                                       | 0,3528 | 0,72  |
| P51855 | Glutathione synthetase                                               | 0,8499 | 1,03  |
| O35488 | Very long-chain acyl-CoA synthetase                                  | 0,4246 | 1,23  |
| P51660 | Peroxisomal multifunctional enzyme type 2                            | 0,1531 | 1,30  |
| P14152 | Malate dehydrogenase, cytoplasmic                                    | 0,1929 | 0,72  |
| Q9D404 | 3-oxoacyl-[acyl-carrier-protein] synthase, mitochondrial             | 0,2238 | 0,63  |

|        |                                                                                                          |        |      |
|--------|----------------------------------------------------------------------------------------------------------|--------|------|
| P27659 | 60S ribosomal protein L3                                                                                 | 0,7554 | 1,09 |
| P16125 | L-lactate dehydrogenase B chain                                                                          | 0,9876 | 1,00 |
| Q11136 | Xaa-Pro dipeptidase                                                                                      | 0,3138 | 0,81 |
| Q9D1A2 | Cytosolic non-specific dipeptidase                                                                       | 0,7647 | 1,14 |
| O89017 | Legumain                                                                                                 | 0,8267 | 1,16 |
| P63001 | Ras-related C3 botulinum toxin substrate 1                                                               | 0,3053 | 1,34 |
| P14869 | 60S acidic ribosomal protein P0                                                                          | 0,7269 | 1,18 |
| O88428 | Bifunctional 3'-phosphoadenosine 5'-phosphosulfate synthase 2                                            | 0,5860 | 1,17 |
| Q7TMS5 | ATP-binding cassette sub-family G member 2                                                               | 0,9860 | 1,00 |
| Q99KC8 | von Willebrand factor A domain-containing protein 5A                                                     | 0,4445 | 1,47 |
| Q99JW2 | Aminoacylase-1                                                                                           | 0,0656 | 0,93 |
| P68373 | Tubulin alpha-1C chain                                                                                   | 0,2550 | 1,34 |
| P58252 | Elongation factor 2                                                                                      | 0,3977 | 1,26 |
| Q61838 | Pregnancy zone protein                                                                                   | 0,3041 | 0,71 |
| P35505 | Fumarylacetoacetase                                                                                      | 0,6339 | 1,18 |
| Q99LX0 | Protein deglycase DJ-1                                                                                   | 0,7793 | 1,07 |
| P62911 | 60S ribosomal protein L32                                                                                | 0,0730 | 1,33 |
| Q8BMF4 | Dihydrolypoyllysine-residue acetyltransferase component of pyruvate dehydrogenase complex, mitochondrial | 0,1570 | 1,28 |
| P36552 | Oxygen-dependent coproporphyrinogen-III oxidase, mitochondrial                                           | 0,0121 | 0,68 |
| Q3TNA1 | Xylulose kinase                                                                                          | 0,6434 | 0,89 |
| P15105 | Glutamine synthetase                                                                                     | 0,8412 | 1,14 |
| P97461 | 40S ribosomal protein S5                                                                                 | 0,5592 | 0,89 |
| Q8R527 | Rho-related GTP-binding protein RhoQ                                                                     | 0,8384 | 0,89 |
| P05063 | Fructose-bisphosphate aldolase C                                                                         | 1,0000 | 1,00 |
| P98197 | Probable phospholipid-transporting ATPase IH                                                             | 0,4847 | 0,86 |
| P01837 | Ig kappa chain C region                                                                                  | 0,9729 | 1,02 |
| Q61990 | Poly(rC)-binding protein 2                                                                               | 0,3752 | 1,17 |
| O88844 | Isocitrate dehydrogenase [NADP] cytoplasmic                                                              | 0,4420 | 1,16 |
| P97447 | Four and a half LIM domains protein 1                                                                    | 0,6386 | 0,86 |
| Q8R164 | Valacyclovir hydrolase                                                                                   | 0,7157 | 1,11 |
| Q8BMK4 | Cytoskeleton-associated protein 4                                                                        | 0,2833 | 1,25 |
| Q03734 | Serine protease inhibitor A3M                                                                            | 0,9850 | 0,98 |
| Q8C3K6 | Sodium/glucose cotransporter 1                                                                           | 0,3546 | 1,38 |
| Q8BWF0 | Succinate-semialdehyde dehydrogenase, mitochondrial                                                      | 0,9080 | 1,07 |
| Q3ULD5 | Methylcrotonoyl-CoA carboxylase beta chain, mitochondrial                                                | 0,6511 | 0,84 |
| P06151 | L-lactate dehydrogenase A chain                                                                          | 0,2012 | 0,69 |
| Q8BH00 | Aldehyde dehydrogenase family 8 member A1                                                                | 0,8297 | 1,08 |
| Q99KR3 | Endoribonuclease LACTB2                                                                                  | 0,6900 | 1,10 |
| Q9JIL4 | Na(+)/H(+) exchange regulatory cofactor NHE-RF3                                                          | 0,4678 | 0,83 |
| P55264 | Adenosine kinase                                                                                         | 0,7995 | 0,97 |
| P11352 | Glutathione peroxidase 1                                                                                 | 0,3453 | 0,82 |
| Q9D0S9 | Histidine triad nucleotide-binding protein 2, mitochondrial                                              | 0,7126 | 0,67 |
| Q91VI7 | Ribonuclease inhibitor                                                                                   | 0,5858 | 0,72 |
| P06801 | NADP-dependent malic enzyme                                                                              | 0,8861 | 1,05 |
| Q9D6R2 | Isocitrate dehydrogenase [NAD] subunit alpha, mitochondrial                                              | 0,7136 | 1,14 |
| Q9JIZ9 | Phospholipid scramblase 3                                                                                | 0,8590 | 1,15 |
| O08553 | Dihydropyrimidinase-related protein 2                                                                    | 0,7997 | 0,88 |
| Q64462 | Cytochrome P450 4B1                                                                                      | 0,6487 | 0,88 |
| P62264 | 40S ribosomal protein S14                                                                                | 0,1034 | 1,26 |
| P62858 | 40S ribosomal protein S28                                                                                | 0,4193 | 1,28 |
| P26443 | Glutamate dehydrogenase 1, mitochondrial                                                                 | 0,8695 | 1,05 |
| Q9R0H0 | Peroxisomal acyl-coenzyme A oxidase 1                                                                    | 0,6703 | 0,86 |
| P26039 | Talin-1                                                                                                  | 0,7050 | 0,67 |
| Q8VHX6 | Filamin-C                                                                                                | 1,0000 | 1,00 |
| Q9Z2J0 | Solute carrier family 23 member 1                                                                        | 0,3110 | 0,78 |
| P14094 | Sodium/potassium-transporting ATPase subunit beta-1                                                      | 0,7219 | 1,11 |
| Q9D172 | ES1 protein homolog, mitochondrial                                                                       | 0,7218 | 0,90 |
| Q99JY9 | Actin-related protein 3                                                                                  | 0,9190 | 1,08 |
| Q99LB2 | Dehydrogenase/reductase SDR family member 4                                                              | 0,4674 | 1,42 |
| Q3UNZ8 | Quinone oxidoreductase-like protein 2                                                                    | 0,8974 | 0,98 |
| Q9DD20 | Methyltransferase-like protein 7B                                                                        | 0,5799 | 1,12 |
| Q8R086 | Sulfite oxidase, mitochondrial                                                                           | 0,4687 | 0,79 |
| P09470 | Angiotensin-converting enzyme                                                                            | 0,8513 | 0,96 |
| Q99KB8 | Hydroxyacylglutathione hydrolase, mitochondrial                                                          | 0,6913 | 0,87 |
| O88575 | Sodium- and chloride-dependent transporter XTRP3B                                                        | 0,4285 | 0,90 |
| Q9QUI0 | Transforming protein RhoA                                                                                | 0,3269 | 0,73 |
| Q62159 | Rho-related GTP-binding protein RhoC                                                                     | 0,3269 | 0,73 |
| Q9CR57 | 60S ribosomal protein L14                                                                                | 0,5029 | 1,15 |
| P27773 | Protein disulfide-isomerase A3                                                                           | 0,7231 | 0,88 |

|        |                                                                 |        |      |
|--------|-----------------------------------------------------------------|--------|------|
| Q9DBE0 | Cysteine sulfinic acid decarboxylase                            | 0,0586 | 0,67 |
| Q9ES97 | Reticulon-3                                                     | 0,9620 | 1,03 |
| P16627 | Heat shock 70 kDa protein 1-like                                | 0,3330 | 1,31 |
| Q5U5V2 | Hydroxylysine kinase                                            | 0,0561 | 0,72 |
| P48722 | Heat shock 70 kDa protein 4L                                    | 0,0191 | 0,75 |
| P34914 | Bifunctional epoxide hydrolase 2                                | 0,9244 | 0,97 |
| O35643 | AP-1 complex subunit beta-1                                     | 0,6526 | 0,91 |
| P16675 | Lysosomal protective protein                                    | 0,2582 | 0,97 |
| P51410 | 60S ribosomal protein L9                                        | 0,5308 | 0,74 |
| Q8BH95 | Enoyl-CoA hydratase, mitochondrial                              | 0,4943 | 1,20 |
| P97328 | Ketohexokinase                                                  | 0,9040 | 1,05 |
| P19096 | Fatty acid synthase                                             | 0,7863 | 1,23 |
| Q8CGC7 | Bifunctional glutamate/proline--tRNA ligase                     | 0,5297 | 0,72 |
| O08917 | Flotillin-1                                                     | 0,4743 | 1,14 |
| Q8BFZ3 | Beta-actin-like protein 2                                       | 0,2868 | 0,86 |
| Q9Z1N5 | Spliceosome RNA helicase Ddx39b                                 | 0,1556 | 1,36 |
| Q9JJZ2 | Tubulin alpha-8 chain                                           | 0,7360 | 1,18 |
| P62814 | V-type proton ATPase subunit B, brain isoform                   | 0,8476 | 1,10 |
| Q60759 | Glutaryl-CoA dehydrogenase, mitochondrial                       | 0,6959 | 0,71 |
| Q5SWY8 | Sodium/glucose cotransporter 5                                  | 0,6159 | 0,67 |
| Q9QXD1 | Peroxisomal acyl-coenzyme A oxidase 2                           | 0,6897 | 0,83 |
| Q922Q1 | Mitochondrial amidoxime reducing component 2                    | 0,8506 | 1,07 |
| Q8QZY6 | Tetraspanin-14                                                  | 0,5856 | 0,77 |
| Q9CPV4 | Glyoxalase domain-containing protein 4                          | 0,8313 | 0,82 |
| Q6ZWY3 | 40S ribosomal protein S27-like                                  | 0,4290 | 1,11 |
| P30416 | Peptidyl-prolyl cis-trans isomerase FKBP4                       | 0,9231 | 1,03 |
| Q8CAY6 | Acetyl-CoA acetyltransferase, cytosolic                         | 0,3573 | 0,74 |
| Q8VCH0 | 3-ketoacyl-CoA thiolase B, peroxisomal                          | 0,7097 | 0,75 |
| Q7TPR4 | Alpha-actinin-1                                                 | 0,7979 | 0,93 |
| Q64737 | Trifunctional purine biosynthetic protein adenosine-3           | 0,8981 | 1,10 |
| Q9DCM2 | Glutathione S-transferase kappa 1                               | 0,8223 | 0,84 |
| P62827 | GTP-binding nuclear protein Ran                                 | 0,2888 | 0,81 |
| Q64105 | Sepiapterin reductase                                           | 0,4058 | 0,84 |
| P62717 | 60S ribosomal protein L18a                                      | 0,7849 | 0,95 |
| P70349 | Histidine triad nucleotide-binding protein 1                    | 0,6606 | 0,89 |
| Q9D1P4 | Cysteine and histidine-rich domain-containing protein 1         | 0,6895 | 0,87 |
| P70290 | 55 kDa erythrocyte membrane protein                             | 0,8267 | 0,92 |
| Q91XR9 | Phospholipid hydroperoxide glutathione peroxidase, nuclear      | 0,8775 | 1,12 |
| Q8BWN8 | Acyl-coenzyme A thioesterase 4                                  | 0,7033 | 1,34 |
| P21981 | Protein-glutamine gamma-glutamyltransferase 2                   | 0,7887 | 0,80 |
| O88398 | Advillin                                                        | 0,1289 | 0,81 |
| O88990 | Alpha-actinin-3                                                 | 0,4298 | 0,70 |
| Q9JI91 | Alpha-actinin-2                                                 | 0,9517 | 1,05 |
| Q9DCS3 | Trans-2-enoyl-CoA reductase, mitochondrial                      | 0,9197 | 1,11 |
| A3KMP2 | Tetratricopeptide repeat protein 38                             | 0,3249 | 0,60 |
| Q9D1R9 | 60S ribosomal protein L34                                       | 0,8852 | 0,97 |
| Q68FL6 | Methionine--tRNA ligase, cytoplasmic                            | 0,9122 | 1,17 |
| Q64331 | Unconventional myosin-VI                                        | 0,6560 | 0,70 |
| Q64514 | Tripeptidyl-peptidase 2                                         | 0,0842 | 0,61 |
| P16406 | Glutamyl aminopeptidase                                         | 0,6591 | 1,10 |
| Q8BVQ5 | Protein phosphatase methylesterase 1                            | 0,9932 | 0,99 |
| Q78PY7 | Staphylococcal nuclease domain-containing protein 1             | 0,8911 | 0,90 |
| Q8CGK3 | Lon protease homolog, mitochondrial                             | 0,4517 | 1,47 |
| Q8BTY1 | Kynurenine--oxoglutarate transaminase 1                         | 0,5791 | 0,76 |
| Q9DCG6 | Phenazine biosynthesis-like domain-containing protein 1         | 0,4847 | 0,75 |
| P62754 | 40S ribosomal protein S6                                        | 0,9155 | 1,06 |
| Q8C7R4 | Ubiquitin-like modifier-activating enzyme 6                     | 0,9673 | 0,98 |
| Q6ZQM8 | UDP-glucuronosyltransferase 1-7C                                | 0,9855 | 1,01 |
| Q9R0X4 | Acyl-coenzyme A thioesterase 9, mitochondrial                   | 0,8014 | 1,45 |
| Q60864 | Stress-induced-phosphoprotein 1                                 | 0,8859 | 1,11 |
| Q61792 | LIM and SH3 domain protein 1                                    | 0,6583 | 0,71 |
| Q9DC07 | LIM zinc-binding domain-containing Nebulette                    | 0,1406 | 0,51 |
| O35226 | 26S proteasome non-ATPase regulatory subunit 4                  | 0,7700 | 0,84 |
| P82343 | N-acetylglucosamine 2-epimerase                                 | 0,4700 | 0,55 |
| Q60972 | Histone-binding protein RBBP4                                   | 0,4291 | 0,90 |
| P40936 | Indolethylamine N-methyltransferase                             | 0,4517 | 0,85 |
| Q9ZON1 | Eukaryotic translation initiation factor 2 subunit 3, X-linked  | 0,9380 | 1,06 |
| Q9WU84 | Copper chaperone for superoxide dismutase                       | 0,7463 | 1,11 |
| Q9Z219 | Succinate--CoA ligase [ADP-forming] subunit beta, mitochondrial | 0,8943 | 0,96 |
| P02104 | Hemoglobin subunit epsilon-Y2                                   | 0,7512 | 1,01 |



|        |                                                                  |        |      |
|--------|------------------------------------------------------------------|--------|------|
| Q9CYN2 | Signal peptidase complex subunit 2                               | 0,7260 | 0,67 |
| Q9WTP6 | Adenylate kinase 2, mitochondrial                                | 0,3864 | 1,50 |
| P62245 | 40S ribosomal protein S15a                                       | 0,6127 | 0,97 |
| Q9CXW4 | 60S ribosomal protein L11                                        | 0,7049 | 1,10 |
| P83882 | 60S ribosomal protein L36a                                       | 0,1018 | 0,76 |
| Q8KOD5 | Elongation factor G, mitochondrial                               | 0,8853 | 1,11 |
| P14211 | Calreticulin                                                     | 0,0951 | 0,76 |
| O08677 | Kininogen-1                                                      | 0,4013 | 1,34 |
| Q9DBG3 | AP-2 complex subunit beta                                        | 0,8004 | 0,83 |
| Q9JK81 | UPF0160 protein MYG1, mitochondrial                              | 0,4088 | 0,68 |
| Q9CWS0 | N(G),N(G)-dimethylarginine dimethylaminohydrolase 1              | 0,9108 | 1,06 |
| Q99K51 | Plastin-3                                                        | 0,8875 | 1,23 |
| P05201 | Aspartate aminotransferase, cytoplasmic                          | 0,8501 | 1,02 |
| Q8BH86 | UPF0317 protein C14orf159 homolog, mitochondrial                 | 0,7480 | 0,88 |
| P68134 | Actin, alpha skeletal muscle                                     | 0,8813 | 0,85 |
| P41216 | Long-chain-fatty-acid-CoA ligase 1                               | 0,6941 | 1,35 |
| P13020 | Gelsolin                                                         | 0,8467 | 0,87 |
| P38647 | Stress-70 protein, mitochondrial                                 | 0,8771 | 1,11 |
| O88342 | WD repeat-containing protein 1                                   | 0,5322 | 0,87 |
| Q8VEM8 | Phosphate carrier protein, mitochondrial                         | 0,8536 | 1,03 |
| P14115 | 60S ribosomal protein L27a                                       | 0,5349 | 0,74 |
| Q9DCD0 | 6-phosphogluconate dehydrogenase, decarboxylating                | 0,9856 | 1,01 |
| POC1Q2 | Dual 3',5'-cyclic-AMP and -GMP phosphodiesterase 11A             | 0,7868 | 0,96 |
| Q9ROQ7 | Prostaglandin E synthase 3                                       | 0,7841 | 0,95 |
| Q9Z2V4 | Phosphoenolpyruvate carboxykinase, cytosolic [GTP]               | 0,3361 | 0,63 |
| Q9R1P1 | Proteasome subunit beta type-3                                   | 0,6709 | 0,70 |
| P62821 | Ras-related protein Rab-1A                                       | 0,8510 | 1,15 |
| A2AS89 | Agmatinase, mitochondrial                                        | 0,5769 | 0,77 |
| Q8VDK1 | Nitrilase homolog 1                                              | 0,5778 | 0,62 |
| Q60825 | Sodium-dependent phosphate transport protein 2A                  | 0,2962 | 0,92 |
| Q9R1P3 | Proteasome subunit beta type-2                                   | 1,0000 | 1,00 |
| O55222 | Integrin-linked protein kinase                                   | 0,1169 | 0,75 |
| P49222 | Erythrocyte membrane protein band 4,2                            | 0,5360 | 0,53 |
| Q9CYR6 | Phosphoacetylglucosamine mutase                                  | 0,3248 | 0,64 |
| Q9DOK2 | Succinyl-CoA:3-ketoacid coenzyme A transferase 1, mitochondrial  | 0,1125 | 1,17 |
| P50516 | V-type proton ATPase catalytic subunit A                         | 0,0654 | 1,35 |
| Q9D8I3 | Glyoxalase domain-containing protein 5                           | 0,0877 | 0,58 |
| Q8R3P0 | Aspartoacylase                                                   | 0,2681 | 0,61 |
| Q8BP40 | Lysophosphatidic acid phosphatase type 6                         | 0,9586 | 1,01 |
| Q9CR09 | Ubiquitin-fold modifier-conjugating enzyme 1                     | 0,9086 | 0,92 |
| Q9CZU6 | Citrate synthase, mitochondrial                                  | 0,5068 | 1,11 |
| O55142 | 60S ribosomal protein L35a                                       | 0,2857 | 1,10 |
| Q9DCQ2 | Putative L-aspartate dehydrogenase                               | 0,8267 | 0,96 |
| Q9QYJ0 | DnaJ homolog subfamily A member 2                                | 0,2305 | 0,58 |
| Q8VI36 | Paxillin                                                         | 0,6559 | 0,78 |
| P60867 | 40S ribosomal protein S20                                        | 0,8140 | 0,97 |
| Q64727 | Vinculin                                                         | 0,9888 | 0,98 |
| Q8BG05 | Heterogeneous nuclear ribonucleoprotein A3                       | 0,1312 | 1,24 |
| Q3UEG6 | Alanine-glyoxylate aminotransferase 2, mitochondrial             | 0,8111 | 1,10 |
| O35459 | Delta(3,5)-Delta(2,4)-dienoyl-CoA isomerase, mitochondrial       | 0,0560 | 0,70 |
| Q9QX96 | Sal-like protein 2                                               | 0,9658 | 0,94 |
| P11862 | Growth arrest-specific protein 2                                 | 0,3754 | 1,18 |
| P16381 | Putative ATP-dependent RNA helicase PI10                         | 0,8353 | 0,74 |
| Q5PT54 | Sodium/bile acid cotransporter 5                                 | 0,9635 | 1,07 |
| Q78KK3 | Solute carrier family 22 member 18                               | 0,9891 | 1,01 |
| Q61543 | Golgi apparatus protein 1                                        | 0,7900 | 1,47 |
| Q99MR8 | Methylcrotonoyl-CoA carboxylase subunit alpha, mitochondrial     | 0,8687 | 1,08 |
| P62141 | Serine/threonine-protein phosphatase PP1-beta catalytic subunit  | 0,9635 | 0,94 |
| P62137 | Serine/threonine-protein phosphatase PP1-alpha catalytic subunit | 0,9635 | 0,94 |
| P63087 | Serine/threonine-protein phosphatase PP1-gamma catalytic subunit | 0,9635 | 0,94 |
| P35802 | Neuronal membrane glycoprotein M6-a                              | 0,6072 | 0,59 |
| P35803 | Neuronal membrane glycoprotein M6-b                              | 0,6072 | 0,59 |
| Q81110 | ATP synthase mitochondrial F1 complex assembly factor 1          | 0,9608 | 1,07 |
| O54749 | Cytochrome P450 2J5                                              | 0,9608 | 1,07 |
| Q91WT9 | Cystathionine beta-synthase                                      | 0,7525 | 1,39 |
| Q91ZN5 | Adenosine 3'-phospho 5'-phosphosulfate transporter 1             | 0,1058 | 0,77 |
| O09061 | Proteasome subunit beta type-1                                   | 0,3224 | 0,82 |
| Q9WUU7 | Cathepsin Z                                                      | 0,9506 | 0,97 |
| Q8BK29 | Pyruvate dehydrogenase protein X component, mitochondrial        | 1,0000 | 1,00 |
| P23116 | Eukaryotic translation initiation factor 3 subunit A             | 0,8998 | 0,84 |

|        |                                                                  |        |      |
|--------|------------------------------------------------------------------|--------|------|
| P62984 | Ubiquitin-60S ribosomal protein L40                              | 0,3941 | 0,93 |
| Q8BZN6 | Dedicator of cytokinesis protein 10                              | 0,8203 | 0,98 |
| Q78JT3 | 3-hydroxyanthranilate 3,4-dioxygenase                            | 0,5501 | 0,89 |
| Q9QXB9 | Developmentally-regulated GTP-binding protein 2                  | 0,5490 | 0,54 |
| O35286 | Pre-mRNA-splicing factor ATP-dependent RNA helicase DHX15        | 0,9697 | 0,95 |
| Q9D939 | Sulfotransferase 1C2                                             | 0,3854 | 0,59 |
| P28843 | Dipeptidyl peptidase 4                                           | 0,5855 | 1,34 |
| Q9DB29 | Isoamyl acetate-hydrolyzing esterase 1 homolog                   | 0,3184 | 0,72 |
| Q8BXX2 | Zinc finger and BTB domain-containing protein 49                 | 0,9317 | 0,94 |
| Q9ERD7 | Tubulin beta-3 chain                                             | 0,9572 | 0,94 |
| P58044 | Isopentenyl-diphosphate Delta-isomerase 1                        | 0,9541 | 1,04 |
| P24527 | Leukotriene A-4 hydrolase                                        | 0,4873 | 0,70 |
| P45377 | Aldose reductase-related protein 2                               | 0,7421 | 0,69 |
| P16331 | Phenylalanine-4-hydroxylase                                      | 0,6347 | 0,76 |
| Q8C0M9 | Isoaspartyl peptidase/L-asparaginase                             | 0,8179 | 1,23 |
| Q6ZWU9 | 40S ribosomal protein S27                                        | 0,5861 | 0,76 |
| P97823 | Acyl-protein thioesterase 1                                      | 0,9795 | 0,98 |
| Q8BVI4 | Dihydropteridine reductase                                       | 0,7111 | 0,67 |
| Q9D8X1 | Copper homeostasis protein cutC homolog                          | 0,7540 | 0,77 |
| P35486 | Pyruvate dehydrogenase E1 component subunit alpha, somatic form, | 0,8533 | 0,82 |
| Q62167 | ATP-dependent RNA helicase DDX3X                                 | 0,8748 | 0,79 |
| Q8VHQ9 | Acyl-coenzyme A thioesterase 11                                  | 0,7288 | 0,69 |
| A2AJL3 | FGGY carbohydrate kinase domain-containing protein               | 0,6313 | 0,74 |
| Q9JLZ3 | Methylglutaconyl-CoA hydratase, mitochondrial                    | 0,7742 | 0,80 |
| P31254 | Ubiquitin-like modifier-activating enzyme 1 Y                    | 0,7148 | 1,32 |
| Q9CZR8 | Elongation factor Ts, mitochondrial                              | 0,7308 | 0,75 |
| Q7TMR0 | Lysosomal Pro-X carboxypeptidase                                 | 0,9576 | 0,93 |
| Q8KOH1 | Multidrug and toxin extrusion protein 1                          | 0,1919 | 0,55 |
| P15947 | Kallikrein-1                                                     | 0,9477 | 0,93 |
| Q80W21 | Glutathione S-transferase Mu 7                                   | 0,7984 | 0,76 |
| P15626 | Glutathione S-transferase Mu 2                                   | 0,7873 | 1,49 |
| P19639 | Glutathione S-transferase Mu 3                                   | 0,5979 | 0,56 |
| Q99JW4 | LIM and senescent cell antigen-like-containing domain protein 1  | 0,8712 | 0,79 |
| P62196 | 26S protease regulatory subunit 8                                | 0,8655 | 1,28 |
| Q3UFF7 | Lysophospholipase-like protein 1                                 | 0,4086 | 0,69 |
| Q8BP67 | 60S ribosomal protein L24                                        | 1,0000 | 1,00 |
| Q9QXW9 | Large neutral amino acids transporter small subunit 2            | 0,8716 | 1,13 |
| Q61165 | Sodium/hydrogen exchanger 1                                      | 0,9649 | 1,03 |
| Q9D819 | Inorganic pyrophosphatase                                        | 0,9881 | 1,02 |
| Q60648 | Ganglioside GM2 activator                                        | 0,5804 | 0,55 |
| P11103 | Poly [ADP-ribose] polymerase 1                                   | 1,0000 | 1,00 |
| Q9QUR7 | Peptidyl-prolyl cis-trans isomerase NIMA-interacting 1           | 1,0000 | 1,00 |
| O35961 | Submaxillary gland androgen-regulated protein 2, isoform epsilon | 0,9359 | 1,12 |
| O35982 | Submaxillary gland androgen-regulated protein 2, isoform beta    | 0,9359 | 1,12 |
| Q0VBB0 | PRELI domain-containing protein 2                                | 0,9359 | 1,12 |
| Q05922 | Dual specificity protein phosphatase 2                           | 1,0000 | 1,00 |
| Q8CDN6 | Thioredoxin-like protein 1                                       | 0,7247 | 0,76 |
| P61080 | Ubiquitin-conjugating enzyme E2 D1                               | 0,5330 | 0,58 |
| O55137 | Acyl-coenzyme A thioesterase 1                                   | 0,5768 | 0,62 |
| P49282 | Natural resistance-associated macrophage protein 2               | 0,9063 | 0,84 |
| P48774 | Glutathione S-transferase Mu 5                                   | 0,9939 | 1,01 |
| P63037 | DnaJ homolog subfamily A member 1                                | 0,9605 | 0,95 |
| P17879 | Heat shock 70 kDa protein 1B                                     | 0,9829 | 1,03 |
| Q91WU5 | Arsenite methyltransferase                                       | 0,8341 | 0,73 |
| Q99L04 | Dehydrogenase/reductase SDR family member 1                      | 0,9555 | 1,08 |
| P62835 | Ras-related protein Rap-1A                                       | 0,8693 | 1,27 |
| Q9QYC0 | Alpha-adducin                                                    | 0,9466 | 1,10 |
| P61161 | Actin-related protein 2                                          | 0,8546 | 1,30 |
| Q9CQ88 | Tetraspanin-31                                                   | 0,6979 | 0,54 |
| Q8VHF2 | Cadherin-related family member 5                                 | 0,6608 | 0,64 |
| P68033 | Actin, alpha cardiac muscle 1                                    | 0,6396 | 0,62 |
| Q8R1B4 | Eukaryotic translation initiation factor 3 subunit C             | 0,8026 | 0,69 |
| Q8BV79 | TPR and ankyrin repeat-containing protein 1                      | 0,9635 | 0,94 |
| O70305 | Ataxin-2                                                         | 0,6779 | 0,52 |
| Q9ROM5 | Thiamin pyrophosphokinase 1                                      | 0,6642 | 0,51 |
| Q9QZD9 | Eukaryotic translation initiation factor 3 subunit I             | 0,7859 | 0,67 |
| Q8BQ33 | Treslin                                                          | 1,0000 | 1,00 |
| Q7TMA4 | Free fatty acid receptor 4                                       | 0,9378 | 0,90 |
| Q64028 | Polyhomeotic-like protein 1                                      | 1,0000 | 1,00 |
| Q9WVP9 | Interferon-induced GTP-binding protein Mx2                       | 1,0000 | 1,00 |

|        |                                                                  |        |      |
|--------|------------------------------------------------------------------|--------|------|
| P16460 | Argininosuccinate synthase                                       | 0,5821 | 1,15 |
| O35215 | D-dopachrome decarboxylase                                       | 0,8093 | 0,96 |
| P47199 | Quinone oxidoreductase                                           | 0,6442 | 1,09 |
| Q9R0P3 | S-formylglutathione hydrolase                                    | 0,2617 | 0,81 |
| P17182 | Alpha-enolase                                                    | 0,1581 | 0,80 |
| Q61171 | Peroxiredoxin-2                                                  | 0,2616 | 0,73 |
| P17563 | Selenium-binding protein 1                                       | 0,0867 | 1,22 |
| Q63836 | Selenium-binding protein 2                                       | 0,8796 | 1,26 |
| P68368 | Tubulin alpha-4A chain                                           | 0,2177 | 1,24 |
| P68369 | Tubulin alpha-1A chain                                           | 0,1456 | 1,90 |
| P17751 | Triosephosphate isomerase                                        | 0,1272 | 1,69 |
| Q6PIE5 | Sodium/potassium-transporting ATPase subunit alpha-2             | 0,0295 | 1,71 |
| Q8VCT3 | Aminopeptidase B                                                 | 0,0747 | 0,29 |
| Q91YR9 | Prostaglandin reductase 1                                        | 0,4066 | 0,41 |
| Q9D1Q6 | Endoplasmic reticulum resident protein 44                        | 0,4520 | 0,45 |
| Q9CXN7 | Phenazine biosynthesis-like domain-containing protein 2          | 0,0814 | 0,35 |
| Q8BGA8 | Acyl-coenzyme A synthetase ACSM5, mitochondrial                  | 0,5011 | 0,44 |
| Q62470 | Integrin alpha-3                                                 | 0,3615 | 0,35 |
| Q49B93 | Sodium-coupled monocarboxylate transporter 2                     | 0,1316 | 0,34 |
| P16546 | Spectrin alpha chain, non-erythrocytic 1                         | 0,1084 | 0,34 |
| Q61699 | Heat shock protein 105 kDa                                       | 0,0389 | 0,49 |
| Q9D8N0 | Elongation factor 1-gamma                                        | 0,2217 | 0,22 |
| Q8VCM7 | Fibrinogen gamma chain                                           | 0,2750 | 0,29 |
| Q9R0N0 | Galactokinase                                                    | 0,3404 | 0,33 |
| P20918 | Plasminogen                                                      | 0,2208 | 0,40 |
| Q8CIE6 | Coatomer subunit alpha                                           | 0,0140 | 0,39 |
| Q62433 | Protein NDRG1                                                    | 0,6368 | 0,49 |
| Q9DC51 | Guanine nucleotide-binding protein G(k) subunit alpha            | 0,4915 | 0,48 |
| P01942 | Hemoglobin subunit alpha                                         | 0,0255 | 0,23 |
| P17156 | Heat shock-related 70 kDa protein 2                              | 0,1615 | 0,38 |
| Q8VCN5 | Cystathionine gamma-lyase                                        | 0,0880 | 0,32 |
| P63168 | Dynein light chain 1, cytoplasmic                                | 0,3552 | 0,35 |
| Q9D1G1 | Ras-related protein Rab-1B                                       | 0,1228 | 0,35 |
| Q91VC4 | Plasmalemma vesicle-associated protein                           | 0,2285 | 0,21 |
| P62878 | E3 ubiquitin-protein ligase RBX1                                 | 0,3137 | 0,33 |
| Q99PL5 | Ribosome-binding protein 1                                       | 0,0234 | 0,18 |
| Q8VDM6 | Heterogeneous nuclear ribonucleoprotein U-like protein 1         | 0,0429 | 0,23 |
| P00342 | L-lactate dehydrogenase C chain                                  | 0,1969 | 0,38 |
| Q9DCU9 | 4-hydroxy-2-oxoglutarate aldolase, mitochondrial                 | 0,1860 | 0,39 |
| Q9QZD8 | Mitochondrial dicarboxylate carrier                              | 0,2499 | 0,44 |
| P61759 | Prefoldin subunit 3                                              | 0,4554 | 0,46 |
| P80316 | T-complex protein 1 subunit epsilon                              | 0,3552 | 0,37 |
| Q8K010 | 5-oxoprolinase                                                   | 0,0275 | 0,20 |
| O70456 | 14-3-3 protein sigma                                             | 0,3768 | 0,39 |
| P35276 | Ras-related protein Rab-3D                                       | 0,0940 | 0,33 |
| Q9WTI7 | Unconventional myosin-Ic                                         | 0,5994 | 0,41 |
| Q9JHI5 | Isovaleryl-CoA dehydrogenase, mitochondrial                      | 0,1907 | 1,44 |
| P62631 | Elongation factor 1-alpha 2                                      | 0,8276 | 1,38 |
| P63017 | Heat shock cognate 71 kDa protein                                | 0,2978 | 1,15 |
| P05214 | Tubulin alpha-3 chain                                            | 0,6506 | 0,62 |
| P21550 | Beta-enolase                                                     | 0,0660 | 0,75 |
| P17183 | Gamma-enolase                                                    | 0,6711 | 0,71 |
| Q6PIC6 | Sodium/potassium-transporting ATPase subunit alpha-3             | 0,1404 | 2,11 |
| E9Q5G7 | Oogenesis-1                                                      | 0,4962 | 0,50 |
| Q9Z1F9 | SUMO-activating enzyme subunit 2                                 | 0,2690 | 0,29 |
| P20060 | Beta-hexosaminidase subunit beta                                 | 0,0256 | 0,22 |
| Q80V42 | Carboxypeptidase M                                               | 0,4211 | 0,44 |
| Q64337 | Sequestosome-1                                                   | 0,0478 | 0,22 |
| P62880 | Guanine nucleotide-binding protein G(I)/G(S)/G(T) subunit beta-2 | 0,4514 | 0,18 |
| P01738 | T-cell receptor alpha chain V region PHDSS8                      | 0,1307 | 0,37 |
| Q9JJ00 | Phospholipid scramblase 1                                        | 0,3882 | 0,35 |
| Q9EPE9 | Manganese-transporting ATPase 13A1                               | 0,3560 | 0,38 |
| P02089 | Hemoglobin subunit beta-2                                        | 0,0024 | 0,00 |
| Q8CHR6 | Dihydropyrimidine dehydrogenase [NADP(+)]                        | 0,0037 | 0,00 |
| Q9EQ06 | Estradiol 17-beta-dehydrogenase 11                               | 0,1853 | 0,02 |
| Q8VDZ4 | Palmitoyltransferase ZDHHC5                                      | 0,0031 | 0,01 |
| Q5SW19 | Clustered mitochondria protein homolog                           | 0,3739 | 0,04 |
| O89013 | Leptin receptor gene-related protein                             | 0,0001 | 0,01 |
| P70441 | Na(+)/H(+) exchange regulatory cofactor NHE-RF1                  | 0,2259 | 0,03 |
| Q924M7 | Mannose-6-phosphate isomerase                                    | 0,3739 | 0,04 |

|        |                                                                  |        |      |
|--------|------------------------------------------------------------------|--------|------|
| P15532 | Nucleoside diphosphate kinase A                                  | 0,3739 | 0,04 |
| Q6P3A8 | 2-oxoisovalerate dehydrogenase subunit beta, mitochondrial       | 0,1161 | 0,02 |
| Q9D7G0 | Ribose-phosphate pyrophosphokinase 1                             | 0,1221 | 0,03 |
| Q62095 | ATP-dependent RNA helicase DDX3Y                                 | 0,3739 | 0,05 |
| Q91V92 | ATP-citrate synthase                                             | 0,1264 | 0,03 |
| Q91VH6 | Protein MEMO1                                                    | 0,3739 | 0,05 |
| P52825 | Carnitine O-palmitoyltransferase 2, mitochondrial                | 0,3739 | 0,05 |
| P01029 | Complement C4-B                                                  | 0,1202 | 0,03 |
| Q9DCL9 | Multifunctional protein ADE2                                     | 0,3739 | 0,05 |
| P27601 | Guanine nucleotide-binding protein subunit alpha-13              | 0,0159 | 0,01 |
| Q8BP47 | Asparagine--tRNA ligase, cytoplasmic                             | 0,1161 | 0,03 |
| P04186 | Complement factor B                                              | 0,3739 | 0,06 |
| Q9ET30 | Transmembrane 9 superfamily member 3                             | 0,3739 | 0,06 |
| Q9DC04 | Regulator of G-protein signaling 3                               | 0,1161 | 0,03 |
| Q3V3R1 | Monofunctional C1-tetrahydrofolate synthase, mitochondrial       | 0,3739 | 0,06 |
| Q6IRU5 | Clathrin light chain B                                           | 0,3739 | 0,06 |
| O08585 | Clathrin light chain A                                           | 0,3739 | 0,06 |
| P01027 | Complement C3                                                    | 0,1180 | 0,03 |
| Q99LM2 | CDK5 regulatory subunit-associated protein 3                     | 0,3739 | 0,06 |
| P61514 | 60S ribosomal protein L37a                                       | 0,0001 | 0,02 |
| Q9CZM2 | 60S ribosomal protein L15                                        | 0,1161 | 0,04 |
| Q6DYE8 | Ectonucleotide pyrophosphatase/phosphodiesterase family member 3 | 0,0120 | 0,03 |
| Q9DCN1 | Peroxisomal NADH pyrophosphatase NUDT12                          | 0,1360 | 0,05 |
| P62267 | 40S ribosomal protein S23                                        | 0,0509 | 0,03 |
| Q9CWF2 | Tubulin beta-2B chain                                            | 0,1242 | 0,00 |
