# Supplementary material
Source: PubMed Central journal article supplement (PMC7196637)
Supplement: supp_RA119.011049_155803_2_supp_492023_q735ht.pdf [file supp_RA119.011049_155803_2_supp_492023_q735ht.pdf]

**Supplemental Table 2 List of identified S-palmitoylated roteins and corresponding S-palmitoylated-peptides from WT and DHHC7ko mouse kidneys with their characteristics.**

| Peptide sequence                      | Observed mass | Experimental mass | Charge state | Mascot score | SPROT accession number | PROTEIN NAME                                       |
|---------------------------------------|---------------|-------------------|--------------|--------------|------------------------|----------------------------------------------------|
| cVPSIFR + Carbamidomethyl (C)         | 877.448       | 877.4572          | 2            | 57.0         | A2ARV4                 | Low-density lipoprotein receptor-related protein 2 |
| HHTcYPR + Carbamidomethyl (C)         | 969.4239      | 969.4258          | +2;+3        | 40.0         | A2ARV4                 | Low-density lipoprotein receptor-related protein 2 |
| cVPYHYR + Carbamidomethyl (C)         | 993.4491      | 993.446           | +2;+3        | 41.0         | A2ARV4                 | Low-density lipoprotein receptor-related protein 2 |
| EcTESEFR + Carbamidomethyl (C)        | 1056.4182     | 1056.4205         | 2            | 60.0         | A2ARV4                 | Low-density lipoprotein receptor-related protein 2 |
| VcGcPYGMK + 2 Carbamidomethyl (C)     | 1138.461      | 1138.4683         | 2            | 50.0         | A2ARV4                 | Low-density lipoprotein receptor-related protein 2 |
| cDHKVDcR + 2 Carbamidomethyl (C)      | 1156.4754     | 1156.4829         | 3            | 30.0         | A2ARV4                 | Low-density lipoprotein receptor-related protein 2 |
| NDcGDYS DER + Carbamidomethyl (C)     | 1229.4255     | 1229.4247         | 2            | 65.0         | A2ARV4                 | Low-density lipoprotein receptor-related protein 2 |
| cQTTNcVPR + 2 Carbamidomethyl (C)     | 1247.5751     | 1315.6097         | 2            | 90.0         | A2ARV4                 | Low-density lipoprotein receptor-related protein 2 |
| cADGSScINSR + 2 Carbamidomethyl (C)   | 1293.5078     | 1293.514          | 2            | 80.0         | A2ARV4                 | Low-density lipoprotein receptor-related protein 2 |
| cADQQcIPSR + 2 Carbamidomethyl (C)    | 1301.5493     | 1301.5549         | 2            | 84.0         | A2ARV4                 | Low-density lipoprotein receptor-related protein 2 |
| cGNHHcIPLR + 2 Carbamidomethyl (C)    | 1330.6023     | 1330.6076         | +2;+3        | 48.0         | A2ARV4                 | Low-density lipoprotein receptor-related protein 2 |
| cAPGYIREPDGK + Carbamidomethyl (C)    | 1361.6398     | 1361.6536         | +2;+3        | 39.0         | A2ARV4                 | Low-density lipoprotein receptor-related protein 2 |
| RNDcGDYS DER + Carbamidomethyl (C)    | 1385.5266     | 1385.5378         | +2;+3        | 70.0         | A2ARV4                 | Low-density lipoprotein receptor-related protein 2 |
| AcSTGEFScANGR + 2 Carbamidomethyl (C) | 1483.582      | 1483.6011         | 2            | 108.0        | A2ARV4                 | Low-density lipoprotein receptor-related protein 2 |
| cEANEWQcANKR + 2 Carbamidomethyl (C)  | 1632.6773     | 1632.6906         | +2;+3        | 90.0         | A2ARV4                 | Low-density lipoprotein receptor-related protein 2 |

|                                                       |           |           |          |       |        |                                                    |
|-------------------------------------------------------|-----------|-----------|----------|-------|--------|----------------------------------------------------|
| TcRPGQFKcNNGR + 2 Carbamidomethyl (C)                 | 1661.7515 | 1661.7688 | +2;+3;+4 | 65.0  | A2ARV4 | Low-density lipoprotein receptor-related protein 2 |
| cDHVSDcPDGSDER + 2 Carbamidomethyl (C)                | 1715.6152 | 1715.6352 | +2;+3    | 104.0 | A2ARV4 | Low-density lipoprotein receptor-related protein 2 |
| DcSDGSDESdLcPHR + 2 Carbamidomethyl (C)               | 1816.6629 | 1816.6709 | +2;+3    | 114.0 | A2ARV4 | Low-density lipoprotein receptor-related protein 2 |
| QDcADGSDEdRVLcEHHR + 2 Carbamidomethyl (C)            | 2265.9127 | 2197.8935 | +3;+4    | 60.0  | A2ARV4 | Low-density lipoprotein receptor-related protein 2 |
| GcSYPPcRDDQFTcQNGQcITK + 4 Carbamidomethyl (C)        | 2895.1721 | 2895.2127 | 3        | 47.0  | A2ARV4 | Low-density lipoprotein receptor-related protein 2 |
| QPSSPNPcASATcSHLcLLSAQEP R + 3 Carbamidomethyl (C)    | 2903.3    | 2767.2656 | 3        | 85.0  | A2ARV4 | Low-density lipoprotein receptor-related protein 2 |
| clPEYWQcDSVDDcLDNSDED PSHcASR + 4 Carbamidomethyl (C) | 3633.3701 | 3633.4384 | 3        | 137.0 | A2ARV4 | Low-density lipoprotein receptor-related protein 2 |
| SLLHcFQccGAK + 3 Carbamidomethyl (C)                  | 1479.6421 | 1615.7112 | +2;+3    | 86.0  | O35488 | Very long-chain acyl-CoA synthetase                |
| AKSLLHcFQccGAK + 3 Carbamidomethyl (C)                | 1678.7742 | 1678.7887 | +2;+3;+4 | 104.0 | O35488 | Very long-chain acyl-CoA synthetase                |
| ScAAEDKATHPLPK + Carbamidomethyl (C)                  | 1523.7402 | 1523.7379 | 3        | 50.0  | Q9D964 | Glycine amidinotransferase, mitochondrial          |
| AENAcVPPFTVEVK + Carbamidomethyl (C)                  | 1559.7654 | 1559.7731 | 2        | 68.0  | Q9D964 | Glycine amidinotransferase, mitochondrial          |
| NScAAEDKATHPLPK + Carbamidomethyl (C)                 | 1637.7831 | 1637.7939 | +2;+3;+4 | 104.0 | Q9D964 | Glycine amidinotransferase, mitochondrial          |
| NANSLGGGFHcWTcDVR + 2 Carbamidomethyl (C)             | 2017.8523 | 2017.8682 | +2;+3    | 135.0 | Q9D964 | Glycine amidinotransferase, mitochondrial          |
| FVTTEFEPCFDAADFI R + Carbamidomethyl (C)              | 2063.9299 | 2063.9552 | +2;+3    | 115.0 | Q9D964 | Glycine amidinotransferase, mitochondrial          |
| NANSLGGGFHcWTcDVRR + 2 Carbamidomethyl (C)            | 2105.9272 | 2173.9795 | +2;+3;+4 | 84.0  | Q9D964 | Glycine amidinotransferase, mitochondrial          |
| DcPVSSYNEWDPLEEVI VGR + Carbamidomethyl (C)           | 2363.074  | 2363.0936 | +2;+3    | 157.0 | Q9D964 | Glycine amidinotransferase, mitochondrial          |

|                                     |           |           |       |      |                                    |                                                                                                                                                                                                                                                                 |
|-------------------------------------|-----------|-----------|-------|------|------------------------------------|-----------------------------------------------------------------------------------------------------------------------------------------------------------------------------------------------------------------------------------------------------------------|
| IAGLcNR + Carbamidomethyl (C)       | 802.4119  | 802.4129  | 2     | 53.0 | Q8VDN2,Q6PIE5,Q6PIC6,Q9WV27        | Sodium/potassium-transporting ATPase subunit alpha-1,Sodium/potassium-transporting ATPase subunit alpha-2,Sodium/potassium-transporting ATPase subunit alpha-3,Sodium/potassium-transporting ATPase subunit alpha-4                                             |
| IISANGcK + Carbamidomethyl (C)      | 861.4378  | 861.4435  | 2     | 63.0 | Q8VDN2                             | Sodium/potassium-transporting ATPase subunit alpha-1                                                                                                                                                                                                            |
| AcVVHGSDLK + Carbamidomethyl (C)    | 1084.5335 | 1084.5404 | +2;+3 | 88.0 | Q8VDN2,Q6PIE5                      | Sodium/potassium-transporting ATPase subunit alpha-1,Sodium/potassium-transporting ATPase subunit alpha-2                                                                                                                                                       |
| LIIVEGcQR + Carbamidomethyl (C)     | 1086.5856 | 1086.5972 | 2     | 77.0 | Q8VDN2,Q6PIE5,Q6PIC6,Q9WV27,Q9Z1W8 | Sodium/potassium-transporting ATPase subunit alpha-1,Sodium/potassium-transporting ATPase subunit alpha-2,Sodium/potassium-transporting ATPase subunit alpha-3,Sodium/potassium-transporting ATPase subunit alpha-4,Potassium-transporting ATPase alpha chain 2 |
| AAVPDAVGKcR + Carbamidomethyl (C)   | 1142.5866 | 1142.5896 | +2;+3 | 80.0 | Q8VDN2,Q6PIE5,Q6PIC6               | Sodium/potassium-transporting ATPase subunit alpha-1,Sodium/potassium-transporting ATPase subunit alpha-2,Sodium/potassium-transporting ATPase subunit alpha-3                                                                                                  |
| DAKAcVVHGSDLK + Carbamidomethyl (C) | 1398.6926 | 1398.7023 | 2     | 62.0 | Q8VDN2                             | Sodium/potassium-transporting ATPase subunit alpha-1                                                                                                                                                                                                            |
| ILDRcSILLHGK + Carbamidomethyl (C)  | 1510.829  | 1510.8333 | +3;+4 | 54.0 | Q8VDN2                             | Sodium/potassium-transporting ATPase subunit alpha-1                                                                                                                                                                                                            |

|                                                      |           |           |          |       |                                      |                                                                                                                                                                                                                                                                 |
|------------------------------------------------------|-----------|-----------|----------|-------|--------------------------------------|-----------------------------------------------------------------------------------------------------------------------------------------------------------------------------------------------------------------------------------------------------------------|
| AVFQANQENLPILKR                                      | 1739.9682 | 1739.9869 | 3        | 91.0  | Q8VDN2                               | Sodium/potassium-transporting ATPase subunit alpha-1                                                                                                                                                                                                            |
| TSPQQLIIVEGcQR + Carbamidomethyl (C)                 | 1755.9301 | 1755.9486 | 3        | 76.0  | Q8VDN2,Q6PIE5, Q6PIC6,Q9WV27, Q9Z1W8 | Sodium/potassium-transporting ATPase subunit alpha-1,Sodium/potassium-transporting ATPase subunit alpha-2,Sodium/potassium-transporting ATPase subunit alpha-3,Sodium/potassium-transporting ATPase subunit alpha-4,Potassium-transporting ATPase alpha chain 2 |
| IISANGcKVDNSSLTGESEPQTR + Carbamidomethyl (C)        | 2462.1707 | 2462.1894 | 3        | 120.0 | Q8VDN2                               | Sodium/potassium-transporting ATPase subunit alpha-1                                                                                                                                                                                                            |
| AcVVHGSDLKDMTSEELDDILR + Carbamidomethyl (C)         | 2502.173  | 2502.1984 | +2;+3;+4 | 123.0 | Q8VDN2                               | Sodium/potassium-transporting ATPase subunit alpha-1                                                                                                                                                                                                            |
| SPDFTNENPLETRNIAFFSTNcV EGTAR + Carbamidomethyl (C)  | 3186.4676 | 3186.5002 | 3        | 116.0 | Q8VDN2                               | Sodium/potassium-transporting ATPase subunit alpha-1                                                                                                                                                                                                            |
| TSYPDcIK + Carbamidomethyl (C)                       | 982.443   | 982.4518  | 2        | 53.0  | Q92111                               | Serotransferrin                                                                                                                                                                                                                                                 |
| KScHTGLGR + Carbamidomethyl (C)                      | 1014.5029 | 1014.5044 | +2;+3    | 68.0  | Q92111                               | Serotransferrin                                                                                                                                                                                                                                                 |
| LLEAcTFHKH + Carbamidomethyl (C)                     | 1254.6179 | 1254.6212 | +2;+3;+4 | 82.0  | Q92111                               | Serotransferrin                                                                                                                                                                                                                                                 |
| WcAVSEHENTK + Carbamidomethyl (C)                    | 1359.5877 | 1359.5917 | +2;+3    | 72.0  | Q92111                               | Serotransferrin                                                                                                                                                                                                                                                 |
| cLVEKGDVAFVK + Carbamidomethyl (C)                   | 1363.717  | 1363.7302 | +2;+3    | 100.0 | Q92111                               | Serotransferrin                                                                                                                                                                                                                                                 |
| SAGWVIPIGLLFcK + Carbamidomethyl (C)                 | 1559.8534 | 1559.8733 | 2        | 39.0  | Q92111                               | Serotransferrin                                                                                                                                                                                                                                                 |
| KPVDQYEDcYLAR + Carbamidomethyl (C)                  | 1655.7613 | 1655.7839 | +2;+3    | 101.0 | Q92111                               | Serotransferrin                                                                                                                                                                                                                                                 |
| AVSSFFSGScVPcADPVAfPK + 2 Carbamidomethyl (C)        | 2297.0497 | 2297.082  | +2;+3    | 93.0  | Q92111                               | Serotransferrin                                                                                                                                                                                                                                                 |
| KPVDQYEDcYLARIPSHAVVAR + Carbamidomethyl (C)         | 2586.3013 | 2586.3286 | +3;+4;+5 | 59.0  | Q92111                               | Serotransferrin                                                                                                                                                                                                                                                 |
| NQQEGVcPEGSIDNSPVKwCA LSHLER + 2 Carbamidomethyl (C) | 3109.4346 | 3177.4795 | +3;+4    | 109.0 | Q92111                               | Serotransferrin                                                                                                                                                                                                                                                 |
| ScNcLLLK + 2 Carbamidomethyl (C)                     | 1074.5202 | 1074.5322 | 2        | 58.0  | P17182                               | Alpha-enolase                                                                                                                                                                                                                                                   |
| FGANAILGVSLAVcK + Carbamidomethyl (C)                | 1518.8228 | 1518.8449 | 2        | 44.0  | P17182,P17183,P21550                 | Alpha-enolase,Gamma-enolase,Beta-enolase                                                                                                                                                                                                                        |
| ScNcLLLKVNIQSVTESLQAcK + 3 Carbamidomethyl (C)       | 2621.2975 | 2757.3639 | 3        | 141.0 | P17182                               | Alpha-enolase                                                                                                                                                                                                                                                   |

|                                                                 |           |           |          |       |        |                                  |
|-----------------------------------------------------------------|-----------|-----------|----------|-------|--------|----------------------------------|
| cFGGLQK + Carbamidomethyl (C)                                   | 808.3902  | 808.3977  | 2        | 48.0  | Q9R0P3 | S-formylglutathione hydrolase    |
| AYDATcLVK + Carbamidomethyl (C)                                 | 1039.5008 | 1039.5123 | 2        | 75.0  | Q9R0P3 | S-formylglutathione hydrolase    |
| cFGGLQKVFHSSVELK + Carbamidomethyl (C)                          | 1963.9826 | 1963.9997 | 3        | 83.0  | Q9R0P3 | S-formylglutathione hydrolase    |
| SVSAFAPicNPVLCswgk + 2 Carbamidomethyl (C)                      | 1991.9597 | 1991.9884 | +2;+3    | 99.0  | Q9R0P3 | S-formylglutathione hydrolase    |
| SVSAFAPicNPVLCswgk + 2 Carbamidomethyl (C)                      | 2188.0809 | 2188.1094 | +2;+3    | 108.0 | Q9R0P3 | S-formylglutathione hydrolase    |
| AYSGSQIDILIDQgkDDEFLSN<br>GQLLPDNFIAAcTEK + Carbamidomethyl (C) | 4084.9575 | 4085.0113 | +3;+4    | 108.0 | Q9R0P3 | S-formylglutathione hydrolase    |
| cPGSLPK + Carbamidomethyl (C)                                   | 757.3793  | 757.3845  | 2        | 46.0  | O09173 | Homogentisate 1,2-dioxygenase    |
| YAEQLSGSAFTcPR + Carbamidomethyl (C)                            | 1585.7195 | 1585.7296 | 2        | 65.0  | O09173 | Homogentisate 1,2-dioxygenase    |
| MSLQPNEicVIQR + Carbamidomethyl (C)                             | 1586.7909 | 1586.8054 | +2;+3    | 101.0 | O09173 | Homogentisate 1,2-dioxygenase    |
| YISGFGNEcASEDPR + Carbamidomethyl (C)                           | 1700.71   | 1700.7218 | 2        | 122.0 | O09173 | Homogentisate 1,2-dioxygenase    |
| cFYNSDGDFLVLPQK + Carbamidomethyl (C)                           | 1801.8345 | 1801.8478 | +2;+3    | 88.0  | O09173 | Homogentisate 1,2-dioxygenase    |
| KVDFVSGLYTLcGAGDIK + Carbamidomethyl (C)                        | 1941.987  | 1942.0013 | +2;+3    | 164.0 | O09173 | Homogentisate 1,2-dioxygenase    |
| YISGFGNEcASEDPRcPGSLPK + 2 Carbamidomethyl (C)                  | 2508.1049 | 2508.1373 | 3        | 94.0  | O09173 | Homogentisate 1,2-dioxygenase    |
| GQNNPQVcPYNLYAEQLSGSA<br>FTcPR + 2 Carbamidomethyl (C)          | 3038.3651 | 3038.3821 | +2;+3    | 137.0 | O09173 | Homogentisate 1,2-dioxygenase    |
| TFHETLNccGSNALTTLTTILR + 2 Carbamidomethyl (C)                  | 2691.2997 | 2623.2913 | +2;+3;+4 | 150.0 | P35762 | CD81 antigen                     |
| AVVKTFFHETLNccGSNALTTLT<br>TTILR + 2 Carbamidomethyl (C)        | 3020.5423 | 3088.609  | +3;+4    | 163.0 | P35762 | CD81 antigen                     |
| AMANcQAAQGQYVHTGSSG + Carbamidomethyl (C)                       | 1936.8156 | 1936.8362 | 2        | 73.0  | Q91Y97 | Fructose-bisphosphate aldolase B |
| IADQcPSSLAIQENANALAR + Carbamidomethyl (C)                      | 2141.0535 | 2141.0692 | +2;+3    | 161.0 | Q91Y97 | Fructose-bisphosphate aldolase B |
| AVLRIADQcPSSLAIQENANALAR + Carbamidomethyl (C)                  | 2580.3442 | 2580.3621 | 3        | 133.0 | Q91Y97 | Fructose-bisphosphate aldolase B |
| VVVVGcR + Carbamidomethyl (C)                                   | 787.4375  | 787.4439  | 2        | 47.0  | P47199 | Quinone oxidoreductase           |
| VHAcGVNPVETYIR + Carbamidomethyl (C)                            | 1613.7984 | 1613.8125 | +2;+3    | 104.0 | P47199 | Quinone oxidoreductase           |
| VVVVGcRGPiEINPR + Carbamidomethyl (C)                           | 1663.9192 | 1663.9287 | +2;+3    | 66.0  | P47199 | Quinone oxidoreductase           |
| AGESVLVHGASGGVGLATcQI<br>AR + Carbamidomethyl (C)               | 2209.1274 | 2209.1408 | +2;+3;+4 | 190.0 | P47199 | Quinone oxidoreductase           |
| ARAGESVLVHGASGGVGLATc<br>QIAR + Carbamidomethyl (C)             | 2436.2656 | 2436.2968 | +3;+4    | 121.0 | P47199 | Quinone oxidoreductase           |
| SALEHSVQcAVDVK + Carbamidomethyl (C)                            | 1541.7508 | 1541.7594 | +2;+3    | 99.0  | P24270 | Catalase                         |
| SALEHSVQcAVDVKR + Carbamidomethyl (C)                           | 1697.8519 | 1697.878  | +2;+3;+4 | 113.0 | P24270 | Catalase                         |
| LGPNYLQIPVncPYR + Carbamidomethyl (C)                           | 1802.9138 | 1802.9324 | +2;+3    | 96.0  | P24270 | Catalase                         |

|                                                           |           |           |          |       |                      |                                                                                                 |
|-----------------------------------------------------------|-----------|-----------|----------|-------|----------------------|-------------------------------------------------------------------------------------------------|
| LGPNYLQIPVNCpYRAR + Carbamidomethyl (C)                   | 2030.052  | 2030.0812 | +2;+3    | 67.0  | P24270               | Catalase                                                                                        |
| MAEHSHeSLGIK + Carbamidomethyl (C)                        | 1368.6278 | 1368.6413 | +2;+3;+4 | 93.0  | Q8K0L3               | Acyl-coenzyme A synthetase ACSM2, mitochondrial                                                 |
| EIYGQTETGLiCR + Carbamidomethyl (C)                       | 1538.7399 | 1538.7589 | 2        | 134.0 | Q8K0L3               | Acyl-coenzyme A synthetase ACSM2, mitochondrial                                                 |
| QTANVLSGAcGLHRGDR + Carbamidomethyl (C)                   | 1810.8857 | 1810.9014 | +2;+3;+4 | 61.0  | Q8K0L3               | Acyl-coenzyme A synthetase ACSM2, mitochondrial                                                 |
| EIYGQTETGLiCRVSR + Carbamidomethyl (C)                    | 1880.9414 | 1880.962  | +2;+3    | 63.0  | Q8K0L3               | Acyl-coenzyme A synthetase ACSM2, mitochondrial                                                 |
| ALLKEASTIHQcVETESR + Carbamidomethyl (C)                  | 2071.0368 | 2139.0874 | 3        | 73.0  | Q8K0L3               | Acyl-coenzyme A synthetase ACSM2, mitochondrial                                                 |
| AIVAGDEVAQEVDAPDcSFLKIK + Carbamidomethyl (C)             | 2712.368  | 2644.3744 | 3        | 137.0 | Q8K0L3               | Acyl-coenzyme A synthetase ACSM2, mitochondrial                                                 |
| GcDvVVIPAGVPR + Carbamidomethyl (C)                       | 1337.7126 | 1337.7192 | 2        | 89.0  | P08249               | Malate dehydrogenase, mitochondrial                                                             |
| GYLGPEQLPdCLK + Carbamidomethyl (C)                       | 1488.7283 | 1488.7415 | 2        | 79.0  | P08249               | Malate dehydrogenase, mitochondrial                                                             |
| ETeCYFSTPLLLGK + Carbamidomethyl (C)                      | 1757.8546 | 1757.8761 | +2;+3    | 100.0 | P08249               | Malate dehydrogenase, mitochondrial                                                             |
| ETeCYFSTPLLLGKK + Carbamidomethyl (C)                     | 1885.9495 | 1885.9751 | +2;+3    | 92.0  | P08249               | Malate dehydrogenase, mitochondrial                                                             |
| FVFSLVdAMNGKEGVVcSFVQSK + Carbamidomethyl (C)             | 2676.2928 | 2676.325  | 3        | 160.0 | P08249               | Malate dehydrogenase, mitochondrial                                                             |
| DYcVTANSK + Carbamidomethyl (C)                           | 1056.4546 | 1056.4573 | 2        | 62.0  | P06151               | L-lactate dehydrogenase A chain                                                                 |
| VIGSGcNLDsAR + Carbamidomethyl (C)                        | 1247.5928 | 1247.6041 | 2        | 109.0 | P06151,P16125,P00342 | L-lactate dehydrogenase A chain,L-lactate dehydrogenase B chain,L-lactate dehydrogenase C chain |
| VIGSGcNLDsARFR + Carbamidomethyl (C)                      | 1550.7624 | 1618.8088 | +2;+3    | 80.0  | P06151,P16125,P00342 | L-lactate dehydrogenase A chain,L-lactate dehydrogenase B chain,L-lactate dehydrogenase C chain |
| IVSSKDYcVTANSK + Carbamidomethyl (C)                      | 1570.7661 | 1570.7833 | +2;+3    | 125.0 | P06151               | L-lactate dehydrogenase A chain                                                                 |
| LGvHALScHGwVLGEHGdSSVPWwSGVNVAGVSLK + Carbamidomethyl (C) | 3609.8151 | 3609.8429 | +4;+5    | 80.0  | P06151               | L-lactate dehydrogenase A chain                                                                 |
| cSQAVYAAEK + Carbamidomethyl (C)                          | 1125.5124 | 1125.5115 | 2        | 87.0  | P97315               | Cysteine and glycine-rich protein 1                                                             |

|                                                                       |           |           |          |       |        |                                           |
|-----------------------------------------------------------------------|-----------|-----------|----------|-------|--------|-------------------------------------------|
| GLESTTLADKDGIEYcK + Carbamidomethyl (C)                               | 1898.8931 | 1898.9206 | +2;+3    | 124.0 | P97315 | Cysteine and glycine-rich protein 1       |
| NLDSTTVAVHGEEIYcK + Carbamidomethyl (C)                               | 1934.9044 | 1934.9196 | +2;+3    | 112.0 | P97315 | Cysteine and glycine-rich protein 1       |
| TVYFAEEVQcEGNSFHK + Carbamidomethyl (C)                               | 2043.8996 | 2043.9258 | 3        | 118.0 | P97315 | Cysteine and glycine-rich protein 1       |
| AAPLSLcALTAVDQSVLLKPEAK + Carbamidomethyl (C)                         | 2507.4033 | 2507.439  | +3;+4    | 124.0 | Q61838 | Pregnancy zone protein                    |
| VKAAPLSLcALTAVDQSVLLKPEAK + Carbamidomethyl (C)                       | 2734.5666 | 2734.5725 | +3;+4    | 154.0 | Q61838 | Pregnancy zone protein                    |
| VGAFTVVcK + Carbamidomethyl (C)                                       | 979.5161  | 979.5278  | 2        | 76.0  | P05202 | Aspartate aminotransferase, mitochondrial |
| VGAFTVVcKDAEEAK + Carbamidomethyl (C)                                 | 1622.7974 | 1622.8102 | +2;+3    | 128.0 | P05202 | Aspartate aminotransferase, mitochondrial |
| NLDKEYLPIGGLAEFcK + Carbamidomethyl (C)                               | 1965.987  | 1966.0138 | +2;+3    | 122.0 | P05202 | Aspartate aminotransferase, mitochondrial |
| TGNAGSRLAcGVIGIAQ + Carbamidomethyl (C)                               | 1643.8413 | 1643.8518 | 2        | 115.0 | P08228 | Superoxide dismutase [Cu-Zn]              |
| AVcVLKGDGPVQGTIHFEQK + Carbamidomethyl (C)                            | 2182.1205 | 2182.1588 | +2;+3;+4 | 127.0 | P08228 | Superoxide dismutase [Cu-Zn]              |
| SGQITGLTEGQHGFHVHQYGDNTQGcTSAGPHFNPHSK + Carbamidomethyl (C)          | 4087.8369 | 4087.8789 | +5;+6    | 41.0  | P08228 | Superoxide dismutase [Cu-Zn]              |
| ASGEPVVLGGQITGLTEGQHGFHVHQYGDNTQGcTSAGPHFNPHSK + Carbamidomethyl (C)  | 4840.2437 | 4840.2641 | +6;+7    | 57.0  | P08228 | Superoxide dismutase [Cu-Zn]              |
| ASGEPVVLGGQITGLTEGQHGFHVHQYGDNTQGcTSAGPHFNPHSKK + Carbamidomethyl (C) | 4968.3387 | 4968.4002 | +6;+7    | 59.0  | P08228 | Superoxide dismutase [Cu-Zn]              |
| IcKHPESNFCsR + 2 Carbamidomethyl (C)                                  | 1601.7079 | 1601.7164 | +2;+3;+4 | 79.0  | P00329 | Alcohol dehydrogenase 1                   |
| IDGASPLDKVcLIGcGFSTGYGS AVK + 2 Carbamidomethyl (C)                   | 2671.2986 | 2671.3294 | +2;+3    | 146.0 | P00329 | Alcohol dehydrogenase 1                   |
| TTIQGQEINAPicISPTAFHSIA WADGEK + Carbamidomethyl (C)                  | 3154.5393 | 3154.5835 | +2;+3;+4 | 160.0 | Q9NYQ2 | Hydroxyacid oxidase 2                     |
| TTIQGQEINAPicISPTAFHSIA WADGEKSTAK + Carbamidomethyl (C)              | 3541.7511 | 3541.7995 | +3;+4    | 168.0 | Q9NYQ2 | Hydroxyacid oxidase 2                     |
| TSLARPClAR + Carbamidomethyl (C)                                      | 1143.6182 | 1143.6297 | +2;+3    | 38.0  | P16460 | Argininosuccinate synthase                |
| FELTcYSLAPQIK + Carbamidomethyl (C)                                   | 1568.7908 | 1568.8129 | +2;+3    | 93.0  | P16460 | Argininosuccinate synthase                |
| GNDQVRFELTcYSLAPQIK + Carbamidomethyl (C)                             | 2238.1103 | 2238.1432 | +2;+3    | 101.0 | P16460 | Argininosuccinate synthase                |
| LSLPcILNAR + Carbamidomethyl (C)                                      | 1155.6434 | 1155.6528 | 2        | 67.0  | P16125 | L-lactate dehydrogenase B chain           |
| HRVIGSGcNLDsAR + Carbamidomethyl (C)                                  | 1540.7529 | 1540.7542 | +2;+3    | 73.0  | P16125 | L-lactate dehydrogenase B chain           |
| YSPDcTIIVVSNPVDILTYVTWKLSGLPK + Carbamidomethyl (C)                   | 3277.7308 | 3277.789  | 3        | 77.0  | P16125 | L-lactate dehydrogenase B chain           |

|                                                       |           |           |          |       |        |                                                                      |
|-------------------------------------------------------|-----------|-----------|----------|-------|--------|----------------------------------------------------------------------|
| AAVScLWGKVNSEVGGALGR + Carbamidomethyl (C)            | 2274.1063 | 2274.1442 | +2;+3    | 176.0 | P02088 | Hemoglobin subunit beta-1                                            |
| AScLPVYR + Carbamidomethyl (C)                        | 964.48    | 964.4888  | 2        | 77.0  | Q99LB7 | Sarcosine dehydrogenase, mitochondrial                               |
| GAQVIENcAVTGIR + Carbamidomethyl (C)                  | 1486.7562 | 1486.7754 | +2;+3    | 94.0  | Q99LB7 | Sarcosine dehydrogenase, mitochondrial                               |
| GAQVIENcAVTGIRVR + Carbamidomethyl (C)                | 1741.9257 | 1741.9485 | 3        | 55.0  | Q99LB7 | Sarcosine dehydrogenase, mitochondrial                               |
| RDPLHEELLQGcVFQER + Carbamidomethyl (C)               | 2182.0589 | 2182.0774 | +2;+3;+4 | 111.0 | Q99LB7 | Sarcosine dehydrogenase, mitochondrial                               |
| VAAVETEhGSIQTPcVVNcAGVWASK + 2 Carbamidomethyl (C)    | 2837.3477 | 2837.3569 | 3        | 126.0 | Q99LB7 | Sarcosine dehydrogenase, mitochondrial                               |
| VAAVETEhGSIQTPcVVNcAGVWASKVGR + 2 Carbamidomethyl (C) | 3149.5387 | 3149.5738 | 4        | 64.0  | Q99LB7 | Sarcosine dehydrogenase, mitochondrial                               |
| IlcQGFTGK + Carbamidomethyl (C)                       | 1022.5219 | 1022.5323 | 2        | 74.0  | Q9WUM5 | Succinate--CoA ligase [ADP/GDP-forming] subunit alpha, mitochondrial |
| LIGNcPGVINPGEcK + 2 Carbamidomethyl (C)               | 1791.8648 | 1723.8536 | +2;+3    | 122.0 | Q9WUM5 | Succinate--CoA ligase [ADP/GDP-forming] subunit alpha, mitochondrial |
| IlcQGFTGKQGTfHsQQALEYGTK + Carbamidomethyl (C)        | 2698.3174 | 2698.3601 | +3;+4    | 119.0 | Q9WUM5 | Succinate--CoA ligase [ADP/GDP-forming] subunit alpha, mitochondrial |
| LcYLVK + Carbamidomethyl (C)                          | 794.436   | 794.4446  | 2        | 41.0  | Q9JIL4 | Na(+)/H(+) exchange regulatory cofactor NHE-RF3                      |
| IMFLLVdKETAR                                          | 1434.7905 | 1434.8033 | +2;+3    | 78.0  | Q9JIL4 | Na(+)/H(+) exchange regulatory cofactor NHE-RF3                      |
| FSPLLYcQSQELPNgsVK + Carbamidomethyl (C)              | 2066.0143 | 2066.0472 | +2;+3    | 111.0 | Q9JIL4 | Na(+)/H(+) exchange regulatory cofactor NHE-RF3                      |
| EAALNDKkPGPMNGAVEPcAQPR + Carbamidomethyl (C)         | 2506.2056 | 2506.2252 | +3;+4    | 90.0  | Q9JIL4 | Na(+)/H(+) exchange regulatory cofactor NHE-RF3                      |
| EGPAPIPAPLEATGSEPTDAEGHKPKLcR + Carbamidomethyl (C)   | 3153.54   | 3153.5482 | +4;+5    | 84.0  | Q9JIL4 | Na(+)/H(+) exchange regulatory cofactor NHE-RF3                      |
| SYIPScR + Carbamidomethyl (C)                         | 881.4065  | 881.4152  | 2        | 70.0  | Q91VA0 | Acyl-coenzyme A synthetase ACSM1, mitochondrial                      |
| HNQGLAFR                                              | 941.4831  | 941.4918  | 2        | 48.0  | Q91VA0 | Acyl-coenzyme A synthetase ACSM1, mitochondrial                      |
| SASPDHTcIK + Carbamidomethyl (C)                      | 1114.5077 | 1114.5113 | +2;+3    | 78.0  | Q91VA0 | Acyl-coenzyme A synthetase ACSM1, mitochondrial                      |



|                                                         |           |           |             |       |        |                                                 |
|---------------------------------------------------------|-----------|-----------|-------------|-------|--------|-------------------------------------------------|
| LVVSDHSHEGWLDfCfSLIK + Carbamidomethyl (C)              | 2241.0889 | 2241.0942 | +2;+3;+4    | 112.0 | Q91VA0 | Acyl-coenzyme A synthetase ACSM1, mitochondrial |
| AIVTTASLVPEVESVASEcPDLK + Carbamidomethyl (C)           | 2414.2251 | 2414.2557 | +2;+3       | 121.0 | Q91VA0 | Acyl-coenzyme A synthetase ACSM1, mitochondrial |
| LVVSDHSHEGWLDfCfSLIKSAS PDHTcIK + 2 Carbamidomethyl (C) | 3405.6122 | 3405.6787 | +3;+4;+5;+6 | 54.0  | Q91VA0 | Acyl-coenzyme A synthetase ACSM1, mitochondrial |
| VAcIGAWHPPAR + Carbamidomethyl (C)                      | 1236.6186 | 1236.6319 | +2;+3       | 90.0  | P27659 | 60S ribosomal protein L3                        |
| KVAcIGAWHPPAR + Carbamidomethyl (C)                     | 1364.7135 | 1364.728  | +2;+3;+4    | 109.0 | P27659 | 60S ribosomal protein L3                        |
| SINPLGGFVHYGEVTNDFIMLK GcVVGTK + Carbamidomethyl (C)    | 3151.5835 | 3151.624  | 3           | 61.0  | P27659 | 60S ribosomal protein L3                        |
| LFecSNQTGR + Carbamidomethyl (C)                        | 1210.5401 | 1210.5447 | 2           | 84.0  | Q62468 | Villin-1                                        |
| HVETNScDVQR + Carbamidomethyl (C)                       | 1343.5888 | 1343.5975 | +2;+3       | 90.0  | Q62468 | Villin-1                                        |
| TPScCYLWcGK + 3 Carbamidomethyl (C)                     | 1566.6306 | 1566.6363 | 2           | 70.0  | Q62468 | Villin-1                                        |
| ATSLNSNDVFILKTPScCYLWcGK + 3 Carbamidomethyl (C)        | 2969.3762 | 2969.4129 | 3           | 121.0 | Q62468 | Villin-1                                        |
| DSGSALGLGIALHTPcYAQIR + Carbamidomethyl (C)             | 2199.1106 | 2199.1438 | +2;+3       | 140.0 | Q6NSQ9 | Glucose-6-phosphatase 3                         |
| DSGSALGLGIALHTPcYAQIRR + Carbamidomethyl (C)            | 2355.2117 | 2355.24   | +3;+4       | 101.0 | Q6NSQ9 | Glucose-6-phosphatase 3                         |
| EVDEYcK + Carbamidomethyl (C)                           | 941.38    | 941.3805  | 2           | 41.0  | Q64442 | Sorbitol dehydrogenase                          |
| EVDEYcKIGR + Carbamidomethyl (C)                        | 1267.5867 | 1267.5976 | +2;+3       | 82.0  | Q64442 | Sorbitol dehydrogenase                          |
| HLKPGDRVAIEPGVPR                                        | 1739.9795 | 1739.994  | +3;+4       | 39.0  | Q64442 | Sorbitol dehydrogenase                          |
| MHSVGlcGSDVHYWEHGR + Carbamidomethyl (C)                | 2125.9211 | 2125.9314 | +3;+4;+5    | 97.0  | Q64442 | Sorbitol dehydrogenase                          |
| IGRYNLPTIFFcATPPDDGNLcR + 2 Carbamidomethyl (C)         | 2797.3316 | 2865.3933 | +2;+3       | 100.0 | Q64442 | Sorbitol dehydrogenase                          |
| cQPPDAVVWPQNVDQVSR + Carbamidomethyl (C)                | 2093.9953 | 2094.0196 | +2;+3       | 151.0 | Q7TNG8 | Probable D-lactate dehydrogenase, mitochondrial |
| LNcPVAPTLFLEFHGSQQTLAEQLQR + Carbamidomethyl (C)        | 2996.5178 | 2996.5554 | +2;+3;+4    | 120.0 | Q7TNG8 | Probable D-lactate dehydrogenase, mitochondrial |
| HSKLNcPVAPTLFLEFHGSQQTLAEQLQR + Carbamidomethyl (C)     | 3348.7037 | 3348.7167 | +4;+5       | 102.0 | Q7TNG8 | Probable D-lactate dehydrogenase, mitochondrial |
| AAFQLGSPWRR                                             | 1287.6836 | 1287.697  | 3           | 43.0  | P47738 | Aldehyde dehydrogenase, mitochondrial           |
| AVPAPNHQPEVFcNQIFINNE WHDAVSR + Carbamidomethyl (C)     | 3288.5523 | 3288.5941 | +3;+4       | 114.0 | P47738 | Aldehyde dehydrogenase, mitochondrial           |
| TSAVPAPNHQPEVFcNQIFINN EWDAVSR + Carbamidomethyl (C)    | 3476.632  | 3476.6721 | 4           | 47.0  | P47738 | Aldehyde dehydrogenase, mitochondrial           |
| ATSAVPAPNHQPEVFcNQIFIN NEWDAVSR + Carbamidomethyl (C)   | 3547.6691 | 3547.7305 | +3;+4       | 89.0  | P47738 | Aldehyde dehydrogenase, mitochondrial           |

|                                                                 |           |           |          |       |        |                                                |
|-----------------------------------------------------------------|-----------|-----------|----------|-------|--------|------------------------------------------------|
| AAATSAVPAPNHQPEVFcNQI<br>FINNEWHDVSR +<br>Carbamidomethyl (C)   | 3689.7433 | 3689.782  | 4        | 36.0  | P47738 | Aldehyde dehydrogenase, mitochondrial          |
| SAAATSAVPAPNHQPEVFcNQI<br>IFINNEWHDVSR +<br>Carbamidomethyl (C) | 3776.7754 | 3776.8267 | +3;+4    | 134.0 | P47738 | Aldehyde dehydrogenase, mitochondrial          |
| ENFScLTR +<br>Carbamidomethyl (C)                               | 1025.46   | 1025.4656 | 2        | 57.0  | P14152 | Malate dehydrogenase, cytoplasmic              |
| SAPSIPKENFScLTR +<br>Carbamidomethyl (C)                        | 1705.8457 | 1705.8675 | +2;+3    | 99.0  | P14152 | Malate dehydrogenase, cytoplasmic              |
| VIVVGNPANTNcLTASK +<br>Carbamidomethyl (C)                      | 1756.9142 | 1756.9347 | +2;+3    | 135.0 | P14152 | Malate dehydrogenase, cytoplasmic              |
| SVKVIVVGNPANTNcLTASK +<br>Carbamidomethyl (C)                   | 2071.1096 | 2071.1354 | +2;+3    | 123.0 | P14152 | Malate dehydrogenase, cytoplasmic              |
| YIIWSPVcR +<br>Carbamidomethyl (C)                              | 1192.6063 | 1192.6112 | 2        | 74.0  | P11352 | Glutathione peroxidase 1                       |
| GTTIRDYTEMNDLQK                                                 | 1783.841  | 1783.8446 | 3        | 58.0  | P11352 | Glutathione peroxidase 1                       |
| AAAQSTVYAFSARPLTGGEVPS<br>LGLSLRGK                              | 2890.5301 | 2890.5702 | +3;+4    | 84.0  | P11352 | Glutathione peroxidase 1                       |
| LSAAAQSTVYAFSARPLTGGEV<br>VSLGSLR                               | 2905.5298 | 2905.5722 | 3        | 117.0 | P11352 | Glutathione peroxidase 1                       |
| LSAAAQSTVYAFSARPLTGGEV<br>VSLGSLRGK                             | 3090.6462 | 3090.6637 | +3;+4    | 93.0  | P11352 | Glutathione peroxidase 1                       |
| GLVVLGFcPcNQFGHQENKNE<br>EILNSLK + Carbamidomethyl<br>(C)       | 3140.5713 | 3140.5978 | +3;+4    | 86.0  | P11352 | Glutathione peroxidase 1                       |
| VIATFACSGEK +<br>Carbamidomethyl (C)                            | 1181.5751 | 1181.5876 | 2        | 93.0  | Q9JLJ2 | 4-trimethylaminobutyraldehyde<br>dehydrogenase |
| REPLGvcVIGAWNYPFQIAC<br>WK + 2 Carbamidomethyl (C)              | 2720.3356 | 2720.3714 | 3        | 119.0 | Q9JLJ2 | 4-trimethylaminobutyraldehyde<br>dehydrogenase |
| AGAPPGLFNvVQGAATGQF<br>LcHHREVAK +<br>Carbamidomethyl (C)       | 2988.5141 | 2988.5473 | +3;+4;+5 | 72.0  | Q9JLJ2 | 4-trimethylaminobutyraldehyde<br>dehydrogenase |
| ScPKLIGNLAR +<br>Carbamidomethyl (C)                            | 1355.7707 | 1355.7687 | 3        | 85.0  | Q922D8 | C-1-tetrahydrofolate synthase,<br>cytoplasmic  |
| cTHWAEggQGALALAQAQR<br>+ Carbamidomethyl (C)                    | 2123.0331 | 2123.0582 | +2;+3    | 169.0 | Q922D8 | C-1-tetrahydrofolate synthase,<br>cytoplasmic  |
| IVGAPMHDLLLWNNATVTTcH<br>SK + Carbamidomethyl (C)               | 2577.2832 | 2577.287  | 4        | 53.0  | Q922D8 | C-1-tetrahydrofolate synthase,<br>cytoplasmic  |
| STTTIGLVQALGAHLRQNVFAC<br>VR + Carbamidomethyl (C)              | 2611.4017 | 2611.431  | +3;+4    | 100.0 | Q922D8 | C-1-tetrahydrofolate synthase,<br>cytoplasmic  |
| SKIVGAPMHDLLLWNNATVTT<br>cHSK + Carbamidomethyl (C)             | 2792.4102 | 2792.4365 | 5        | 58.0  | Q922D8 | C-1-tetrahydrofolate synthase,<br>cytoplasmic  |
| NTYGTGcFLlcNTGHK + 2<br>Carbamidomethyl (C)                     | 1841.8189 | 1909.861  | +2;+3    | 117.0 | Q64516 | Glycerol kinase                                |
| cVFSEHGLLTTVAYKLGR +<br>Carbamidomethyl (C)                     | 2050.067  | 2050.0804 | +2;+3;+4 | 175.0 | Q64516 | Glycerol kinase                                |

|                                                                           |           |           |          |       |               |                                                                                                    |
|---------------------------------------------------------------------------|-----------|-----------|----------|-------|---------------|----------------------------------------------------------------------------------------------------|
| VcNLIDSGTKEGASILLDGR + Carbamidomethyl (C)                                | 2117.0787 | 2185.1286 | +2;+3    | 143.0 | Q9EQ20        | Methylmalonate-semialdehyde dehydrogenase [acylating], mitochondrial                               |
| LLQDSGAPDGTLNIIHGQHDA VNFicDHPDIK + Carbamidomethyl (C)                   | 3509.6998 | 3509.7358 | +3;+4;+5 | 71.0  | Q9EQ20        | Methylmalonate-semialdehyde dehydrogenase [acylating], mitochondrial                               |
| LLQDSGAPDGTLNIIHGQHDA VNFicDHPDIKAISFVGSNQAG EYIFER + Carbamidomethyl (C) | 5378.6055 | 5378.6709 | +5;+6    | 59.0  | Q9EQ20        | Methylmalonate-semialdehyde dehydrogenase [acylating], mitochondrial                               |
| VGVPTEGTGALTLNRLcGSGFQS IVSGcQEicSK + 3 Carbamidomethyl (C)               | 3524.7062 | 3592.7617 | +3;+4    | 105.0 | Q8BWT1        | 3-ketoacyl-CoA thiolase, mitochondrial                                                             |
| GTSAFKEPVVYTSFcHQLR + Carbamidomethyl (C)                                 | 2226.0892 | 2226.1058 | +2;+3;+4 | 123.0 | Q7TMS5        | ATP-binding cassette sub-family G member 2                                                         |
| LNcQVIGASVDSHFcHLAWINT PK + 2 Carbamidomethyl (C)                         | 2834.3633 | 2834.3729 | +3;+4    | 102.0 | P35700        | Peroxiredoxin-1                                                                                    |
| KLncQVIGASVDSHFcHLAWINT PK + 2 Carbamidomethyl (C)                        | 2894.432  | 2962.5071 | +3;+4    | 98.0  | P35700        | Peroxiredoxin-1                                                                                    |
| LNcQVIGASVDSHFcHLAWINT PKK + 2 Carbamidomethyl (C)                        | 2962.4582 | 2962.4874 | +3;+5    | 45.0  | P35700        | Peroxiredoxin-1                                                                                    |
| SIQFVDWcPTGFK + Carbamidomethyl (C)                                       | 1583.7443 | 1583.7627 | 2        | 82.0  | P68368,P05213 | Tubulin alpha-4A chain,Tubulin alpha-1B chain                                                      |
| TIGGGDSDFTTFFcETGAGK + Carbamidomethyl (C)                                | 2066.8892 | 2066.9162 | 2        | 143.0 | P68368        | Tubulin alpha-4A chain                                                                             |
| SIQFVDWcPTGFKVGINYQPPT VVPGDLAK + Carbamidomethyl (C)                     | 3389.7119 | 3389.7535 | 3        | 100.0 | P68368,P05213 | Tubulin alpha-4A chain,Tubulin alpha-1B chain                                                      |
| AcTELGIR + Carbamidomethyl (C)                                            | 918.4593  | 918.4637  | 2        | 52.0  | Q05920        | Pyruvate carboxylase, mitochondrial                                                                |
| INGcAIQcR + 2 Carbamidomethyl (C)                                         | 1158.5274 | 1158.5365 | 2        | 84.0  | Q05920        | Pyruvate carboxylase, mitochondrial                                                                |
| ADFAQAcQDAGVR + Carbamidomethyl (C)                                       | 1407.6201 | 1407.6283 | 2        | 111.0 | Q05920        | Pyruvate carboxylase, mitochondrial                                                                |
| AGQRQVFFELNGQLR                                                           | 1761.9274 | 1761.9574 | +2;+3    | 107.0 | Q05920        | Pyruvate carboxylase, mitochondrial                                                                |
| INGcAIQcRVTTEDPAR + 2 Carbamidomethyl (C)                                 | 2027.9517 | 1959.9444 | 3        | 68.0  | Q05920        | Pyruvate carboxylase, mitochondrial                                                                |
| GAAQNIIPASTGAAK                                                           | 1368.7361 | 1368.7487 | 2        | 63.0  | P16858        | Glyceraldehyde-3-phosphate dehydrogenase                                                           |
| IVSNAScTTNcLAPLAK + 2 Carbamidomethyl (C)                                 | 1818.8968 | 1818.9117 | +2;+3    | 131.0 | P16858,Q64467 | Glyceraldehyde-3-phosphate dehydrogenase,Glyceraldehyde-3-phosphate dehydrogenase, testis-specific |
| ELGSPPGISLETIDAAFScPGSSR + Carbamidomethyl (C)                            | 2447.1638 | 2447.1854 | +2;+3    | 166.0 | Q91X72        | Hemopexin                                                                                          |
| SAVScLWAK + Carbamidomethyl (C)                                           | 1020.5062 | 1020.5096 | 2        | 75.0  | P02089        | Hemoglobin subunit beta-2                                                                          |

|                                                                |           |           |          |       |                      |                                                                     |
|----------------------------------------------------------------|-----------|-----------|----------|-------|----------------------|---------------------------------------------------------------------|
| VHLTDAEKSAVScLWAK + Carbamidomethyl (C)                        | 1913.9669 | 1913.9889 | +2;+3;+4 | 97.0  | P02089               | Hemoglobin subunit beta-2                                           |
| ALRLDVGNFSWGEccTR + 2 Carbamidomethyl (C)                      | 2194.9888 | 2195.0044 | +2;+3    | 112.0 | P62242               | 40S ribosomal protein S8                                            |
| ISSLLEEQFQQGKLLAcIASRPG QcGR + 2 Carbamidomethyl (C)           | 3113.575  | 3113.6017 | +3;+4    | 126.0 | P62242               | 40S ribosomal protein S8                                            |
| DGSASGTTLLEALDcILPPTRPT DKPLR + Carbamidomethyl (C)            | 2993.5492 | 2993.5702 | +3;+4    | 126.0 | P10126               | Elongation factor 1-alpha 1                                         |
| SGDAAIVDMVPGKPMcVESFS DYPPLGR + Carbamidomethyl (C)            | 2994.3926 | 2994.4091 | +3;+4    | 125.0 | P10126               | Elongation factor 1-alpha 1                                         |
| KDGSASGTTLLEALDcILPPTRP TDKPLR + Carbamidomethyl (C)           | 3121.6441 | 3121.6843 | +3;+4;+5 | 92.0  | P10126               | Elongation factor 1-alpha 1                                         |
| AATGEEVSAEDLGGADLHcR + Carbamidomethyl (C)                     | 2056.912  | 2056.9216 | 3        | 113.0 | Q3ULD5               | Methylcrotonoyl-CoA carboxylase beta chain, mitochondrial           |
| AQEIALQNRLPcIYLVDSGGAN LPR + Carbamidomethyl (C)               | 2767.4439 | 2767.4833 | 3        | 141.0 | Q3ULD5               | Methylcrotonoyl-CoA carboxylase beta chain, mitochondrial           |
| VlciPK + Carbamidomethyl (C)                                   | 728.4255  | 728.4345  | 2        | 46.0  | Q9JII6               | Alcohol dehydrogenase [NADP(+)]                                     |
| KVciPK + Carbamidomethyl (C)                                   | 856.5204  | 856.5244  | 2        | 58.0  | Q9JII6               | Alcohol dehydrogenase [NADP(+)]                                     |
| ALGLSNFNSR                                                     | 1077.5567 | 1077.5693 | 2        | 47.0  | Q9JII6               | Alcohol dehydrogenase [NADP(+)]                                     |
| cHPYLAQNELIAHcCHAR + 2 Carbamidomethyl (C)                     | 2156.9996 | 2157.023  | +2;+4    | 76.0  | Q9JII6               | Alcohol dehydrogenase [NADP(+)]                                     |
| SVASVRPAVLQVEcHPYLAQN ELIAHcCHAR + 2 Carbamidomethyl (C)       | 3492.7507 | 3492.7952 | 4        | 33.0  | Q9JII6               | Alcohol dehydrogenase [NADP(+)]                                     |
| QIDDVLSVASVRPAVLQVEcHP YLAQNELIAHcCHAR + 2 Carbamidomethyl (C) | 4176.0997 | 4176.1609 | +3;+6;+7 | 60.0  | Q9JII6               | Alcohol dehydrogenase [NADP(+)]                                     |
| cDVIDR + Carbamidomethyl (C)                                   | 776.3487  | 776.3537  | 2        | 43.0  | P60710,Q8BFZ3,P63260 | Actin, cytoplasmic 1,Beta-actin-like protein 2,Actin, cytoplasmic 2 |
| cDVIDRK + Carbamidomethyl (C)                                  | 904.4436  | 904.4504  | +2;+3    | 52.0  | P60710,Q8BFZ3,P63260 | Actin, cytoplasmic 1,Beta-actin-like protein 2,Actin, cytoplasmic 2 |
| VVDNGSGMcK + Carbamidomethyl (C)                               | 1065.4583 | 1065.4587 | 2        | 78.0  | P60710,Q8BFZ3        | Actin, cytoplasmic 1,Beta-actin-like protein 2                      |
| FRcPEALFQPSF + Carbamidomethyl (C)                             | 1497.7075 | 1497.7214 | 2        | 72.0  | P60710,P63260        | Actin, cytoplasmic 1,Actin, cytoplasmic 2                           |
| cATITPDEK + Carbamidomethyl (C)                                | 1033.475  | 1033.4778 | 2        | 69.0  | O88844               | Isocitrate dehydrogenase [NADP] cytoplasmic                         |
| SEGGFIWAcK + Carbamidomethyl (C)                               | 1153.5226 | 1153.5348 | 2        | 67.0  | O88844               | Isocitrate dehydrogenase [NADP] cytoplasmic                         |
| cATITPDEKR + Carbamidomethyl (C)                               | 1189.5761 | 1189.576  | +2;+3    | 93.0  | O88844               | Isocitrate dehydrogenase [NADP] cytoplasmic                         |

|                                                                        |           |           |          |       |        |                                                                 |
|------------------------------------------------------------------------|-----------|-----------|----------|-------|--------|-----------------------------------------------------------------|
| LVTGWVKPIIIGR                                                          | 1450.9024 | 1450.9156 | 3        | 94.0  | O88844 | Isocitrate dehydrogenase [NADP] cytoplasmic                     |
| KLGCeVLGVSVDSQFTHLAWI<br>NTPR + Carbamidomethyl (C)                    | 2826.4487 | 2826.4746 | +2;+3;+4 | 160.0 | Q61171 | Peroxiredoxin-2                                                 |
| SVDEALRLVQAFQYTDEHGEV<br>cPAGWKPG +<br>Carbamidomethyl (C)             | 3258.5404 | 3258.5869 | +3;+4    | 52.0  | Q61171 | Peroxiredoxin-2                                                 |
| SVDEALRLVQAFQYTDEHGEV<br>cPAGWKPGSDTIKPN +<br>Carbamidomethyl (C)      | 4013.9218 | 4013.9773 | 4        | 37.0  | Q61171 | Peroxiredoxin-2                                                 |
| SVDEALRLVQAFQYTDEHGEV<br>cPAGWKPGSDTIKPNVDD +<br>Carbamidomethyl (C)   | 4343.0441 | 4343.0972 | 5        | 62.0  | Q61171 | Peroxiredoxin-2                                                 |
| SVDEALRLVQAFQYTDEHGEV<br>cPAGWKPGSDTIKPNVDDSK +<br>Carbamidomethyl (C) | 4558.1711 | 4558.2201 | +5;+6    | 39.0  | Q61171 | Peroxiredoxin-2                                                 |
| cKSQFTITPGSEQIR +<br>Carbamidomethyl (C)                               | 1750.8672 | 1750.8707 | 3        | 59.0  | Q99K10 | Aconitate hydratase, mitochondrial                              |
| VGLIGScTNSSEYEDMGR +<br>Carbamidomethyl (C)                            | 1844.8033 | 1844.8202 | 2        | 149.0 | Q99K10 | Aconitate hydratase, mitochondrial                              |
| VAVPSTIHcDHLIEAQVGGEK +<br>Carbamidomethyl (C)                         | 2259.1318 | 2259.1582 | +2;+3;+4 | 133.0 | Q99K10 | Aconitate hydratase, mitochondrial                              |
| VAVPSTIHcDHLIEAQVGGEKD<br>LR + Carbamidomethyl (C)                     | 2643.3439 | 2643.3765 | +3;+4;+5 | 106.0 | Q99K10 | Aconitate hydratase, mitochondrial                              |
| EQWSNcPTIGQIR +<br>Carbamidomethyl (C)                                 | 1587.7464 | 1587.7596 | 2        | 91.0  | P10605 | Cathepsin B                                                     |
| ILRGENHcGIESEIVAGIPR +<br>Carbamidomethyl (C)                          | 2219.1481 | 2219.1684 | +2;+3;+4 | 154.0 | P10605 | Cathepsin B                                                     |
| LPETFDAREQWSNcPTIGQIR<br>+ Carbamidomethyl (C)                         | 2517.207  | 2517.2337 | 3        | 55.0  | P10605 | Cathepsin B                                                     |
| VNVEVSAEDLLTccGIQcGDGc<br>NGGYPSGAWSFWTCK + 4<br>Carbamidomethyl (C)   | 4121.8017 | 4121.8345 | +3;+4    | 104.0 | P10605 | Cathepsin B                                                     |
| cSAcSR + 2 Carbamidomethyl<br>(C)                                      | 807.3004  | 807.3023  | 2        | 50.0  | Q8CHT0 | Delta-1-pyrroline-5-carboxylate<br>dehydrogenase, mitochondrial |
| SAFEYGGQKcSAcSR + 2<br>Carbamidomethyl (C)                             | 1774.7403 | 1774.7602 | +2;+3    | 90.0  | Q8CHT0 | Delta-1-pyrroline-5-carboxylate<br>dehydrogenase, mitochondrial |
| LAGEcGGKNFHFVHSSADVDS<br>VVSGLR +<br>Carbamidomethyl (C)               | 2945.409  | 2945.4489 | +3;+4;+5 | 118.0 | Q8CHT0 | Delta-1-pyrroline-5-carboxylate<br>dehydrogenase, mitochondrial |

|                                                           |           |           |       |       |                                    |                                                                                                                                                                                                                                                                                       |
|-----------------------------------------------------------|-----------|-----------|-------|-------|------------------------------------|---------------------------------------------------------------------------------------------------------------------------------------------------------------------------------------------------------------------------------------------------------------------------------------|
| PGWScLVLTGAGGFLGQR + Carbamidomethyl (C)                  | 1761.8621 | 1761.8845 | +2;+3 | 153.0 | O35469,Q61694,P26150,Q61767,P26149 | 3 beta-hydroxysteroid dehydrogenase/Delta 5->4-isomerase type 6,3 beta-hydroxysteroid dehydrogenase type 5,3 beta-hydroxysteroid dehydrogenase/Delta 5->4-isomerase type 3,3 beta-hydroxysteroid dehydrogenase type 4,3 beta-hydroxysteroid dehydrogenase/Delta 5->4-isomerase type 2 |
| QNPMPcR + Carbamidomethyl (C)                             | 958.4113  | 958.4126  | 2     | 38.0  | Q91XE4                             | N-acyl-aromatic-L-amino acid amidohydrolase (carboxylate-forming)                                                                                                                                                                                                                     |
| ScTLTFLGSTATPDDPYEVKR + Carbamidomethyl (C)               | 2357.1209 | 2357.1316 | +2;+3 | 125.0 | Q91XE4                             | N-acyl-aromatic-L-amino acid amidohydrolase (carboxylate-forming)                                                                                                                                                                                                                     |
| ccSGAIVLTK + 2 Carbamidomethyl (C)                        | 1288.6519 | 1288.6533 | 2     | 100.0 | P52480                             | Pyruvate kinase PKM                                                                                                                                                                                                                                                                   |
| NTGIcTIGPASR + Carbamidomethyl (C)                        | 1358.6976 | 1358.706  | 2     | 81.0  | P52480                             | Pyruvate kinase PKM                                                                                                                                                                                                                                                                   |
| AEgSDVANAVLDGADcIMLSG ETAKGDYPLEAVR + Carbamidomethyl (C) | 3493.6341 | 3493.6684 | +3;+4 | 169.0 | P52480                             | Pyruvate kinase PKM                                                                                                                                                                                                                                                                   |
| TLcWcGVQHDR + 2 Carbamidomethyl (C)                       | 1430.6184 | 1430.6352 | +2;+3 | 85.0  | Q49B93                             | Sodium-coupled monocarboxylate transporter 2                                                                                                                                                                                                                                          |
| TLcWcGVQHDRETEQDYLDGSAWK + 2 Carbamidomethyl (C)          | 3040.308  | 3040.3537 | +3;+4 | 96.0  | Q49B93                             | Sodium-coupled monocarboxylate transporter 2                                                                                                                                                                                                                                          |
| ccGLcPcNR + 5 Carbamidomethyl (C)                         | 1468.5502 | 1468.5673 | 2     | 57.0  | O09044                             | Synaptosomal-associated protein 23                                                                                                                                                                                                                                                    |
| TLTELNKccGLcPcNR + 5 Carbamidomethyl (C)                  | 2267.9942 | 2268.037  | +2;+3 | 128.0 | O09044                             | Synaptosomal-associated protein 23                                                                                                                                                                                                                                                    |
| TLTELNKCCGLcPcNR + 3 Carbamidomethyl (C)                  | 2290.0037 | 2289.9964 | 3     | 36.0  | O09044                             | Synaptosomal-associated protein 23                                                                                                                                                                                                                                                    |
| GGSVQVLEDQELTcQPEPLVVK + Carbamidomethyl (C)              | 2424.2207 | 2424.2636 | +2;+3 | 123.0 | P17563,Q63836                      | Selenium-binding protein 1,Selenium-binding protein 2                                                                                                                                                                                                                                 |
| DcGNVPSEPK + Carbamidomethyl (C)                          | 1101.4761 | 1101.4814 | 2     | 67.0  | P14094                             | Sodium/potassium-transporting ATPase subunit beta-1                                                                                                                                                                                                                                   |
| EDcGNVPSEPK + Carbamidomethyl (C)                         | 1230.5187 | 1230.5265 | 2     | 66.0  | P14094                             | Sodium/potassium-transporting ATPase subunit beta-1                                                                                                                                                                                                                                   |
| DcGNVPSEPKER + Carbamidomethyl (C)                        | 1386.6198 | 1386.6283 | +2;+3 | 36.0  | P14094                             | Sodium/potassium-transporting ATPase subunit beta-1                                                                                                                                                                                                                                   |

|                                                                    |           |           |       |       |        |                                                             |
|--------------------------------------------------------------------|-----------|-----------|-------|-------|--------|-------------------------------------------------------------|
| YNPVLPVQcTGKR + Carbamidomethyl (C)                                | 1644.8406 | 1644.8627 | +2;+3 | 84.0  | P14094 | Sodium/potassium-transporting ATPase subunit beta-1         |
| TGGSWFKILLFVIFYGcLAGIFI GTIQVMLLTISELKPTYQDR + Carbamidomethyl (C) | 5139.7262 | 5139.7571 | +4;+5 | 66.0  | P14094 | Sodium/potassium-transporting ATPase subunit beta-1         |
| cVGVGESDGSIWNPdGIDPK + Carbamidomethyl (C)                         | 2100.9423 | 2100.9626 | 2     | 101.0 | P26443 | Glutamate dehydrogenase 1, mitochondrial                    |
| VYEGSILEADcDILIPAASEK + Carbamidomethyl (C)                        | 2292.1195 | 2292.1433 | +2;+3 | 120.0 | P26443 | Glutamate dehydrogenase 1, mitochondrial                    |
| AKVYEGSILEADcDILIPAASEK + Carbamidomethyl (C)                      | 2491.2516 | 2491.2696 | 3     | 113.0 | P26443 | Glutamate dehydrogenase 1, mitochondrial                    |
| LGGEVScLVAGTK + Carbamidomethyl (C)                                | 1289.6649 | 1289.6683 | 2     | 117.0 | Q99LC5 | Electron transfer flavoprotein subunit alpha, mitochondrial |
| TIYAGNALcTVK + Carbamidomethyl (C)                                 | 1309.67   | 1309.6724 | 2     | 85.0  | Q99LC5 | Electron transfer flavoprotein subunit alpha, mitochondrial |
| TIYAGNALcTVKcDEK + 2 Carbamidomethyl (C)                           | 1909.8914 | 1909.8974 | +2;+3 | 115.0 | Q99LC5 | Electron transfer flavoprotein subunit alpha, mitochondrial |
| NcWPR + Carbamidomethyl (C)                                        | 731.3173  | 731.3227  | 2     | 36.0  | P62918 | 60S ribosomal protein L8                                    |
| TELFIAAEGIHTGQFVYcGKK + Carbamidomethyl (C)                        | 2368.1886 | 2368.2165 | +3;+4 | 119.0 | P62918 | 60S ribosomal protein L8                                    |
| DVGAETLLHScKK + Carbamidomethyl (C)                                | 1456.7344 | 1456.7418 | +2;+3 | 103.0 | Q9D1A2 | Cytosolic non-specific dipeptidase                          |
| TVcIYGHLDVQPAALEDGWDS EPFTLVER + Carbamidomethyl (C)               | 3316.5711 | 3316.6096 | 3     | 118.0 | Q9D1A2 | Cytosolic non-specific dipeptidase                          |
| FrcPEAIFQPSF + Carbamidomethyl (C)                                 | 1497.7075 | 1497.7214 | 2     | 72.0  | Q8BFZ3 | Beta-actin-like protein 2                                   |
| NccEASRPFTLR + 2 Carbamidomethyl (C)                               | 1509.6817 | 1509.6817 | +2;+3 | 50.0  | Q9DCW2 | Phospholipid scramblase 2                                   |
| APPGVPIGYVTQTWHPcLPK + Carbamidomethyl (C)                         | 2217.1405 | 2217.1643 | 3     | 55.0  | Q9DCW2 | Phospholipid scramblase 2                                   |
| IQAPPGVPIGYVTQTWHPcLPK + Carbamidomethyl (C)                       | 2458.2831 | 2458.3105 | +2;+3 | 91.0  | Q9DCW2 | Phospholipid scramblase 2                                   |
| IEIQAPPGVPIGYVTQTWHPcLPK + Carbamidomethyl (C)                     | 2700.4098 | 2700.4324 | +2;+3 | 74.0  | Q9DCW2 | Phospholipid scramblase 2                                   |
| cLGFATR + Carbamidomethyl (C)                                      | 823.4011  | 823.4097  | 2     | 42.0  | Q9JLF6 | Protein-glutamine gamma-glutamyltransferase K               |
| ccGccScGNRGDDDWGPEPSG SR + 5 Carbamidomethyl (C)                   | 2644.9207 | 2644.9378 | 3     | 103.0 | Q9JLF6 | Protein-glutamine gamma-glutamyltransferase K               |
| ISLGLPVGAVINcADNTGAK + Carbamidomethyl (C)                         | 1969.0303 | 1969.0468 | +2;+3 | 110.0 | P62830 | 60S ribosomal protein L23                                   |
| FRISLGLPVGAVINcADNTGAK + Carbamidomethyl (C)                       | 2272.1998 | 2272.2094 | 3     | 131.0 | P62830 | 60S ribosomal protein L23                                   |
| TMGcLATTTHSK + Carbamidomethyl (C)                                 | 1205.5533 | 1205.5563 | +2;+3 | 79.0  | P61922 | 4-aminobutyrate aminotransferase, mitochondrial             |

|                                                             |           |           |          |       |                      |                                                                                     |
|-------------------------------------------------------------|-----------|-----------|----------|-------|----------------------|-------------------------------------------------------------------------------------|
| AHKIDIPSFWDWPIAPFPR                                         | 2219.1891 | 2219.1939 | 3        | 55.0  | P61922               | 4-aminobutyrate aminotransferase, mitochondrial                                     |
| QLNTIQNAEAVHFFcNYEESR + Carbamidomethyl (C)                 | 2569.1656 | 2569.1901 | 3        | 102.0 | P61922               | 4-aminobutyrate aminotransferase, mitochondrial                                     |
| cccVADR + 3 Carbamidomethyl (C)                             | 1075.3885 | 1075.3935 | 2        | 41.0  | Q8K2B3               | Succinate dehydrogenase [ubiquinone] flavoprotein subunit, mitochondrial            |
| AcALSIAEScRPGDKVPSIK + 2 Carbamidomethyl (C)                | 2226.1136 | 2226.1219 | +3;+4    | 65.0  | Q8K2B3               | Succinate dehydrogenase [ubiquinone] flavoprotein subunit, mitochondrial            |
| TYFScTSAHTSTGDGTAMVTR + Carbamidomethyl (C)                 | 2249.9682 | 2249.977  | 3        | 127.0 | Q8K2B3               | Succinate dehydrogenase [ubiquinone] flavoprotein subunit, mitochondrial            |
| TSDETLLEDAIEVcCK + Carbamidomethyl (C)                      | 1849.8979 | 1849.9119 | +2;+3    | 118.0 | Q9JKB1               | Ubiquitin carboxyl-terminal hydrolase isozyme L3                                    |
| GTAQQPRLFVGMILILFAEVLG LYGLIVALILSTK                        | 3870.2824 | 3870.3327 | +3;+4;+5 | 166.0 | P63082               | V-type proton ATPase 16 kDa proteolipid subunit                                     |
| LQELWGPcPR + Carbamidomethyl (C)                            | 1254.6179 | 1254.6227 | 2        | 67.0  | Q9WUB7,Q9WUB6        | Chloride channel protein ClC-Ka, Chloride channel protein ClC-Kb                    |
| EGSSGKPVTLQELWGPcPR + Carbamidomethyl (C)                   | 2097.0313 | 2097.0542 | +2;+3    | 105.0 | Q9WUB7               | Chloride channel protein ClC-Ka                                                     |
| VGLREGSSGKPVTLQELWGPcPR + Carbamidomethyl (C)               | 2522.3064 | 2522.3312 | +3;+4    | 72.0  | Q9WUB7               | Chloride channel protein ClC-Ka                                                     |
| LVKAFQFVETHGEVcPANWTP E + Carbamidomethyl (C)               | 2558.2264 | 2558.2369 | 3        | 78.0  | P20108               | Thioredoxin-dependent peroxide reductase, mitochondrial                             |
| AFQFVETHGEVcPANWTPESP TIKPSPTA + Carbamidomethyl (C)        | 3197.5128 | 3197.5399 | 3        | 114.0 | P20108               | Thioredoxin-dependent peroxide reductase, mitochondrial                             |
| AFQFVETHGEVcPANWTPESP TIKPSPTASKEYFEK + Carbamidomethyl (C) | 4108.9517 | 4108.9993 | 4        | 66.0  | P20108               | Thioredoxin-dependent peroxide reductase, mitochondrial                             |
| ALNGFTPLHIAcK + Carbamidomethyl (C)                         | 1440.7547 | 1440.7691 | 3        | 74.0  | Q02357,G5E8K5,Q8C8R3 | Ankyrin-1,Ankyrin-3,Ankyrin-2                                                       |
| GFcKADAATSFLR + Carbamidomethyl (C)                         | 1442.6976 | 1442.712  | +2;+3    | 84.0  | Q02357               | Ankyrin-1                                                                           |
| ALNGFTPLHIAcKK + Carbamidomethyl (C)                        | 1568.8497 | 1568.859  | +3;+4    | 73.0  | Q02357,G5E8K5,Q8C8R3 | Ankyrin-1,Ankyrin-3,Ankyrin-2                                                       |
| GcALQcAILSPAFK + 2 Carbamidomethyl (C)                      | 1602.7898 | 1602.8102 | 2        | 86.0  | Q61316,Q61699,P48722 | Heat shock 70 kDa protein 4,Heat shock protein 105 kDa,Heat shock 70 kDa protein 4L |



|                                                       |           |           |       |       |        |                                                   |
|-------------------------------------------------------|-----------|-----------|-------|-------|--------|---------------------------------------------------|
| AGGIETIANEYSDRcTPAcVSFG<br>PK + 2 Carbamidomethyl (C) | 2699.2319 | 2699.2684 | 3     | 92.0  | Q61316 | Heat shock 70 kDa protein 4                       |
| LGGTcVNVGcVPK + 2<br>Carbamidomethyl (C)              | 1427.6901 | 1427.7071 | 2     | 109.0 | P47791 | Glutathione reductase, mitochondrial              |
| AAVVESHKLGGTcVNVGcVPK<br>+ 2 Carbamidomethyl (C)      | 2249.1297 | 2249.1546 | +3;+4 | 111.0 | P47791 | Glutathione reductase, mitochondrial              |
| YIQAAcK + Carbamidomethyl<br>(C)                      | 852.4164  | 852.4167  | 2     | 49.0  | Q68FD5 | Clathrin heavy chain 1                            |
| YIQAAcKTGQIK +<br>Carbamidomethyl (C)                 | 1379.7231 | 1379.7343 | 3     | 47.0  | Q68FD5 | Clathrin heavy chain 1                            |
| HSSLAGcQIINYRTDAK +<br>Carbamidomethyl (C)            | 1932.9476 | 1932.9684 | 3     | 83.0  | Q68FD5 | Clathrin heavy chain 1                            |
| LASTLVHLGEYQAAVDGAR                                   | 1970.0221 | 1970.0295 | 3     | 114.0 | Q68FD5 | Clathrin heavy chain 1                            |
| AGcLcGYLK + 2<br>Carbamidomethyl (C)                  | 1221.5886 | 1221.6006 | 2     | 61.0  | Q92317 | Sodium/glucose cotransporter 2                    |
| VcGTEVGcSNIAYPR + 2<br>Carbamidomethyl (C)            | 1749.7814 | 1749.8003 | 2     | 161.0 | Q92317 | Sodium/glucose cotransporter 2                    |
| cSVDFAR +<br>Carbamidomethyl (C)                      | 853.3752  | 853.3761  | 2     | 52.0  | P24527 | Leukotriene A-4 hydrolase                         |
| AILPcQDTPSVK +<br>Carbamidomethyl (C)                 | 1327.6806 | 1327.6855 | 2     | 100.0 | P24527 | Leukotriene A-4 hydrolase                         |
| PEVADTcSLASPASVcR + 2<br>Carbamidomethyl (C)          | 1886.8502 | 1886.8793 | 2     | 138.0 | P24527 | Leukotriene A-4 hydrolase                         |
| LVVEcVMK +<br>Carbamidomethyl (C)                     | 976.5086  | 976.52    | 2     | 64.0  | P04117 | Fatty acid-binding protein, adipocyte             |
| DGDKLVVEcVMK +<br>Carbamidomethyl (C)                 | 1391.6789 | 1391.6943 | +2;+3 | 87.0  | P04117 | Fatty acid-binding protein, adipocyte             |
| STLTDSLvcK +<br>Carbamidomethyl (C)                   | 1122.5591 | 1122.5716 | 2     | 83.0  | P58252 | Elongation factor 2                               |
| cLYASVLTAQPR +<br>Carbamidomethyl (C)                 | 1377.7075 | 1377.7148 | 2     | 86.0  | P58252 | Elongation factor 2                               |
| RcLYASVLTAQPR +<br>Carbamidomethyl (C)                | 1533.8086 | 1533.8248 | +2;+3 | 95.0  | P58252 | Elongation factor 2                               |
| STLTDSLvcKAGIIASAR +<br>Carbamidomethyl (C)           | 1861.9931 | 1862.014  | 3     | 90.0  | P58252 | Elongation factor 2                               |
| AYDLFcGLDQDKGPK +<br>Carbamidomethyl (C)              | 1725.8032 | 1725.8145 | +2;+3 | 109.0 | Q8C3K6 | Sodium/glucose cotransporter 1                    |
| cDLEIQANGR +<br>Carbamidomethyl (C)                   | 1174.5401 | 1174.552  | 2     | 74.0  | P21981 | Protein-glutamine gamma-<br>glutamyltransferase 2 |
| DHHTADLcQEK +<br>Carbamidomethyl (C)                  | 1352.5779 | 1352.5848 | +2;+3 | 65.0  | P21981 | Protein-glutamine gamma-<br>glutamyltransferase 2 |
| SEGTycGPVSVR + 2<br>Carbamidomethyl (C)               | 1538.6494 | 1538.6673 | 2     | 89.0  | P21981 | Protein-glutamine gamma-<br>glutamyltransferase 2 |
| ILLNAccPGWVR + 2<br>Carbamidomethyl (C)               | 1457.7272 | 1457.7355 | 2     | 87.0  | P48758 | Carbonyl reductase [NADPH] 1                      |
| DVcKELLPLIKPQGR +<br>Carbamidomethyl (C)              | 1764.992  | 1765.0099 | +3;+4 | 78.0  | P48758 | Carbonyl reductase [NADPH] 1                      |
| KVVVcDNGTGFVK +<br>Carbamidomethyl (C)                | 1421.7337 | 1421.7496 | +2;+3 | 100.0 | P61161 | Actin-related protein 2                           |
| AGGIETIANEFSDRcTPSVISFGS<br>K + Carbamidomethyl (C)   | 2642.2646 | 2642.2957 | 3     | 110.0 | Q61699 | Heat shock protein 105 kDa                        |
| KGVLFGVPGAFTPGcSK +<br>Carbamidomethyl (C)            | 1720.8971 | 1720.911  | +2;+3 | 127.0 | P99029 | Peroxisome oxidoreductin-5, mitochondrial         |
| LLAYcK + Carbamidomethyl<br>(C)                       | 766.4047  | 766.4125  | 2     | 37.0  | Q8K023 | Aldo-keto reductase family 1 member<br>C18        |

|                                                                        |           |           |          |       |        |                                                             |
|------------------------------------------------------------------------|-----------|-----------|----------|-------|--------|-------------------------------------------------------------|
| YKPVcNQVEcHLYLNQSK + 2<br>Carbamidomethyl (C)                          | 2347.1089 | 2347.1374 | +2;+3;+4 | 87.0  | Q8K023 | Aldo-keto reductase family 1 member<br>C18                  |
| LLAYcKMNDIVLVAYGALGTQ<br>R + Carbamidomethyl (C)                       | 2468.2919 | 2468.3171 | 3        | 33.0  | Q8K023 | Aldo-keto reductase family 1 member<br>C18                  |
| VKLVHcK +<br>Carbamidomethyl (C)                                       | 882.5109  | 882.5097  | 2        | 59.0  | Q91ZA3 | Propionyl-CoA carboxylase alpha chain,<br>mitochondrial     |
| MADEAVcVGPAPTSK +<br>Carbamidomethyl (C)                               | 1531.7011 | 1531.7088 | 2        | 143.0 | Q91ZA3 | Propionyl-CoA carboxylase alpha chain,<br>mitochondrial     |
| VLHEAEGHIVTcETNTGEVYR +<br>Carbamidomethyl (C)                         | 2413.1332 | 2413.154  | +3;+4    | 116.0 | P62320 | Small nuclear ribonucleoprotein Sm D3                       |
| PSIKFcLDNGAK +<br>Carbamidomethyl (C)                                  | 1348.6809 | 1348.6409 | 3        | 38.0  | P09411 | Phosphoglycerate kinase 1                                   |
| AAVPSIKFcLDNGAK +<br>Carbamidomethyl (C)                               | 1589.8235 | 1589.8406 | 3        | 69.0  | P09411 | Phosphoglycerate kinase 1                                   |
| GcITIIIGGGDTATccAK + 3<br>Carbamidomethyl (C)                          | 1889.8322 | 1889.8441 | 2        | 99.0  | P09411 | Phosphoglycerate kinase 1                                   |
| LKGPnHsvSTAcTTGAHAVGD<br>SFR + Carbamidomethyl (C)                     | 2469.1819 | 2469.2002 | +3;+4;+5 | 103.0 | Q9D404 | 3-oxoacyl-[acyl-carrier-protein] synthase,<br>mitochondrial |
| GFSWDNcDEGKDPaVIK +<br>Carbamidomethyl (C)                             | 1936.8625 | 1936.8872 | +2;+3    | 84.0  | Q60648 | Ganglioside GM2 activator                                   |
| NFSNHwIFwVGPfIGGALAVLI<br>YDFILAPR                                     | 3432.8176 | 3432.8266 | +3;+4    | 96.0  | Q02013 | Aquaporin-1                                                 |
| GIEELFDLcK +<br>Carbamidomethyl (C)                                    | 1335.6744 | 1335.6891 | 2        | 86.0  | P35282 | Ras-related protein Rab-21                                  |
| GIEELFDLcKR +<br>Carbamidomethyl (C)                                   | 1491.7755 | 1491.7792 | +2;+3    | 88.0  | P35282 | Ras-related protein Rab-21                                  |
| ALKPPcDLsMQSVEIAGTTDGI<br>RR + Carbamidomethyl (C)                     | 2614.3207 | 2614.3314 | 4        | 111.0 | P41216 | Long-chain-fatty-acid--CoA ligase 1                         |
| VKPKPPEPEDLAIcFTSGTTGN<br>PK + Carbamidomethyl (C)                     | 2695.3891 | 2695.425  | +3;+4    | 97.0  | P41216 | Long-chain-fatty-acid--CoA ligase 1                         |
| IYGGsvTGATcK +<br>Carbamidomethyl (C)                                  | 1325.6649 | 1325.6804 | 2        | 121.0 | P17751 | Triosephosphate isomerase                                   |
| IYGGsvTGATcKELASQPDVD<br>GFLVGGASLKPEFVDIINAK +<br>Carbamidomethyl (C) | 4336.2301 | 4336.2933 | 4        | 43.0  | P17751 | Triosephosphate isomerase                                   |
| TLSPGDSFSTFDTPYcK +<br>Carbamidomethyl (C)                             | 1921.8404 | 1921.8572 | 2        | 147.0 | Q9JHW2 | Omega-amidase NIT2                                          |
| VlcSSPAPR +<br>Carbamidomethyl (C)                                     | 985.5015  | 985.5061  | 2        | 72.0  | Q8VDZ4 | Palmitoyltransferase ZDHHC5                                 |
| FRGGVNPFTNGccNNVSR + 2<br>Carbamidomethyl (C)                          | 2054.9163 | 2054.9498 | 3        | 101.0 | Q8VDZ4 | Palmitoyltransferase ZDHHC5                                 |
| ILADSINSEVGILcHALQK +<br>Carbamidomethyl (C)                           | 2080.0986 | 2080.1192 | +2;+3    | 135.0 | P16331 | Phenylalanine-4-hydroxylase                                 |

|                                                         |           |           |       |       |                                                  |                                                                                                                                                                                                                                                                                          |
|---------------------------------------------------------|-----------|-----------|-------|-------|--------------------------------------------------|------------------------------------------------------------------------------------------------------------------------------------------------------------------------------------------------------------------------------------------------------------------------------------------|
| cVVVGDAVGK + Carbamidomethyl (C)                        | 1059.5383 | 1059.538  | 2     | 89.0  | Q8R527,P60766,P84096,P63001,P60764,Q9ER71,Q05144 | Rho-related GTP-binding protein RhoQ,Cell division control protein 42 homolog,Rho-related GTP-binding protein RhoG,Ras-related C3 botulinum toxin substrate 1,Ras-related C3 botulinum toxin substrate 3,Rho-related GTP-binding protein RhoJ,Ras-related C3 botulinum toxin substrate 2 |
| YVEcSALTQK + Carbamidomethyl (C)                        | 1197.57   | 1197.5815 | 2     | 83.0  | Q8R527,P60766                                    | Rho-related GTP-binding protein RhoQ,Cell division control protein 42 homolog                                                                                                                                                                                                            |
| LLFcTGKVVYDLTR + Carbamidomethyl (C)                    | 1747.8967 | 1747.9151 | 3     | 61.0  | Q60597                                           | 2-oxoglutarate dehydrogenase, mitochondrial                                                                                                                                                                                                                                              |
| VVNAPIFHVNSDDPEAVMYVcK + Carbamidomethyl (C)            | 2503.1876 | 2503.1966 | 3     | 99.0  | Q60597                                           | 2-oxoglutarate dehydrogenase, mitochondrial                                                                                                                                                                                                                                              |
| GVTIIGPATVGGIKPGcFK + Carbamidomethyl (C)               | 1871.0339 | 1871.0563 | +2;+3 | 89.0  | Q91V92                                           | ATP-citrate synthase                                                                                                                                                                                                                                                                     |
| ALMGLYNGQVLcKK + Carbamidomethyl (C)                    | 1593.8371 | 1593.8445 | +2;+3 | 89.0  | Q8BMS1                                           | Trifunctional enzyme subunit alpha, mitochondrial                                                                                                                                                                                                                                        |
| EVESVTPeHcIFASNTSALPINQIAAVSKRPEK + Carbamidomethyl (C) | 3621.8461 | 3621.8647 | +4;+5 | 74.0  | Q8BMS1                                           | Trifunctional enzyme subunit alpha, mitochondrial                                                                                                                                                                                                                                        |
| VTNRDIcQIAYAR + Carbamidomethyl (C)                     | 1691.8777 | 1691.8868 | +2;+3 | 97.0  | P47962                                           | 60S ribosomal protein L5                                                                                                                                                                                                                                                                 |
| cTGGEVGATSALAPK + Carbamidomethyl (C)                   | 1417.6871 | 1417.6952 | 2     | 136.0 | P35979                                           | 60S ribosomal protein L12                                                                                                                                                                                                                                                                |
| ccLGWDFSTQQVK + 2 Carbamidomethyl (C)                   | 1695.7385 | 1695.7488 | 2     | 88.0  | Q3TNA1                                           | Xylulose kinase                                                                                                                                                                                                                                                                          |
| VWSQAclDVcAPHLEEK + 2 Carbamidomethyl (C)               | 2040.9397 | 2040.9413 | 3     | 96.0  | Q3TNA1                                           | Xylulose kinase                                                                                                                                                                                                                                                                          |
| cATITPDEAR + Carbamidomethyl (C)                        | 1132.5183 | 1132.5153 | 2     | 94.0  | P54071                                           | Isocitrate dehydrogenase [NADP], mitochondrial                                                                                                                                                                                                                                           |
| cATITPDEARVEEFK + Carbamidomethyl (C)                   | 1764.8352 | 1764.8557 | +2;+3 | 62.0  | P54071                                           | Isocitrate dehydrogenase [NADP], mitochondrial                                                                                                                                                                                                                                           |
| GRPTSTNPIASIFAWTRGLEHR                                  | 2466.288  | 2466.3107 | 4     | 42.0  | P54071                                           | Isocitrate dehydrogenase [NADP], mitochondrial                                                                                                                                                                                                                                           |
| KVDGQQTIIAcIESHQFQAK + Carbamidomethyl (C)              | 2300.1583 | 2300.1883 | 3     | 124.0 | P47754                                           | F-actin-capping protein subunit alpha-2                                                                                                                                                                                                                                                  |
| SETVLTcSNGR + Carbamidomethyl (C)                       | 1222.5612 | 1222.5651 | 2     | 71.0  | Q62470                                           | Integrin alpha-3                                                                                                                                                                                                                                                                         |
| AKSETVLTcSNGR + Carbamidomethyl (C)                     | 1421.6933 | 1421.7025 | +2;+3 | 88.0  | Q62470                                           | Integrin alpha-3                                                                                                                                                                                                                                                                         |

|                                                  |           |           |          |       |                             |                                                                                       |
|--------------------------------------------------|-----------|-----------|----------|-------|-----------------------------|---------------------------------------------------------------------------------------|
| ITQLSAPHcK + Carbamidomethyl (C)                 | 1153.5914 | 1153.5933 | +2;+3    | 72.0  | Q8BH00                      | Aldehyde dehydrogenase family 8 member A1                                             |
| ITQLSAPHcKK + Carbamidomethyl (C)                | 1281.6863 | 1281.6943 | +2;+3    | 75.0  | Q8BH00                      | Aldehyde dehydrogenase family 8 member A1                                             |
| IIPGFMcQGDFTR + Carbamidomethyl (C)              | 1597.7381 | 1597.7524 | 2        | 112.0 | P17742                      | Peptidyl-prolyl cis-trans isomerase A                                                 |
| VHTGPccccPccPPLILTR + 7 Carbamidomethyl (C)      | 2517.0337 | 2517.0642 | 3        | 76.0  | Q8R000                      | Organic solute transporter subunit alpha                                              |
| VHTGPcCCccPccPPLILTR + 5 Carbamidomethyl (C)     | 2539.0432 | 2539.0534 | 3        | 39.0  | Q8R000                      | Organic solute transporter subunit alpha                                              |
| EKPDDPLNYFIGGcAGGLTLGAR + Carbamidomethyl (C)    | 2420.1794 | 2420.2053 | 3        | 120.0 | Q9D8B4                      | NADH dehydrogenase [ubiquinone] 1 alpha subcomplex subunit 11                         |
| YIPcPVFR + Carbamidomethyl (C)                   | 1163.6161 | 1163.623  | 2        | 58.0  | Q9Z2J0                      | Solute carrier family 23 member 1                                                     |
| YIPcPVFRG + Carbamidomethyl (C)                  | 1220.6376 | 1220.6397 | 2        | 46.0  | Q9Z2J0                      | Solute carrier family 23 member 1                                                     |
| TTFFRYIPcPVFR + Carbamidomethyl (C)              | 1815.9494 | 1815.9689 | +2;+3    | 70.0  | Q9Z2J0                      | Solute carrier family 23 member 1                                                     |
| cSDFTEEIcR + 2 Carbamidomethyl (C)               | 1383.5435 | 1383.5455 | 2        | 81.0  | Q9D6R2                      | Isocitrate dehydrogenase [NAD] subunit alpha, mitochondrial                           |
| IEAAcFATIKDGK + Carbamidomethyl (C)              | 1422.7177 | 1422.7323 | +2;+3    | 90.0  | Q9D6R2                      | Isocitrate dehydrogenase [NAD] subunit alpha, mitochondrial                           |
| cSDFTEEIcRR + 2 Carbamidomethyl (C)              | 1539.6446 | 1539.6507 | +2;+3    | 57.0  | Q9D6R2                      | Isocitrate dehydrogenase [NAD] subunit alpha, mitochondrial                           |
| VAPEEVSEVIFGHVLTAGcGQN PTR + Carbamidomethyl (C) | 2666.3123 | 2666.3417 | 3        | 126.0 | Q8CAY6                      | Acetyl-CoA acetyltransferase, cytosolic                                               |
| HNSYtcEATHK + Carbamidomethyl (C)                | 1346.5673 | 1346.5717 | +2;+3    | 85.0  | P01837                      | Ig kappa chain C region                                                               |
| AIPcIKGYDVIAQAQSGTGK + Carbamidomethyl (C)       | 2189.1514 | 2189.1612 | 3        | 124.0 | P10630                      | Eukaryotic initiation factor 4A-II                                                    |
| AIPcIKGYDVIAQAQSGTGK + Carbamidomethyl (C)       | 2189.1514 | 2189.1612 | 3        | 124.0 | P60843                      | Eukaryotic initiation factor 4A-I                                                     |
| ISFRPGNQEcYDNFLQTGETAK + Carbamidomethyl (C)     | 2574.1809 | 2574.2129 | 3        | 115.0 | P55014                      | Solute carrier family 12 member 1                                                     |
| MREIVHLQAGQcGNQIGAK + Carbamidomethyl (C)        | 2109.0571 | 2109.0799 | +2;+3;+4 | 113.0 | Q9D6F9,P68372               | Tubulin beta-4A chain,Tubulin beta-4B chain                                           |
| MREIVHIQAGQcGNQIGAK + Carbamidomethyl (C)        | 2109.0571 | 2109.0799 | +2;+3;+4 | 113.0 | Q9CWF2,Q9ERD7,P99024,Q7TMM9 | Tubulin beta-2B chain,Tubulin beta-3 chain,Tubulin beta-5 chain,Tubulin beta-2A chain |

|                                                |           |           |          |       |               |                                                                 |
|------------------------------------------------|-----------|-----------|----------|-------|---------------|-----------------------------------------------------------------|
| TyCPANNEPIAR + Carbamidomethyl (C)             | 1404.6456 | 1404.6553 | 2        | 35.0  | Q9DBF1        | Alpha-aminoadipic semialdehyde dehydrogenase                    |
| STcTINYSTSLPLAQGIK + Carbamidomethyl (C)       | 1952.9877 | 1953.0015 | +2;+3    | 106.0 | Q9DBF1        | Alpha-aminoadipic semialdehyde dehydrogenase                    |
| IcNQVLVcER + 2 Carbamidomethyl (C)             | 1289.622  | 1357.6565 | 2        | 79.0  | Q9Z2I9        | Succinate--CoA ligase [ADP-forming] subunit beta, mitochondrial |
| TSASIGSLcADAR + Carbamidomethyl (C)            | 1307.614  | 1307.6312 | 2        | 111.0 | P60202        | Myelin proteolipid protein                                      |
| VAQLPLKTcHLEDFLDK + Carbamidomethyl (C)        | 2026.0557 | 2026.0715 | +3;+4    | 81.0  | O88576        | Sodium-dependent neutral amino acid transporter B(0)AT3         |
| cKDDEFTHLYTLVIRPDNTYEV K + Carbamidomethyl (C) | 2855.38   | 2855.4128 | +3;+4;+5 | 85.0  | P14211        | Calreticulin                                                    |
| TTVFScNLGKcFDETTADGR + Carbamidomethyl (C)     | 2247.0114 | 2247.0363 | 3        | 133.0 | Q05816        | Fatty acid-binding protein, epidermal                           |
| AIGGYPFLNGQYFIQcSK + Carbamidomethyl (C)       | 2061.9982 | 2062.0268 | +2;+3    | 108.0 | O09043        | Napsin-A                                                        |
| RPPSAFFLfcSEYRPK + Carbamidomethyl (C)         | 2000.9931 | 2001.013  | +3;+4    | 87.0  | P63158        | High mobility group protein B1                                  |
| VLFPDDVGcVVPSEcLR + 2 Carbamidomethyl (C)      | 2028.9649 | 2028.9938 | +2;+3    | 111.0 | Q55WY8        | Sodium/glucose cotransporter 5                                  |
| TVYHAEVQcDGR + Carbamidomethyl (C)             | 1562.6784 | 1562.6784 | +2;+3    | 85.0  | P97314        | Cysteine and glycine-rich protein 2                             |
| cSPGSAGPAGSESEPR + Carbamidomethyl (C)         | 1544.6525 | 1544.6537 | 2        | 138.0 | Q9D7J9        | Enoyl-CoA hydratase domain-containing protein 3, mitochondrial  |
| GLYDGPVcEVSVTPK + Carbamidomethyl (C)          | 1619.7865 | 1619.7978 | 2        | 114.0 | O08553        | Dihydropyrimidinase-related protein 2                           |
| LVSSPccIvTSTYGWTANMER + 2 Carbamidomethyl (C)  | 2431.097  | 2431.1406 | 2        | 103.0 | P11499        | Heat shock protein HSP 90-beta                                  |
| HFRDEELScSVLELK + Carbamidomethyl (C)          | 1860.904  | 1860.9105 | +2;+3;+4 | 98.0  | P07759,Q03734 | Serine protease inhibitor A3K,Serine protease inhibitor A3M     |
| AALQAADcEVEQWNSDDPIR + Carbamidomethyl (C)     | 2455.1074 | 2455.1272 | +2;+3    | 142.0 | Q91Z53        | Glyoxylate reductase/hydroxypyruvate reductase                  |
| cLATGPGIAPTVK + Carbamidomethyl (C)            | 1283.6908 | 1283.6985 | 2        | 109.0 | Q80X90        | Filamin-B                                                       |
| cVYKPVQPGPHVVK + Carbamidomethyl (C)           | 1606.8654 | 1606.8708 | +2;+3;+4 | 87.0  | Q80X90        | Filamin-B                                                       |
| SMSVYcTPNKPSR + Carbamidomethyl (C)            | 1525.7017 | 1525.7106 | +2;+3    | 79.0  | O55143        | Sarcoplasmic/endoplasmic reticulum calcium ATPase 2             |
| GAPEGVIDRcTHIR + Carbamidomethyl (C)           | 1579.7889 | 1579.8012 | 3        | 44.0  | O55143        | Sarcoplasmic/endoplasmic reticulum calcium ATPase 2             |

|                                                        |           |           |          |       |                      |                                                                                                          |
|--------------------------------------------------------|-----------|-----------|----------|-------|----------------------|----------------------------------------------------------------------------------------------------------|
| NYLEQPGKEcVQPATK + Carbamidomethyl (C)                 | 1860.904  | 1860.9241 | 3        | 76.0  | O55143               | Sarcoplasmic/endoplasmic reticulum calcium ATPase 2                                                      |
| cSQPVSVK + Carbamidomethyl (C)                         | 903.4484  | 903.4544  | 2        | 62.0  | Q99MN9               | Propionyl-CoA carboxylase beta chain, mitochondrial                                                      |
| IccDLEVLASKK + 2 Carbamidomethyl (C)                   | 1502.7473 | 1502.7535 | 3        | 82.0  | Q99MN9               | Propionyl-CoA carboxylase beta chain, mitochondrial                                                      |
| KNNIHcNTIAPNAGSR + Carbamidomethyl (C)                 | 1765.8642 | 1765.8742 | +2;+3;+4 | 103.0 | P51660               | Peroxisomal multifunctional enzyme type 2                                                                |
| TGSQGQcTQVR + Carbamidomethyl (C)                      | 1220.5568 | 1220.5618 | 2        | 113.0 | P62858               | 40S ribosomal protein S28                                                                                |
| KPVPLQELWGPcPR + Carbamidomethyl (C)                   | 1675.8868 | 1675.8981 | +2;+3    | 93.0  | Q9WUB6               | Chloride channel protein ClC-Kb                                                                          |
| VGVGPGSVcTTR + Carbamidomethyl (C)                     | 1188.5921 | 1188.6045 | 2        | 96.0  | Q9DCZ1               | GMP reductase 1                                                                                          |
| LLLIGDSGVGKScLLLR + Carbamidomethyl (C)                | 1813.0495 | 1813.0687 | 3        | 95.0  | Q9D1G1,P62821        | Ras-related protein Rab-1B,Ras-related protein Rab-1A                                                    |
| IYHPNINSNGSicLDILR + Carbamidomethyl (C)               | 2098.0629 | 2098.0709 | 3        | 124.0 | P61079,P61080,P62838 | Ubiquitin-conjugating enzyme E2 D3,Ubiquitin-conjugating enzyme E2 D1,Ubiquitin-conjugating enzyme E2 D2 |
| EGIEcEVINLR + Carbamidomethyl (C)                      | 1330.6551 | 1330.6711 | 2        | 94.0  | Q9D051               | Pyruvate dehydrogenase E1 component subunit beta, mitochondrial                                          |
| IDPSAPLDKvcLLGcGISTGYGA AVNTAK + 2 Carbamidomethyl (C) | 3015.5045 | 3015.5173 | 3        | 128.0 | P28474               | Alcohol dehydrogenase class-3                                                                            |
| GlcFIR + Carbamidomethyl (C)                           | 764.4003  | 764.4013  | 2        | 46.0  | P40142               | Transketolase                                                                                            |
| AVELAANTKGlcFIR + Carbamidomethyl (C)                  | 1661.8923 | 1661.8861 | 3        | 50.0  | P40142               | Transketolase                                                                                            |
| DRTVPFcSTFAAFFTR + Carbamidomethyl (C)                 | 1921.9145 | 1921.9171 | +2;+3    | 80.0  | P40142               | Transketolase                                                                                            |
| cEAFGWHTIIVDGHsVEELcKA FGQAK + 2 Carbamidomethyl (C)   | 3156.4797 | 3156.5206 | +3;+4;+5 | 114.0 | P40142               | Transketolase                                                                                            |
| YKPVcNQVEcHLYLNQR + 2 Carbamidomethyl (C)              | 2288.083  | 2288.1094 | +3;+4    | 89.0  | Q8VC28               | Aldo-keto reductase family 1 member C13                                                                  |
| VADYIPQLAKFSPDLWGVSVcT VDGQR + Carbamidomethyl (C)     | 3020.5066 | 3020.551  | 3        | 92.0  | D3Z7P3               | Glutaminase kidney isoform, mitochondrial                                                                |
| QIQTFEAKPDDLlcTYPK + Carbamidomethyl (C)               | 2279.1508 | 2279.1574 | +2;+3    | 100.0 | Q9D939               | Sulfotransferase 1C2                                                                                     |
| GIGMWNANcLDYSSDALAR + Carbamidomethyl (C)              | 2140.9306 | 2140.9394 | +2;+3    | 130.0 | Q8R242               | Di-N-acetylchitobiase                                                                                    |
| QATLGAGLPiSTPcTTVnk + Carbamidomethyl (C)              | 1928.0037 | 1928.0226 | +2;+3    | 108.0 | Q8QZT1               | Acetyl-CoA acetyltransferase, mitochondrial                                                              |
| QVQSLTcEVDALKGTNESLER + Carbamidomethyl (C)            | 2376.1591 | 2376.1876 | 3        | 92.0  | P20152               | Vimentin                                                                                                 |

|                                                     |           |           |       |       |                             |                                                                      |
|-----------------------------------------------------|-----------|-----------|-------|-------|-----------------------------|----------------------------------------------------------------------|
| MTAVGLcQVAAR + Carbamidomethyl (C)                  | 1275.6428 | 1275.6452 | 2     | 102.0 | Q8CFZ5                      | Solute carrier family 22 member 12                                   |
| ILcFHGPPGVGK + Carbamidomethyl (C)                  | 1280.67   | 1280.6771 | +2;+3 | 98.0  | Q8CGK3                      | Lon protease homolog, mitochondrial                                  |
| SSAATANASSASCSR + Carbamidomethyl (C)               | 1426.6106 | 1426.615  | 2     | 117.0 | Q8BMK4                      | Cytoskeleton-associated protein 4                                    |
| cGSVLVR + Carbamidomethyl (C)                       | 789.4167  | 789.4176  | 2     | 64.0  | P25444                      | 40S ribosomal protein S2                                             |
| IGKPHTVPcKVTGR + Carbamidomethyl (C)                | 1548.8559 | 1548.8664 | +3;+4 | 62.0  | P25444                      | 40S ribosomal protein S2                                             |
| ADVQVSVDcPDLTKPFTFPV R + Carbamidomethyl (C)        | 2618.3051 | 2618.3158 | 3     | 106.0 | Q91V76                      | Ester hydrolase C11orf54 homolog                                     |
| IIAcDGGGGALGHPK + Carbamidomethyl (C)               | 1421.7085 | 1421.7139 | +2;+3 | 109.0 | P52503                      | NADH dehydrogenase [ubiquinone] iron-sulfur protein 6, mitochondrial |
| IAILTCPEPPKPK + Carbamidomethyl (C)                 | 1609.8902 | 1609.905  | 3     | 87.0  | P80316                      | T-complex protein 1 subunit epsilon                                  |
| VDcTADSDVcSAQGVR + 2 Carbamidomethyl (C)            | 1806.7513 | 1806.7641 | 2     | 96.0  | Q91W90                      | Thioredoxin domain-containing protein 5                              |
| IGKVDcTQHAYVcSEHQVR + 2 Carbamidomethyl (C)         | 2354.0896 | 2354.1111 | +3;+4 | 39.0  | Q91W90                      | Thioredoxin domain-containing protein 5                              |
| GFVPVAPicTDKINAVDYASVK + Carbamidomethyl (C)        | 2363.2195 | 2363.253  | +2;+3 | 141.0 | Q8VCR7                      | Protein ABHD14B                                                      |
| HAPEGTGGccGK + 2 Carbamidomethyl (C)                | 1297.518  | 1297.5101 | 2     | 100.0 | Q91WU5                      | Arsenite methyltransferase                                           |
| LcNPPVNAISPTVITEVRNGLQ K + Carbamidomethyl (C)      | 2519.353  | 2519.3817 | 3     | 96.0  | Q9DBM2                      | Peroxisomal bifunctional enzyme                                      |
| cSGIASAAATAVEVARSTGWT GHVAGTR + Carbamidomethyl (C) | 2743.346  | 2743.3719 | +3;+4 | 60.0  | Q91X91                      | Nicotinate-nucleotide pyrophosphorylase [carboxylating]              |
| FAcHSASLTVR + Carbamidomethyl (C)                   | 1247.6081 | 1247.6127 | +2;+3 | 75.0  | Q99K48                      | Non-POU domain-containing octamer-binding protein                    |
| HLcTPRQDYGVVSGVSEDPD LANR + Carbamidomethyl (C)     | 2783.3297 | 2783.3609 | +3;+4 | 100.0 | O88338                      | Cadherin-16                                                          |
| TIDGQQTIIAcIESHQFQPK + Carbamidomethyl (C)          | 2313.1423 | 2313.1695 | 3     | 84.0  | P47753                      | F-actin-capping protein subunit alpha-1                              |
| MKPLVVFVLGGPGAGKGTQc AR + Carbamidomethyl (C)       | 2242.2079 | 2242.2204 | +3;+4 | 99.0  | Q9DBP5                      | UMP-CMP kinase                                                       |
| cEFQDAYVLLSEK + Carbamidomethyl (C)                 | 1600.7443 | 1600.7498 | +2;+3 | 98.0  | P63038                      | 60 kDa heat shock protein, mitochondrial                             |
| GQKcEFQDAYVLLSEK + Carbamidomethyl (C)              | 1913.9193 | 1913.94   | 3     | 87.0  | P63038                      | 60 kDa heat shock protein, mitochondrial                             |
| LFecSNKTGR + Carbamidomethyl (C)                    | 1210.5764 | 1210.5447 | 2     | 84.0  | O88398                      | Advillin                                                             |
| KTFTAWcNSHLR + Carbamidomethyl (C)                  | 1519.7354 | 1519.7548 | +2;+3 | 100.0 | Q7TPR4,P57780,Q9JI91,O88990 | Alpha-actinin-1,Alpha-actinin-4,Alpha-actinin-2,Alpha-actinin-3      |

|                                                        |           |           |       |       |                                    |                                                                                                                                                                  |
|--------------------------------------------------------|-----------|-----------|-------|-------|------------------------------------|------------------------------------------------------------------------------------------------------------------------------------------------------------------|
| ELPPDQAEYcIAR + Carbamidomethyl (C)                    | 1560.7242 | 1560.7433 | 2     | 87.0  | Q7TPR4,P57780                      | Alpha-actinin-1,Alpha-actinin-4                                                                                                                                  |
| VcNPIITK + Carbamidomethyl (C)                         | 943.5161  | 943.5257  | 2     | 60.0  | P63017                             | Heat shock cognate 71 kDa protein                                                                                                                                |
| cVGVFQHGK + Carbamidomethyl (C)                        | 1030.5019 | 1030.5015 | +2;+3 | 61.0  | P63017,P17156,P16627,P17879,Q61696 | Heat shock cognate 71 kDa protein,Heat shock-related 70 kDa protein 2,Heat shock 70 kDa protein 1-like,Heat shock 70 kDa protein 1B,Heat shock 70 kDa protein 1A |
| SLcAFR + Carbamidomethyl (C)                           | 752.3639  | 752.3679  | 2     | 38.0  | P19096                             | Fatty acid synthase                                                                                                                                              |
| SScTIIPLMKR + Carbamidomethyl (C)                      | 1304.6944 | 1304.7092 | 3     | 59.0  | P19096                             | Fatty acid synthase                                                                                                                                              |
| SFYGTALFLcRR + Carbamidomethyl (C)                     | 1489.75   | 1489.7683 | +2;+3 | 50.0  | P19096                             | Fatty acid synthase                                                                                                                                              |
| VQEVQVSTNKRPLWFcSGMGTQWR + Carbamidomethyl (C)         | 3134.5542 | 3134.5871 | 4     | 43.0  | P19096                             | Fatty acid synthase                                                                                                                                              |
| KLTAIPVSAFcDSK + Carbamidomethyl (C)                   | 1535.8018 | 1535.8141 | +2;+3 | 96.0  | Q71R19                             | Kynurenine--oxoglutarate transaminase 3                                                                                                                          |
| TSLDLYANVIHcK + Carbamidomethyl (C)                    | 1532.7657 | 1532.7691 | +2;+3 | 89.0  | P70404                             | Isocitrate dehydrogenase [NAD] subunit gamma 1, mitochondrial                                                                                                    |
| AcDEGHIIPK + Carbamidomethyl (C)                       | 1138.5441 | 1138.5484 | +2;+3 | 61.0  | Q9JHI5                             | Isovaleryl-CoA dehydrogenase, mitochondrial                                                                                                                      |
| GSNTcELVFEDcKvPAANVLSQESK + 2 Carbamidomethyl (C)      | 2849.3212 | 2849.3379 | 3     | 145.0 | Q9JHI5                             | Isovaleryl-CoA dehydrogenase, mitochondrial                                                                                                                      |
| TFLLDGDEVIITGHcQGDGYR + Carbamidomethyl (C)            | 2365.1009 | 2365.1436 | +2;+3 | 136.0 | P35505                             | Fumarylacetoacetase                                                                                                                                              |
| TFLLDGDEVIITGHcQGDGYRVGFGQcAGK + 2 Carbamidomethyl (C) | 3337.5497 | 3337.5772 | +3;+4 | 106.0 | P35505                             | Fumarylacetoacetase                                                                                                                                              |
| GFcFLEYEDHK + Carbamidomethyl (C)                      | 1443.6129 | 1443.6203 | +2;+3 | 64.0  | Q7TMK9                             | Heterogeneous nuclear ribonucleoprotein Q                                                                                                                        |
| NRGFcFLEYEDHK + Carbamidomethyl (C)                    | 1713.7569 | 1713.7771 | +3;+4 | 45.0  | Q7TMK9                             | Heterogeneous nuclear ribonucleoprotein Q                                                                                                                        |
| ALVDGPcTR + Carbamidomethyl (C)                        | 987.4808  | 987.4891  | 2     | 80.0  | Q9CR57                             | 60S ribosomal protein L14                                                                                                                                        |
| SLAPAFESFcQGNRGLPLLQSEAVK + Carbamidomethyl (C)        | 2872.4541 | 2872.47   | 3     | 111.0 | Q8BH86                             | UPF0317 protein C14orf159 homolog, mitochondrial                                                                                                                 |
| VAGcSVHKGyAFVQYANER + Carbamidomethyl (C)              | 2155.0269 | 2155.047  | +3;+4 | 80.0  | Q64012                             | RNA-binding protein Raly                                                                                                                                         |
| RPGAALDPGcVIAK + Carbamidomethyl (C)                   | 1423.7606 | 1423.7769 | +2;+3 | 79.0  | Q5SWU9                             | Acetyl-CoA carboxylase 1                                                                                                                                         |
| SIFTVcLDKQVPR + Carbamidomethyl (C)                    | 1561.8287 | 1561.8457 | 3     | 79.0  | P47934                             | Carnitine O-acetyltransferase                                                                                                                                    |



|                                                              |           |           |          |       |                                    |                                                                                                                                                                           |
|--------------------------------------------------------------|-----------|-----------|----------|-------|------------------------------------|---------------------------------------------------------------------------------------------------------------------------------------------------------------------------|
| INISEGNcPER + Carbamidomethyl (C)                            | 1287.5877 | 1287.5926 | 2        | 90.0  | Q61990,P57722,P60335               | Poly(rC)-binding protein 2,Poly(rC)-binding protein 3,Poly(rC)-binding protein 1                                                                                          |
| VcHAHPTLSEAFREANLAAAFGKPINF + Carbamidomethyl (C)            | 2967.4814 | 2967.5122 | +3;+4;+5 | 91.0  | O08749                             | Dihydrolipoyl dehydrogenase, mitochondrial                                                                                                                                |
| NSLDcEIVSAK + Carbamidomethyl (C)                            | 1234.5863 | 1234.5996 | 2        | 86.0  | P40124                             | Adenylyl cyclase-associated protein 1                                                                                                                                     |
| cKHFELGGDK + Carbamidomethyl (C)                             | 1189.555  | 1189.5626 | +2;+3    | 87.0  | P83882                             | 60S ribosomal protein L36a                                                                                                                                                |
| LEcVEPNcR + 2 Carbamidomethyl (C)                            | 1243.5325 | 1243.5341 | 2        | 67.0  | P83882                             | 60S ribosomal protein L36a                                                                                                                                                |
| AVIFEDcAVPVANR + Carbamidomethyl (C)                         | 1559.7766 | 1559.7958 | 2        | 101.0 | Q9D7B6                             | Isobutyryl-CoA dehydrogenase, mitochondrial                                                                                                                               |
| TATRLPGcVPAAAPGSYPALS AQAAQEPAAFWGLPAR + Carbamidomethyl (C) | 3848.942  | 3848.9902 | +3;+4    | 113.0 | Q99NB1                             | Acetyl-coenzyme A synthetase 2-like, mitochondrial                                                                                                                        |
| cTTEAEQVEEEKVEK + Carbamidomethyl (C)                        | 1936.8571 | 1936.8766 | 3        | 76.0  | Q8K2J7                             | RELT-like protein 1                                                                                                                                                       |
| ENEFFIVTQTcK + Carbamidomethyl (C)                           | 1514.7075 | 1514.7256 | 2        | 75.0  | O08677                             | Kininogen-1                                                                                                                                                               |
| ScWDEPLSI AVR + Carbamidomethyl (C)                          | 1431.6816 | 1431.6864 | 2        | 83.0  | Q32Q92,Q9QYR9,O55137,Q8BWN8,Q6Q2Z6 | Acyl-coenzyme A thioesterase 6,Acyl-coenzyme A thioesterase 2, mitochondrial,Acyl-coenzyme A thioesterase 1,Acyl-coenzyme A thioesterase 4,Acyl-coenzyme A thioesterase 5 |
| SGTGQQLGQAAEESNccARLccGAR + 4 Carbamidomethyl (C)            | 2740.1534 | 2740.1754 | 3        | 83.0  | Q9JI29                             | Phospholipid scramblase 3                                                                                                                                                 |
| IENLHDVAYKNALANPLYcPDYR + Carbamidomethyl (C)                | 2861.417  | 2861.465  | +3;+4    | 74.0  | Q9DB77                             | Cytochrome b-c1 complex subunit 2, mitochondrial                                                                                                                          |
| NcSSFLIKR + Carbamidomethyl (C)                              | 1123.5808 | 1123.5942 | +2;+3    | 74.0  | P41105                             | 60S ribosomal protein L28                                                                                                                                                 |
| TQLAVcQQR + Carbamidomethyl (C)                              | 1102.5553 | 1102.5664 | 2        | 74.0  | P30416                             | Peptidyl-prolyl cis-trans isomerase FKBP4                                                                                                                                 |
| TLEGPENcLKPK + Carbamidomethyl (C)                           | 1384.702  | 1384.7023 | 3        | 75.0  | Q9ESE1                             | Lipopolysaccharide-responsive and beige-like anchor protein                                                                                                               |
| ccLASASAVKFPEAVQAAGLTPETPAEILALEHK + 2 Carbamidomethyl (C)   | 3646.8375 | 3646.8872 | +3;+4    | 86.0  | Q80W22                             | Threonine synthase-like 2                                                                                                                                                 |
| LTEGcSFR + Carbamidomethyl (C)                               | 968.4386  | 968.4449  | 2        | 77.0  | Q6ZWU9,Q6ZWY3                      | 40S ribosomal protein S27,40S ribosomal protein S27-like                                                                                                                  |
| FVKQDQVciAR + Carbamidomethyl (C)                            | 1362.7078 | 1362.7158 | +2;+3    | 94.0  | Q149F3,Q8R050                      | Eukaryotic peptide chain release factor GTP-binding subunit ERF3B,Eukaryotic peptide chain release factor GTP-binding subunit ERF3A                                       |

|                                                             |           |           |          |       |               |                                                                      |
|-------------------------------------------------------------|-----------|-----------|----------|-------|---------------|----------------------------------------------------------------------|
| SIQcLTVHRNGGK + Carbamidomethyl (C)                         | 1468.7569 | 1468.7698 | +2;+3;+4 | 49.0  | O88342        | WD repeat-containing protein 1                                       |
| cGGLAASAMDELLRR + Carbamidomethyl (C)                       | 1618.7919 | 1618.8093 | 3        | 72.0  | Q99J39        | Malonyl-CoA decarboxylase, mitochondrial                             |
| HIGDGcHLTR + Carbamidomethyl (C)                            | 1164.5458 | 1164.5455 | +2;+3    | 83.0  | Q9DD20        | Methyltransferase-like protein 7B                                    |
| VLEPTWKHIGDGcHLTR + Carbamidomethyl (C)                     | 2018.0156 | 2018.0378 | 5        | 34.0  | Q9DD20        | Methyltransferase-like protein 7B                                    |
| DVTDNRAFGYVcGGEGQHGF<br>FAIK + Carbamidomethyl (C)          | 2715.25   | 2715.2887 | +3;+4    | 71.0  | P98078        | Disabled homolog 2                                                   |
| SNPGGFGIAPHcLDEGTVR + Carbamidomethyl (C)                   | 1982.9269 | 1982.9412 | 3        | 70.0  | Q9CXS4        | Centromere protein V                                                 |
| QVIDcQLADVNNLGKYR + Carbamidomethyl (C)                     | 2005.0051 | 2005.031  | 3        | 70.0  | Q9CPY7        | Cytosol aminopeptidase                                               |
| SLAGSScVR + Carbamidomethyl (C)                             | 935.4495  | 935.4536  | 2        | 69.0  | O08581        | Potassium channel subfamily K member 1                               |
| IcDDELILIK + Carbamidomethyl (C)                            | 1230.653  | 1230.6656 | 2        | 69.0  | P11983        | T-complex protein 1 subunit alpha                                    |
| GPGLFFILPcTDSLIIK + Carbamidomethyl (C)                     | 1776.9484 | 1776.9613 | 2        | 74.0  | P54116        | Erythrocyte band 7 integral membrane protein                         |
| ALSALcDPSR + Carbamidomethyl (C)                            | 1088.5284 | 1088.5323 | 2        | 77.0  | Q9DC37        | Major facilitator superfamily domain-containing protein 1            |
| cFNDFIKSLTLVSQK + Carbamidomethyl (C)                       | 1798.9288 | 1798.9472 | 3        | 72.0  | Q9QXW9        | Large neutral amino acids transporter small subunit 2                |
| SNGGNLLcAVDESNdhVLSVW<br>DWAK + Carbamidomethyl (C)         | 2785.2766 | 2785.3123 | 3        | 123.0 | Q7TNG5        | Echinoderm microtubule-associated protein-like 2                     |
| HTSYTcIccSGENAAVLHYGHA<br>GAPNDR + 3<br>Carbamidomethyl (C) | 3253.3764 | 3117.3591 | 4        | 89.0  | Q11136        | Xaa-Pro dipeptidase                                                  |
| VWcTSLHPELVR + Carbamidomethyl (C)                          | 1495.7606 | 1495.766  | +2;+3    | 71.0  | Q91WR5        | Aldo-keto reductase family 1 member C21                              |
| VcADLIR + Carbamidomethyl (C)                               | 845.4429  | 845.446   | 2        | 53.0  | P60867        | 40S ribosomal protein S20                                            |
| SLEKvcADLIR + Carbamidomethyl (C)                           | 1302.6965 | 1302.7104 | +2;+3    | 61.0  | P60867        | 40S ribosomal protein S20                                            |
| GSSNFcVK + Carbamidomethyl (C)                              | 897.4015  | 897.409   | 2        | 61.0  | Q80SW1        | Putative adenosylhomocysteinase 2                                    |
| GSSNFcVKNIK + Carbamidomethyl (C)                           | 1252.6234 | 1252.6326 | +2;+3    | 48.0  | Q80SW1        | Putative adenosylhomocysteinase 2                                    |
| LcVPAMNVNDSVTK + Carbamidomethyl (C)                        | 1546.7484 | 1546.7588 | 2        | 70.0  | Q80SW1,Q68FL4 | Putative adenosylhomocysteinase 2, Putative adenosylhomocysteinase 3 |
| VDcTANTNTcNK + 2<br>Carbamidomethyl (C)                     | 1464.5973 | 1464.6018 | 2        | 113.0 | P27773        | Protein disulfide-isomerase A3                                       |
| cPDIAIQLAGTKK + Carbamidomethyl (C)                         | 1413.765  | 1413.7776 | +2;+3    | 117.0 | P51855        | Glutathione synthetase                                               |
| TTDGYLLRlFcVGFVK + Carbamidomethyl (C)                      | 1889.971  | 1889.9933 | 3        | 68.0  | P97351        | 40S ribosomal protein S3a                                            |

|                                                     |           |           |          |       |        |                                                          |
|-----------------------------------------------------|-----------|-----------|----------|-------|--------|----------------------------------------------------------|
| VcIVGSGNWGSAIAKIVGSNAGR + Carbamidomethyl (C)       | 2272.1746 | 2272.1858 | 3        | 100.0 | P13707 | Glycerol-3-phosphate dehydrogenase [NAD(+)], cytoplasmic |
| cTSIITEDEKGHLLHGR + Carbamidomethyl (C)             | 1964.9738 | 1964.9814 | +3;+4;+5 | 101.0 | Q9WV54 | Acid ceramidase                                          |
| VDRGENQILScR + Carbamidomethyl (C)                  | 1445.7045 | 1445.7181 | +2;+3    | 75.0  | Q8VHL0 | Urea transporter 1                                       |
| IEIQAPPGVPVGYVTQTWHPcLPK + Carbamidomethyl (C)      | 2686.3942 | 2686.4034 | 3        | 69.0  | Q9JJ00 | Phospholipid scramblase 1                                |
| AAGFPTASVcR + Carbamidomethyl (C)                   | 1135.5444 | 1135.5523 | 2        | 94.0  | Q5U5V2 | Hydroxylysine kinase                                     |
| ALLGYADNQcKLELQGIQGAVDHAAAFGR + Carbamidomethyl (C) | 3085.5403 | 3085.5733 | 4        | 67.0  | Q9CPV4 | Glyoxalase domain-containing protein 4                   |
| AKIGLIQFcLSAPK + Carbamidomethyl (C)                | 1544.8748 | 1544.8895 | 3        | 74.0  | P80315 | T-complex protein 1 subunit delta                        |
| AVVVHWGPcHFLEK + Carbamidomethyl (C)                | 1677.845  | 1677.8524 | +3;+4    | 60.0  | Q9JIF9 | Signal peptide peptidase-like 2A                         |
| VLIVEPEGIKQEHTFSSLFcASDAEISEK + Carbamidomethyl (C) | 3262.6067 | 3262.6465 | +3;+4    | 105.0 | P28665 | Murinoglobulin-1                                         |
| VHPNSVHicAVAVEYEAK + Carbamidomethyl (C)            | 2021.9993 | 2022.0093 | +3;+4    | 81.0  | P37040 | NADPH--cytochrome P450 reductase                         |
| ALTNHTVYcSTK + Carbamidomethyl (C)                  | 1393.666  | 1393.6829 | +2;+3    | 65.0  | Q91X52 | L-xylulose reductase                                     |
| cLTTNEYDGHTTYPHQYD + Carbamidomethyl (C)            | 2300.9281 | 2300.9613 | 3        | 64.0  | Q923D2 | Flavin reductase (NADPH)                                 |
| VRLGDVISIQcPDVK + Carbamidomethyl (C)               | 1794.9662 | 1794.987  | 3        | 69.0  | Q01853 | Transitional endoplasmic reticulum ATPase                |
| VVETDPSPYcIVAPDVIHcEGEPIKR + 2 Carbamidomethyl (C)  | 3148.5209 | 3148.5532 | +3;+4    | 58.0  | Q01853 | Transitional endoplasmic reticulum ATPase                |
| IVEVNGVcMEGK + Carbamidomethyl (C)                  | 1333.637  | 1333.6508 | 2        | 64.0  | P70441 | Na(+)/H(+) exchange regulatory cofactor NHE-RF1          |
| LGCQVcLTK + 2 Carbamidomethyl (C)                   | 1145.5573 | 1145.5628 | 2        | 76.0  | P46656 | Adrenodoxin, mitochondrial                               |
| RYcAGEENWVDSR + Carbamidomethyl (C)                 | 1640.7001 | 1640.7092 | +2;+3    | 96.0  | P98197 | Probable phospholipid-transporting ATPase IH             |
| RVGLicEGAPVR + Carbamidomethyl (C)                  | 1325.7238 | 1325.7297 | +2;+3    | 80.0  | Q8CFA2 | Aminomethyltransferase, mitochondrial                    |
| cDPAGYYcGFK + 2 Carbamidomethyl (C)                 | 1404.5479 | 1404.5615 | 2        | 63.0  | Q9QUM9 | Proteasome subunit alpha type-6                          |
| LSTAScPTPK + Carbamidomethyl (C)                    | 1060.5223 | 1060.5337 | 2        | 61.0  | Q8BUV3 | Gephyrin                                                 |
| STEPcAHLVSSIGVGTAEQNR + Carbamidomethyl (C)         | 2424.2067 | 2424.2262 | +2;+3;+4 | 160.0 | O35215 | D-dopachrome decarboxylase                               |
| VDcDQHSDIAQR + Carbamidomethyl (C)                  | 1442.6209 | 1442.6324 | +2;+3    | 104.0 | Q9D1Q6 | Endoplasmic reticulum resident protein 44                |
| LGYAGNTEPQFIIPScIAIK + Carbamidomethyl (C)          | 2191.1347 | 2191.1742 | 2        | 60.0  | Q99JY9 | Actin-related protein 3                                  |
| VcGGFACSR + 2 Carbamidomethyl (C)                   | 1012.4219 | 1012.4209 | 2        | 63.0  | Q9CQ88 | Tetraspanin-31                                           |

|                                                     |           |           |          |       |                      |                                                                                    |
|-----------------------------------------------------|-----------|-----------|----------|-------|----------------------|------------------------------------------------------------------------------------|
| AVSRELLHLGcNVVIASR + Carbamidomethyl (C)            | 1993.0891 | 1993.1015 | +3;+4    | 90.0  | Q99M27               | Peroxisomal trans-2-enoyl-CoA reductase                                            |
| GLcGAIHSSVAK + Carbamidomethyl (C)                  | 1198.6128 | 1198.6165 | +2;+3    | 74.0  | Q91VR2               | ATP synthase subunit gamma, mitochondrial                                          |
| cVVSPTGR + Carbamidomethyl (C)                      | 874.4331  | 874.4352  | 2        | 62.0  | Q3UFF7               | Lysophospholipase-like protein 1                                                   |
| TVVPccSGPK + 2 Carbamidomethyl (C)                  | 1171.5366 | 1171.5491 | 2        | 69.0  | P28271               | Cytoplasmic aconitate hydratase                                                    |
| LAccSGK + 2 Carbamidomethyl (C)                     | 862.3677  | 862.3755  | 2        | 47.0  | Q8VHF2               | Cadherin-related family member 5                                                   |
| HRLAccSGK + 2 Carbamidomethyl (C)                   | 1155.5277 | 1155.5332 | 3        | 38.0  | Q8VHF2               | Cadherin-related family member 5                                                   |
| TDFQQGcAK + Carbamidomethyl (C)                     | 1053.455  | 1053.4542 | 2        | 62.0  | Q9DCM0               | Persulfide dioxygenase ETHE1, mitochondrial                                        |
| YSEANRIIEcEQaER + Carbamidomethyl (C)               | 2011.8541 | 2011.8747 | 3        | 57.0  | Q8R180               | ERO1-like protein alpha                                                            |
| NISFPATGcQK + Carbamidomethyl (C)                   | 1221.5812 | 1221.5931 | 2        | 66.0  | P62754               | 40S ribosomal protein S6                                                           |
| TFQDcYSSKFLSHWDHITR + Carbamidomethyl (C)           | 2427.1066 | 2427.129  | +4;+5    | 46.0  | Q8BH95               | Enoyl-CoA hydratase, mitochondrial                                                 |
| GSEPHLAYcLQQEGDRA + Carbamidomethyl (C)             | 1929.8639 | 1929.8857 | 3        | 61.0  | O70572               | Sphingomyelin phosphodiesterase 2                                                  |
| TSEVNcYR + Carbamidomethyl (C)                      | 1027.4393 | 1027.446  | 2        | 59.0  | P53996               | Cellular nucleic acid-binding protein                                              |
| cGETGHVAINcSK + 2 Carbamidomethyl (C)               | 1499.6497 | 1499.6588 | +2;+3    | 76.0  | P53996               | Cellular nucleic acid-binding protein                                              |
| KLYDYcDIPLcASASSFecGKPK + 3 Carbamidomethyl (C)     | 3161.4508 | 3161.4956 | 4        | 55.0  | P20918               | Plasminogen                                                                        |
| VLLAAAVcTK + Carbamidomethyl (C)                    | 1044.6001 | 1044.6104 | 2        | 79.0  | Q5XJY5               | Coatomer subunit delta                                                             |
| GYVSDIDcR + Carbamidomethyl (C)                     | 1083.4655 | 1083.465  | 2        | 33.0  | P97494               | Glutamate--cysteine ligase catalytic subunit                                       |
| LGcPGFTLPEHRPNPEEGGASK + Carbamidomethyl (C)        | 2349.1172 | 2349.113  | +2;+3;+4 | 82.0  | P97494               | Glutamate--cysteine ligase catalytic subunit                                       |
| IVGGFNcEK + Carbamidomethyl (C)                     | 1022.4855 | 1022.486  | 2        | 64.0  | Q61759,P15946,P15947 | Kallikrein 1-related peptidase b21,Kallikrein 1-related peptidase b11,Kallikrein-1 |
| SKEPNPGHLAIAQcEAR + Carbamidomethyl (C)             | 1876.9213 | 1876.9399 | 3        | 53.0  | Q8K2C6               | NAD-dependent protein deacylase sirtuin-5, mitochondrial                           |
| KGDEcELLGHNK + Carbamidomethyl (C)                  | 1398.6561 | 1398.6657 | +2;+3    | 102.0 | Q8BFR5               | Elongation factor Tu, mitochondrial                                                |
| HYAHTDcPGHADYVK + Carbamidomethyl (C)               | 1769.758  | 1769.7615 | +2;+3;+4 | 93.0  | Q8BFR5               | Elongation factor Tu, mitochondrial                                                |
| SSERALVTK                                           | 989.5505  | 989.5413  | 2        | 52.0  | Q8BKF1               | DNA-directed RNA polymerase, mitochondrial                                         |
| TGcTFPEKPDFH + Carbamidomethyl (C)                  | 1434.6238 | 1434.6339 | +2;+3    | 70.0  | P55264               | Adenosine kinase                                                                   |
| TLVLDcHYPEDEIGHDEAESDI + FSIK + Carbamidomethyl (C) | 3160.4183 | 3160.4389 | +2;+3;+4 | 93.0  | O35658               | Complement component 1 Q subcomponent-binding protein, mitochondrial               |

|                                                 |           |           |          |      |               |                                                                          |
|-------------------------------------------------|-----------|-----------|----------|------|---------------|--------------------------------------------------------------------------|
| cSLYTcTYR + 2<br>Carbamidomethyl (C)            | 1222.5111 | 1222.5228 | 2        | 60.0 | Q9QZA0        | Carbonic anhydrase 5B, mitochondrial                                     |
| LDPPNRPETsFLWFTNPcK +<br>Carbamidomethyl (C)    | 2318.1154 | 2318.1278 | +2;+3    | 52.0 | Q69ZN7        | Myoferlin                                                                |
| LcSDQSLN +<br>Carbamidomethyl (C)               | 935.4018  | 935.4181  | 2        | 54.0 | O88492        | Perilipin-4                                                              |
| ALRGLGLSPDLIVcR +<br>Carbamidomethyl (C)        | 1638.9239 | 1638.9385 | 3        | 50.0 | P70303        | CTP synthase 2                                                           |
| TGAFWR                                          | 736.3657  | 736.3745  | 2        | 30.0 | P09470        | Angiotensin-converting enzyme                                            |
| AAGHTGPLHKcDIYQSK +<br>Carbamidomethyl (C)      | 1881.9156 | 1881.9335 | +2;+3;+4 | 72.0 | P09470        | Angiotensin-converting enzyme                                            |
| LAQLIKESL                                       | 1013.6121 | 1013.6228 | 2        | 49.0 | Q9WVM8        | Kynurenine/alpha-aminoadipate<br>aminotransferase, mitochondrial         |
| cTLPLTGK +<br>Carbamidomethyl (C)               | 888.4739  | 888.4736  | 2        | 52.0 | Q9D0K2        | Succinyl-CoA:3-ketoacid coenzyme A<br>transferase 1, mitochondrial       |
| NFNLPMcK +<br>Carbamidomethyl (C)               | 1022.4677 | 1022.4718 | +1;+2    | 47.0 | Q9D0K2        | Succinyl-CoA:3-ketoacid coenzyme A<br>transferase 1, mitochondrial       |
| SISYIQPNTVcFWDRR +<br>Carbamidomethyl (C)       | 2040.984  | 2041.0013 | 3        | 48.0 | O35682        | Myeloid-associated differentiation<br>marker                             |
| AcTIAIR + Carbamidomethyl<br>(C)                | 803.4323  | 803.4344  | 2        | 49.0 | Q9R0H0        | Peroxisomal acyl-coenzyme A oxidase 1                                    |
| LcDFNPK + Carbamidomethyl<br>(C)                | 892.4113  | 892.4149  | 2        | 40.0 | O08585,Q6IRU5 | Clathrin light chain A,Clathrin light chain<br>B                         |
| VARLcDFNPK +<br>Carbamidomethyl (C)             | 1218.6179 | 1218.6324 | +2;+3    | 46.0 | O08585        | Clathrin light chain A                                                   |
| AKLWAcNFcYQR + 2<br>Carbamidomethyl (C)         | 1683.765  | 1683.7807 | 3        | 48.0 | Q01405        | Protein transport protein Sec23A                                         |
| VHFTYEIADcNREYNQAFGNLK<br>+ Carbamidomethyl (C) | 2688.2391 | 2688.2709 | 3        | 48.0 | Q9JLB4        | Cubilin                                                                  |
| EASGSAcDLPR +<br>Carbamidomethyl (C)            | 1161.5084 | 1161.5108 | 2        | 58.0 | Q6PDY2        | 2-aminoethanethiol dioxygenase                                           |
| YIDcDLNR +<br>Carbamidomethyl (C)               | 1067.4706 | 1067.4807 | 2        | 47.0 | Q8R3P0        | Aspartoacylase                                                           |
| SSSEEAScYR +<br>Carbamidomethyl (C)             | 1174.456  | 1174.4629 | 2        | 59.0 | P0C8K7        | Small integral membrane protein 1                                        |
| HcDLQVR +<br>Carbamidomethyl (C)                | 926.4392  | 926.444   | 2        | 47.0 | P23116        | Eukaryotic translation initiation factor 3<br>subunit A                  |
| ISPFHQTYcQR +<br>Carbamidomethyl (C)            | 1564.7093 | 1564.7217 | 3        | 55.0 | P63085,Q63844 | Mitogen-activated protein kinase<br>1,Mitogen-activated protein kinase 3 |
| GLcPLAPR +<br>Carbamidomethyl (C)               | 882.4745  | 882.479   | 2        | 47.0 | Q9DCQ2        | Putative L-aspartate dehydrogenase                                       |
| EKPGPEDNLHDQcSPWK +<br>Carbamidomethyl (C)      | 2035.9058 | 2035.9109 | 3        | 48.0 | P35846        | Folate receptor alpha                                                    |

|                                                                       |           |           |       |      |               |                                                                                   |
|-----------------------------------------------------------------------|-----------|-----------|-------|------|---------------|-----------------------------------------------------------------------------------|
| VLEVASGGQHAHFAQAFPN<br>AEWQPSVDVQRcLDSIAATTR<br>+ Carbamidomethyl (C) | 4537.1469 | 4537.2281 | 4     | 46.0 | Q9DCS2        | UPF0585 protein C16orf13 homolog                                                  |
| LGIPAEKVNPLGGAIALGHPLG<br>cTGAR + Carbamidomethyl<br>(C)              | 2638.4377 | 2638.4665 | +3;+4 | 84.0 | Q8VCH0,Q921H8 | 3-ketoacyl-CoA thiolase B, peroxisomal,3-<br>ketoacyl-CoA thiolase A, peroxisomal |
| ATLcYARPEPR +<br>Carbamidomethyl (C)                                  | 1332.6608 | 1332.6659 | +2;+3 | 44.0 | Q60825        | Sodium-dependent phosphate transport<br>protein 2A                                |
| VLcLPK + Carbamidomethyl<br>(C)                                       | 728.4255  | 728.4345  | 2     | 46.0 | Q8BV79        | TPR and ankyrin repeat-containing<br>protein 1                                    |
| cLGNPER +<br>Carbamidomethyl (C)                                      | 844.3861  | 844.3915  | 2     | 46.0 | P50516        | V-type proton ATPase catalytic subunit A                                          |
| YTcSFcGK + 2<br>Carbamidomethyl (C)                                   | 1089.426  | 1089.4372 | 2     | 45.0 | P61514        | 60S ribosomal protein L37a                                                        |
| cGVISPR + Carbamidomethyl<br>(C)                                      | 787.4011  | 787.4055  | 2     | 48.0 | P62245        | 40S ribosomal protein S15a                                                        |
| QVLIRPcSK +<br>Carbamidomethyl (C)                                    | 1099.6172 | 1099.6251 | +2;+3 | 41.0 | P62245        | 40S ribosomal protein S15a                                                        |
| cLIATGGTPR +<br>Carbamidomethyl (C)                                   | 1044.5386 | 1044.5425 | 2     | 51.0 | Q9Z0X1        | Apoptosis-inducing factor 1,<br>mitochondrial                                     |
| FAcFER + Carbamidomethyl<br>(C)                                       | 828.3589  | 828.3667  | 2     | 48.0 | Q8VEM8        | Phosphate carrier protein, mitochondrial                                          |
| KcSTPEEIK +<br>Carbamidomethyl (C)                                    | 1090.5328 | 1090.535  | +2;+3 | 70.0 | Q9R0P5        | Dextrin                                                                           |
| cAYVYK + Carbamidomethyl<br>(C)                                       | 802.3683  | 802.3681  | 2     | 45.0 | O55142        | 60S ribosomal protein L35a                                                        |
| ScTVEAVR +<br>Carbamidomethyl (C)                                     | 920.4386  | 920.4397  | 2     | 46.0 | Q9DC50        | Peroxisomal carnitine O-<br>octanoyltransferase                                   |
| LRDNGLLAKPTHGDIIR                                                     | 1888.0643 | 1888.0784 | 4     | 42.0 | P29758        | Ornithine aminotransferase,<br>mitochondrial                                      |
| APDTcccSATALRR + 3<br>Carbamidomethyl (C)                             | 1637.7072 | 1637.7145 | 3     | 41.0 | Q80ZD3        | Sodium-independent sulfate anion<br>transporter                                   |
| RGVAcTQPR +<br>Carbamidomethyl (C)                                    | 1043.5294 | 1043.5281 | 2     | 45.0 | O35286        | Pre-mRNA-splicing factor ATP-dependent<br>RNA helicase DHX15                      |
| GcVITISGR +<br>Carbamidomethyl (C)                                    | 961.5015  | 961.5105  | 2     | 41.0 | Q91V12        | Cytosolic acyl coenzyme A thioester<br>hydrolase                                  |
| ALFHSVK                                                               | 800.4545  | 800.436   | 2     | 40.0 | P53811        | Phosphatidylinositol transfer protein beta<br>isoform                             |
| ATGHSGGGcISQGQSYDTDKG<br>R + Carbamidomethyl (C)                      | 2237.972  | 2237.9741 | 4     | 40.0 | Q8K274        | Ketosamine-3-kinase                                                               |
| YNLGAPVAGTcYQAEWDDYV<br>PKLYEQLSGK +<br>Carbamidomethyl (C)           | 3434.6129 | 3434.6662 | 3     | 40.0 | P70296        | Phosphatidylethanolamine-binding<br>protein 1                                     |

|                                                                            |           |           |          |       |               |                                                                                         |
|----------------------------------------------------------------------------|-----------|-----------|----------|-------|---------------|-----------------------------------------------------------------------------------------|
| NTNDANScQIIPQNQVNR + Carbamidomethyl (C)                                   | 2198.0498 | 2198.0626 | +2;+3    | 182.0 | Q61598,P50396 | Rab GDP dissociation inhibitor beta,Rab GDP dissociation inhibitor alpha                |
| SNWEAGNTFTcSVLHEGLHNNH HTEK + Carbamidomethyl (C)                          | 2904.2998 | 2904.3297 | 4        | 56.0  | P01868,P01869 | Ig gamma-1 chain C region secreted form,Ig gamma-1 chain C region, membrane-bound form  |
| FAVcAR + Carbamidomethyl (C)                                               | 722.3534  | 722.3604  | 2        | 39.0  | O88533        | Aromatic-L-amino-acid decarboxylase                                                     |
| cHTPPLYR + Carbamidomethyl (C)                                             | 1042.5018 | 1042.5121 | +2;+3    | 50.0  | P62717        | 60S ribosomal protein L18a                                                              |
| EYRDLTTAGAVTQcYR + Carbamidomethyl (C)                                     | 1902.8894 | 1902.9044 | 3        | 43.0  | P62717        | 60S ribosomal protein L18a                                                              |
| VETAEVcSRPQELPQSPR + Carbamidomethyl (C)                                   | 2082.0164 | 2082.0265 | 3        | 64.0  | Q76LS9        | Ubiquitin carboxyl-terminal hydrolase MINDY-1                                           |
| LALDcSGQ + Carbamidomethyl (C)                                             | 862.3855  | 862.3744  | 2        | 38.0  | Q3U2P1        | Protein transport protein Sec24A                                                        |
| TTYPCsCEK + 2 Carbamidomethyl (C)                                          | 1212.4791 | 1212.4936 | 2        | 38.0  | P40237        | CD82 antigen                                                                            |
| TEIQVNCpK + Carbamidomethyl (C)                                            | 1087.5332 | 1087.5418 | 2        | 57.0  | O09117        | Synaptophysin-like protein 1                                                            |
| GcFEcckK + 3 Carbamidomethyl (C)                                           | 1072.414  | 1072.4257 | 2        | 37.0  | P35802,P35803 | Neuronal membrane glycoprotein M6-a,Neuronal membrane glycoprotein M6-b                 |
| VGEFchSR + Carbamidomethyl (C)                                             | 990.4342  | 990.4418  | 3        | 36.0  | Q02053        | Ubiquitin-like modifier-activating enzyme 1                                             |
| GAcAAYDNDALR + Carbamidomethyl (C)                                         | 1387.5826 | 1387.6013 | 2        | 36.0  | Q9EPT5        | Solute carrier organic anion transporter family member 2A1                              |
| ScAHDWVYE + Carbamidomethyl (C)                                            | 1165.4499 | 1165.4595 | 2        | 45.0  | Q01768        | Nucleoside diphosphate kinase B                                                         |
| NcTYTQVQTR + Carbamidomethyl (C)                                           | 1269.5772 | 1269.5878 | 2        | 35.0  | Q9QVN7,P10711 | Transcription elongation factor A protein 2,Transcription elongation factor A protein 1 |
| ILQKYNHcR + Carbamidomethyl (C)                                            | 1230.6291 | 1230.6357 | +2;+3    | 57.0  | Q91ZJ5        | UTP--glucose-1-phosphate uridylyltransferase                                            |
| ELHDVDLAEVKPLVEKGESITG LLQEFDVQEQDIETLHGSLHVT LcGTPK + Carbamidomethyl (C) | 5565.8189 | 5565.9097 | 6        | 35.0  | Q62433        | Protein NDRG1                                                                           |
| cGHTNNLRPK + Carbamidomethyl (C)                                           | 1195.588  | 1195.5942 | +2;+3    | 43.0  | P62984        | Ubiquitin-60S ribosomal protein L40                                                     |
| YHTINGHNcEVKK + Carbamidomethyl (C)                                        | 1598.7623 | 1598.7675 | +2;+3;+4 | 45.0  | Q8BG05        | Heterogeneous nuclear ribonucleoprotein A3                                              |

|                                                |           |           |          |       |               |                                                                |
|------------------------------------------------|-----------|-----------|----------|-------|---------------|----------------------------------------------------------------|
| VYAVYNSVKGCSE                                  | 1504.6868 | 1504.6859 | 3        | 33.0  | Q6NWW9        | Fibronectin type III domain-containing protein 3B              |
| AcQVYIQHTR + Carbamidomethyl (C)               | 1274.619  | 1274.6313 | 3        | 33.0  | Q9JJ28        | Protein flightless-1 homolog                                   |
| VILITPPPLcEAAWEKEcVLK + 2 Carbamidomethyl (C)  | 2533.3324 | 2533.3734 | 3        | 76.0  | Q9DB29        | Isoamyl acetate-hydrolyzing esterase 1 homolog                 |
| GPcIYNEDNGIIKAFR + Carbamidomethyl (C)         | 1978.9935 | 1979.0139 | 3        | 32.0  | Q9D8E6        | 60S ribosomal protein L4                                       |
| DGSVKcTHQPcLIK + 2 Carbamidomethyl (C)         | 1709.8229 | 1709.8643 | 3        | 32.0  | Q80TE3        | E3 ubiquitin-protein ligase MARCH4                             |
| VSCAAVPMIACASLISITK                            | 1976.0508 | 1976.1011 | 3        | 31.0  | Q9DC58        | DNA damage-regulated autophagy modulator protein 1             |
| VAPMKGQVcVVTGASR + Carbamidomethyl (C)         | 1658.8597 | 1658.8683 | 3        | 56.0  | Q99L04        | Dehydrogenase/reductase SDR family member 1                    |
| VAVTTVVSSTPSVVMSTVAQG VSTSAIK                  | 2705.4521 | 2705.3624 | 3        | 31.0  | Q8BMB0        | BRCA2-interacting transcriptional repressor EMSY               |
| ALEATTEHIRQELAVFcSPEPPAK + Carbamidomethyl (C) | 2693.3483 | 2693.3701 | 4        | 31.0  | P26039        | Talin-1                                                        |
| SLNPGTIYPVLPK                                  | 1397.7918 | 1397.807  | 2        | 30.0  | Q5U4D8        | Sodium-dependent multivitamin transporter                      |
| GKHYYEVScHDQGLcR + 2 Carbamidomethyl (C)       | 2075.8942 | 2075.9081 | 4        | 30.0  | Q91VR5        | ATP-dependent RNA helicase DDX1                                |
| MENFTALFGAQ                                    | 1227.5594 | 1227.5371 | 2        | 32.0  | Q8C150        | Mediator of RNA polymerase II transcription subunit 19         |
| SLcHSDFRK + Carbamidomethyl (C)                | 1148.5397 | 1148.5403 | 3        | 37.0  | Q99KB8        | Hydroxyacylglutathione hydrolase, mitochondrial                |
| ScYEDGWLK + Carbamidomethyl (C)                | 1269.57   | 1269.5761 | 2        | 52.0  | Q91WK5        | Glycine cleavage system H protein, mitochondrial               |
| HFcPNVPIILVGNKK + Carbamidomethyl (C)          | 1734.9603 | 1734.9815 | +2;+3;+4 | 112.0 | Q9QUI0,Q62159 | Transforming protein RhoA,Rho-related GTP-binding protein RhoC |
| QATLQGLLAGCFLFISR                              | 1950.0761 | 1950.0116 | +2;+3    | 43.0  | Q9EPE9        | Manganese-transporting ATPase 13A1                             |
| SVELEDVKFHQcVR + Carbamidomethyl (C)           | 1744.8567 | 1744.8657 | +3;+4    | 40.0  | Q9WVP1,P35585 | AP-1 complex subunit mu-2,AP-1 complex subunit mu-1            |
| FQPHSGQEDLFSccQRK + 2 Carbamidomethyl (C)      | 2122.9313 | 2122.9577 | 3        | 50.0  | Q6PDC8        | Major facilitator superfamily domain-containing protein 4A     |
| cPNcGTHYK + 2 Carbamidomethyl (C)              | 1203.4801 | 1203.4817 | +2;+3    | 55.0  | P19536        | Cytochrome c oxidase subunit 5B, mitochondrial                 |
| SKGLcVAKPTR + Carbamidomethyl (C)              | 1215.6758 | 1215.6784 | +2;+3;+4 | 61.0  | P01029        | Complement C4-B                                                |



|                                                   |           |           |          |       |               |                                                            |
|---------------------------------------------------|-----------|-----------|----------|-------|---------------|------------------------------------------------------------|
| YFAGWcDKIQGATIPINQARP<br>NR + Carbamidomethyl (C) | 2675.3391 | 2675.3641 | +3;+4    | 48.0  | Q8R0Y6        | Cytosolic 10-formyltetrahydrofolate<br>dehydrogenase       |
| IHHEDGYSEEEcR +<br>Carbamidomethyl (C)            | 1635.6835 | 1635.6947 | 3        | 69.0  | P08752        | Guanine nucleotide-binding protein G(i)<br>subunit alpha-2 |
| LPcIYR + Carbamidomethyl<br>(C)                   | 820.4265  | 820.4273  | 2        | 48.0  | P17563,Q63836 | Selenium-binding protein 1,Selenium-<br>binding protein 2  |
| cALSSNIQR +<br>Carbamidomethyl (C)                | 1047.5131 | 1047.5138 | 2        | 95.0  | P17563,Q63836 | Selenium-binding protein 1,Selenium-<br>binding protein 2  |
| YPGGdcSSDIWI +<br>Carbamidomethyl (C)             | 1368.5656 | 1368.5734 | 2        | 53.0  | P17563,Q63836 | Selenium-binding protein 1,Selenium-<br>binding protein 2  |
| EEIVYLPCIYR                                       | 1396.706  | 1396.7085 | +2;+3    | 69.0  | P17563,Q63836 | Selenium-binding protein 1,Selenium-<br>binding protein 2  |
| cGPGYSTPLEAMK +<br>Carbamidomethyl (C)            | 1409.6319 | 1409.6396 | 2        | 115.0 | P17563        | Selenium-binding protein 1                                 |
| EEIVYLPcIYR +<br>Carbamidomethyl (C)              | 1453.7275 | 1453.7335 | +2;+3    | 70.0  | P17563,Q63836 | Selenium-binding protein 1,Selenium-<br>binding protein 2  |
| TQGFVGCALSSNIQR +<br>Carbamidomethyl (C)          | 1636.7991 | 1636.8267 | 2        | 127.0 | P17563,Q63836 | Selenium-binding protein 1,Selenium-<br>binding protein 2  |
| GPREEIVYLPCIYR                                    | 1706.8814 | 1706.8967 | +2;+3    | 94.0  | P17563,Q63836 | Selenium-binding protein 1,Selenium-<br>binding protein 2  |
| GPREEIVYLPcIYR +<br>Carbamidomethyl (C)           | 1763.9028 | 1763.9137 | +2;+3    | 100.0 | P17563,Q63836 | Selenium-binding protein 1,Selenium-<br>binding protein 2  |
| PSATQGFVGCALSSNIQR                                | 1834.8996 | 1834.9222 | 2        | 166.0 | P17563,Q63836 | Selenium-binding protein 1,Selenium-<br>binding protein 2  |
| PSATQGFVGCALSSNIQR +<br>Carbamidomethyl (C)       | 1891.9211 | 1891.9402 | 2        | 189.0 | P17563,Q63836 | Selenium-binding protein 1,Selenium-<br>binding protein 2  |
| DELHHSGWNTcSScFGDSTK +<br>2 Carbamidomethyl (C)   | 2323.9223 | 2323.9285 | 3        | 84.0  | P17563,Q63836 | Selenium-binding protein 1,Selenium-<br>binding protein 2  |
| FLHDPSATQGFVGCALSSNIQR                            | 2347.1379 | 2347.1664 | +2;+3;+4 | 176.0 | P17563,Q63836 | Selenium-binding protein 1,Selenium-<br>binding protein 2  |
| FLHDPSATQGFVGCALSSNIQR<br>+ Carbamidomethyl (C)   | 2404.1594 | 2404.1844 | +2;+3;+4 | 156.0 | P17563,Q63836 | Selenium-binding protein 1,Selenium-<br>binding protein 2  |
| FLHDPSATQGFVGCALSSNIQR<br>FYK                     | 2785.3646 | 2785.3816 | +3;+4    | 161.0 | P17563,Q63836 | Selenium-binding protein 1,Selenium-<br>binding protein 2  |

|                                                            |           |           |          |       |               |                                                       |
|------------------------------------------------------------|-----------|-----------|----------|-------|---------------|-------------------------------------------------------|
| FLHDPSATQGFVGCALSSNIQR<br>FYK + Carbamidomethyl (C)        | 2842.3861 | 2842.4177 | +3;+4    | 153.0 | P17563,Q63836 | Selenium-binding protein 1,Selenium-binding protein 2 |
| EEIVYLPciYRNTGTEAPDYLAT<br>VDVDPK + Carbamidomethyl<br>(C) | 3340.6173 | 3340.6543 | 3        | 67.0  | P17563        | Selenium-binding protein 1                            |
| VDETYVPK                                                   | 949.4757  | 949.4821  | 2        | 58.0  | P07724        | Serum albumin                                         |
| TNcDLYEK +<br>Carbamidomethyl (C)                          | 1041.4437 | 1041.4453 | 2        | 62.0  | P07724        | Serum albumin                                         |
| LQTcCDKPLLK +<br>Carbamidomethyl (C)                       | 1317.6785 | 1317.6849 | +2;+3    | 79.0  | P07724        | Serum albumin                                         |
| LQTCCDKPLLK                                                | 1388.752  | 1388.7549 | +2;+3;+4 | 73.0  | P07724        | Serum albumin                                         |
| YMcENQATISSK +<br>Carbamidomethyl (C)                      | 1430.617  | 1430.6301 | 2        | 104.0 | P07724        | Serum albumin                                         |
| LQTcCDKPLLK +<br>Carbamidomethyl (C)                       | 1445.7734 | 1445.7874 | +2;+3;+4 | 77.0  | P07724        | Serum albumin                                         |
| RPCFSALTVEDETYVPK                                          | 1824.908  | 1824.9165 | +2;+3    | 101.0 | P07724        | Serum albumin                                         |
| TPVSEHVTKCCSGSLVER                                         | 1930.9241 | 1930.9268 | +2;+3;+4 | 126.0 | P07724        | Serum albumin                                         |
| TPVSEHVTKCcSGSLVER +<br>Carbamidomethyl (C)                | 1987.9456 | 1987.9549 | +2;+3;+4 | 137.0 | P07724        | Serum albumin                                         |
| AETFTFHSDICTLPEKEK                                         | 2094.9932 | 2095.01   | +2;+3;+4 | 98.0  | P07724        | Serum albumin                                         |
| RPCFSALTVEDETYVPEFK                                        | 2229.114  | 2229.1218 | +2;+3;+4 | 111.0 | P07724        | Serum albumin                                         |
| TNcDLYEKLGEYGFQNAILVR +<br>Carbamidomethyl (C)             | 2502.2213 | 2502.2508 | +2;+3;+4 | 150.0 | P07724        | Serum albumin                                         |
| YNDLGEQHFKGLVLIAFSQYLQ<br>K                                | 2710.4119 | 2710.4309 | +3;+4    | 69.0  | P07724        | Serum albumin                                         |
| AYSTDVcVPISR                                               | 1309.6336 | 1309.6433 | 2        | 90.0  | Q7TNG8        | Probable D-lactate dehydrogenase,<br>mitochondrial    |
| AYSTDVcVPISR +<br>Carbamidomethyl (C)                      | 1366.6551 | 1366.6632 | 2        | 81.0  | Q7TNG8        | Probable D-lactate dehydrogenase,<br>mitochondrial    |
| ALALGGTCTGEHGIGLGK                                         | 1653.8508 | 1653.861  | +2;+3    | 136.0 | Q7TNG8        | Probable D-lactate dehydrogenase,<br>mitochondrial    |
| ALALGGTcTGEHGIGLGK +<br>Carbamidomethyl (C)                | 1710.8723 | 1710.8908 | +2;+3    | 135.0 | Q7TNG8        | Probable D-lactate dehydrogenase,<br>mitochondrial    |
| ALALGGTCTGEHGIGLGKR                                        | 1809.9519 | 1809.9685 | +2;+3;+4 | 168.0 | Q7TNG8        | Probable D-lactate dehydrogenase,<br>mitochondrial    |
| ALALGGTcTGEHGIGLGKR +<br>Carbamidomethyl (C)               | 1866.9734 | 1866.9984 | +2;+3;+4 | 168.0 | Q7TNG8        | Probable D-lactate dehydrogenase,<br>mitochondrial    |
| CQPPDAVVWPQNVdQVSR                                         | 2036.9738 | 2036.9858 | +2;+3    | 140.0 | Q7TNG8        | Probable D-lactate dehydrogenase,<br>mitochondrial    |
| LNCVPAPTFLFEFHGSQQT LAE<br>QLQR                            | 2939.4964 | 2939.5207 | +3;+4    | 123.0 | Q7TNG8        | Probable D-lactate dehydrogenase,<br>mitochondrial    |
| HSKLNCVPAPTFLFEFHGSQQT<br>LAEQLQR                          | 3291.6823 | 3291.7054 | 4        | 87.0  | Q7TNG8        | Probable D-lactate dehydrogenase,<br>mitochondrial    |
| LHPAPEATVAATCAFPSVQAA<br>VDSTVQILQAAVVAR                   | 3698.9454 | 3698.9722 | +3;+4;+5 | 121.0 | Q7TNG8        | Probable D-lactate dehydrogenase,<br>mitochondrial    |

|                                                                   |           |           |          |       |        |                                                    |
|-------------------------------------------------------------------|-----------|-----------|----------|-------|--------|----------------------------------------------------|
| LHPAPEATVAATcAFPSVQAA<br>VDSTVQILQAAPVAR +<br>Carbamidomethyl (C) | 3755.9669 | 3755.9965 | +3;+4;+5 | 152.0 | Q7TNG8 | Probable D-lactate dehydrogenase,<br>mitochondrial |
| TGELNFVSCMR                                                       | 1255.5689 | 1255.5722 | 2        | 94.0  | Q91V76 | Ester hydrolase C11orf54 homolog                   |
| APLVCLPVFVSK                                                      | 1271.7312 | 1271.7322 | +2;+3    | 86.0  | Q91V76 | Ester hydrolase C11orf54 homolog                   |
| TGELNFVScMR +<br>Carbamidomethyl (C)                              | 1312.5904 | 1312.5981 | +2;+3    | 106.0 | Q91V76 | Ester hydrolase C11orf54 homolog                   |
| APLVcLPVFVSK +<br>Carbamidomethyl (C)                             | 1328.7526 | 1328.7592 | 2        | 85.0  | Q91V76 | Ester hydrolase C11orf54 homolog                   |
| EPFTFPVRGicGQTR +<br>Carbamidomethyl (C)                          | 1763.8777 | 1763.8803 | 3        | 44.0  | Q91V76 | Ester hydrolase C11orf54 homolog                   |
| APLVCLPVFVSKDPGLDLR                                               | 2038.1285 | 2038.1524 | +2;+3    | 126.0 | Q91V76 | Ester hydrolase C11orf54 homolog                   |
| APLVcLPVFVSKDPGLDLR +<br>Carbamidomethyl (C)                      | 2095.15   | 2095.1696 | +2;+3    | 119.0 | Q91V76 | Ester hydrolase C11orf54 homolog                   |
| YHDFGcALLANLFASEGQPGK<br>+ Carbamidomethyl (C)                    | 2294.079  | 2294.0947 | +2;+3    | 119.0 | Q91V76 | Ester hydrolase C11orf54 homolog                   |
| YSQKYHDFGcALLANLFASEG<br>QPGK                                     | 2743.3064 | 2743.3204 | +3;+4    | 97.0  | Q91V76 | Ester hydrolase C11orf54 homolog                   |
| YSQKYHDFGcALLANLFASEGQ<br>PGK + Carbamidomethyl (C)               | 2800.3279 | 2800.3545 | +3;+4    | 118.0 | Q91V76 | Ester hydrolase C11orf54 homolog                   |
| GLTDNFADVQVSVDcPDLTK<br>EPFTFPVR                                  | 3208.5751 | 3208.5868 | 3        | 172.0 | Q91V76 | Ester hydrolase C11orf54 homolog                   |
| GLTDNFADVQVSVDcPDLTK<br>EPFTFPVR +<br>Carbamidomethyl (C)         | 3265.5966 | 3265.615  | +3;+4    | 181.0 | Q91V76 | Ester hydrolase C11orf54 homolog                   |
| HcSLGIK + Carbamidomethyl<br>(C)                                  | 813.4167  | 813.416   | 2        | 58.0  | Q8K0L3 | Acyl-coenzyme A synthetase ACSM2,<br>mitochondrial |
| SHcSLGIK +<br>Carbamidomethyl (C)                                 | 900.4487  | 900.4506  | 2        | 61.0  | Q8K0L3 | Acyl-coenzyme A synthetase ACSM2,<br>mitochondrial |
| MAEHSCHSLGIK                                                      | 1311.6064 | 1311.6077 | +2;+3;+4 | 105.0 | Q8K0L3 | Acyl-coenzyme A synthetase ACSM2,<br>mitochondrial |
| QTANVLSGACGLHR                                                    | 1425.7147 | 1425.731  | +2;+3    | 98.0  | Q8K0L3 | Acyl-coenzyme A synthetase ACSM2,<br>mitochondrial |
| EIYQTETGLICR                                                      | 1481.7184 | 1481.7209 | 2        | 85.0  | Q8K0L3 | Acyl-coenzyme A synthetase ACSM2,<br>mitochondrial |
| QTANVLSGAcGLHR +<br>Carbamidomethyl (C)                           | 1482.7361 | 1482.7503 | +2;+3    | 101.0 | Q8K0L3 | Acyl-coenzyme A synthetase ACSM2,<br>mitochondrial |
| EASTIHQCvetESR                                                    | 1588.7151 | 1588.7189 | +2;+3    | 100.0 | Q8K0L3 | Acyl-coenzyme A synthetase ACSM2,<br>mitochondrial |

|                                                                |           |           |             |       |        |                                                 |
|----------------------------------------------------------------|-----------|-----------|-------------|-------|--------|-------------------------------------------------|
| GIKDPEGYFHFIGR                                                 | 1634.8205 | 1634.8408 | 3           | 82.0  | Q8K0L3 | Acyl-coenzyme A synthetase ACSM2, mitochondrial |
| EASTIHQcVETESR + Carbamidomethyl (C)                           | 1645.7366 | 1645.7521 | +2;+3       | 109.0 | Q8K0L3 | Acyl-coenzyme A synthetase ACSM2, mitochondrial |
| AIVAGDEVAQEVDVAVPDCSFLK                                        | 2346.1413 | 2346.1734 | +2;+3       | 137.0 | Q8K0L3 | Acyl-coenzyme A synthetase ACSM2, mitochondrial |
| MVATGVCR                                                       | 835.4044  | 835.4083  | 2           | 53.0  | P00329 | Alcohol dehydrogenase 1                         |
| MVATGVcR + Carbamidomethyl (C)                                 | 892.4259  | 892.4289  | 2           | 53.0  | P00329 | Alcohol dehydrogenase 1                         |
| HPESNFCSR                                                      | 1075.4505 | 1075.4512 | 2           | 86.0  | P00329 | Alcohol dehydrogenase 1                         |
| HPESNFcSR + Carbamidomethyl (C)                                | 1132.472  | 1132.472  | 2           | 88.0  | P00329 | Alcohol dehydrogenase 1                         |
| ICKHPESNFcSR + Carbamidomethyl (C)                             | 1544.6864 | 1544.6863 | +2;+3;+4    | 84.0  | P00329 | Alcohol dehydrogenase 1                         |
| IcKHPESNFCSR + Carbamidomethyl (C)                             | 1544.6864 | 1544.6875 | +2;+3;+4    | 87.0  | P00329 | Alcohol dehydrogenase 1                         |
| VIPLFSPQCgEcR + Carbamidomethyl (C)                            | 1572.7429 | 1572.7466 | 2           | 88.0  | P00329 | Alcohol dehydrogenase 1                         |
| VIPLFSPQcGECR + Carbamidomethyl (C)                            | 1572.7429 | 1572.7458 | +2;+3       | 80.0  | P00329 | Alcohol dehydrogenase 1                         |
| VIPLFSPQcGECR + 2 Carbamidomethyl (C)                          | 1629.7643 | 1629.7789 | 2           | 89.0  | P00329 | Alcohol dehydrogenase 1                         |
| VcLIGcGFSTGYGSsAVK + 2 Carbamidomethyl (C)                     | 1842.8645 | 1842.8788 | 2           | 113.0 | P00329 | Alcohol dehydrogenase 1                         |
| IDGASPLDKVcLIGCGFSTGYGSsAVK + Carbamidomethyl (C)              | 2682.3033 | 2682.323  | +2;+3       | 130.0 | P00329 | Alcohol dehydrogenase 1                         |
| SDDHVVSGLVTLPLPAVLGHEGAGIVESVGEVTCVKPGDK                       | 4025.0416 | 4025.0959 | +3;+4;+5;+6 | 92.0  | P00329 | Alcohol dehydrogenase 1                         |
| SDDHVVSGLVTLPLPAVLGHEGAGIVESVGEVTCVKPGDK + Carbamidomethyl (C) | 4082.0631 | 4082.0941 | +4;+5       | 85.0  | P00329 | Alcohol dehydrogenase 1                         |
| IPVNCpYR + Carbamidomethyl (C)                                 | 1017.5066 | 1017.5102 | 2           | 66.0  | P24270 | Catalase                                        |
| DAQLFIQKK                                                      | 1089.6182 | 1089.6218 | 2           | 56.0  | P24270 | Catalase                                        |
| LVNADGEAVYCK                                                   | 1280.6071 | 1280.6179 | 2           | 108.0 | P24270 | Catalase                                        |
| LVNADGEAVYcK + Carbamidomethyl (C)                             | 1337.6285 | 1337.641  | 2           | 116.0 | P24270 | Catalase                                        |
| KLVNADGEAVYCK                                                  | 1408.702  | 1408.7076 | +2;+3       | 118.0 | P24270 | Catalase                                        |
| SALEHSVQCAVDVK                                                 | 1484.7293 | 1484.7246 | +2;+3       | 101.0 | P24270 | Catalase                                        |
| SALEHSVQCAVDVKR                                                | 1640.8304 | 1640.8311 | +3;+4       | 104.0 | P24270 | Catalase                                        |
| DGPMcMHDNQGgAPNY + Carbamidomethyl (C)                         | 1762.6498 | 1762.6644 | 2           | 74.0  | P24270 | Catalase                                        |
| HRLGPNYLQIPVNCpYR + Carbamidomethyl (C)                        | 2096.0738 | 2096.103  | +2;+3;+4    | 106.0 | P24270 | Catalase                                        |
| HMNGYGSHTFKLVNADGEAVYCK                                        | 2540.1577 | 2540.1685 | +3;+4       | 108.0 | P24270 | Catalase                                        |
| DGPMcMHDNQGgAPNYYPN SFSAPeQQR + Carbamidomethyl (C)            | 3167.292  | 3167.3248 | +3;+4       | 120.0 | P24270 | Catalase                                        |
| TAQSVGcNVDGR + Carbamidomethyl (C)                             | 1262.5674 | 1262.5695 | 2           | 92.0  | P35979 | 60S ribosomal protein L12                       |
| EILGTAQSVGcNVDGR                                               | 1617.7781 | 1617.7953 | +2;+3       | 132.0 | P35979 | 60S ribosomal protein L12                       |
| EILGTAQSVGcNVDGR + Carbamidomethyl (C)                         | 1674.7995 | 1674.8098 | +2;+3       | 131.0 | P35979 | 60S ribosomal protein L12                       |
| HPHDIIDDINSgAVECPAS                                            | 1988.8898 | 1988.901  | +2;+3       | 112.0 | P35979 | 60S ribosomal protein L12                       |

|                                                                    |           |           |          |       |               |                                                                                                    |
|--------------------------------------------------------------------|-----------|-----------|----------|-------|---------------|----------------------------------------------------------------------------------------------------|
| ELSGTIKEILGTAQSVGCNVDGR                                            | 2346.1849 | 2346.2092 | +2;+3;+4 | 149.0 | P35979        | 60S ribosomal protein L12                                                                          |
| ELSGTIKEILGTAQSVGcNVDGR + Carbamidomethyl (C)                      | 2403.2064 | 2403.2356 | +2;+3;+4 | 146.0 | P35979        | 60S ribosomal protein L12                                                                          |
| cLAPLAK + Carbamidomethyl (C)                                      | 771.4313  | 771.4344  | 2        | 52.0  | P16858,Q64467 | Glyceraldehyde-3-phosphate dehydrogenase,Glyceraldehyde-3-phosphate dehydrogenase, testis-specific |
| TTVHAITATQK                                                        | 1169.6404 | 1169.6425 | +2;+3    | 69.0  | P16858        | Glyceraldehyde-3-phosphate dehydrogenase                                                           |
| AScTTNcLAPLAK + 2 Carbamidomethyl (C)                              | 1473.6956 | 1473.7036 | 2        | 91.0  | P16858,Q64467 | Glyceraldehyde-3-phosphate dehydrogenase,Glyceraldehyde-3-phosphate dehydrogenase, testis-specific |
| VPTPNVSVVLDTCR                                                     | 1498.7814 | 1498.7935 | +2;+3    | 106.0 | P16858,Q64467 | Glyceraldehyde-3-phosphate dehydrogenase,Glyceraldehyde-3-phosphate dehydrogenase, testis-specific |
| VPTPNVSVVLDTCR + Carbamidomethyl (C)                               | 1555.8029 | 1555.8146 | +2;+3    | 126.0 | P16858,Q64467 | Glyceraldehyde-3-phosphate dehydrogenase,Glyceraldehyde-3-phosphate dehydrogenase, testis-specific |
| IVSNAScTTNcLAPLAK + Carbamidomethyl (C)                            | 1761.8753 | 1829.9108 | +2;+3    | 144.0 | P16858,Q64467 | Glyceraldehyde-3-phosphate dehydrogenase,Glyceraldehyde-3-phosphate dehydrogenase, testis-specific |
| IVSNAScTTNcLAPLAK + Carbamidomethyl (C)                            | 1761.8753 | 1761.8893 | +2;+3    | 122.0 | P16858,Q64467 | Glyceraldehyde-3-phosphate dehydrogenase,Glyceraldehyde-3-phosphate dehydrogenase, testis-specific |
| IVSNAScTTNcLAPLAKVIHDNF GIVEGLMTTVHAITATQK + 2 Carbamidomethyl (C) | 4463.2651 | 4463.2909 | +4;+5    | 30.0  | P16858        | Glyceraldehyde-3-phosphate dehydrogenase                                                           |
| TFHETLNCCGSNALTLTTILR                                              | 2509.2305 | 2509.2467 | +2;+3;+4 | 129.0 | P35762        | CD81 antigen                                                                                       |
| TFHETLNcCGSNALTLTTILR + Carbamidomethyl (C)                        | 2566.252  | 2566.2706 | +2;+3;+4 | 150.0 | P35762        | CD81 antigen                                                                                       |
| TFHETLNcCGSNALTLTTILR + Carbamidomethyl (C)                        | 2566.252  | 2566.276  | +2;+3    | 150.0 | P35762        | CD81 antigen                                                                                       |
| CPGSLPK                                                            | 700.3578  | 700.3604  | 2        | 53.0  | O09173        | Homogentisate 1,2-dioxygenase                                                                      |
| cWEPLR + Carbamidomethyl (C)                                       | 859.401   | 859.4093  | 2        | 41.0  | O09173        | Homogentisate 1,2-dioxygenase                                                                      |
| GPDADCFEK                                                          | 980.3909  | 980.3999  | 2        | 46.0  | O09173        | Homogentisate 1,2-dioxygenase                                                                      |

|                                                      |           |           |          |       |        |                                           |
|------------------------------------------------------|-----------|-----------|----------|-------|--------|-------------------------------------------|
| TcScLDENYYK + 2 Carbamidomethyl (C)                  | 1451.5697 | 1519.6133 | 2        | 75.0  | O09173 | Homogentisate 1,2-dioxygenase             |
| TcScLDENYYK + Carbamidomethyl (C)                    | 1462.5744 | 1462.5908 | 2        | 62.0  | O09173 | Homogentisate 1,2-dioxygenase             |
| MSLQPNEICVIQR                                        | 1529.7694 | 1529.775  | +2;+3    | 100.0 | O09173 | Homogentisate 1,2-dioxygenase             |
| YISGFNGECASEDPR                                      | 1643.6886 | 1643.7042 | 2        | 125.0 | O09173 | Homogentisate 1,2-dioxygenase             |
| KVDFVSGLYTLCGAGDIK                                   | 1884.9655 | 1884.9857 | +2;+3    | 166.0 | O09173 | Homogentisate 1,2-dioxygenase             |
| SNNGLAVHIFLcNSSMENR + Carbamidomethyl (C)            | 2161.9997 | 2162.0104 | +2;+3    | 100.0 | O09173 | Homogentisate 1,2-dioxygenase             |
| AAVSCLWGK                                            | 933.4742  | 933.483   | 2        | 83.0  | P02088 | Hemoglobin subunit beta-1                 |
| AAVScLWGK + Carbamidomethyl (C)                      | 990.4957  | 990.5029  | 2        | 74.0  | P02088 | Hemoglobin subunit beta-1                 |
| KVNSDEVGGEALGR                                       | 1429.7161 | 1429.7179 | +2;+3    | 83.0  | P02088 | Hemoglobin subunit beta-1                 |
| VHLTDAEKAAVScLWGK + Carbamidomethyl (C)              | 1883.9564 | 1883.9791 | +2;+3;+4 | 149.0 | P02088 | Hemoglobin subunit beta-1                 |
| AAVSCLWGKVNSEVGGGEALGR                               | 2217.0848 | 2217.1042 | 3        | 138.0 | P02088 | Hemoglobin subunit beta-1                 |
| VITAFNDGLNHLDLTKGTFASLSELHC DK                       | 3144.555  | 3144.5938 | +3;+4;+5 | 53.0  | P02088 | Hemoglobin subunit beta-1                 |
| VITAFNDGLNHLDLTKGTFASLSELHC DK + Carbamidomethyl (C) | 3201.5765 | 3201.6142 | +3;+4;+5 | 116.0 | P02088 | Hemoglobin subunit beta-1                 |
| AENACVPPFTVEVK                                       | 1502.7439 | 1502.7548 | 2        | 94.0  | Q9D964 | Glycine amidinotransferase, mitochondrial |
| FVTTEFEPFDAADFIR                                     | 2006.9084 | 2006.9248 | +2;+3    | 127.0 | Q9D964 | Glycine amidinotransferase, mitochondrial |
| NANSLGGGFHCWTcDVR R + Carbamidomethyl (C)            | 2116.932  | 2116.95   | +2;+3;+4 | 78.0  | Q9D964 | Glycine amidinotransferase, mitochondrial |
| cPVSSYNEWDPLEEVIVGR + Carbamidomethyl (C)            | 2248.047  | 2248.0656 | +2;+3    | 158.0 | Q9D964 | Glycine amidinotransferase, mitochondrial |
| cDVVVIPAGVPR + Carbamidomethyl (C)                   | 1280.6911 | 1280.7024 | +2;+3    | 67.0  | P08249 | Malate dehydrogenase, mitochondrial       |
| EGVVECSFVQSK                                         | 1310.6177 | 1310.622  | 2        | 71.0  | P08249 | Malate dehydrogenase, mitochondrial       |
| TIIP LISQCTPK                                        | 1312.7424 | 1312.7533 | 2        | 91.0  | P08249 | Malate dehydrogenase, mitochondrial       |
| TIIP LISQcTPK + Carbamidomethyl (C)                  | 1369.7639 | 1369.772  | 2        | 82.0  | P08249 | Malate dehydrogenase, mitochondrial       |
| GYLGPEQLPDCLK                                        | 1431.7068 | 1431.7216 | 2        | 106.0 | P08249 | Malate dehydrogenase, mitochondrial       |
| ETECTYFSTPLLLGK                                      | 1700.8331 | 1700.8522 | 2        | 86.0  | P08249 | Malate dehydrogenase, mitochondrial       |
| ETECTYFSTPLLLGKK                                     | 1828.9281 | 1828.9464 | +2;+3    | 89.0  | P08249 | Malate dehydrogenase, mitochondrial       |
| VNVPVIGGHAGKTIIP LISQCTPK                            | 2441.3828 | 2441.3815 | 4        | 50.0  | P08249 | Malate dehydrogenase, mitochondrial       |
| VNVPVIGGHAGKTIIP LISQcTPK + Carbamidomethyl (C)      | 2498.4043 | 2498.4179 | +3;+4    | 88.0  | P08249 | Malate dehydrogenase, mitochondrial       |
| GYLGPEQLPDcLKGCDVVVIPAGVPR + Carbamidomethyl (C)     | 2751.4088 | 2751.4226 | +2;+3    | 100.0 | P08249 | Malate dehydrogenase, mitochondrial       |

|                                                                      |           |           |          |       |        |                                     |
|----------------------------------------------------------------------|-----------|-----------|----------|-------|--------|-------------------------------------|
| TIIP LISQCTPKVDFPQDQLATL<br>TGR                                      | 2854.5263 | 2854.5401 | 3        | 140.0 | P08249 | Malate dehydrogenase, mitochondrial |
| LVILANNCPALR                                                         | 1295.7383 | 1295.7475 | 2        | 105.0 | P62889 | 60S ribosomal protein L30           |
| LVILANNCPALRK                                                        | 1423.8333 | 1423.8355 | +2;+3    | 68.0  | P62889 | 60S ribosomal protein L30           |
| LVILANNcPALRK +<br>Carbamidomethyl (C)                               | 1480.8548 | 1480.8718 | +2;+3    | 78.0  | P62889 | 60S ribosomal protein L30           |
| AKLVILANNCPALR                                                       | 1494.8704 | 1494.8742 | +2;+3    | 96.0  | P62889 | 60S ribosomal protein L30           |
| AKLVILANNcPALR +<br>Carbamidomethyl (C)                              | 1551.8919 | 1551.9061 | +2;+3    | 104.0 | P62889 | 60S ribosomal protein L30           |
| VCTLAIIDPGDSDIIR                                                     | 1699.8815 | 1699.8868 | 2        | 113.0 | P62889 | 60S ribosomal protein L30           |
| VcTLAIIDPGDSDIIR +<br>Carbamidomethyl (C)                            | 1756.9029 | 1756.917  | 2        | 108.0 | P62889 | 60S ribosomal protein L30           |
| TGVHHYSGNIELGTACGK                                                   | 1956.9112 | 1956.9402 | +2;+3;+4 | 121.0 | P62889 | 60S ribosomal protein L30           |
| TGVHHYSGNIELGTAcGK +<br>Carbamidomethyl (C)                          | 2013.9327 | 2013.9576 | +2;+3    | 103.0 | P62889 | 60S ribosomal protein L30           |
| ENFSCLTR                                                             | 968.4386  | 968.4478  | 2        | 55.0  | P14152 | Malate dehydrogenase, cytoplasmic   |
| NPANTNCLTASK                                                         | 1232.5819 | 1232.5825 | 2        | 107.0 | P14152 | Malate dehydrogenase, cytoplasmic   |
| NPANTNcLTASK +<br>Carbamidomethyl (C)                                | 1289.6034 | 1289.6104 | 2        | 112.0 | P14152 | Malate dehydrogenase, cytoplasmic   |
| SAPSIPKENFSCLTR                                                      | 1648.8243 | 1648.8313 | +2;+3    | 87.0  | P14152 | Malate dehydrogenase, cytoplasmic   |
| VIVVGNPANTNCLTASK                                                    | 1699.8927 | 1699.8986 | +2;+3    | 128.0 | P14152 | Malate dehydrogenase, cytoplasmic   |
| SVKVIVVGNPANTNCLTASK                                                 | 2014.0881 | 2014.108  | +2;+3    | 141.0 | P14152 | Malate dehydrogenase, cytoplasmic   |
| CPLRPWK                                                              | 995.5375  | 995.5368  | +2;+3    | 51.0  | Q91Y97 | Fructose-bisphosphate aldolase B    |
| cPLRPWK +<br>Carbamidomethyl (C)                                     | 1052.5589 | 1052.5667 | +2;+3    | 46.0  | Q91Y97 | Fructose-bisphosphate aldolase B    |
| AMANcQAAQQYVH +<br>Carbamidomethyl (C)                               | 1547.6609 | 1547.6631 | 2        | 112.0 | Q91Y97 | Fructose-bisphosphate aldolase B    |
| CPLRPWKLSFSYGR                                                       | 1805.9399 | 1805.9446 | 3        | 58.0  | Q91Y97 | Fructose-bisphosphate aldolase B    |
| cPLRPWKLSFSYGR +<br>Carbamidomethyl (C)                              | 1862.9614 | 1862.9782 | +2;+3;+4 | 81.0  | Q91Y97 | Fructose-bisphosphate aldolase B    |
| IADQCPSLAIQENANALAR                                                  | 2084.032  | 2084.0626 | +2;+3    | 142.0 | Q91Y97 | Fructose-bisphosphate aldolase B    |
| TVPAAVPGIcFLSGGMSEEDAT<br>LNLNAINR +<br>Carbamidomethyl (C)          | 3116.5271 | 3116.5378 | 3        | 57.0  | Q91Y97 | Fructose-bisphosphate aldolase B    |
| YASicQQNGLVPIVEVLPDG<br>DHDLEHcQYVSEK + 2<br>Carbamidomethyl (C)     | 4105.9037 | 4105.9198 | +3;+4    | 98.0  | Q91Y97 | Fructose-bisphosphate aldolase B    |
| TVPAAVPGIcFLSGGMSEEDAT<br>LNLNAINRcPLRPWK + 2<br>Carbamidomethyl (C) | 4219.1017 | 4219.1417 | +3;+4    | 70.0  | Q91Y97 | Fructose-bisphosphate aldolase B    |
| LCAATATILDKPEDR                                                      | 1615.8239 | 1615.8281 | +2;+3    | 135.0 | O35215 | D-dopachrome decarboxylase          |

|                                              |           |           |          |       |        |                                                          |
|----------------------------------------------|-----------|-----------|----------|-------|--------|----------------------------------------------------------|
| STPCALLVSSIGVVGTAEQNR                        | 2367.1853 | 2367.2132 | +2;+3;+4 | 191.0 | O35215 | D-dopachrome decarboxylase                               |
| IPAGLENRLCAATATILDKPEDR                      | 2466.29   | 2466.3091 | +3;+4    | 41.0  | O35215 | D-dopachrome decarboxylase                               |
| SVSTACTTGAHAVGDSFR                           | 1765.8054 | 1765.8171 | 3        | 81.0  | Q9D404 | 3-oxoacyl-[acyl-carrier-protein] synthase, mitochondrial |
| GNHNSVSTACTTGAHAVGDSFR + Carbamidomethyl (C) | 2228.0029 | 2228.0088 | +3;+4    | 100.0 | Q9D404 | 3-oxoacyl-[acyl-carrier-protein] synthase, mitochondrial |
| LKGNHNSVSTACTTGAHAVGDSFR                     | 2412.1605 | 2412.1772 | +2;+3;+4 | 145.0 | Q9D404 | 3-oxoacyl-[acyl-carrier-protein] synthase, mitochondrial |
| SYIPSCR                                      | 824.3851  | 824.3914  | 2        | 42.0  | Q91VA0 | Acyl-coenzyme A synthetase ACSM1, mitochondrial          |
| SASPDHTCIK                                   | 1057.4862 | 1057.4923 | +2;+3    | 76.0  | Q91VA0 | Acyl-coenzyme A synthetase ACSM1, mitochondrial          |
| LVVSDHSHEGWLDFCSLIK                          | 2184.0674 | 2184.0747 | +3;+4    | 85.0  | Q91VA0 | Acyl-coenzyme A synthetase ACSM1, mitochondrial          |
| AIVTTASLVPEVESVASECPDLK                      | 2357.2036 | 2357.2262 | +2;+3    | 119.0 | Q91VA0 | Acyl-coenzyme A synthetase ACSM1, mitochondrial          |
| FPTLEHCTTGESLLPEEYEQWK                       | 2693.2319 | 2693.2462 | 3        | 105.0 | Q91VA0 | Acyl-coenzyme A synthetase ACSM1, mitochondrial          |
| PETCVR                                       | 703.3323  | 703.3351  | 2        | 42.0  | Q9DBM2 | Peroxisomal bifunctional enzyme                          |
| LAPETCVR                                     | 887.4535  | 887.461   | 2        | 86.0  | Q9DBM2 | Peroxisomal bifunctional enzyme                          |
| LAPETcVR + Carbamidomethyl (C)               | 944.4749  | 944.4789  | 2        | 74.0  | Q9DBM2 | Peroxisomal bifunctional enzyme                          |
| cLYSLINEAFR + Carbamidomethyl (C)            | 1384.6809 | 1384.6831 | 2        | 87.0  | Q9DBM2 | Peroxisomal bifunctional enzyme                          |
| cNPPVNAISPTVITEVR + Carbamidomethyl (C)      | 1865.9669 | 1865.9933 | 2        | 134.0 | Q9DBM2 | Peroxisomal bifunctional enzyme                          |
| LcNPPVNAISPTVITEVR + Carbamidomethyl (C)     | 1979.051  | 1979.0706 | +2;+3    | 139.0 | Q9DBM2 | Peroxisomal bifunctional enzyme                          |
| IRLCNPPVNAISPTVITEVR                         | 2191.2147 | 2191.2212 | 3        | 100.0 | Q9DBM2 | Peroxisomal bifunctional enzyme                          |
| IRLcNPPVNAISPTVITEVR + Carbamidomethyl (C)   | 2248.2362 | 2248.248  | 3        | 86.0  | Q9DBM2 | Peroxisomal bifunctional enzyme                          |
| YQKPVVAAIQGVALGGGLELALGCHYR                  | 2782.4952 | 2782.503  | +3;+4    | 126.0 | Q9DBM2 | Peroxisomal bifunctional enzyme                          |
| SCEAGYSPSYKEDK                               | 1562.6559 | 1562.6613 | +2;+3    | 88.0  | P10605 | Cathepsin B                                              |
| ScEAGYSPSYKEDK + Carbamidomethyl (C)         | 1619.6773 | 1619.6849 | +2;+3    | 83.0  | P10605 | Cathepsin B                                              |
| GENHCGIESEIVAGIPR                            | 1779.8574 | 1779.8688 | +2;+3    | 133.0 | P10605 | Cathepsin B                                              |
| ENHcGIESEIVAGIPR + Carbamidomethyl (C)       | 1779.8574 | 1779.8599 | 3        | 64.0  | P10605 | Cathepsin B                                              |



|                                                            |           |           |          |       |        |                                      |
|------------------------------------------------------------|-----------|-----------|----------|-------|--------|--------------------------------------|
| GENHcGIESEIVAGIPR + Carbamidomethyl (C)                    | 1836.8788 | 1836.8997 | +2;+3    | 129.0 | P10605 | Cathepsin B                          |
| ILRGENHCGIESEIVAGIPR                                       | 2162.1266 | 2162.132  | +3;+4    | 93.0  | P10605 | Cathepsin B                          |
| MVCANKEEK                                                  | 1050.4838 | 1050.4832 | +2;+3    | 65.0  | P47791 | Glutathione reductase, mitochondrial |
| GVYAVGDVcGK + Carbamidomethyl (C)                          | 1123.5332 | 1123.5414 | 2        | 71.0  | P47791 | Glutathione reductase, mitochondrial |
| LGGTcVNVGCVPK + Carbamidomethyl (C)                        | 1370.6687 | 1370.672  | 2        | 94.0  | P47791 | Glutathione reductase, mitochondrial |
| NFDSLISNCTEELNAGVEVLK                                      | 2510.1846 | 2510.2121 | +2;+3    | 151.0 | P47791 | Glutathione reductase, mitochondrial |
| NFDSLISNcTEELNAGVEVLK + Carbamidomethyl (C)                | 2567.2061 | 2567.2372 | +2;+3    | 131.0 | P47791 | Glutathione reductase, mitochondrial |
| KPTTTMIPDvDCLLWAIGRDP NSK                                  | 2670.3509 | 2670.3556 | +3;+4    | 133.0 | P47791 | Glutathione reductase, mitochondrial |
| KPTTTMIPDvDcLLWAIGRDP NSK + Carbamidomethyl (C)            | 2727.3724 | 2727.4095 | 3        | 112.0 | P47791 | Glutathione reductase, mitochondrial |
| VLRNFDSLISNcTEELNAGVE VLK + Carbamidomethyl (C)            | 2935.4597 | 2935.4788 | 3        | 66.0  | P47791 | Glutathione reductase, mitochondrial |
| LVQAFQYTDHEGVECPAGWK PGS                                   | 2518.1587 | 2518.1928 | 3        | 82.0  | Q61171 | Peroxiredoxin-2                      |
| LGCEVLGVSVDsQFTHLAWIN TPR                                  | 2641.3323 | 2641.3423 | 3        | 119.0 | Q61171 | Peroxiredoxin-2                      |
| KLGCEVLGVSVDsQFTHLAWI NTPR                                 | 2769.4272 | 2769.4543 | +3;+4    | 170.0 | Q61171 | Peroxiredoxin-2                      |
| LLEACTFHKH                                                 | 1197.5965 | 1197.6074 | +2;+3;+4 | 72.0  | Q92111 | Serotransferrin                      |
| TKCDEWSIISGK                                               | 1494.7024 | 1494.7099 | 2        | 108.0 | Q92111 | Serotransferrin                      |
| KPVDQYEDCYLAR                                              | 1598.7399 | 1598.748  | 2        | 97.0  | Q92111 | Serotransferrin                      |
| cAPNNKEEYNGYTGAFR + Carbamidomethyl (C)                    | 1989.8639 | 1989.8752 | +2;+3    | 109.0 | Q92111 | Serotransferrin                      |
| NQQEGVCPEGSIDNSPVKwCA LSHLER + Carbamidomethyl (C)         | 3052.4131 | 3052.438  | +3;+4    | 71.0  | Q92111 | Serotransferrin                      |
| VPGAFTPGCSK                                                | 1062.5168 | 1062.5145 | 2        | 94.0  | P99029 | Peroxiredoxin-5, mitochondrial       |
| cSLAPNILSQL + Carbamidomethyl (C)                          | 1214.6329 | 1214.639  | 2        | 41.0  | P99029 | Peroxiredoxin-5, mitochondrial       |
| GVLFGVPGAFTPGCSK                                           | 1535.7807 | 1535.7972 | +2;+3    | 84.0  | P99029 | Peroxiredoxin-5, mitochondrial       |
| GVLFGVPGAFTPGcSK + Carbamidomethyl (C)                     | 1592.8021 | 1592.8188 | 2        | 75.0  | P99029 | Peroxiredoxin-5, mitochondrial       |
| KGVLFVPGAFTPGCSK                                           | 1663.8756 | 1663.8915 | +2;+3    | 142.0 | P99029 | Peroxiredoxin-5, mitochondrial       |
| ALNVEPDGTGLTcSLAPNILSQL                                    | 2325.1886 | 2325.2122 | +2;+3    | 76.0  | P99029 | Peroxiredoxin-5, mitochondrial       |
| ALNVEPDGTGLTcSLAPNILSQL + Carbamidomethyl (C)              | 2382.2101 | 2382.2233 | +2;+3    | 37.0  | P99029 | Peroxiredoxin-5, mitochondrial       |
| LYNTCSVFGPDGSLLVK                                          | 1811.9128 | 1811.9292 | 2        | 103.0 | Q9JHW2 | Omega-amidase NIT2                   |
| TLSPGDSFSTFDTPYCK                                          | 1864.819  | 1864.8256 | 2        | 122.0 | Q9JHW2 | Omega-amidase NIT2                   |
| ESSIYLIGGSIPeEDAGKLYNTCS VFGPDGSLLVK                       | 3657.8124 | 3657.8383 | +3;+4    | 118.0 | Q9JHW2 | Omega-amidase NIT2                   |
| ESSIYLIGGSIPeEDAGKLYNTcS VFGPDGSLLVK + Carbamidomethyl (C) | 3714.8338 | 3714.8785 | +3;+4    | 104.0 | Q9JHW2 | Omega-amidase NIT2                   |
| QGANIVSLPECFNSPYGTTYFP DYAEKIPGESTQK                       | 3850.8036 | 3850.8514 | 3        | 70.0  | Q9JHW2 | Omega-amidase NIT2                   |

|                                                                  |           |           |       |       |        |                                                                         |
|------------------------------------------------------------------|-----------|-----------|-------|-------|--------|-------------------------------------------------------------------------|
| QGANIVSLPEcFNSPYGTTFYP<br>DYAEKIPGESTQK +<br>Carbamidomethyl (C) | 3907.8251 | 3907.8535 | 3     | 66.0  | Q9JHW2 | Omega-amidase NIT2                                                      |
| IICQGFTGK                                                        | 965.5004  | 965.5066  | 2     | 89.0  | Q9WUM5 | Succinate--CoA ligase [ADP/GDP-forming]<br>subunit alpha, mitochondrial |
| LIGPNCPGVINPGEcK +<br>Carbamidomethyl (C)                        | 1734.8433 | 1734.8606 | 2     | 114.0 | Q9WUM5 | Succinate--CoA ligase [ADP/GDP-forming]<br>subunit alpha, mitochondrial |
| LIGPNcPGVINPGECK +<br>Carbamidomethyl (C)                        | 1734.8433 | 1734.8617 | 2     | 114.0 | Q9WUM5 | Succinate--CoA ligase [ADP/GDP-forming]<br>subunit alpha, mitochondrial |
| cVYSATK + Carbamidomethyl<br>(C)                                 | 827.3847  | 827.384   | 2     | 50.0  | Q8JZV9 | 3-hydroxybutyrate dehydrogenase type 2                                  |
| GVENRCVYSATK                                                     | 1325.6398 | 1325.642  | +2;+3 | 58.0  | Q8JZV9 | 3-hydroxybutyrate dehydrogenase type 2                                  |
| GVENRcVYSATK +<br>Carbamidomethyl (C)                            | 1382.6612 | 1382.6695 | +2;+3 | 64.0  | Q8JZV9 | 3-hydroxybutyrate dehydrogenase type 2                                  |
| cNCVCPGTVDTPSLQER +<br>Carbamidomethyl (C)                       | 1877.807  | 1877.8279 | 2     | 127.0 | Q8JZV9 | 3-hydroxybutyrate dehydrogenase type 2                                  |
| NcVcPGTVDTPSLQER + 2<br>Carbamidomethyl (C)                      | 1899.8455 | 1899.7949 | +2;+3 | 55.0  | Q8JZV9 | 3-hydroxybutyrate dehydrogenase type 2                                  |
| cNcVCPGTVDTPSLQER + 2<br>Carbamidomethyl (C)                     | 1934.8285 | 1934.8448 | 2     | 122.0 | Q8JZV9 | 3-hydroxybutyrate dehydrogenase type 2                                  |
| cNCVcPGTVDTPSLQER + 2<br>Carbamidomethyl (C)                     | 1934.8285 | 1934.8412 | 2     | 142.0 | Q8JZV9 | 3-hydroxybutyrate dehydrogenase type 2                                  |
| cNcVcPGTVDTPSLQER + 3<br>Carbamidomethyl (C)                     | 1991.85   | 1991.8697 | +2;+3 | 121.0 | Q8JZV9 | 3-hydroxybutyrate dehydrogenase type 2                                  |
| SVSAFAPICNPVLCSWGKK +<br>Carbamidomethyl (C)                     | 2131.0594 | 2131.0797 | 3     | 75.0  | Q9R0P3 | S-formylglutathione hydrolase                                           |
| SVSAFAPICNPVLCSWGKK +<br>Carbamidomethyl (C)                     | 2131.0594 | 2131.0702 | +2;+3 | 88.0  | Q9R0P3 | S-formylglutathione hydrolase                                           |
| GcNIKGEDDSWDFGTGAGFYV<br>NATEDPWK +<br>Carbamidomethyl (C)       | 3235.3829 | 3235.4023 | 3     | 117.0 | Q9R0P3 | S-formylglutathione hydrolase                                           |
| LCGSGFQSIvSGcQEicSK + 2<br>Carbamidomethyl (C)                   | 2194.9697 | 2194.9868 | +2;+3 | 119.0 | Q8BWT1 | 3-ketoacyl-CoA thiolase, mitochondrial                                  |
| LcGSGFQSIvSGcQEicSK + 3<br>Carbamidomethyl (C)                   | 2251.9912 | 2252.0084 | +2;+3 | 113.0 | Q8BWT1 | 3-ketoacyl-CoA thiolase, mitochondrial                                  |
| VGVPTETGALTLNRLCGSGFQS<br>IVSGcQEicSK + 2<br>Carbamidomethyl (C) | 3603.7372 | 3603.7828 | +3;+4 | 74.0  | Q8BWT1 | 3-ketoacyl-CoA thiolase, mitochondrial                                  |
| IAGPLSSCVR                                                       | 1058.5543 | 1058.5597 | 2     | 65.0  | Q80X90 | Filamin-B                                                               |

|                                                     |           |           |          |       |                      |                                                                                                 |
|-----------------------------------------------------|-----------|-----------|----------|-------|----------------------|-------------------------------------------------------------------------------------------------|
| VAVTEGCQPSR                                         | 1145.5499 | 1145.5553 | 2        | 92.0  | Q80X90               | Filamin-B                                                                                       |
| CVYKPVQPGPHVVK                                      | 1549.8439 | 1549.8437 | +2;+3;+4 | 75.0  | Q80X90               | Filamin-B                                                                                       |
| GAGTGGLGLTVEGPCEAK                                  | 1615.7876 | 1615.7901 | 2        | 85.0  | Q80X90,Q8VHX6        | Filamin-B,Filamin-C                                                                             |
| VHSPSGAVEECHVSELEPKYAVR                             | 2637.2493 | 2637.2573 | 4        | 32.0  | Q80X90               | Filamin-B                                                                                       |
| VGEPGILcVDCSEAGPGLGLEAVSDSGAK + Carbamidomethyl (C) | 2955.3842 | 2955.3948 | +2;+3    | 122.0 | Q80X90               | Filamin-B                                                                                       |
| GcNLDSAR + Carbamidomethyl (C)                      | 891.3869  | 891.3918  | 2        | 43.0  | P06151,P16125,P00342 | L-lactate dehydrogenase A chain,L-lactate dehydrogenase B chain,L-lactate dehydrogenase C chain |
| VIGSGCNLDSAR                                        | 1190.5714 | 1190.5732 | 2        | 122.0 | P06151,P16125,P00342 | L-lactate dehydrogenase A chain,L-lactate dehydrogenase B chain,L-lactate dehydrogenase C chain |
| IVSSKDYCVTANSK                                      | 1513.7446 | 1513.751  | +2;+3    | 129.0 | P06151               | L-lactate dehydrogenase A chain                                                                 |
| LLIVSNPVDILTYVAWKISGFPK                             | 2572.4669 | 2572.4873 | 3        | 129.0 | P06151               | L-lactate dehydrogenase A chain                                                                 |
| EVDEYCK                                             | 884.3586  | 884.3639  | 2        | 52.0  | Q64442               | Sorbitol dehydrogenase                                                                          |
| HNADFCYK                                            | 996.4123  | 996.4148  | 2        | 73.0  | Q64442               | Sorbitol dehydrogenase                                                                          |
| cATPPDDGNLcR + 2 Carbamidomethyl (C)                | 1442.5919 | 1442.6011 | 2        | 101.0 | Q64442               | Sorbitol dehydrogenase                                                                          |
| MHSVIGICGSDVHYWEHGR                                 | 2068.8996 | 2068.9015 | +3;+4    | 103.0 | Q64442               | Sorbitol dehydrogenase                                                                          |
| YNLTPTIFFcATPPDDGNLcR + Carbamidomethyl (C)         | 2482.1297 | 2482.1398 | 2        | 125.0 | Q64442               | Sorbitol dehydrogenase                                                                          |
| IGRYNLPTIFFcATPPDDGNLcR + Carbamidomethyl (C)       | 2808.3364 | 2808.3547 | 3        | 103.0 | Q64442               | Sorbitol dehydrogenase                                                                          |
| KITISDCGQL                                          | 1076.5536 | 1076.5556 | 2        | 103.0 | P17742               | Peptidyl-prolyl cis-trans isomerase A                                                           |
| KITISDCGQL + Carbamidomethyl (C)                    | 1133.5751 | 1133.587  | 2        | 89.0  | P17742               | Peptidyl-prolyl cis-trans isomerase A                                                           |
| ANAGPNTNGSQFFICTAK                                  | 1839.8574 | 1839.8697 | 2        | 113.0 | P17742               | Peptidyl-prolyl cis-trans isomerase A                                                           |
| ANAGPNTNGSQFFICTAK + Carbamidomethyl (C)            | 1896.8788 | 1896.9005 | 2        | 118.0 | P17742               | Peptidyl-prolyl cis-trans isomerase A                                                           |
| HTGPGILSMANAGPNTNGSQFFICTAK + Carbamidomethyl (C)   | 2790.3218 | 2790.3373 | 3        | 149.0 | P17742               | Peptidyl-prolyl cis-trans isomerase A                                                           |
| AFQFVETHGEVCPANWTPE                                 | 2160.9575 | 2160.9848 | 2        | 110.0 | P20108               | Thioredoxin-dependent peroxide reductase, mitochondrial                                         |
| AFQFVETHGEVcPANWTPE + Carbamidomethyl (C)           | 2217.979  | 2218.0056 | 2        | 108.0 | P20108               | Thioredoxin-dependent peroxide reductase, mitochondrial                                         |
| AFQFVETHGEVCPANWTPESP TIKPSPTASK                    | 3355.6183 | 3355.6468 | +3;+4    | 92.0  | P20108               | Thioredoxin-dependent peroxide reductase, mitochondrial                                         |

|                                                              |           |           |          |       |                                 |                                                                                            |
|--------------------------------------------------------------|-----------|-----------|----------|-------|---------------------------------|--------------------------------------------------------------------------------------------|
| ANEFHDVNCEVAVSVDSHFS<br>HLAWINTPR                            | 3392.5997 | 3392.6272 | +3;+4;+5 | 125.0 | P20108                          | Thioredoxin-dependent peroxide reductase, mitochondrial                                    |
| AFQFVETHGEVcPANWTPESP<br>TIKPSPTASK +<br>Carbamidomethyl (C) | 3412.6398 | 3412.6738 | +3;+4    | 127.0 | P20108                          | Thioredoxin-dependent peroxide reductase, mitochondrial                                    |
| ANEFHDVNcEAVAVSVDSHFS<br>HLAWINTPR +<br>Carbamidomethyl (C)  | 3449.6211 | 3449.6389 | +3;+4;+5 | 75.0  | P20108                          | Thioredoxin-dependent peroxide reductase, mitochondrial                                    |
| SIQFVDWCPTGFK                                                | 1526.7228 | 1526.7385 | 2        | 94.0  | P68368,P05213                   | Tubulin alpha-4A chain,Tubulin alpha-1B chain                                              |
| TIGGGDSTFTFFCETGAGK                                          | 2009.8677 | 2009.8788 | 2        | 116.0 | P68368                          | Tubulin alpha-4A chain                                                                     |
| AYHEQLSVAEITNACFEPANQ<br>MVK                                 | 2692.2625 | 2692.266  | +2;+3    | 124.0 | P68368,P05214,P<br>68369,P05213 | Tubulin alpha-4A chain,Tubulin alpha-3 chain,Tubulin alpha-1A chain,Tubulin alpha-1B chain |
| SIQFVDWCPTGFKVGINYQPP<br>TVVPGDLAK                           | 3332.6904 | 3332.7196 | 3        | 90.0  | P68368,P05213                   | Tubulin alpha-4A chain,Tubulin alpha-1B chain                                              |
| QAFTDVATGSLGQGLGAACg<br>MAYTGK + Carbamidomethyl<br>(C)      | 2531.1785 | 2531.189  | 3        | 130.0 | P40142                          | Transketolase                                                                              |
| cEAFGWHITVDGHSVEELcK +<br>2 Carbamidomethyl (C)              | 2554.1621 | 2554.1748 | +2;+3;+4 | 132.0 | P40142                          | Transketolase                                                                              |
| cVTEPSAGSDVAAIK +<br>Carbamidomethyl (C)                     | 1503.7239 | 1503.7282 | 2        | 116.0 | P45952                          | Medium-chain specific acyl-CoA dehydrogenase, mitochondrial                                |
| AYCVTEPSAGSDVAAIK                                            | 1680.8029 | 1680.8183 | 2        | 113.0 | P45952                          | Medium-chain specific acyl-CoA dehydrogenase, mitochondrial                                |
| AYcVTEPSAGSDVAAIK +<br>Carbamidomethyl (C)                   | 1737.8243 | 1737.8406 | 2        | 105.0 | P45952                          | Medium-chain specific acyl-CoA dehydrogenase, mitochondrial                                |
| cAYcVTEPSAGSDVAAIK + 2<br>Carbamidomethyl (C)                | 1965.8812 | 1965.9038 | +2;+3    | 127.0 | P45952                          | Medium-chain specific acyl-CoA dehydrogenase, mitochondrial                                |
| cSPDPGLTALLSDHR +<br>Carbamidomethyl (C)                     | 1637.7832 | 1637.7957 | +2;+3    | 124.0 | Q91X72                          | Hemopexin                                                                                  |
| ELGSPPGISLETIDAAFSCPGSS<br>R                                 | 2390.1424 | 2390.1736 | +2;+3    | 133.0 | Q91X72                          | Hemopexin                                                                                  |
| AAVEEGIVLGGGCALLR                                            | 1626.8763 | 1626.8795 | 2        | 79.0  | P63038                          | 60 kDa heat shock protein, mitochondrial                                                   |
| AAVEEGIVLGGGcALLR +<br>Carbamidomethyl (C)                   | 1683.8978 | 1683.907  | +2;+3    | 121.0 | P63038                          | 60 kDa heat shock protein, mitochondrial                                                   |
| cEFQDAYVLLSEKK +<br>Carbamidomethyl (C)                      | 1728.8392 | 1728.854  | +2;+3    | 91.0  | P63038                          | 60 kDa heat shock protein, mitochondrial                                                   |

|                                                    |           |           |          |       |                                    |                                                                                                              |
|----------------------------------------------------|-----------|-----------|----------|-------|------------------------------------|--------------------------------------------------------------------------------------------------------------|
| TAVCDIPPR                                          | 970.4906  | 970.4936  | 2        | 81.0  | Q9D6F9,P68372,P99024,Q9CWF2,Q7TMM9 | Tubulin beta-4A chain,Tubulin beta-4B chain,Tubulin beta-5 chain,Tubulin beta-2B chain,Tubulin beta-2A chain |
| TAVcDIPPR + Carbamidomethyl (C)                    | 1027.5121 | 1027.5144 | 2        | 73.0  | Q9D6F9,P68372,P99024,Q9CWF2,Q7TMM9 | Tubulin beta-4A chain,Tubulin beta-4B chain,Tubulin beta-5 chain,Tubulin beta-2B chain,Tubulin beta-2A chain |
| EIVHLQAGQCcGNQIGAK                                 | 1764.8941 | 1764.9048 | +2;+3    | 113.0 | Q9D6F9,P68372                      | Tubulin beta-4A chain,Tubulin beta-4B chain                                                                  |
| EIVHLQAGQCcGNQIGAK + Carbamidomethyl (C)           | 1821.9156 | 1821.9287 | 3        | 105.0 | Q9D6F9,P68372                      | Tubulin beta-4A chain,Tubulin beta-4B chain                                                                  |
| MREIVHLQAGQCcGNQIGAK                               | 2052.0357 | 2052.0379 | +3;+4    | 92.0  | Q9D6F9,P68372                      | Tubulin beta-4A chain,Tubulin beta-4B chain                                                                  |
| EIVHIQAGQCcGNQIGAK                                 | 1764.8941 | 1764.9048 | +2;+3    | 113.0 | P99024,Q9ERD7,Q9CWF2,Q7TMM9        | Tubulin beta-5 chain,Tubulin beta-3 chain,Tubulin beta-2B chain,Tubulin beta-2A chain                        |
| EIVHIQAGQCcGNQIGAK + Carbamidomethyl (C)           | 1821.9156 | 1821.9287 | 3        | 105.0 | P99024,Q9ERD7,Q9CWF2,Q7TMM9        | Tubulin beta-5 chain,Tubulin beta-3 chain,Tubulin beta-2B chain,Tubulin beta-2A chain                        |
| MREIVHIQAGQCcGNQIGAK                               | 2052.0357 | 2052.0379 | +3;+4    | 92.0  | P99024,Q9ERD7,Q9CWF2,Q7TMM9        | Tubulin beta-5 chain,Tubulin beta-3 chain,Tubulin beta-2B chain,Tubulin beta-2A chain                        |
| VTNRDIICQIAYAR                                     | 1634.8562 | 1634.8666 | +2;+3    | 92.0  | P47962                             | 60S ribosomal protein L5                                                                                     |
| VGLTNYAAAYcTGLLLAR + Carbamidomethyl (C)           | 1926.0033 | 1926.0237 | 2        | 125.0 | P47962                             | 60S ribosomal protein L5                                                                                     |
| VGLTNYAAAYCTGLLLARR                                | 2025.0829 | 2025.0936 | 3        | 114.0 | P47962                             | 60S ribosomal protein L5                                                                                     |
| VGLIGSCTNSSYEDMGR                                  | 1787.7818 | 1787.7889 | 2        | 151.0 | Q99K10                             | Aconitate hydratase, mitochondrial                                                                           |
| VAVPSTIHCDHLIEAQVGGEK                              | 2202.1103 | 2202.1288 | +2;+3;+4 | 104.0 | Q99K10                             | Aconitate hydratase, mitochondrial                                                                           |
| VAVPSTIHCDHLIEAQVGGEKDLR                           | 2586.3224 | 2586.3501 | +3;+4    | 74.0  | Q99K10                             | Aconitate hydratase, mitochondrial                                                                           |
| cVIKHPNGTQETILLNHTFNETQIEWFR + Carbamidomethyl (C) | 3424.6986 | 3424.7218 | +3;+4;+5 | 109.0 | Q99K10                             | Aconitate hydratase, mitochondrial                                                                           |

|                                            |           |           |          |       |        |                                                                   |
|--------------------------------------------|-----------|-----------|----------|-------|--------|-------------------------------------------------------------------|
| ITQLSAPHCK                                 | 1096.5699 | 1096.5764 | +2;+3    | 74.0  | Q8BH00 | Aldehyde dehydrogenase family 8 member A1                         |
| NPAIIFEDANLEECIPATVR                       | 2214.099  | 2214.1204 | 2        | 150.0 | Q8BH00 | Aldehyde dehydrogenase family 8 member A1                         |
| FLPcNSYIDSYPSTGEVYCK + Carbamidomethyl (C) | 2525.0767 | 2525.0884 | 2        | 116.0 | Q8BH00 | Aldehyde dehydrogenase family 8 member A1                         |
| LSLELGGKNPAIIFEDANLEECIPATVR               | 3011.5637 | 3011.5945 | 3        | 114.0 | Q8BH00 | Aldehyde dehydrogenase family 8 member A1                         |
| GVNTDSGSVCR                                | 1093.4822 | 1093.4806 | 2        | 82.0  | Q11136 | Xaa-Pro dipeptidase                                               |
| GVNTDSGSVcR + Carbamidomethyl (C)          | 1150.5037 | 1150.5037 | 2        | 77.0  | Q11136 | Xaa-Pro dipeptidase                                               |
| FNVNNTILHPEIVECR                           | 1896.9516 | 1896.9667 | +2;+3    | 128.0 | Q11136 | Xaa-Pro dipeptidase                                               |
| FNVNNTILHPEIVEcR + Carbamidomethyl (C)     | 1953.9731 | 1953.9992 | +2;+3    | 123.0 | Q11136 | Xaa-Pro dipeptidase                                               |
| LFCVGFTK                                   | 913.4732  | 913.4786  | 2        | 72.0  | P97351 | 40S ribosomal protein S3a                                         |
| LFCVGFTKK + Carbamidomethyl (C)            | 1098.5896 | 1098.5964 | 3        | 51.0  | P97351 | 40S ribosomal protein S3a                                         |
| ACQSIYPLHDVFVR                             | 1646.8239 | 1646.8304 | +2;+3    | 84.0  | P97351 | 40S ribosomal protein S3a                                         |
| AcQSIYPLHDVFVR + Carbamidomethyl (C)       | 1703.8454 | 1703.8505 | +2;+3    | 104.0 | P97351 | 40S ribosomal protein S3a                                         |
| AcQSIYPLHDVFRK + Carbamidomethyl (C)       | 1831.9403 | 1831.9562 | +2;+3;+4 | 86.0  | P97351 | 40S ribosomal protein S3a                                         |
| AIVLDPCR                                   | 885.4742  | 885.4793  | 2        | 64.0  | A2ARV4 | Low-density lipoprotein receptor-related protein 2                |
| STAFtCANGR + Carbamidomethyl (C)           | 1083.4767 | 1083.484  | 2        | 67.0  | A2ARV4 | Low-density lipoprotein receptor-related protein 2                |
| cADGSSCINSR + Carbamidomethyl (C)          | 1168.4601 | 1168.4616 | 2        | 87.0  | A2ARV4 | Low-density lipoprotein receptor-related protein 2                |
| cQTTNICVPR + Carbamidomethyl (C)           | 1190.5536 | 1190.5528 | 2        | 71.0  | A2ARV4 | Low-density lipoprotein receptor-related protein 2                |
| LQNVECLSFWDWISR                            | 1708.8243 | 1708.8347 | +2;+3    | 105.0 | A2ARV4 | Low-density lipoprotein receptor-related protein 2                |
| cAADGSPPLLLPENVR + Carbamidomethyl (C)     | 1820.9454 | 1820.9531 | +2;+3    | 140.0 | A2ARV4 | Low-density lipoprotein receptor-related protein 2                |
| NVLHADVDVANGFIYWCDFSSVR                    | 2713.2595 | 2713.2577 | 3        | 61.0  | A2ARV4 | Low-density lipoprotein receptor-related protein 2                |
| HVAFLK                                     | 713.4224  | 713.426   | 2        | 41.0  | Q91XE4 | N-acyl-aromatic-L-amino acid amidohydrolase (carboxylate-forming) |

|                                                                |           |           |          |       |        |                                                                      |
|----------------------------------------------------------------|-----------|-----------|----------|-------|--------|----------------------------------------------------------------------|
| QNPGMPCR                                                       | 901.3898  | 901.3958  | 2        | 38.0  | Q91XE4 | N-acyl-aromatic-L-amino acid amidohydrolase (carboxylate-forming)    |
| NGICLEMGPPQGVLR                                                | 1710.8545 | 1710.8597 | 2        | 104.0 | Q91XE4 | N-acyl-aromatic-L-amino acid amidohydrolase (carboxylate-forming)    |
| SCTLTFLGSTATPDDPYEVK                                           | 2143.9984 | 2144.0152 | 2        | 112.0 | Q91XE4 | N-acyl-aromatic-L-amino acid amidohydrolase (carboxylate-forming)    |
| RSCTLTFLGSTATPDDPYEVK                                          | 2300.0995 | 2300.1011 | 3        | 48.0  | Q91XE4 | N-acyl-aromatic-L-amino acid amidohydrolase (carboxylate-forming)    |
| SCTLTFLGSTATPDDPYEVKR                                          | 2300.0995 | 2300.11   | +2;+3    | 119.0 | Q91XE4 | N-acyl-aromatic-L-amino acid amidohydrolase (carboxylate-forming)    |
| YWLQNPGEIQRPSFSAMPVL<br>ANPAATAAccR +<br>Carbamidomethyl (C)   | 3486.6635 | 3486.6898 | +3;+4    | 87.0  | Q91XE4 | N-acyl-aromatic-L-amino acid amidohydrolase (carboxylate-forming)    |
| YWLQNPGEIQRPSFSAMPVL<br>ANPAATAAccR + 2<br>Carbamidomethyl (C) | 3543.685  | 3543.7081 | 3        | 88.0  | Q91XE4 | N-acyl-aromatic-L-amino acid amidohydrolase (carboxylate-forming)    |
| cHYPEDEIGHEDEAESDIFSIK +<br>Carbamidomethyl (C)                | 2619.1071 | 2619.1217 | +3;+4    | 82.0  | O35658 | Complement component 1 Q subcomponent-binding protein, mitochondrial |
| TLVLDCHYPEDEIGHEDEAESD<br>IFSIK                                | 3103.3968 | 3103.4119 | +2;+3;+4 | 107.0 | O35658 | Complement component 1 Q subcomponent-binding protein, mitochondrial |
| KTLVLDCHYPEDEIGHEDEAES<br>DIFSIK                               | 3231.4918 | 3231.5116 | +3;+4    | 79.0  | O35658 | Complement component 1 Q subcomponent-binding protein, mitochondrial |
| KTLVLDCHYPEDEIGHEDEAES<br>DIFSIK + Carbamidomethyl<br>(C)      | 3288.5132 | 3288.5674 | +3;+4    | 71.0  | O35658 | Complement component 1 Q subcomponent-binding protein, mitochondrial |
| cPGHADYVK +<br>Carbamidomethyl (C)                             | 1045.4651 | 1045.4672 | +2;+3    | 66.0  | Q8BFR5 | Elongation factor Tu, mitochondrial                                  |
| GDECELLGHNK +<br>Carbamidomethyl (C)                           | 1270.5612 | 1270.5656 | +2;+3    | 55.0  | Q8BFR5 | Elongation factor Tu, mitochondrial                                  |
| KGDECELLGHNK                                                   | 1341.6347 | 1341.6324 | +2;+3    | 110.0 | Q8BFR5 | Elongation factor Tu, mitochondrial                                  |
| HTDcPGHADYVK +<br>Carbamidomethyl (C)                          | 1398.5987 | 1398.5973 | 3        | 39.0  | Q8BFR5 | Elongation factor Tu, mitochondrial                                  |
| HYAHTDCPGHADYVK                                                | 1712.7365 | 1712.7449 | +2;+3;+4 | 87.0  | Q8BFR5 | Elongation factor Tu, mitochondrial                                  |
| TVcIEK + Carbamidomethyl<br>(C)                                | 748.3789  | 748.3784  | 2        | 44.0  | O08749 | Dihydropolyl dehydrogenase, mitochondrial                            |

|                                                         |           |           |          |       |        |                                                |
|---------------------------------------------------------|-----------|-----------|----------|-------|--------|------------------------------------------------|
| VcHAHPTLSEAFR + Carbamidomethyl (C)                     | 1523.7303 | 1523.7402 | +2;+3;+4 | 84.0  | O08749 | Dihydrolipoyl dehydrogenase, mitochondrial     |
| NETLGGTcLNVGCIIPSK + Carbamidomethyl (C)                | 1829.8652 | 1761.8519 | 2        | 140.0 | O08749 | Dihydrolipoyl dehydrogenase, mitochondrial     |
| NETLGGTcLNVGCIIPSK + 2 Carbamidomethyl (C)              | 1886.8866 | 1818.878  | 2        | 122.0 | O08749 | Dihydrolipoyl dehydrogenase, mitochondrial     |
| TVcIEKNETLGGTcLNVGCIIPSK + 2 Carbamidomethyl (C)        | 2628.2598 | 2628.2821 | 3        | 104.0 | O08749 | Dihydrolipoyl dehydrogenase, mitochondrial     |
| VLGAHILGPGAGEMVNEAALALEYGAScEDIAR + Carbamidomethyl (C) | 3353.6384 | 3353.6665 | +3;+4    | 173.0 | O08749 | Dihydrolipoyl dehydrogenase, mitochondrial     |
| IHMGNCAENTAK                                            | 1287.57   | 1287.5714 | +2;+3    | 87.0  | Q8QZT1 | Acetyl-CoA acetyltransferase, mitochondrial    |
| IHMGNcAENTAK + Carbamidomethyl (C)                      | 1344.5914 | 1344.6007 | +2;+3    | 88.0  | Q8QZT1 | Acetyl-CoA acetyltransferase, mitochondrial    |
| AGLPiSTPcTTVnK + Carbamidomethyl (C)                    | 1457.7548 | 1457.7723 | 2        | 79.0  | Q8QZT1 | Acetyl-CoA acetyltransferase, mitochondrial    |
| QATLGAGLPiSTPCTTVnK                                     | 1870.9823 | 1870.9996 | +2;+3    | 102.0 | Q8QZT1 | Acetyl-CoA acetyltransferase, mitochondrial    |
| VTVAGLAGKD                                              | 929.5182  | 929.5039  | 2        | 56.0  | Q99LX0 | Protein deglycase DJ-1                         |
| LAHEVGFgCK                                              | 1059.5172 | 1059.5203 | 3        | 54.0  | Q99LX0 | Protein deglycase DJ-1                         |
| DVMiCpDTSLEDAK + Carbamidomethyl (C)                    | 1592.7062 | 1592.7149 | +2;+3    | 96.0  | Q99LX0 | Protein deglycase DJ-1                         |
| VTVAGLAGKDPVQcSR                                        | 1599.8403 | 1599.851  | +2;+3    | 147.0 | Q99LX0 | Protein deglycase DJ-1                         |
| VTVAGLAGKDPVQcSR + Carbamidomethyl (C)                  | 1656.8618 | 1656.8754 | +2;+3    | 143.0 | Q99LX0 | Protein deglycase DJ-1                         |
| NCVILPHIGSATYK                                          | 1514.7915 | 1514.7921 | +2;+3    | 62.0  | Q91Z53 | Glyoxylate reductase/hydroxypyruvate reductase |
| DLEQGVVGAHLLCR                                          | 1565.7984 | 1565.7991 | +2;+3    | 79.0  | Q91Z53 | Glyoxylate reductase/hydroxypyruvate reductase |
| AALAAQADCEVEQWNSDDPIPR                                  | 2398.0859 | 2398.1008 | +2;+3    | 151.0 | Q91Z53 | Glyoxylate reductase/hydroxypyruvate reductase |
| AQcVIASR + Carbamidomethyl (C)                          | 903.4596  | 903.4591  | 2        | 44.0  | Q9CQ62 | 2,4-dienoyl-CoA reductase, mitochondrial       |
| EMIDRIPCGR                                              | 1188.5743 | 1188.5786 | +2;+3    | 45.0  | Q9CQ62 | 2,4-dienoyl-CoA reductase, mitochondrial       |
| AMTTFLSTLGAQCVIASR                                      | 1868.9488 | 1868.9571 | +2;+3    | 148.0 | Q9CQ62 | 2,4-dienoyl-CoA reductase, mitochondrial       |
| AMTTFLSTLGAQCVIASR + Carbamidomethyl (C)                | 1925.9703 | 1925.9828 | +2;+3    | 146.0 | Q9CQ62 | 2,4-dienoyl-CoA reductase, mitochondrial       |
| TDFQGGCAK                                               | 996.4335  | 996.4355  | 2        | 64.0  | Q9DCM0 | Persulfide dioxygenase ETHE1, mitochondrial    |
| LTLSCFEFIK                                              | 1181.6002 | 1181.6058 | 2        | 65.0  | Q9DCM0 | Persulfide dioxygenase ETHE1, mitochondrial    |



|                                                     |           |           |             |       |               |                                                                   |
|-----------------------------------------------------|-----------|-----------|-------------|-------|---------------|-------------------------------------------------------------------|
| LTLScEEFIK + Carbamidomethyl (C)                    | 1238.6217 | 1238.629  | 2           | 66.0  | Q9DCM0        | Persulfide dioxygenase ETHE1, mitochondrial                       |
| SLLPGCQSVISR                                        | 1258.6703 | 1258.6795 | 2           | 95.0  | Q9DCM0        | Persulfide dioxygenase ETHE1, mitochondrial                       |
| SCTYTYLLGDR                                         | 1290.5914 | 1290.5914 | 2           | 83.0  | Q9DCM0        | Persulfide dioxygenase ETHE1, mitochondrial                       |
| SLLPGcQSVISR + Carbamidomethyl (C)                  | 1315.6918 | 1315.6951 | 2           | 105.0 | Q9DCM0        | Persulfide dioxygenase ETHE1, mitochondrial                       |
| ScTYTYLLGDR + Carbamidomethyl (C)                   | 1347.6129 | 1347.6157 | 2           | 67.0  | Q9DCM0        | Persulfide dioxygenase ETHE1, mitochondrial                       |
| IFTLPGNcLIYPAHDYHGLTVST VEEER + Carbamidomethyl (C) | 3230.5706 | 3230.5852 | +3;+4       | 89.0  | Q9DCM0        | Persulfide dioxygenase ETHE1, mitochondrial                       |
| IGKPHTVPCK                                          | 1078.5957 | 1078.6005 | +2;+3       | 93.0  | P25444        | 40S ribosomal protein S2                                          |
| IGKPHTVPcK + Carbamidomethyl (C)                    | 1135.6172 | 1135.6172 | +2;+3       | 79.0  | P25444        | 40S ribosomal protein S2                                          |
| GYWGNKIGKPHTVPCK                                    | 1783.9192 | 1783.9268 | +2;+3;+4;+5 | 85.0  | P25444        | 40S ribosomal protein S2                                          |
| GYWGNKIGKPHTVPcK + Carbamidomethyl (C)              | 1840.9407 | 1840.9492 | +2;+3;+4;+5 | 73.0  | P25444        | 40S ribosomal protein S2                                          |
| ALANSLACQ GK                                        | 1074.5491 | 1074.5505 | 2           | 92.0  | P05064        | Fructose-bisphosphate aldolase A                                  |
| ALANSLAcQ GK + Carbamidomethyl (C)                  | 1131.5706 | 1131.5792 | 2           | 97.0  | P05064        | Fructose-bisphosphate aldolase A                                  |
| cPLLKPWALTSYGR + Carbamidomethyl (C)                | 1807.9443 | 1807.9564 | 3           | 81.0  | P05064        | Fructose-bisphosphate aldolase A                                  |
| YASICQQNGVIVEPEILPDGD HDLK                          | 2962.4746 | 2962.5059 | 3           | 131.0 | P05064,P05063 | Fructose-bisphosphate aldolase A,Fructose-bisphosphate aldolase C |
| YASICQQNGVIVEPEILPDGD HDLKR                         | 3118.5757 | 3118.6006 | +3;+4       | 133.0 | P05064,P05063 | Fructose-bisphosphate aldolase A,Fructose-bisphosphate aldolase C |
| LFECNQ TGR                                          | 1153.5186 | 1153.5256 | 2           | 76.0  | Q62468        | Villin-1                                                          |
| HVETNSCDVQR                                         | 1286.5674 | 1286.5704 | +2;+3       | 94.0  | Q62468        | Villin-1                                                          |
| TPSCcYLWcGK + 2 Carbamidomethyl (C)                 | 1509.6091 | 1509.6107 | 2           | 77.0  | Q62468        | Villin-1                                                          |
| cPDIAIQLAGTK + Carbamidomethyl (C)                  | 1285.67   | 1285.6812 | 2           | 112.0 | P51855        | Glutathione synthetase                                            |
| CPDIAIQLAGTKK                                       | 1356.7435 | 1356.7455 | +2;+3       | 94.0  | P51855        | Glutathione synthetase                                            |
| AAKcPDIAIQLAGTK + Carbamidomethyl (C)               | 1555.8392 | 1555.8538 | 3           | 75.0  | P51855        | Glutathione synthetase                                            |
| YVDIAIPCNNK                                         | 1248.6172 | 1248.6206 | 2           | 66.0  | P14206        | 40S ribosomal protein SA                                          |
| ADHQPLTEASYVNLPTIALCNT DSPLR                        | 2938.4494 | 2938.48   | +2;+3       | 138.0 | P14206        | 40S ribosomal protein SA                                          |

|                                                          |           |           |       |       |        |                                                              |
|----------------------------------------------------------|-----------|-----------|-------|-------|--------|--------------------------------------------------------------|
| ADHQPLTEASYVNLPTIALcNT<br>DSPLR + Carbamidomethyl<br>(C) | 2995.4709 | 2995.5074 | +2;+3 | 133.0 | P14206 | 40S ribosomal protein S8                                     |
| NcIVLIDSTPYRQWYESHYALPL<br>GR + Carbamidomethyl (C)      | 3050.5072 | 3050.5522 | +3;+4 | 61.0  | P62242 | 40S ribosomal protein S8                                     |
| ISSLLEEQFQGGKLLAcIASRPG<br>QCGR + Carbamidomethyl<br>(C) | 3056.5535 | 3056.5812 | 4     | 52.0  | P62242 | 40S ribosomal protein S8                                     |
| ISSLLEEQFQGGKLLAcIASRPG<br>QcGR + Carbamidomethyl (C)    | 3056.5535 | 3056.5744 | +3;+4 | 132.0 | P62242 | 40S ribosomal protein S8                                     |
| DHENCISGEDITHNGIVYTPK                                    | 2341.0645 | 2341.0817 | 3     | 90.0  | Q61838 | Pregnancy zone protein                                       |
| VKAAPLSLcALTAVDQSVLLK<br>PEAK                            | 2677.5452 | 2677.5689 | +3;+4 | 143.0 | Q61838 | Pregnancy zone protein                                       |
| YASDSHTcVDTK +<br>Carbamidomethyl (C)                    | 1382.5773 | 1382.5843 | +2;+3 | 85.0  | Q3UNX5 | Acyl-coenzyme A synthetase ACSM3,<br>mitochondrial           |
| cIITDDTLAPAVDAVAAK +<br>Carbamidomethyl (C)              | 1842.9397 | 1842.9566 | +2;+3 | 134.0 | Q3UNX5 | Acyl-coenzyme A synthetase ACSM3,<br>mitochondrial           |
| HCVSAGEPINPEVMEQWR                                       | 2080.9459 | 2080.959  | +2;+3 | 149.0 | Q3UNX5 | Acyl-coenzyme A synthetase ACSM3,<br>mitochondrial           |
| HcVSAGEPINPEVMEQWR +<br>Carbamidomethyl (C)              | 2137.9673 | 2137.9796 | +2;+3 | 146.0 | Q3UNX5 | Acyl-coenzyme A synthetase ACSM3,<br>mitochondrial           |
| KTGLDIYEGYQTETVLICGNF<br>K                               | 2548.2519 | 2548.3084 | 3     | 48.0  | Q3UNX5 | Acyl-coenzyme A synthetase ACSM3,<br>mitochondrial           |
| AFVDSCLQLHETK                                            | 1489.7235 | 1489.7313 | +2;+3 | 89.0  | P51174 | Long-chain specific acyl-CoA<br>dehydrogenase, mitochondrial |
| AFVDSCLQLHETK +<br>Carbamidomethyl (C)                   | 1546.745  | 1546.7519 | +2;+3 | 84.0  | P51174 | Long-chain specific acyl-CoA<br>dehydrogenase, mitochondrial |
| AFVDSCLQLHETKR                                           | 1645.8246 | 1645.8268 | +3;+4 | 98.0  | P51174 | Long-chain specific acyl-CoA<br>dehydrogenase, mitochondrial |
| cIGAIAMTEPGAGSDLQGVV +<br>Carbamidomethyl (C)            | 2001.9612 | 2001.975  | +2;+3 | 186.0 | P51174 | Long-chain specific acyl-CoA<br>dehydrogenase, mitochondrial |
| cNEPAVWSQLAK +<br>Carbamidomethyl (C)                    | 1401.6711 | 1401.681  | 2     | 70.0  | Q68FD5 | Clathrin heavy chain 1                                       |
| HSSLAGCQIINYR                                            | 1460.7194 | 1460.7341 | +2;+3 | 123.0 | Q68FD5 | Clathrin heavy chain 1                                       |
| RDPHLAcVAYER +<br>Carbamidomethyl (C)                    | 1485.7147 | 1485.7281 | +2;+3 | 66.0  | Q68FD5 | Clathrin heavy chain 1                                       |
| IHEGCEEPATHNALAK                                         | 1718.8046 | 1718.8119 | +3;+4 | 77.0  | Q68FD5 | Clathrin heavy chain 1                                       |
| IHEGcEEPETHNALAK +<br>Carbamidomethyl (C)                | 1775.826  | 1775.8323 | +3;+4 | 84.0  | Q68FD5 | Clathrin heavy chain 1                                       |
| ANVPNKVIQcFAETGQVQK +<br>Carbamidomethyl (C)             | 2130.0892 | 2130.1037 | 3     | 97.0  | Q68FD5 | Clathrin heavy chain 1                                       |

|                                                   |           |           |       |       |                      |                                                                        |
|---------------------------------------------------|-----------|-----------|-------|-------|----------------------|------------------------------------------------------------------------|
| FcLNPK + Carbamidomethyl (C)                      | 777.3843  | 777.385   | 2     | 35.0  | P28474,O35516        | Alcohol dehydrogenase class-3,Neurogenic locus notch homolog protein 2 |
| EFGASECISQDFSK                                    | 1643.7137 | 1643.7169 | 2     | 93.0  | P28474               | Alcohol dehydrogenase class-3                                          |
| EFGASEcISPQDFSK + Carbamidomethyl (C)             | 1700.7352 | 1700.7523 | 2     | 106.0 | P28474               | Alcohol dehydrogenase class-3                                          |
| AKEFGASECISQDFSK                                  | 1842.8458 | 1842.8508 | 3     | 95.0  | P28474               | Alcohol dehydrogenase class-3                                          |
| AKEFGASEcISPQDFSK + Carbamidomethyl (C)           | 1899.8673 | 1899.8912 | +2;+3 | 140.0 | P28474               | Alcohol dehydrogenase class-3                                          |
| AGDVIPLYIPQcGEcK + Carbamidomethyl (C)            | 1930.9169 | 1930.9347 | 2     | 59.0  | P28474               | Alcohol dehydrogenase class-3                                          |
| AGDVIPLYIPQcGEcK + 2 Carbamidomethyl (C)          | 1987.9383 | 1987.9623 | 2     | 79.0  | P28474               | Alcohol dehydrogenase class-3                                          |
| LKAGDVIPLYIPQcGEcK + Carbamidomethyl (C)          | 2172.0959 | 2172.1127 | 3     | 57.0  | P28474               | Alcohol dehydrogenase class-3                                          |
| TGAPcR + Carbamidomethyl (C)                      | 728.3276  | 728.3299  | 2     | 36.0  | P17182,P21550        | Alpha-enolase,Beta-enolase                                             |
| SCNcLLLK + Carbamidomethyl (C)                    | 1017.4987 | 1017.4991 | 2     | 60.0  | P17182               | Alpha-enolase                                                          |
| ScNcLLLK + Carbamidomethyl (C)                    | 1017.4987 | 1017.5051 | 2     | 46.0  | P17182               | Alpha-enolase                                                          |
| FGANAILGVSLAVCK                                   | 1461.8014 | 1461.8262 | 2     | 74.0  | P17182,P21550,P17183 | Alpha-enolase,Beta-enolase,Gamma-enolase                               |
| VNQIGSVTESLQACK                                   | 1575.7926 | 1575.8042 | 2     | 99.0  | P17182               | Alpha-enolase                                                          |
| VNQIGSVTESLQAcK + Carbamidomethyl (C)             | 1632.8141 | 1632.8245 | 2     | 97.0  | P17182               | Alpha-enolase                                                          |
| SGETEDTFIADLVVGLCTGQIK                            | 2295.1304 | 2295.1422 | +2;+3 | 67.0  | P17182,P21550,P17183 | Alpha-enolase,Beta-enolase,Gamma-enolase                               |
| YTVQDESHSEWVSCVR                                  | 1923.8421 | 1923.8519 | +2;+3 | 134.0 | P68040               | Receptor of activated protein C kinase 1                               |
| YTVQDESHSEWVScvR + Carbamidomethyl (C)            | 1980.8636 | 1980.8912 | +2;+3 | 125.0 | P68040               | Receptor of activated protein C kinase 1                               |
| TNHIGHTGYLNTVTVSPDGSLcASGGK + Carbamidomethyl (C) | 2742.3032 | 2742.3171 | +3;+4 | 89.0  | P68040               | Receptor of activated protein C kinase 1                               |
| VVVVGCR                                           | 730.416   | 730.4166  | 2     | 49.0  | P47199               | Quinone oxidoreductase                                                 |
| GASGGVGLATCQIAR                                   | 1359.6929 | 1359.7029 | 2     | 109.0 | P47199               | Quinone oxidoreductase                                                 |
| VHACGVNPVETIIR                                    | 1556.7769 | 1556.7817 | +2;+3 | 63.0  | P47199               | Quinone oxidoreductase                                                 |
| AGESVLVHGASGGVGLATCQIAR                           | 2152.1059 | 2152.118  | +2;+3 | 168.0 | P47199               | Quinone oxidoreductase                                                 |
| FCLDNGAK                                          | 866.3956  | 866.3942  | 2     | 70.0  | P09411               | Phosphoglycerate kinase 1                                              |
| FcLDNGAK + Carbamidomethyl (C)                    | 923.4171  | 923.4257  | 2     | 57.0  | P09411               | Phosphoglycerate kinase 1                                              |
| GcITIIIGGGDTATcCAK + 2 Carbamidomethyl (C)        | 1832.8107 | 1832.8195 | 2     | 105.0 | P09411               | Phosphoglycerate kinase 1                                              |

|                                                             |           |           |          |       |               |                                                                             |
|-------------------------------------------------------------|-----------|-----------|----------|-------|---------------|-----------------------------------------------------------------------------|
| TGQATVASGIPAGWMGLDcG<br>TESSK + Carbamidomethyl<br>(C)      | 2608.2262 | 2608.2463 | +3;+4    | 118.0 | P09411        | Phosphoglycerate kinase 1                                                   |
| DcVGPEVENACANPAAGTVILL<br>ENLR + Carbamidomethyl (C)        | 2792.3473 | 2792.3856 | +2;+3    | 152.0 | P09411        | Phosphoglycerate kinase 1                                                   |
| DcVGPEVENAcANPAAGTVILL<br>ENLR + 2 Carbamidomethyl<br>(C)   | 2849.3688 | 2849.417  | +2;+3    | 126.0 | P09411        | Phosphoglycerate kinase 1                                                   |
| MVNSVEGCADDALAGLVASN<br>PDLQLLQGHR                          | 3092.5019 | 3092.5405 | +3;+4    | 166.0 | Q8VC30        | Triokinase/FMN cyclase                                                      |
| MVNSVEGCADDALAGLVASN<br>PDLQLLQGHR +<br>Carbamidomethyl (C) | 3149.5234 | 3149.5639 | 3        | 205.0 | Q8VC30        | Triokinase/FMN cyclase                                                      |
| LGILGLCNTLAIIEGRK                                           | 1669.9549 | 1669.9593 | 3        | 97.0  | P51660        | Peroxisomal multifunctional enzyme type<br>2                                |
| KNNIHCNTIAPNAGSR                                            | 1708.8427 | 1708.8605 | +2;+3;+4 | 103.0 | P51660        | Peroxisomal multifunctional enzyme type<br>2                                |
| IcDFSNASKPQTIQUESTGGIVEV<br>LHK + Carbamidomethyl (C)       | 2857.428  | 2857.445  | 4        | 93.0  | P51660        | Peroxisomal multifunctional enzyme type<br>2                                |
| TDDYLDQPccETINR + 2<br>Carbamidomethyl (C)                  | 1966.8037 | 1966.8392 | 2        | 86.0  | Q61598        | Rab GDP dissociation inhibitor beta                                         |
| NTNDANSCQIIPQNVNR                                           | 2141.0283 | 2141.0442 | +2;+3    | 171.0 | Q61598,P50396 | Rab GDP dissociation inhibitor beta,Rab<br>GDP dissociation inhibitor alpha |
| NTNDANSCQIIPQNVNRK                                          | 2269.1233 | 2269.1466 | 3        | 94.0  | Q61598,P50396 | Rab GDP dissociation inhibitor beta,Rab<br>GDP dissociation inhibitor alpha |
| INSITVDNCK                                                  | 1105.5437 | 1105.5463 | 2        | 77.0  | P40124        | Adenylyl cyclase-associated protein 1                                       |
| TDGcHAYLSK +<br>Carbamidomethyl (C)                         | 1150.5077 | 1150.5136 | +2;+3    | 72.0  | P40124        | Adenylyl cyclase-associated protein 1                                       |
| NSLDCEIVSAK                                                 | 1177.5649 | 1177.5664 | 2        | 100.0 | P40124        | Adenylyl cyclase-associated protein 1                                       |
| GKINSITVDNCK                                                | 1290.6602 | 1290.6643 | 2        | 79.0  | P40124        | Adenylyl cyclase-associated protein 1                                       |
| VPTISINKTDGCHAYLSK                                          | 1945.9931 | 1946.0039 | +3;+4    | 56.0  | P40124        | Adenylyl cyclase-associated protein 1                                       |
| VPTISINKTDGcHAYLSK +<br>Carbamidomethyl (C)                 | 2003.0146 | 2003.032  | +3;+4    | 83.0  | P40124        | Adenylyl cyclase-associated protein 1                                       |
| DLNHVCVISETGK                                               | 1413.6922 | 1413.7019 | +2;+3    | 109.0 | P00493        | Hypoxanthine-guanine<br>phosphoribosyltransferase                           |
| DLNHVCVISETGK +<br>Carbamidomethyl (C)                      | 1470.7137 | 1470.7163 | +2;+3    | 109.0 | P00493        | Hypoxanthine-guanine<br>phosphoribosyltransferase                           |
| SPSVVISDDEPGYDLDFCIPNH<br>YAEDLEK                           | 3379.5442 | 3379.5634 | 3        | 61.0  | P00493        | Hypoxanthine-guanine<br>phosphoribosyltransferase                           |
| EcADLWPR +<br>Carbamidomethyl (C)                           | 1045.4651 | 1045.4758 | 2        | 54.0  | P62830        | 60S ribosomal protein L23                                                   |

|                                           |           |           |       |       |        |                                                                      |
|-------------------------------------------|-----------|-----------|-------|-------|--------|----------------------------------------------------------------------|
| ISGLPVGAVINCADNTGAK                       | 1912.0088 | 1912.0126 | +2;+3 | 118.0 | P62830 | 60S ribosomal protein L23                                            |
| VcNLIDSGTK                                | 1048.5223 | 1048.529  | 2     | 81.0  | Q9EQ20 | Methylmalonate-semialdehyde dehydrogenase [acylating], mitochondrial |
| VcNLIDSGTK + Carbamidomethyl (C)          | 1105.5438 | 1105.5474 | 2     | 75.0  | Q9EQ20 | Methylmalonate-semialdehyde dehydrogenase [acylating], mitochondrial |
| AEMDAAVESCK                               | 1152.4791 | 1152.4843 | 2     | 76.0  | Q9EQ20 | Methylmalonate-semialdehyde dehydrogenase [acylating], mitochondrial |
| AEMDAAVEScK + Carbamidomethyl (C)         | 1209.5005 | 1209.4987 | 2     | 82.0  | Q9EQ20 | Methylmalonate-semialdehyde dehydrogenase [acylating], mitochondrial |
| AEMDAAVESCKR                              | 1308.5802 | 1308.581  | 3     | 66.0  | Q9EQ20 | Methylmalonate-semialdehyde dehydrogenase [acylating], mitochondrial |
| ERVCNLIDSGTK                              | 1333.666  | 1333.6655 | +2;+3 | 80.0  | Q9EQ20 | Methylmalonate-semialdehyde dehydrogenase [acylating], mitochondrial |
| AEMDAAVEScKR + Carbamidomethyl (C)        | 1365.6017 | 1365.6067 | +2;+3 | 87.0  | Q9EQ20 | Methylmalonate-semialdehyde dehydrogenase [acylating], mitochondrial |
| YQVDPDACFSAK                              | 1342.5863 | 1342.5944 | 2     | 86.0  | Q60932 | Voltage-dependent anion-selective channel protein 1                  |
| YQVDPDAcFSAK + Carbamidomethyl (C)        | 1399.6078 | 1399.6102 | 2     | 74.0  | Q60932 | Voltage-dependent anion-selective channel protein 1                  |
| EHINLGCDVDFDIAGPSIR                       | 2069.984  | 2070.0052 | +2;+3 | 125.0 | Q60932 | Voltage-dependent anion-selective channel protein 1                  |
| EHINLGcDVDFDIAGPSIR + Carbamidomethyl (C) | 2127.0055 | 2127.0278 | 3     | 97.0  | Q60932 | Voltage-dependent anion-selective channel protein 1                  |
| KcPFTGNVSIR + Carbamidomethyl (C)         | 1277.655  | 1277.66   | +2;+3 | 86.0  | P62281 | 40S ribosomal protein S11                                            |
| NMSVHLSPCFR                               | 1289.6009 | 1289.6069 | +2;+3 | 75.0  | P62281 | 40S ribosomal protein S11                                            |
| DVQIGDIVTVGECRPLSK                        | 1928.0037 | 1928.0229 | +2;+3 | 113.0 | P62281 | 40S ribosomal protein S11                                            |
| DVQIGDIVTVGECRPLSK + Carbamidomethyl (C)  | 1985.0252 | 1985.0428 | +2;+3 | 87.0  | P62281 | 40S ribosomal protein S11                                            |
| QVIDCQLADVNNLGK                           | 1628.8192 | 1628.8352 | +2;+3 | 101.0 | Q9CPY7 | Cytosol aminopeptidase                                               |
| QVIDcQLADVNNLGK + Carbamidomethyl (C)     | 1685.8407 | 1685.8479 | +2;+3 | 127.0 | Q9CPY7 | Cytosol aminopeptidase                                               |
| LILADALCYAHTFNPK                          | 1788.9232 | 1788.9326 | +2;+3 | 120.0 | Q9CPY7 | Cytosol aminopeptidase                                               |
| MAGVDQHEGTIQVQGQ                          | 1696.7839 | 1696.7913 | 2     | 31.0  | Q8VCR7 | Protein ABHD14B                                                      |

|                                              |           |           |             |       |               |                                                                                                        |
|----------------------------------------------|-----------|-----------|-------------|-------|---------------|--------------------------------------------------------------------------------------------------------|
| GFVVPVPICTDKINAVDYASVK                       | 2306.1981 | 2306.2102 | +2;+3       | 136.0 | Q8VCR7        | Protein ABHD14B                                                                                        |
| EGGGGITcVLQDGR + Carbamidomethyl (C)         | 1417.662  | 1417.6768 | 2           | 113.0 | P36552        | Oxygen-dependent coproporphyrinogen-III oxidase, mitochondrial                                         |
| KEGGGGITcVLQDGR                              | 1488.7355 | 1488.7486 | +2;+3       | 141.0 | P36552        | Oxygen-dependent coproporphyrinogen-III oxidase, mitochondrial                                         |
| EAcDQHGPDIYPK + Carbamidomethyl (C)          | 1528.6616 | 1528.6645 | 3           | 48.0  | P36552        | Oxygen-dependent coproporphyrinogen-III oxidase, mitochondrial                                         |
| KEGGGGITcVLQDGR + Carbamidomethyl (C)        | 1545.757  | 1545.7701 | 2           | 152.0 | P36552        | Oxygen-dependent coproporphyrinogen-III oxidase, mitochondrial                                         |
| TLKEACDQHGPDIYPK                             | 1813.8669 | 1813.8771 | 3           | 38.0  | P36552        | Oxygen-dependent coproporphyrinogen-III oxidase, mitochondrial                                         |
| MTPTDSDPWAAVFGACK                            | 2084.8608 | 2084.8888 | +2;+3       | 136.0 | Q99JW2        | Aminoacylase-1                                                                                         |
| MTPTDSDPWAAVFGACK + Carbamidomethyl (C)      | 2141.8823 | 2141.9092 | +2;+3       | 120.0 | Q99JW2        | Aminoacylase-1                                                                                         |
| cGLQGFdGIV + Carbamidomethyl (C)             | 1064.4961 | 1064.5032 | +1;+2       | 59.0  | P97328        | Ketohexokinase                                                                                         |
| YADLTEDQLPSCESLK                             | 1810.8295 | 1810.8382 | 2           | 93.0  | Q9DBJ1        | Phosphoglycerate mutase 1                                                                              |
| YADLTEDQLPSCESLK + Carbamidomethyl (C)       | 1867.8509 | 1867.8575 | 2           | 105.0 | Q9DBJ1        | Phosphoglycerate mutase 1                                                                              |
| YADLTEDQLPSCESLKDIAR                         | 2367.1264 | 2367.1428 | +2;+3       | 140.0 | Q9DBJ1        | Phosphoglycerate mutase 1                                                                              |
| YADLTEDQLPSCESLKDIAR + Carbamidomethyl (C)   | 2424.1478 | 2424.1892 | +2;+3       | 139.0 | Q9DBJ1        | Phosphoglycerate mutase 1                                                                              |
| SAVSCLWAK                                    | 963.4848  | 963.4946  | 2           | 85.0  | P02089        | Hemoglobin subunit beta-2                                                                              |
| VHLTDAEKSAVSCLWAK                            | 1856.9454 | 1856.9596 | 2           | 115.0 | P02089        | Hemoglobin subunit beta-2                                                                              |
| SAVScLWAKVNPDEVGGEALGR + Carbamidomethyl (C) | 2314.1376 | 2314.1625 | +2;+3       | 109.0 | P02089        | Hemoglobin subunit beta-2                                                                              |
| cSGPGLER + Carbamidomethyl (C)               | 874.3967  | 874.3953  | 2           | 55.0  | Q8BTM8        | Filamin-A                                                                                              |
| TPCEEILVK                                    | 1030.5369 | 1030.543  | 2           | 49.0  | Q8BTM8        | Filamin-A                                                                                              |
| TPCEEILVK + Carbamidomethyl (C)              | 1087.5583 | 1087.5663 | 2           | 35.0  | Q8BTM8        | Filamin-A                                                                                              |
| GAGTGGLGLTVEGPCEAQ                           | 1615.7512 | 1615.7901 | 2           | 85.0  | Q8BTM8        | Filamin-A                                                                                              |
| LQVEPAVDTSQVQCYGPGIEGQGVFR                   | 2705.312  | 2705.3178 | +2;+3       | 143.0 | Q8BTM8        | Filamin-A                                                                                              |
| ACQIAHDHTDHVIR                               | 1614.7685 | 1614.7766 | +2;+3;+4;+5 | 104.0 | Q64462        | Cytochrome P450 4B1                                                                                    |
| AcQIAHDHTDHVIR + Carbamidomethyl (C)         | 1671.79   | 1671.7956 | +2;+3;+4;+5 | 118.0 | Q64462        | Cytochrome P450 4B1                                                                                    |
| QGFNLPIcMAK + Carbamidomethyl (C)            | 1334.6475 | 1334.6522 | 2           | 64.0  | Q922D8,Q3V3R1 | C-1-tetrahydrofolate synthase, cytoplasmic, Monofunctional C1-tetrahydrofolate synthase, mitochondrial |

|                                              |           |           |          |       |        |                                              |
|----------------------------------------------|-----------|-----------|----------|-------|--------|----------------------------------------------|
| YCAGEENWVDSR                                 | 1427.5776 | 1427.5936 | 2        | 126.0 | P98197 | Probable phospholipid-transporting ATPase IH |
| YcAGEENWVDSR + Carbamidomethyl (C)           | 1484.599  | 1484.6129 | 2        | 103.0 | P98197 | Probable phospholipid-transporting ATPase IH |
| RYCAGEENWVDSR                                | 1583.6787 | 1583.6961 | +2;+3    | 73.0  | P98197 | Probable phospholipid-transporting ATPase IH |
| IALFGAGPASICASFLAR                           | 1850.9713 | 1850.9871 | 2        | 149.0 | Q8CHR6 | Dihydropyrimidine dehydrogenase [NADP(+)]    |
| IALFGAGPASICASFLAR + Carbamidomethyl (C)     | 1907.9927 | 1908.0191 | 2        | 144.0 | Q8CHR6 | Dihydropyrimidine dehydrogenase [NADP(+)]    |
| VNQIGSVTESIQACK                              | 1575.7926 | 1575.8042 | 2        | 99.0  | P21550 | Beta-enolase                                 |
| VNQIGSVTESIQACK + Carbamidomethyl (C)        | 1632.8141 | 1632.8245 | 2        | 97.0  | P21550 | Beta-enolase                                 |
| SAYcPYSR + Carbamidomethyl (C)               | 1002.4229 | 1002.4241 | 2        | 53.0  | P56389 | Cytidine deaminase                           |
| cAVEPEHVQR + Carbamidomethyl (C)             | 1223.5717 | 1223.5774 | +2;+3    | 81.0  | P56389 | Cytidine deaminase                           |
| RPSCAVEPEHVQR                                | 1506.7361 | 1506.7355 | +3;+4    | 64.0  | P56389 | Cytidine deaminase                           |
| RPSCAVEPEHVQR + Carbamidomethyl (C)          | 1563.7576 | 1563.7692 | +2;+3;+4 | 112.0 | P56389 | Cytidine deaminase                           |
| IFSGcNIENAcYPLGVcAER + 3 Carbamidomethyl (C) | 2465.0814 | 2465.0762 | 2        | 108.0 | P56389 | Cytidine deaminase                           |
| LLCGGAAADR                                   | 1002.4917 | 1002.4947 | 2        | 93.0  | P47738 | Aldehyde dehydrogenase, mitochondrial        |
| LlCGGAAADR + Carbamidomethyl (C)             | 1059.5131 | 1059.5145 | 2        | 102.0 | P47738 | Aldehyde dehydrogenase, mitochondrial        |
| TFPTVNPSTGEVICQVAEGNKE DVDK                  | 2776.3226 | 2776.3491 | +2;+3    | 130.0 | P47738 | Aldehyde dehydrogenase, mitochondrial        |
| EcHYSITK + Carbamidomethyl (C)               | 1036.4648 | 1036.466  | +2;+3    | 35.0  | Q9DBE0 | Cysteine sulfinic acid decarboxylase         |
| FQRYPDCK                                     | 1055.4858 | 1055.4922 | +2;+3    | 52.0  | Q9DBE0 | Cysteine sulfinic acid decarboxylase         |
| VCEWKEPEELK                                  | 1388.6646 | 1388.6665 | +2;+3    | 92.0  | Q9DBE0 | Cysteine sulfinic acid decarboxylase         |
| VcEWKEPEELK + Carbamidomethyl (C)            | 1445.686  | 1445.6989 | +2;+3    | 75.0  | Q9DBE0 | Cysteine sulfinic acid decarboxylase         |
| cHGSQASYLFQQDK + Carbamidomethyl (C)         | 1667.7362 | 1667.7467 | +2;+3    | 78.0  | Q9DBE0 | Cysteine sulfinic acid decarboxylase         |
| FYDVALDTGDKVVQCGR                            | 1884.904  | 1884.9201 | 3        | 106.0 | Q9DBE0 | Cysteine sulfinic acid decarboxylase         |
| GPCIIYNEDNGIIK                               | 1547.7653 | 1547.7757 | 2        | 99.0  | Q9D8E6 | 60S ribosomal protein L4                     |
| GPcIIYNEDNGIIK + Carbamidomethyl (C)         | 1604.7868 | 1604.8059 | 2        | 83.0  | Q9D8E6 | 60S ribosomal protein L4                     |
| RGPCIIYNEDNGIIK                              | 1703.8665 | 1703.8722 | +2;+3    | 98.0  | Q9D8E6 | 60S ribosomal protein L4                     |
| KVICIPK                                      | 799.499   | 799.5054  | 2        | 56.0  | Q9JII6 | Alcohol dehydrogenase [NADP(+)]              |

|                                                                    |           |           |          |       |                          |                                                                        |
|--------------------------------------------------------------------|-----------|-----------|----------|-------|--------------------------|------------------------------------------------------------------------|
| HIDCASVYGNETEIGEALKESV<br>GSGK                                     | 2692.265  | 2692.2735 | +3;+4    | 183.0 | Q9JII6                   | Alcohol dehydrogenase [NADP(+)]                                        |
| QIDDLVLSVASVRPAVLQVECH<br>PYLAQNELIAHcHAR +<br>Carbamidomethyl (C) | 4119.0782 | 4119.1038 | 6        | 41.0  | Q9JII6                   | Alcohol dehydrogenase [NADP(+)]                                        |
| AAHPVPGSLDVCLITEAPLEEV<br>ER                                       | 2657.3734 | 2657.4014 | +2;+3    | 109.0 | Q9D8I3                   | Glyoxalase domain-containing protein 5                                 |
| AAHPVPGSLDVcLITEAPLEEV<br>ER + Carbamidomethyl (C)                 | 2714.3949 | 2714.4143 | 3        | 104.0 | Q9D8I3                   | Glyoxalase domain-containing protein 5                                 |
| cLLWFCGMSK +<br>Carbamidomethyl (C)                                | 1243.5552 | 1243.5612 | 2        | 67.0  | Q923I7                   | Sodium/glucose cotransporter 2                                         |
| ILYPDEVACVVPVcKR +<br>Carbamidomethyl (C)                          | 2057.0326 | 2057.0493 | 3        | 89.0  | Q923I7                   | Sodium/glucose cotransporter 2                                         |
| ILYPDEVAcVVPVcKR + 2<br>Carbamidomethyl (C)                        | 2114.054  | 2046.053  | 3        | 98.0  | Q923I7                   | Sodium/glucose cotransporter 2                                         |
| STcTYVGAAK +<br>Carbamidomethyl (C)                                | 1056.491  | 1056.4927 | 2        | 71.0  | Q9DCZ1,Q99L27            | GMP reductase 1,GMP reductase 2                                        |
| TGVGYPQLSAVIECADSAHGLK                                             | 2215.0943 | 2215.1068 | +2;+3    | 114.0 | Q9DCZ1                   | GMP reductase 1                                                        |
| TGVGYPQLSAVIEcADS<br>AHGLK + Carbamidomethyl (C)                   | 2272.1158 | 2272.1373 | +2;+3    | 117.0 | Q9DCZ1                   | GMP reductase 1                                                        |
| VIATFACSGEK                                                        | 1124.5536 | 1124.5586 | 2        | 89.0  | Q9JLJ2                   | 4-trimethylaminobutyraldehyde<br>dehydrogenase                         |
| AGAPPGLFNvVQGGAAATGQF<br>LcHHR + Carbamidomethyl<br>(C)            | 2561.271  | 2561.2956 | 4        | 84.0  | Q9JLJ2                   | 4-trimethylaminobutyraldehyde<br>dehydrogenase                         |
| VAAELQAGTcYINNYNVSPVEL<br>PFGGYKK +<br>Carbamidomethyl (C)         | 3201.5805 | 3201.6361 | +3;+4    | 105.0 | Q9JLJ2                   | 4-trimethylaminobutyraldehyde<br>dehydrogenase                         |
| CDVDIR                                                             | 719.3272  | 719.3286  | 2        | 45.0  | P60710,P63260,Q<br>8BFZ3 | Actin, cytoplasmic 1,Actin, cytoplasmic<br>2,Beta-actin-like protein 2 |
| FRcPEALF +<br>Carbamidomethyl (C)                                  | 1038.4957 | 1038.5029 | 2        | 51.0  | P60710,P63260            | Actin, cytoplasmic 1,Actin, cytoplasmic 2                              |
| FRcPEALFQPSFLG +<br>Carbamidomethyl (C)                            | 1667.813  | 1667.8181 | 2        | 83.0  | P60710,P63260            | Actin, cytoplasmic 1,Actin, cytoplasmic 2                              |
| cPEALFQPSFLGMEScGIHETTF<br>NSIMK + 2 Carbamidomethyl<br>(C)        | 3298.4807 | 3298.4878 | 3        | 124.0 | P60710,P63260            | Actin, cytoplasmic 1,Actin, cytoplasmic 2                              |
| EPVYVTSFCHQLR                                                      | 1577.7661 | 1577.7738 | +2;+3    | 74.0  | Q7TMS5                   | ATP-binding cassette sub-family G<br>member 2                          |
| EPVYVTSFcHQLR +<br>Carbamidomethyl (C)                             | 1634.7875 | 1634.8057 | +2;+3    | 81.0  | Q7TMS5                   | ATP-binding cassette sub-family G<br>member 2                          |
| GTSAFKEPVYVTSFCHQLR                                                | 2169.0677 | 2169.0869 | +2;+3;+4 | 118.0 | Q7TMS5                   | ATP-binding cassette sub-family G<br>member 2                          |



|                                                             |           |           |          |       |                             |                                                                                           |
|-------------------------------------------------------------|-----------|-----------|----------|-------|-----------------------------|-------------------------------------------------------------------------------------------|
| TIQFVDWCPTGFK                                               | 1540.7385 | 1540.7473 | 2        | 89.0  | P05214,P68369,P68373,Q9JJZ2 | Tubulin alpha-3 chain,Tubulin alpha-1A chain,Tubulin alpha-1C chain,Tubulin alpha-8 chain |
| TIQFVDWcPTGFKVGINYQPP<br>TVVPGDLAK +<br>Carbamidomethyl (C) | 3403.7275 | 3403.7809 | 3        | 93.0  | P05214,P68369,P68373,Q9JJZ2 | Tubulin alpha-3 chain,Tubulin alpha-1A chain,Tubulin alpha-1C chain,Tubulin alpha-8 chain |
| ACDEGHIPK                                                   | 1081.5226 | 1081.5257 | +2;+3    | 84.0  | Q9JHI5                      | Isovaleryl-CoA dehydrogenase,<br>mitochondrial                                            |
| GSNTcELVFEDCKVPAANVLSQ<br>ESK + Carbamidomethyl (C)         | 2792.2997 | 2792.3224 | 3        | 136.0 | Q9JHI5                      | Isovaleryl-CoA dehydrogenase,<br>mitochondrial                                            |
| TNELGDGGVGLVLQGLQNPTC<br>K                                  | 2212.1158 | 2212.1368 | +2;+3    | 151.0 | Q91VI7                      | Ribonuclease inhibitor                                                                    |
| HGEVCPAGWKPGSDTIKPDV<br>NK                                  | 2334.1427 | 2334.1583 | +3;+4;+5 | 97.0  | P35700                      | Peroxisomal acyl-coenzyme A oxidase 1                                                     |
| HGEVcPAGWKPGSDTIKPDVN<br>K + Carbamidomethyl (C)            | 2391.1641 | 2391.1788 | +3;+4    | 102.0 | P35700                      | Peroxisomal acyl-coenzyme A oxidase 1                                                     |
| LNcQVIGASVDSHFCHLAWINT<br>PK + Carbamidomethyl (C)          | 2777.3418 | 2777.3437 | 3        | 72.0  | P35700                      | Peroxisomal acyl-coenzyme A oxidase 1                                                     |
| KLNCQVIGASVDSHFCHLAWI<br>NTPK + Carbamidomethyl (C)         | 2837.4105 | 2837.4387 | 4        | 67.0  | P35700                      | Peroxisomal acyl-coenzyme A oxidase 1                                                     |
| TIYAGNALCTVK                                                | 1252.6485 | 1252.6576 | 2        | 93.0  | Q99LC5                      | Electron transfer flavoprotein subunit<br>alpha, mitochondrial                            |
| cDKVVQDLcK + 2<br>Carbamidomethyl (C)                       | 1331.6214 | 1331.6285 | +2;+3    | 104.0 | Q99LC5                      | Electron transfer flavoprotein subunit<br>alpha, mitochondrial                            |
| ACTIAIR                                                     | 746.4109  | 746.4098  | 2        | 71.0  | Q9R0H0                      | Peroxisomal acyl-coenzyme A oxidase 1                                                     |
| ASEAHCHYVTVK                                                | 1343.6292 | 1343.6297 | +2;+3;+4 | 82.0  | Q9R0H0                      | Peroxisomal acyl-coenzyme A oxidase 1                                                     |
| ASEAHcHYVTVK +<br>Carbamidomethyl (C)                       | 1400.6507 | 1400.6525 | +2;+3;+4 | 78.0  | Q9R0H0                      | Peroxisomal acyl-coenzyme A oxidase 1                                                     |
| SPGAcPALGAK +<br>Carbamidomethyl (C)                        | 1027.5121 | 1027.5143 | 2        | 96.0  | Q9ES97                      | Reticulon-3                                                                               |
| SSGAEPSALGGGGSPGACPA<br>LGAK                                | 2054.9691 | 2054.998  | 2        | 146.0 | Q9ES97                      | Reticulon-3                                                                               |
| ILADSINSEVGILCHALQK                                         | 2023.0772 | 2023.0986 | +2;+3    | 112.0 | P16331                      | Phenylalanine-4-hydroxylase                                                               |
| AYGAGLLSSFELQYCLSDKPK                                       | 2346.1566 | 2346.1743 | 3        | 128.0 | P16331                      | Phenylalanine-4-hydroxylase                                                               |
| cPVIIHPGR +<br>Carbamidomethyl (C)                          | 1047.5648 | 1047.573  | +2;+3    | 58.0  | Q60866                      | Phosphotriesterase-related protein                                                        |
| ILEATAHAQAQLGCPVIIHPGR                                      | 2294.2317 | 2294.2378 | +3;+4    | 142.0 | Q60866                      | Phosphotriesterase-related protein                                                        |
| KILEATAHAQAQLGCPVIIHPG<br>R                                 | 2422.3267 | 2422.3525 | +3;+4;+5 | 136.0 | Q60866                      | Phosphotriesterase-related protein                                                        |
| KILEATAHAQAQLGcPVIIHPG<br>R + Carbamidomethyl (C)           | 2479.3482 | 2479.356  | +3;+4;+5 | 93.0  | Q60866                      | Phosphotriesterase-related protein                                                        |

|                                                    |           |           |          |       |                      |                                                                                                           |
|----------------------------------------------------|-----------|-----------|----------|-------|----------------------|-----------------------------------------------------------------------------------------------------------|
| KPIGLcCIAPV + Carbamidomethyl (C)                  | 1237.6563 | 1237.6608 | 2        | 74.0  | Q9D172               | ES1 protein homolog, mitochondrial                                                                        |
| KPIGLcCIAPVLAAK + Carbamidomethyl (C)              | 1620.9095 | 1620.9148 | +2;+3    | 121.0 | Q9D172               | ES1 protein homolog, mitochondrial                                                                        |
| KPIGLcCIAPVLAAK + 2 Carbamidomethyl (C)            | 1677.931  | 1677.9435 | +2;+3    | 109.0 | Q9D172               | ES1 protein homolog, mitochondrial                                                                        |
| KPIGLcCIAPVLAAKVIK + Carbamidomethyl (C)           | 1961.157  | 1961.1567 | 3        | 65.0  | Q9D172               | ES1 protein homolog, mitochondrial                                                                        |
| INISEGNCPER                                        | 1230.5663 | 1230.568  | 2        | 87.0  | P60335,Q61990,P57722 | Poly(rC)-binding protein 1,Poly(rC)-binding protein 2,Poly(rC)-binding protein 3                          |
| LVVPATQcGSLIGK + Carbamidomethyl (C)               | 1441.7963 | 1441.8058 | 2        | 98.0  | P60335               | Poly(rC)-binding protein 1                                                                                |
| DLAACIK                                            | 732.384   | 732.3874  | 2        | 46.0  | O88844               | Isocitrate dehydrogenase [NADP] cytoplasmic                                                               |
| DLAAcIK + Carbamidomethyl (C)                      | 789.4055  | 789.4091  | 2        | 46.0  | O88844               | Isocitrate dehydrogenase [NADP] cytoplasmic                                                               |
| IcYEHR + Carbamidomethyl (C)                       | 876.3912  | 876.3917  | 2        | 54.0  | O88844               | Isocitrate dehydrogenase [NADP] cytoplasmic                                                               |
| EAAALGSHGScSSEVEKETR + Carbamidomethyl (C)         | 2103.9491 | 2103.9643 | +2;+3;+4 | 127.0 | Q9CR51               | V-type proton ATPase subunit G 1                                                                          |
| ASCLPVYR                                           | 907.4586  | 907.4604  | 2        | 73.0  | Q99LB7               | Sarcosine dehydrogenase, mitochondrial                                                                    |
| RDPLHEELGQGCVFQER                                  | 2125.0375 | 2125.0427 | +3;+4    | 106.0 | Q99LB7               | Sarcosine dehydrogenase, mitochondrial                                                                    |
| AKVAPEEVSEVIFGHVLTAGcG QNPTR + Carbamidomethyl (C) | 2865.4443 | 2865.4625 | 4        | 116.0 | Q8CAY6               | Acetyl-CoA acetyltransferase, cytosolic                                                                   |
| IISANGCK                                           | 804.4164  | 804.4154  | 2        | 69.0  | Q8VDN2               | Sodium/potassium-transporting ATPase subunit alpha-1                                                      |
| cSSILLHGK + Carbamidomethyl (C)                    | 1013.5328 | 1013.5354 | +2;+3    | 63.0  | Q8VDN2               | Sodium/potassium-transporting ATPase subunit alpha-1                                                      |
| ACVVHGSDLK                                         | 1027.5121 | 1027.5124 | +2;+3    | 82.0  | Q8VDN2,Q6PIE5        | Sodium/potassium-transporting ATPase subunit alpha-1,Sodium/potassium-transporting ATPase subunit alpha-2 |
| GFTGIDSDYEKPETPECVLK                               | 2227.0355 | 2227.0502 | +2;+3    | 92.0  | O88428               | Bifunctional 3'-phosphoadenosine 5'-phosphosulfate synthase 2                                             |
| GFTGIDSDYEKPETPECVLK + Carbamidomethyl (C)         | 2284.0569 | 2284.0624 | +2;+3    | 108.0 | O88428               | Bifunctional 3'-phosphoadenosine 5'-phosphosulfate synthase 2                                             |

|                                                         |           |           |          |       |               |                                                       |
|---------------------------------------------------------|-----------|-----------|----------|-------|---------------|-------------------------------------------------------|
| VDCTANTNTcNK + Carbamidomethyl (C)                      | 1407.5759 | 1407.5706 | 2        | 94.0  | P27773        | Protein disulfide-isomerase A3                        |
| LVPASQcGSLIGK + Carbamidomethyl (C)                     | 1427.7806 | 1427.7811 | 2        | 100.0 | Q61990,P57722 | Poly(rC)-binding protein 2,Poly(rC)-binding protein 3 |
| HcQEFLGSSEVINWK + Carbamidomethyl (C)                   | 1832.8516 | 1832.8713 | +2;+3    | 121.0 | Q9DCY0        | Glycine N-acyltransferase-like protein Keg1           |
| HcQEFLGSSEVINWKQHLQIQS<br>SQSDLGK + Carbamidomethyl (C) | 3382.6364 | 3382.6519 | 4        | 47.0  | Q9DCY0        | Glycine N-acyltransferase-like protein Keg1           |
| STGPHAAScFGAK + Carbamidomethyl (C)                     | 1289.5823 | 1289.5817 | +2;+3    | 104.0 | P30999        | Catenin delta-1                                       |
| YQEALPTVANSTGPHAAScFG<br>AK                             | 2319.0954 | 2319.103  | 3        | 134.0 | P30999        | Catenin delta-1                                       |
| AQCPIVER                                                | 914.4644  | 914.4719  | 2        | 66.0  | P97461        | 40S ribosomal protein S5                              |
| AQCPIVER + Carbamidomethyl (C)                          | 971.4858  | 971.4927  | 2        | 58.0  | P97461        | 40S ribosomal protein S5                              |
| VNQAIWLLCTGAR                                           | 1443.7656 | 1443.7798 | +2;+3    | 99.0  | P97461        | 40S ribosomal protein S5                              |
| RVNQAIWLLcTGAR + Carbamidomethyl (C)                    | 1656.8882 | 1656.8973 | +2;+3    | 97.0  | P97461        | 40S ribosomal protein S5                              |
| SYCAEIAHNVSSK                                           | 1407.6452 | 1407.6505 | +2;+3    | 86.0  | P62911        | 60S ribosomal protein L32                             |
| SYcAEIAHNVSSK + Carbamidomethyl (C)                     | 1464.6667 | 1464.6711 | +2;+3    | 92.0  | P62911        | 60S ribosomal protein L32                             |
| QREESQQAVALAQECR                                        | 2030.9439 | 2030.967  | +2;+3    | 129.0 | Q64331        | Unconventional myosin-VI                              |
| VLFPPDDVGCvVPSEcLR + Carbamidomethyl (C)                | 1971.9435 | 1971.963  | 2        | 128.0 | Q5SWY8        | Sodium/glucose cotransporter 5                        |
| VLFPPDDVGCvVPSECLR + Carbamidomethyl (C)                | 1971.9435 | 1971.9672 | 2        | 95.0  | Q5SWY8        | Sodium/glucose cotransporter 5                        |
| ILEGSGATEFHcSAR + Carbamidomethyl (C)                   | 1633.7518 | 1633.7647 | +2;+3    | 120.0 | Q9D8X1        | Copper homeostasis protein cutC homolog               |
| VcENIPIVLCGNK + Carbamidomethyl (C)                     | 1525.7633 | 1525.7666 | 2        | 75.0  | P62827        | GTP-binding nuclear protein Ran                       |
| VcENIPIVLCGNK + 2 Carbamidomethyl (C)                   | 1582.7847 | 1582.795  | 2        | 49.0  | P62827        | GTP-binding nuclear protein Ran                       |
| VcENIPIVLCGNKVDIK + Carbamidomethyl (C)                 | 1981.0376 | 1981.071  | +2;+3    | 71.0  | P62827        | GTP-binding nuclear protein Ran                       |
| VcENIPIVLCGNKVDIK + 2 Carbamidomethyl (C)               | 2038.0591 | 2038.0788 | +2;+3    | 91.0  | P62827        | GTP-binding nuclear protein Ran                       |
| VLHEAEGHIVTCETNTGEVYR                                   | 2356.1118 | 2356.1269 | +3;+4    | 100.0 | P62320        | Small nuclear ribonucleoprotein Sm D3                 |
| HNSYTCEATHK                                             | 1289.5459 | 1289.5431 | +2;+3    | 67.0  | P01837        | Ig kappa chain C region                               |
| ILQLcMGNHELYMR + Carbamidomethyl (C)                    | 1776.8473 | 1776.853  | +2;+3;+4 | 110.0 | P26040        | Ezrin                                                 |
| DGILSDEIYCPPETAVLLGSYAV<br>QAK                          | 2751.3677 | 2751.382  | +2;+3    | 86.0  | P26040        | Ezrin                                                 |
| DGILSDEIYcPPETAVLLGSYAV<br>QAK + Carbamidomethyl (C)    | 2808.3891 | 2808.4098 | +2;+3    | 138.0 | P26040        | Ezrin                                                 |
| HIGDGCHLTR                                              | 1107.5244 | 1107.5289 | 3        | 80.0  | Q9DD20        | Methyltransferase-like protein 7B                     |
| VTCVDPNPFEK                                             | 1361.6286 | 1361.6358 | 2        | 98.0  | Q9DD20        | Methyltransferase-like protein 7B                     |
| VTcVDPNPFEK + Carbamidomethyl (C)                       | 1418.65   | 1418.6453 | 2        | 84.0  | Q9DD20        | Methyltransferase-like protein 7B                     |

|                                               |           |           |       |       |        |                                                            |
|-----------------------------------------------|-----------|-----------|-------|-------|--------|------------------------------------------------------------|
| IIKPCNHVLSLSPFIRR                             | 1992.1455 | 1992.1559 | +4;+5 | 78.0  | P26443 | Glutamate dehydrogenase 1, mitochondrial                   |
| IIKPCNHVLSLSPFIRR + Carbamidomethyl (C)       | 2049.1669 | 2049.1722 | +4;+5 | 58.0  | P26443 | Glutamate dehydrogenase 1, mitochondrial                   |
| VYEGSILEADCILIPAASEK                          | 2235.098  | 2235.1213 | 3     | 40.0  | P26443 | Glutamate dehydrogenase 1, mitochondrial                   |
| AFCHKFFK + Carbamidomethyl (C)                | 1083.5324 | 1083.5325 | +2;+3 | 41.0  | Q6ZQM8 | UDP-glucuronosyltransferase 1-7C                           |
| GIFcHYLEDAAQcPSPSYIPR + 2 Carbamidomethyl (C) | 2577.1781 | 2645.2219 | 3     | 92.0  | Q6ZQM8 | UDP-glucuronosyltransferase 1-7C                           |
| VQCVPKEPHSFQSR                                | 1640.8093 | 1640.81   | +3;+4 | 59.0  | Q9JK81 | UPF0160 protein MYG1, mitochondrial                        |
| VQCVPKEPHSFQSR + Carbamidomethyl (C)          | 1697.8308 | 1697.8314 | 3     | 62.0  | Q9JK81 | UPF0160 protein MYG1, mitochondrial                        |
| LASCDIVVDVGGEYNPQSHR                          | 2158.0113 | 2158.0297 | 3     | 116.0 | Q9JK81 | UPF0160 protein MYG1, mitochondrial                        |
| YcQVIR + Carbamidomethyl (C)                  | 837.4167  | 837.4168  | 2     | 35.0  | P27659 | 60S ribosomal protein L3                                   |
| clGAWHPAR + Carbamidomethyl (C)               | 1066.5131 | 1066.5197 | 3     | 63.0  | P27659 | 60S ribosomal protein L3                                   |
| VACIGAWHPAR                                   | 1179.5971 | 1179.6091 | +2;+3 | 85.0  | P27659 | 60S ribosomal protein L3                                   |
| TFDTFcPLGPLVTK + Carbamidomethyl (C)          | 1665.8437 | 1665.8499 | 2     | 105.0 | Q3TC72 | Fumarylacetoacetate hydrolase domain-containing protein 2A |
| KGDEVQCEIEELGVIINK                            | 2015.0245 | 2015.0332 | +2;+3 | 145.0 | Q3TC72 | Fumarylacetoacetate hydrolase domain-containing protein 2A |
| VICVGLNYADHcQEQNVR + Carbamidomethyl (C)      | 2185.0045 | 2185.03   | 3     | 106.0 | Q3TC72 | Fumarylacetoacetate hydrolase domain-containing protein 2A |
| TPVcTTELGR + Carbamidomethyl (C)              | 1132.5547 | 1132.5534 | 2     | 78.0  | O08709 | Peroxiredoxin-6                                            |
| DFTPVCTELGR                                   | 1337.6286 | 1337.6378 | 2     | 86.0  | O08709 | Peroxiredoxin-6                                            |
| DFTPVCTELGR + Carbamidomethyl (C)             | 1394.65   | 1394.6619 | 2     | 91.0  | O08709 | Peroxiredoxin-6                                            |
| FELTCYSLAPQIK                                 | 1511.7694 | 1511.7737 | 2     | 85.0  | P16460 | Argininosuccinate synthase                                 |
| GYGPIQLPDYNR                                  | 1520.7259 | 1520.7128 | 2     | 47.0  | Q9CZ13 | Cytochrome b-c1 complex subunit 1, mitochondrial           |
| VYEEDAVPGLTPCR                                | 1547.729  | 1547.7363 | 2     | 104.0 | Q9CZ13 | Cytochrome b-c1 complex subunit 1, mitochondrial           |
| NALVSHLDGTTVPVEDIGR                           | 1995.9684 | 1995.983  | +2;+3 | 127.0 | Q9CZ13 | Cytochrome b-c1 complex subunit 1, mitochondrial           |
| GHYNNVSCAVFHPR                                | 1599.7365 | 1599.7416 | 3     | 97.0  | Q8CIE6 | Coatomer subunit alpha                                     |
| GHYNNVSCAVFHPR + Carbamidomethyl (C)          | 1656.7579 | 1656.7645 | +2;+3 | 101.0 | Q8CIE6 | Coatomer subunit alpha                                     |
| AQNVPLPVSTLVEFVIAATDCTAK                      | 2486.3091 | 2486.321  | 3     | 121.0 | P29699 | Alpha-2-HS-glycoprotein                                    |

|                                                                 |           |           |          |       |        |                                                               |
|-----------------------------------------------------------------|-----------|-----------|----------|-------|--------|---------------------------------------------------------------|
| AQNVLPVSTLVEFVIAATDcT<br>AKEVTDPAK +<br>Carbamidomethyl (C)     | 3283.701  | 3283.7068 | 3        | 80.0  | P29699 | Alpha-2-HS-glycoprotein                                       |
| ACVDSNENGDSLK                                                   | 1350.5721 | 1350.5715 | 2        | 125.0 | Q64514 | Tripeptidyl-peptidase 2                                       |
| AcVDSNENGDSLK +<br>Carbamidomethyl (C)                          | 1407.5936 | 1407.5985 | 2        | 89.0  | Q64514 | Tripeptidyl-peptidase 2                                       |
| VDVHFcGVNFADILAcR + 2<br>Carbamidomethyl (C)                    | 2059.9608 | 2059.9772 | 3        | 70.0  | Q3UNZ8 | Quinone oxidoreductase-like protein 2                         |
| AALCTELKQPLTIQEVAPRPVG<br>PQEVr                                 | 2942.6011 | 2942.6144 | +3;+4    | 88.0  | Q3UNZ8 | Quinone oxidoreductase-like protein 2                         |
| GLVVLGFPcNQFGHQENgK +<br>Carbamidomethyl (C)                    | 2100.0211 | 2100.048  | +2;+3    | 106.0 | P11352 | Glutathione peroxidase 1                                      |
| LLYECNPIAYVMEK                                                  | 1684.8204 | 1684.8242 | 2        | 95.0  | Q9QXD6 | Fructose-1,6-bisphosphatase 1                                 |
| cAFVLT R + Carbamidomethyl<br>(C)                               | 865.448   | 865.4515  | 2        | 48.0  | P82343 | N-acylglucosamine 2-epimerase                                 |
| DGQVVLENVSEDGKELPGCLG<br>R                                      | 2313.1271 | 2313.1514 | 3        | 95.0  | P82343 | N-acylglucosamine 2-epimerase                                 |
| DGQVVLENVSEDGKELPGcLG<br>R + Carbamidomethyl (C)                | 2370.1485 | 2370.1654 | 3        | 94.0  | P82343 | N-acylglucosamine 2-epimerase                                 |
| IRDESASCSWNK                                                    | 1394.6248 | 1394.6263 | +2;+3    | 84.0  | Q3TNA1 | Xylulose kinase                                               |
| INGcAIQCR +<br>Carbamidomethyl (C)                              | 1101.5059 | 1101.5114 | 2        | 66.0  | Q05920 | Pyruvate carboxylase, mitochondrial                           |
| HHcPNTPIILVGTK +<br>Carbamidomethyl (C)                         | 1585.8399 | 1585.8439 | +2;+3    | 86.0  | P63001 | Ras-related C3 botulinum toxin substrate<br>1                 |
| TIAPCQK                                                         | 759.3949  | 759.3963  | 2        | 48.0  | P38647 | Stress-70 protein, mitochondrial                              |
| RTIAPcQK +<br>Carbamidomethyl (C)                               | 972.5175  | 972.5188  | 2        | 44.0  | P38647 | Stress-70 protein, mitochondrial                              |
| MEEFKDQLPADECNK                                                 | 1795.7757 | 1795.7901 | +2;+3    | 117.0 | P38647 | Stress-70 protein, mitochondrial                              |
| TGVACSVSQAQK                                                    | 1177.5761 | 1177.5718 | 2        | 113.0 | P51410 | 60S ribosomal protein L9                                      |
| TGVAcSVSQAQK +<br>Carbamidomethyl (C)                           | 1234.5976 | 1234.5988 | 2        | 90.0  | P51410 | 60S ribosomal protein L9                                      |
| QQWITPFTNGDKIGcFALSEP<br>NGSDAGAASSTAR                          | 3567.6689 | 3567.6904 | 3        | 104.0 | Q07417 | Short-chain specific acyl-CoA<br>dehydrogenase, mitochondrial |
| QQWITPFTNGDKIGcFALSEP<br>NGSDAGAASSTAR +<br>Carbamidomethyl (C) | 3624.6903 | 3624.7474 | +3;+4    | 104.0 | Q07417 | Short-chain specific acyl-CoA<br>dehydrogenase, mitochondrial |
| GEVGLLVCK                                                       | 916.5052  | 916.5127  | 2        | 65.0  | O35488 | Very long-chain acyl-CoA synthetase                           |
| SLLHCFQccGAK + 2<br>Carbamidomethyl (C)                         | 1558.6731 | 1558.6748 | +2;+3    | 57.0  | O35488 | Very long-chain acyl-CoA synthetase                           |
| SLLHcFQCCGAK + 2<br>Carbamidomethyl (C)                         | 1558.6731 | 1558.6827 | +2;+3    | 70.0  | O35488 | Very long-chain acyl-CoA synthetase                           |
| AKSLLHcFQCCGAK + 2<br>Carbamidomethyl (C)                       | 1757.8051 | 1757.8095 | +2;+3;+4 | 60.0  | O35488 | Very long-chain acyl-CoA synthetase                           |
| AKSLLHCFQccGAK + 2<br>Carbamidomethyl (C)                       | 1757.8051 | 1757.8158 | +2;+4    | 58.0  | O35488 | Very long-chain acyl-CoA synthetase                           |
| GEVGLLVCKITQLTPFIGYAGG<br>K                                     | 2363.2923 | 2363.2221 | 3        | 43.0  | O35488 | Very long-chain acyl-CoA synthetase                           |

|                                             |           |           |          |       |        |                                                                 |
|---------------------------------------------|-----------|-----------|----------|-------|--------|-----------------------------------------------------------------|
| YIPICPVFR                                   | 1106.5947 | 1106.6007 | 2        | 66.0  | Q9Z2J0 | Solute carrier family 23 member 1                               |
| YIPICPVFRGFSK                               | 1525.8115 | 1525.8222 | +2;+3    | 61.0  | Q9Z2J0 | Solute carrier family 23 member 1                               |
| YIPicPVFRGFSK + Carbamidomethyl (C)         | 1582.833  | 1582.8514 | +2;+3    | 77.0  | Q9Z2J0 | Solute carrier family 23 member 1                               |
| TGSQGQCTQVR                                 | 1163.5353 | 1163.5403 | 2        | 100.0 | P62858 | 40S ribosomal protein S28                                       |
| VYcGHEYTVNNLK + Carbamidomethyl (C)         | 1595.7402 | 1595.7604 | +2;+3    | 108.0 | Q99KB8 | Hydroxyacylglutathione hydrolase, mitochondrial                 |
| VCEEIAIIPSK                                 | 1200.6424 | 1200.6497 | 2        | 110.0 | P63276 | 40S ribosomal protein S17                                       |
| VcEEIAIIPSK + Carbamidomethyl (C)           | 1257.6638 | 1257.6691 | 2        | 94.0  | P63276 | 40S ribosomal protein S17                                       |
| VGFGQCAGK                                   | 865.4116  | 865.4175  | 2        | 72.0  | P35505 | Fumarylacetoacetase                                             |
| VGFGQcAGK + Carbamidomethyl (C)             | 922.4331  | 922.4348  | 2        | 72.0  | P35505 | Fumarylacetoacetase                                             |
| TFLLDGDEVIITGHQCQGDGYR                      | 2308.0794 | 2308.0968 | +2;+3    | 125.0 | P35505 | Fumarylacetoacetase                                             |
| SLVANLAAANCYKK                              | 1464.7758 | 1464.7853 | +2;+3    | 108.0 | P55264 | Adenosine kinase                                                |
| cVFEHGLLTVAYK + Carbamidomethyl (C)         | 1723.8604 | 1723.8728 | +2;+3    | 91.0  | Q64516 | Glycerol kinase                                                 |
| TScEFTGDILR + Carbamidomethyl (C)           | 1297.5973 | 1297.6089 | 2        | 85.0  | P62814 | V-type proton ATPase subunit B, brain isoform                   |
| KTScEFTGDILR + Carbamidomethyl (C)          | 1425.6922 | 1425.7032 | +2;+3    | 89.0  | P62814 | V-type proton ATPase subunit B, brain isoform                   |
| EIIAVScGPSQCQETIR + Carbamidomethyl (C)     | 1957.9237 | 1957.9497 | 2        | 141.0 | Q9DCW4 | Electron transfer flavoprotein subunit beta                     |
| YAGLKPEELPTcESLKDITAR + Carbamidomethyl (C) | 2390.2151 | 2390.2289 | +3;+4    | 117.0 | O70250 | Phosphoglycerate mutase 2                                       |
| VLcMDAK + Carbamidomethyl (C)               | 835.3932  | 835.3969  | 2        | 45.0  | Q9Z2I9 | Succinate--CoA ligase [ADP-forming] subunit beta, mitochondrial |
| ICNQVLVcER + Carbamidomethyl (C)            | 1300.6268 | 1300.6307 | 2        | 68.0  | Q9Z2I9 | Succinate--CoA ligase [ADP-forming] subunit beta, mitochondrial |
| VGvYDKDCDCFR + Carbamidomethyl (C)          | 1543.6436 | 1543.696  | +2;+3    | 64.0  | P28825 | Meprin A subunit alpha                                          |
| DDADWAHGdSSQPEQVDHTL VGQCK                  | 2737.1675 | 2737.1814 | +3;+4    | 139.0 | P28825 | Meprin A subunit alpha                                          |
| KDFEScLGAK                                  | 1096.5223 | 1096.5316 | 2        | 99.0  | P28271 | Cytoplasmic aconitate hydratase                                 |
| TVVPcCSGPK + Carbamidomethyl (C)            | 1114.5151 | 1114.5253 | 2        | 59.0  | P28271 | Cytoplasmic aconitate hydratase                                 |
| KDFEScLGAK + Carbamidomethyl (C)            | 1153.5437 | 1153.5516 | +2;+3    | 91.0  | P28271 | Cytoplasmic aconitate hydratase                                 |
| TYFPHFVSHGSAQVK                             | 1818.869  | 1818.8943 | +2;+3;+4 | 91.0  | P01942 | Hemoglobin subunit alpha                                        |
| SLPCILNAR                                   | 985.5379  | 985.5422  | 2        | 64.0  | P16125 | L-lactate dehydrogenase B chain                                 |
| AAGFPTASVCR                                 | 1078.523  | 1078.5305 | 2        | 86.0  | Q5U5V2 | Hydroxylysine kinase                                            |

|                                                      |           |           |       |      |               |                                                                                                                  |
|------------------------------------------------------|-----------|-----------|-------|------|---------------|------------------------------------------------------------------------------------------------------------------|
| VGAFTVVK                                             | 922.4946  | 922.5045  | +1;+2 | 76.0 | P05202        | Aspartate aminotransferase, mitochondrial                                                                        |
| VGAFTVVKDAEEAK                                       | 1565.7759 | 1565.78   | 3     | 87.0 | P05202        | Aspartate aminotransferase, mitochondrial                                                                        |
| cSVNLANKR + Carbamidomethyl (C)                      | 1060.5447 | 1060.553  | 3     | 42.0 | P97447        | Four and a half LIM domains protein 1                                                                            |
| FDcHYcR + 2 Carbamidomethyl (C)                      | 1124.4168 | 1124.4238 | 3     | 30.0 | P97447        | Four and a half LIM domains protein 1                                                                            |
| YWHDNCFR                                             | 1139.4607 | 1139.4662 | 3     | 39.0 | P97447        | Four and a half LIM domains protein 1                                                                            |
| FVFHNEQVYcPDCAK + Carbamidomethyl (C)                | 1923.8284 | 1923.8381 | 3     | 81.0 | P97447        | Four and a half LIM domains protein 1                                                                            |
| FVFHNEQVYcPDCAK + 2 Carbamidomethyl (C)              | 1980.8499 | 1980.8799 | +2;+3 | 81.0 | P97447        | Four and a half LIM domains protein 1                                                                            |
| TVHQNSIFHCPTQAQAAVAQC<br>FER                         | 2685.254  | 2685.2715 | 3     | 77.0 | Q8BTY1        | Kynurenine--oxoglutarate transaminase 1                                                                          |
| TVHQNSIFHCPTQAQAAVAQC<br>FER + 2 Carbamidomethyl (C) | 2799.297  | 2799.319  | +3;+4 | 92.0 | Q8BTY1        | Kynurenine--oxoglutarate transaminase 1                                                                          |
| FRcPEAIF + Carbamidomethyl (C)                       | 1038.4957 | 1038.5029 | 2     | 51.0 | Q8BFZ3        | Beta-actin-like protein 2                                                                                        |
| FRcPEAIFQPSFLG + Carbamidomethyl (C)                 | 1667.813  | 1667.8181 | 2     | 83.0 | Q8BFZ3        | Beta-actin-like protein 2                                                                                        |
| AFQCSR                                               | 710.317   | 710.3185  | 2     | 46.0 | Q9CXN7,Q9DCG6 | Phenazine biosynthesis-like domain-containing protein 2, Phenazine biosynthesis-like domain-containing protein 1 |
| GNPAAVCLLER                                          | 1141.5914 | 1141.597  | 2     | 78.0 | Q9CXN7,Q9DCG6 | Phenazine biosynthesis-like domain-containing protein 2, Phenazine biosynthesis-like domain-containing protein 1 |
| GNPAAVCLLER + Carbamidomethyl (C)                    | 1198.6128 | 1198.6198 | 2     | 82.0 | Q9CXN7,Q9DCG6 | Phenazine biosynthesis-like domain-containing protein 2, Phenazine biosynthesis-like domain-containing protein 1 |
| SPGENCQHQLAK                                         | 1310.6037 | 1310.6057 | +2;+3 | 66.0 | A3KMP2        | Tetratricopeptide repeat protein 38                                                                              |
| SPGENCQHQLAK + Carbamidomethyl (C)                   | 1367.6252 | 1367.635  | +2;+3 | 79.0 | A3KMP2        | Tetratricopeptide repeat protein 38                                                                              |
| cYIAVAR + Carbamidomethyl (C)                        | 851.4323  | 851.4402  | 2     | 49.0 | P48722,Q61699 | Heat shock 70 kDa protein 4L, Heat shock protein 105 kDa                                                         |

|                                                                |           |           |          |       |        |                                                    |
|----------------------------------------------------------------|-----------|-----------|----------|-------|--------|----------------------------------------------------|
| cHAHTPEEEIDHTGAK + Carbamidomethyl (C)                         | 1959.8381 | 1959.849  | +3;+4    | 94.0  | P48722 | Heat shock 70 kDa protein 4L                       |
| GHGLTCEGQPVTSR                                                 | 1440.678  | 1440.6796 | 3        | 78.0  | A2AJL3 | FGGY carbohydrate kinase domain-containing protein |
| GHGLTCEGQPVTSR + Carbamidomethyl (C)                           | 1497.6994 | 1497.7005 | +2;+3    | 63.0  | A2AJL3 | FGGY carbohydrate kinase domain-containing protein |
| VGEGPGVcWLAPEQTAGK + Carbamidomethyl (C)                       | 1854.8934 | 1854.9124 | 2        | 131.0 | Q8VCT3 | Aminopeptidase B                                   |
| ALVDGPCTR                                                      | 930.4593  | 930.4624  | 2        | 89.0  | Q9CR57 | 60S ribosomal protein L14                          |
| AGAIAPcEVTVPAQNTGLGPE K + Carbamidomethyl (C)                  | 2179.0943 | 2179.108  | +2;+3    | 138.0 | P14869 | 60S acidic ribosomal protein P0                    |
| LLFcTGK + Carbamidomethyl (C)                                  | 837.4419  | 837.4443  | 2        | 54.0  | Q60597 | 2-oxoglutarate dehydrogenase, mitochondrial        |
| RLLFcTGK + Carbamidomethyl (C)                                 | 993.543   | 993.5478  | 2        | 53.0  | Q60597 | 2-oxoglutarate dehydrogenase, mitochondrial        |
| IcEEAFTR + Carbamidomethyl (C)                                 | 1024.4648 | 1024.4742 | 2        | 56.0  | Q60597 | 2-oxoglutarate dehydrogenase, mitochondrial        |
| VVNAPIFHVNSDDPEAVMYVC K                                        | 2446.1661 | 2446.1783 | 3        | 110.0 | Q60597 | 2-oxoglutarate dehydrogenase, mitochondrial        |
| cLPTPK + Carbamidomethyl (C)                                   | 714.3734  | 714.3784  | 2        | 42.0  | P62717 | 60S ribosomal protein L18a                         |
| GAVTQCYSR                                                      | 896.4174  | 896.419   | 2        | 53.0  | P62717 | 60S ribosomal protein L18a                         |
| DLTTAGAVTQCYSR                                                 | 1397.6609 | 1397.6672 | 2        | 102.0 | P62717 | 60S ribosomal protein L18a                         |
| DLTTAGAVTQcYSR + Carbamidomethyl (C)                           | 1454.6824 | 1454.6981 | 2        | 89.0  | P62717 | 60S ribosomal protein L18a                         |
| HTSETADALCPR                                                   | 1299.5877 | 1299.5858 | 2        | 96.0  | Q8BIJ6 | Isoleucine--tRNA ligase, mitochondrial             |
| VHFVPGWDcHGLPIETK + Carbamidomethyl (C)                        | 1990.9724 | 1990.9842 | 3        | 70.0  | Q8BIJ6 | Isoleucine--tRNA ligase, mitochondrial             |
| ETVSEESNVCLSK                                                  | 1536.7341 | 1536.7467 | 2        | 98.0  | P58252 | Elongation factor 2                                |
| DLEEDHAcIPIKK + Carbamidomethyl (C)                            | 1566.7712 | 1566.7762 | 3        | 58.0  | P58252 | Elongation factor 2                                |
| SNTGGQAFPPQcVFDHWQILP GDPFDNSSRPSQVVAETR + Carbamidomethyl (C) | 4243.9771 | 4244.0494 | +3;+4    | 44.0  | P58252 | Elongation factor 2                                |
| QLPEGNICR                                                      | 1028.5073 | 1028.5061 | 2        | 58.0  | Q8R164 | Valacyclovir hydrolase                             |
| QLPEGNiCR + Carbamidomethyl (C)                                | 1085.5288 | 1085.5291 | 2        | 60.0  | Q8R164 | Valacyclovir hydrolase                             |
| HLLPLVQCPT                                                     | 1119.6111 | 1119.6201 | 2        | 32.0  | Q8R164 | Valacyclovir hydrolase                             |
| HLLPLVQCPTLIVHGEKDPLVP R                                       | 2573.4516 | 2573.4581 | +3;+4    | 65.0  | Q8R164 | Valacyclovir hydrolase                             |
| cKELGITALHIK + Carbamidomethyl (C)                             | 1381.7751 | 1381.7802 | +2;+3;+4 | 90.0  | P62264 | 40S ribosomal protein S14                          |
| GEVITTYcPANNEPIAR + Carbamidomethyl (C)                        | 1903.9098 | 1903.9219 | 2        | 118.0 | Q9DBF1 | Alpha-aminoadipic semialdehyde dehydrogenase       |



|                                                      |           |           |          |       |               |                                                                                                                   |
|------------------------------------------------------|-----------|-----------|----------|-------|---------------|-------------------------------------------------------------------------------------------------------------------|
| GSDcGIVNVNIPTSGAEIGGAF<br>GGEK + Carbamidomethyl (C) | 2505.1806 | 2505.2194 | +2;+3    | 163.0 | Q9DBF1        | Alpha-aminoadipic semialdehyde<br>dehydrogenase                                                                   |
| LIENTDAACK                                           | 1076.5172 | 1076.5147 | 2        | 95.0  | Q9DCM2        | Glutathione S-transferase kappa 1                                                                                 |
| LIENTDAACK +<br>Carbamidomethyl (C)                  | 1133.5387 | 1133.5456 | 2        | 84.0  | Q9DCM2        | Glutathione S-transferase kappa 1                                                                                 |
| TSLDLYANVIHCK                                        | 1475.7442 | 1475.7547 | +2;+3    | 90.0  | P70404        | Isocitrate dehydrogenase [NAD] subunit<br>gamma 1, mitochondrial                                                  |
| EVYTHFTcATDTK +<br>Carbamidomethyl (C)               | 1571.6926 | 1571.7055 | +2;+3    | 100.0 | Q9DC51        | Guanine nucleotide-binding protein G(k)<br>subunit alpha                                                          |
| LcLTGQWEAAQELQHR +<br>Carbamidomethyl (C)            | 1938.937  | 1938.9579 | +2;+3    | 124.0 | Q9DCU9        | 4-hydroxy-2-oxoglutarate aldolase,<br>mitochondrial                                                               |
| GAVEPCAQPR                                           | 1026.4917 | 1026.497  | 2        | 66.0  | Q9JIL4        | Na(+)/H(+) exchange regulatory cofactor<br>NHE-RF3                                                                |
| AATGEEVSAEDLGGADLHCR                                 | 1999.8905 | 1999.9104 | +2;+3    | 151.0 | Q3ULD5        | Methylcrotonoyl-CoA carboxylase beta<br>chain, mitochondrial                                                      |
| KPYcNAHYPK                                           | 1219.5808 | 1219.5816 | 3        | 60.0  | Q61792,Q9DC07 | LIM and SH3 domain protein 1,LIM zinc-<br>binding domain-containing Nebulette                                     |
| KPYcNAHYPK +<br>Carbamidomethyl (C)                  | 1276.6022 | 1276.6101 | +2;+3    | 63.0  | Q61792,Q9DC07 | LIM and SH3 domain protein 1,LIM zinc-<br>binding domain-containing Nebulette                                     |
| VNcLDKYWHK +<br>Carbamidomethyl (C)                  | 1361.655  | 1361.661  | 3        | 59.0  | Q61792,Q9DC07 | LIM and SH3 domain protein 1,LIM zinc-<br>binding domain-containing Nebulette                                     |
| YKPVcNQVECHPYLNQMK +<br>Carbamidomethyl (C)          | 2318.0646 | 2318.0721 | +2;+3;+4 | 75.0  | Q91WR5        | Aldo-keto reductase family 1 member<br>C21                                                                        |
| DVPLGAPLCIIVEK                                       | 1465.8214 | 1465.8373 | 2        | 89.0  | Q8BMF4        | Dihydropyridoxyllysine-residue<br>acetyltransferase component of pyruvate<br>dehydrogenase complex, mitochondrial |
| DVPVGSIICTVEKPDIEAFK                                 | 2400.261  | 2400.2645 | +2;+3    | 137.0 | Q8BMF4        | Dihydropyridoxyllysine-residue<br>acetyltransferase component of pyruvate<br>dehydrogenase complex, mitochondrial |

|                                                              |           |           |       |       |                                 |                                                                     |
|--------------------------------------------------------------|-----------|-----------|-------|-------|---------------------------------|---------------------------------------------------------------------|
| EVESVTPEHCIFASNTSALPINQ<br>IAAVSK                            | 3054.5332 | 3054.5713 | 3     | 122.0 | Q8BMS1                          | Trifunctional enzyme subunit alpha,<br>mitochondrial                |
| SLPADILYEDQQCLVFR                                            | 2008.9928 | 2009.0082 | 2     | 124.0 | Q9D0S9                          | Histidine triad nucleotide-binding protein<br>2, mitochondrial      |
| TGPcPQGPAPVVIYQQLR +<br>Carbamidomethyl (C)                  | 2109.0677 | 2109.0826 | 2     | 126.0 | Q91YR9                          | Prostaglandin reductase 1                                           |
| ALETcGGDLK                                                   | 1005.4801 | 1005.4838 | 2     | 68.0  | Q9CZR8                          | Elongation factor Ts, mitochondrial                                 |
| ALETcGGDLK +<br>Carbamidomethyl (C)                          | 1062.5016 | 1062.5059 | 2     | 90.0  | Q9CZR8                          | Elongation factor Ts, mitochondrial                                 |
| APDQDEIDCLPLAK                                               | 1583.7501 | 1583.7621 | 2     | 119.0 | P16675                          | Lysosomal protective protein                                        |
| cLQNHPEHM +<br>Carbamidomethyl (C)                           | 1164.4804 | 1164.4868 | +2;+3 | 60.0  | P13707                          | Glycerol-3-phosphate dehydrogenase<br>[NAD(+)], cytoplasmic         |
| ICDQISDAVLDAHLQQDPDAK                                        | 2294.0849 | 2294.0957 | 3     | 90.0  | Q3THS6                          | S-adenosylmethionine synthase isoform<br>type-2                     |
| IcDQISDAVLDAHLQQDPDAK<br>+ Carbamidomethyl (C)               | 2351.1063 | 2351.1167 | 3     | 134.0 | Q3THS6                          | S-adenosylmethionine synthase isoform<br>type-2                     |
| GAPcSDAAGHQVPYK +<br>Carbamidomethyl (C)                     | 1556.7042 | 1556.7132 | +2;+3 | 116.0 | Q8R242                          | Di-N-acetylchitobiase                                               |
| VPFRGAPCSDAAGHQVPYK                                          | 1998.9734 | 1998.9819 | 4     | 36.0  | Q8R242                          | Di-N-acetylchitobiase                                               |
| LLPNEDCAK                                                    | 1001.4852 | 1001.4857 | 2     | 59.0  | P15947,P00756                   | Kallikrein-1,Kallikrein 1-related peptidase<br>b3                   |
| LGSTcLASGWSITPVKYEYPD<br>ELQcVNLK + 2<br>Carbamidomethyl (C) | 3384.637  | 3452.6938 | 3     | 162.0 | P15947                          | Kallikrein-1                                                        |
| SACGVcPGR +<br>Carbamidomethyl (C)                           | 973.411   | 973.4144  | 2     | 63.0  | Q9D1R9                          | 60S ribosomal protein L34                                           |
| SACGVcPGR +<br>Carbamidomethyl (C)                           | 973.411   | 973.4195  | 2     | 65.0  | Q9D1R9                          | 60S ribosomal protein L34                                           |
| SACGVcPGR + 2<br>Carbamidomethyl (C)                         | 1030.4324 | 1030.4304 | 2     | 60.0  | Q9D1R9                          | 60S ribosomal protein L34                                           |
| VKELNNVCEPVVTQPKPK                                           | 2021.0979 | 2021.1057 | 3     | 84.0  | Q61699                          | Heat shock protein 105 kDa                                          |
| ELPPDQAEYCIAR                                                | 1503.7027 | 1503.7084 | 2     | 77.0  | Q7TPR4,P57780                   | Alpha-actinin-1,Alpha-actinin-4                                     |
| cQLEINFNTLQTK +<br>Carbamidomethyl (C)                       | 1607.7977 | 1607.8056 | 2     | 77.0  | Q7TPR4,O88990,<br>P57780,Q9JI91 | Alpha-actinin-1,Alpha-actinin-3,Alpha-<br>actinin-4,Alpha-actinin-2 |
| NcGQMSEIEAK +<br>Carbamidomethyl (C)                         | 1265.538  | 1265.5376 | 2     | 80.0  | P26039                          | Talin-1                                                             |
| AcEFAGFQcQIQFGPHNEQK +<br>2 Carbamidomethyl (C)              | 2463.0736 | 2463.0919 | 3     | 105.0 | P26039                          | Talin-1                                                             |
| MVAAATNNLcEAANAAVQGH<br>ASQEK + Carbamidomethyl<br>(C)       | 2555.1856 | 2555.2029 | 3     | 34.0  | P26039                          | Talin-1                                                             |
| cLAFHDISPQAPTHFLVIPK +<br>Carbamidomethyl (C)                | 2290.1933 | 2290.2011 | +3;+4 | 91.0  | P70349                          | Histidine triad nucleotide-binding protein<br>1                     |
| IIFEDDRcLAFHDISPQAPTHFL<br>VIPK + Carbamidomethyl (C)        | 3178.6274 | 3178.6705 | 3     | 49.0  | P70349                          | Histidine triad nucleotide-binding protein<br>1                     |

|                                                                |           |           |       |       |        |                                                      |
|----------------------------------------------------------------|-----------|-----------|-------|-------|--------|------------------------------------------------------|
| NTGIICTIGPASR                                                  | 1301.6762 | 1301.6858 | 2     | 74.0  | P52480 | Pyruvate kinase PKM                                  |
| AEGSDVANAVLDGADcIMLSG<br>ETAK + Carbamidomethyl (C)            | 2493.1363 | 2493.1384 | +2;+3 | 84.0  | P52480 | Pyruvate kinase PKM                                  |
| GIFPVLcKDAVLNAWAEDVDL<br>R + Carbamidomethyl (C)               | 2500.2784 | 2500.2807 | 3     | 114.0 | P52480 | Pyruvate kinase PKM                                  |
| STECAHPGVVEK                                                   | 1255.5867 | 1255.5885 | +2;+3 | 98.0  | O88575 | Sodium- and chloride-dependent<br>transporter XTRP3B |
| LFECsNKTGR                                                     | 1153.555  | 1153.5256 | 2     | 76.0  | O88398 | Advillin                                             |
| TLDCePK + Carbamidomethyl<br>(C)                               | 861.3902  | 861.3904  | 2     | 41.0  | P15105 | Glutamine synthetase                                 |
| cIEEAIDKLSK +<br>Carbamidomethyl (C)                           | 1304.6646 | 1304.6683 | 3     | 90.0  | P15105 | Glutamine synthetase                                 |
| RPSANcDPYAVTEAIVR +<br>Carbamidomethyl (C)                     | 1917.9367 | 1917.953  | 2     | 78.0  | P15105 | Glutamine synthetase                                 |
| VcNPIITK                                                       | 886.4946  | 886.4961  | 2     | 76.0  | P63017 | Heat shock cognate 71 kDa protein                    |
| GIScIVVEK +<br>Carbamidomethyl (C)                             | 1003.5372 | 1003.5423 | 2     | 71.0  | Q9D7B6 | Isobutyryl-CoA dehydrogenase,<br>mitochondrial       |
| cIDPSLGLNEEQKGFQK +<br>Carbamidomethyl (C)                     | 1961.9517 | 1961.9846 | +2;+3 | 112.0 | Q9D7B6 | Isobutyryl-CoA dehydrogenase,<br>mitochondrial       |
| GHTAcADAYLTPTIQR +<br>Carbamidomethyl (C)                      | 1773.8468 | 1773.8655 | 2     | 114.0 | Q8K010 | 5-oxoprolinase                                       |
| SGTGQQLGQAAEESNCCAR                                            | 1908.8054 | 1908.8188 | 2     | 113.0 | Q9JIZ9 | Phospholipid scramblase 3                            |
| CATITPDEAR                                                     | 1075.4968 | 1075.4954 | 2     | 75.0  | P54071 | Isocitrate dehydrogenase [NADP],<br>mitochondrial    |
| EECYTPR                                                        | 896.3698  | 896.3739  | 2     | 48.0  | Q8C3K6 | Sodium/glucose cotransporter 1                       |
| AYDLFCGLDQDKGPK                                                | 1668.7818 | 1668.7918 | +2;+3 | 110.0 | Q8C3K6 | Sodium/glucose cotransporter 1                       |
| TTPTGWTLDCIQGTGVDNPG<br>HPFIK                                  | 2725.317  | 2725.3252 | +2;+3 | 116.0 | P30275 | Creatine kinase U-type, mitochondrial                |
| KAAAPAPEEEMDEcEQALAAE<br>PK + Carbamidomethyl (C)              | 2484.1148 | 2484.1271 | +3;+4 | 119.0 | Q9D8N0 | Elongation factor 1-gamma                            |
| VcALGESK +<br>Carbamidomethyl (C)                              | 862.4218  | 862.4237  | 2     | 62.0  | O88342 | WD repeat-containing protein 1                       |
| cFSIDNPGYEPEVVAVHPGGD<br>TVAVGGTDGNVR +<br>Carbamidomethyl (C) | 3384.5681 | 3384.6094 | 3     | 109.0 | O88342 | WD repeat-containing protein 1                       |
| VILITPPPLCEAAWEK                                               | 1778.9641 | 1778.9729 | 2     | 76.0  | Q9DB29 | Isoamyl acetate-hydrolyzing esterase 1<br>homolog    |
| VILITPPPLCEAAWEK +<br>Carbamidomethyl (C)                      | 1835.9855 | 1835.998  | +2;+3 | 72.0  | Q9DB29 | Isoamyl acetate-hydrolyzing esterase 1<br>homolog    |
| VILITPPPLCEAAWEKCVLK +<br>Carbamidomethyl (C)                  | 2476.3109 | 2476.3352 | 3     | 30.0  | Q9DB29 | Isoamyl acetate-hydrolyzing esterase 1<br>homolog    |
| ALAGcDFLTISPK +<br>Carbamidomethyl (C)                         | 1391.7119 | 1391.7212 | 2     | 108.0 | Q93092 | Transaldolase                                        |

|                                                         |           |           |          |       |                      |                                                                                                            |
|---------------------------------------------------------|-----------|-----------|----------|-------|----------------------|------------------------------------------------------------------------------------------------------------|
| VNCLAPGLIK                                              | 1026.5896 | 1026.5963 | 2        | 76.0  | Q99LB2               | Dehydrogenase/reductase SDR family member 4                                                                |
| VNcLAPGLIK + Carbamidomethyl (C)                        | 1083.611  | 1083.6174 | 2        | 66.0  | Q99LB2               | Dehydrogenase/reductase SDR family member 4                                                                |
| LAGVTALScWLPLR + Carbamidomethyl (C)                    | 1555.8545 | 1555.8709 | 2        | 107.0 | P97823               | Acyl-protein thioesterase 1                                                                                |
| WVPEITHHCPK                                             | 1345.6601 | 1345.6602 | +2;+3;+4 | 66.0  | P60766               | Cell division control protein 42 homolog                                                                   |
| IPIPEEEYSCFSFR                                          | 1715.7865 | 1715.7895 | 2        | 105.0 | P49282               | Natural resistance-associated macrophage protein 2                                                         |
| LGAQAHPFVVDcSQR                                         | 1626.7937 | 1626.8064 | 3        | 79.0  | Q9EQ06               | Estradiol 17-beta-dehydrogenase 11                                                                         |
| LGAQAHPFVVDcSQREIYSAAK + Carbamidomethyl (C)            | 2575.2489 | 2575.2594 | +3;+4    | 42.0  | Q9EQ06               | Estradiol 17-beta-dehydrogenase 11                                                                         |
| TLNEADcATVPPAIR + Carbamidomethyl (C)                   | 1626.8035 | 1626.8145 | 2        | 111.0 | Q8K2B3               | Succinate dehydrogenase [ubiquinone] flavoprotein subunit, mitochondrial                                   |
| GcHLLVATPGR + Carbamidomethyl (C)                       | 1179.6183 | 1179.6225 | 3        | 63.0  | Q62167,Q62095,P16381 | ATP-dependent RNA helicase DDX3X,ATP-dependent RNA helicase DDX3Y,Putative ATP-dependent RNA helicase P110 |
| VRPCVVYGGAEIGQQIR                                       | 1843.9727 | 1843.9822 | 3        | 82.0  | Q62167               | ATP-dependent RNA helicase DDX3X                                                                           |
| DVRPITEQIAVTAGCK                                        | 1699.8927 | 1699.8999 | +2;+3    | 103.0 | Q91WU0               | Carboxylesterase 1F                                                                                        |
| ITFPGcFTNScCSHPLSNPGELEENNAIGVK + 2 Carbamidomethyl (C) | 3527.5796 | 3527.6005 | 3        | 101.0 | P58044               | Isopentenyl-diphosphate Delta-isomerase 1                                                                  |
| HPSKPDPSGECNPDLR                                        | 1747.7948 | 1747.7969 | 3        | 103.0 | Q60972               | Histone-binding protein RBBP4                                                                              |
| IYHPNINSNGSICLDILR                                      | 2041.0415 | 2041.059  | +2;+3    | 111.0 | P61080,P61079,P62838 | Ubiquitin-conjugating enzyme E2 D1,Ubiquitin-conjugating enzyme E2 D3,Ubiquitin-conjugating enzyme E2 D2   |
| GFHPQCLQR                                               | 1084.5236 | 1084.529  | +2;+3    | 55.0  | Q8BGD4               | Solute carrier organic anion transporter family member 4C1                                                 |
| GFHPQcLQR + Carbamidomethyl (C)                         | 1141.5451 | 1141.5497 | +2;+3    | 58.0  | Q8BGD4               | Solute carrier organic anion transporter family member 4C1                                                 |
| VASVAHSAPSEAPSCSPFGK                                    | 1927.9098 | 1927.9256 | 3        | 110.0 | P70290               | 55 kDa erythrocyte membrane protein                                                                        |
| QIQTFEAKPDDLLICTYPK                                     | 2222.1293 | 2222.1406 | +2;+3    | 85.0  | Q9D939               | Sulfotransferase 1C2                                                                                       |

|                                                          |           |           |          |       |                                 |                                                                                                    |
|----------------------------------------------------------|-----------|-----------|----------|-------|---------------------------------|----------------------------------------------------------------------------------------------------|
| TVAlcTcK + 2<br>Carbamidomethyl (C)                      | 1019.478  | 951.4513  | 2        | 52.0  | B1AR13                          | CDGSH iron-sulfur domain-containing protein 3, mitochondrial                                       |
| ATQRPPYcDGTHK +<br>Carbamidomethyl (C)                   | 1529.7045 | 1529.6982 | +2;+3;+4 | 66.0  | B1AR13                          | CDGSH iron-sulfur domain-containing protein 3, mitochondrial                                       |
| SKNQPFcDGSHFFQR +<br>Carbamidomethyl (C)                 | 1853.8268 | 1853.8342 | 3        | 60.0  | B1AR13                          | CDGSH iron-sulfur domain-containing protein 3, mitochondrial                                       |
| YVWLVEEQQLScDEPILSNK                                     | 2652.2781 | 2652.3109 | +2;+3    | 86.0  | P70296                          | Phosphatidylethanolamine-binding protein 1                                                         |
| YVWLVEEQQLScDEPILSNK<br>+ Carbamidomethyl (C)            | 2709.2996 | 2709.308  | 3        | 72.0  | P70296                          | Phosphatidylethanolamine-binding protein 1                                                         |
| SEGTycCGPVSVR +<br>Carbamidomethyl (C)                   | 1481.6279 | 1481.6336 | 2        | 74.0  | P21981                          | Protein-glutamine gamma-glutamyltransferase 2                                                      |
| HFCPNVPIILVGNKK                                          | 1677.9389 | 1677.952  | 3        | 66.0  | Q9QUI0,Q62159                   | Transforming protein RhoA,Rho-related GTP-binding protein RhoC                                     |
| ICYHHGDNDVPEER                                           | 1682.7107 | 1682.7172 | +2;+3;+4 | 79.0  | Q9D826                          | Peroxisomal sarcosine oxidase                                                                      |
| IcYHHGDNDVPEER +<br>Carbamidomethyl (C)                  | 1739.7322 | 1739.7446 | +2;+3;+4 | 109.0 | Q9D826                          | Peroxisomal sarcosine oxidase                                                                      |
| SCGSSTPDEFPTDIPGTK                                       | 1837.804  | 1837.8199 | 2        | 94.0  | Q9Z0N1                          | Eukaryotic translation initiation factor 2 subunit 3, X-linked                                     |
| YTcEASNGSGAR +<br>Carbamidomethyl (C)                    | 1271.5201 | 1271.5214 | 2        | 94.0  | Q6PDN3                          | Myosin light chain kinase, smooth muscle                                                           |
| THINIVVIGHVDSGK                                          | 1587.8733 | 1587.8914 | 3        | 92.0  | P10126,P62631                   | Elongation factor 1-alpha 1,Elongation factor 1-alpha 2                                            |
| KDGSASGTTLLEALDCILPPTRP<br>TDKPLR                        | 3064.6227 | 3064.6444 | +3;+4;+5 | 74.0  | P10126                          | Elongation factor 1-alpha 1                                                                        |
| DVSAPPPVSKPPAPTQPSQP<br>QIPCPAR                          | 2858.4749 | 2858.4896 | 3        | 58.0  | Q8BKZ9                          | Pyruvate dehydrogenase protein X component, mitochondrial                                          |
| DVSAPPPVSKPPAPTQPSQP<br>QIPcPAR + Carbamidomethyl<br>(C) | 2915.4964 | 2915.5195 | 3        | 62.0  | Q8BKZ9                          | Pyruvate dehydrogenase protein X component, mitochondrial                                          |
| QSPDGTcSLPSAR +<br>Carbamidomethyl (C)                   | 1374.6198 | 1374.6275 | 2        | 92.0  | Q8C129                          | Leucyl-cystinyl aminopeptidase                                                                     |
| FAQLcEEHGILR +<br>Carbamidomethyl (C)                    | 1471.7242 | 1471.7424 | +2;+3    | 99.0  | A2BIM8,B5X0G2,<br>P02762,P04938 | Major urinary protein 18,Major urinary protein 17,Major urinary protein 6,Major urinary protein 11 |
| FAKLcEEHGIR +<br>Carbamidomethyl (C)                     | 1471.7605 | 1471.7424 | +2;+3    | 99.0  | P04939                          | Major urinary protein 3                                                                            |

|                                                  |           |           |       |       |        |                                                         |
|--------------------------------------------------|-----------|-----------|-------|-------|--------|---------------------------------------------------------|
| FAKlcEEHGILR + Carbamidomethyl (C)               | 1471.7605 | 1471.7424 | +2;+3 | 99.0  | P11589 | Major urinary protein 2                                 |
| VVNTQcGYDVR + Carbamidomethyl (C)                | 1309.6085 | 1309.6067 | 2     | 104.0 | Q8QZY6 | Tetraspanin-14                                          |
| TSDFNtFLAQEGcTR + Carbamidomethyl (C)            | 1745.7679 | 1745.7839 | 2     | 94.0  | Q9D1P4 | Cysteine and histidine-rich domain-containing protein 1 |
| GDHYLCDVVWATEER                                  | 1791.7886 | 1791.7958 | +2;+3 | 96.0  | P28843 | Dipeptidyl peptidase 4                                  |
| KYPLLLDVYAGPCSQK                                 | 1793.9386 | 1793.9524 | +2;+3 | 55.0  | P28843 | Dipeptidyl peptidase 4                                  |
| KYPLLLDVYAGPCSQK + Carbamidomethyl (C)           | 1850.96   | 1850.9698 | 3     | 69.0  | P28843 | Dipeptidyl peptidase 4                                  |
| AcYGVLR + Carbamidomethyl (C)                    | 837.4167  | 837.4195  | 2     | 44.0  | P62908 | 40S ribosomal protein S3                                |
| GcEvvVSGK + Carbamidomethyl (C)                  | 933.459   | 933.4603  | 2     | 52.0  | P62908 | 40S ribosomal protein S3                                |
| GLcAIAQAESLR + Carbamidomethyl (C)               | 1287.6605 | 1287.6705 | 2     | 70.0  | P62908 | 40S ribosomal protein S3                                |
| RQcEEVAQALGK + Carbamidomethyl (C)               | 1387.6878 | 1387.6949 | 2     | 91.0  | Q9R0N0 | Galactokinase                                           |
| cPAQTAADFR + Carbamidomethyl (C)                 | 1135.508  | 1135.5053 | 2     | 96.0  | Q9QXD1 | Peroxisomal acyl-coenzyme A oxidase 2                   |
| SLAPAFESFCQGNRGPLPLGQSEAVK                       | 2815.4327 | 2815.4641 | 3     | 70.0  | Q8BH86 | UPF0317 protein C14orf159 homolog, mitochondrial        |
| SFPCFDEPNKK                                      | 1310.5965 | 1310.6022 | +2;+3 | 65.0  | P16406 | Glutamyl aminopeptidase                                 |
| SFPCFDEPNKK + Carbamidomethyl (C)                | 1367.618  | 1367.6205 | +2;+3 | 42.0  | P16406 | Glutamyl aminopeptidase                                 |
| SITIANQTncPLYVTK + Carbamidomethyl (C)           | 1821.9295 | 1821.9469 | 2     | 108.0 | O08553 | Dihydropyrimidinase-related protein 2                   |
| GYGcAGVSSVAYGLLTR + Carbamidomethyl (C)          | 1729.8458 | 1729.8678 | 2     | 112.0 | Q60759 | Glutaryl-CoA dehydrogenase, mitochondrial               |
| LSECEEQAK                                        | 1035.4542 | 1035.4533 | 2     | 65.0  | Q78PY7 | Staphylococcal nuclease domain-containing protein 1     |
| LSEcEEQAK + Carbamidomethyl (C)                  | 1092.4757 | 1092.4815 | 2     | 79.0  | Q78PY7 | Staphylococcal nuclease domain-containing protein 1     |
| AAGSLTDECR                                       | 1134.5339 | 1134.5431 | 2     | 88.0  | Q922B1 | O-acetyl-ADP-ribose deacetylase MACROD1                 |
| LVQMSIcSSLAR + Carbamidomethyl (C)               | 1363.6952 | 1363.6995 | +2;+3 | 46.0  | Q9Z0S1 | 3'(2'),5'-bisphosphate nucleotidase 1                   |
| QPcPSQYSAIKEEDLVVWVDPLDGTK + Carbamidomethyl (C) | 2973.443  | 2973.4735 | 3     | 97.0  | Q9Z0S1 | 3'(2'),5'-bisphosphate nucleotidase 1                   |
| IAQLcSR + Carbamidomethyl (C)                    | 846.4382  | 846.44    | 2     | 65.0  | Q9JLB4 | Cubilin                                                 |
| LIGTYcGTQR                                       | 1110.5492 | 1110.5523 | 2     | 34.0  | Q9JLB4 | Cubilin                                                 |
| LIGTYcGTQR + Carbamidomethyl (C)                 | 1167.5706 | 1167.5746 | 2     | 74.0  | Q9JLB4 | Cubilin                                                 |
| VAELNPDENcIR + Carbamidomethyl (C)               | 1428.6667 | 1428.6761 | 2     | 87.0  | Q9R112 | Sulfide:quinone oxidoreductase, mitochondrial           |
| IAVAQNcYK + Carbamidomethyl (C)                  | 1136.5648 | 1136.5669 | 2     | 86.0  | P17751 | Triosephosphate isomerase                               |

|                                                     |           |           |       |       |               |                                                             |
|-----------------------------------------------------|-----------|-----------|-------|-------|---------------|-------------------------------------------------------------|
| NINNDTTYCIK                                         | 1297.5972 | 1297.6031 | 2     | 68.0  | Q99KR3        | Endoribonuclease LACTB2                                     |
| VLGcNPGPMTLQGTNTYLVTGSR + Carbamidomethyl (C)       | 2492.2152 | 2492.2403 | 3     | 73.0  | Q99KR3        | Endoribonuclease LACTB2                                     |
| IAVHCTVR                                            | 897.4855  | 897.4922  | +2;+3 | 54.0  | Q9CXW4        | 60S ribosomal protein L11                                   |
| IAVHcTVR + Carbamidomethyl (C)                      | 954.5069  | 954.509   | +2;+3 | 68.0  | Q9CXW4        | 60S ribosomal protein L11                                   |
| QCVFPR                                              | 748.369   | 748.3755  | 2     | 50.0  | Q9CPR4        | 60S ribosomal protein L17                                   |
| SPcHIEMILTEK + Carbamidomethyl (C)                  | 1456.7054 | 1456.7136 | +2;+3 | 88.0  | Q9CPR4        | 60S ribosomal protein L17                                   |
| SSPcHIEMILTEK                                       | 1486.716  | 1486.7229 | +2;+3 | 75.0  | Q9CPR4        | 60S ribosomal protein L17                                   |
| SSPcHIEMILTEK + Carbamidomethyl (C)                 | 1543.7374 | 1543.6962 | +2;+3 | 56.0  | Q9CPR4        | 60S ribosomal protein L17                                   |
| SPPTVLVlcGPGNNGGDGLVCAR + Carbamidomethyl (C)       | 2320.1304 | 2320.1652 | 2     | 85.0  | Q8K4Z3        | NAD(P)H-hydrate epimerase                                   |
| TVVNISSLcALQPYKGWGLYcAGK + 2 Carbamidomethyl (C)    | 2752.3717 | 2752.4093 | 3     | 110.0 | Q64105        | Sepiapterin reductase                                       |
| ACQQAQVHANLK                                        | 1309.6561 | 1309.656  | 3     | 54.0  | Q8K0H1        | Multidrug and toxin extrusion protein 1                     |
| AcQQAQVHANLK + Carbamidomethyl (C)                  | 1366.6776 | 1366.6799 | +2;+3 | 61.0  | Q8K0H1        | Multidrug and toxin extrusion protein 1                     |
| ELNIICK                                             | 831.4524  | 831.4537  | 2     | 44.0  | Q8R086        | Sulfite oxidase, mitochondrial                              |
| LcDVLAQAGHR + Carbamidomethyl (C)                   | 1238.619  | 1238.6256 | +2;+3 | 80.0  | Q8R086        | Sulfite oxidase, mitochondrial                              |
| cREVAENCK + Carbamidomethyl (C)                     | 1175.5063 | 1175.5109 | 2     | 50.0  | Q9D6R2        | Isocitrate dehydrogenase [NAD] subunit alpha, mitochondrial |
| cLTQQAVALQR + Carbamidomethyl (C)                   | 1286.6765 | 1286.675  | 2     | 83.0  | Q5SW19        | Clustered mitochondria protein homolog                      |
| cHAGHLNGVYHQGGTYSK + Carbamidomethyl (C)            | 1984.8962 | 1984.9067 | +3;+4 | 86.0  | Q8VCM7        | Fibrinogen gamma chain                                      |
| LGYAGNTEPQFIIPSCIAIK                                | 2134.1132 | 2134.1444 | 2     | 74.0  | Q99JY9        | Actin-related protein 3                                     |
| TLTGTVIDSGDGVTHVIPVAEGYVIGSCIK                      | 3000.5478 | 3000.5347 | 3     | 34.0  | Q99JY9        | Actin-related protein 3                                     |
| cLSSLKEER + Carbamidomethyl (C)                     | 1120.5546 | 1120.5572 | +2;+3 | 68.0  | Q9DCD0        | 6-phosphogluconate dehydrogenase, decarboxylating           |
| cEGINISGNFYR + Carbamidomethyl (C)                  | 1428.6456 | 1428.6482 | 2     | 96.0  | P19253        | 60S ribosomal protein L13a                                  |
| LIPDGCQVVK                                          | 900.4739  | 900.4808  | 2     | 68.0  | Q6ZWW3,P86048 | 60S ribosomal protein L10,60S ribosomal protein L10-like    |
| MLScAGADR + Carbamidomethyl (C)                     | 979.4215  | 979.4217  | 2     | 55.0  | Q6ZWW3,P86048 | 60S ribosomal protein L10,60S ribosomal protein L10-like    |
| AKVDEFPLcGHMVSDEYEQLSSEALEAAR + Carbamidomethyl (C) | 3280.5016 | 3280.5097 | 3     | 131.0 | Q6ZWW3,P86048 | 60S ribosomal protein L10,60S ribosomal protein L10-like    |
| SGEGCVITR                                           | 920.4386  | 920.4423  | 2     | 81.0  | Q9WV54        | Acid ceramidase                                             |
| TPcYAQIR + Carbamidomethyl (C)                      | 1007.4858 | 1007.4823 | 2     | 31.0  | Q6NSQ9        | Glucose-6-phosphatase 3                                     |

|                                                                    |           |           |       |       |        |                                                          |
|--------------------------------------------------------------------|-----------|-----------|-------|-------|--------|----------------------------------------------------------|
| LQAQQDAVNIVcHSK + Carbamidomethyl (C)                              | 1709.8519 | 1709.8623 | 3     | 81.0  | O35226 | 26S proteasome non-ATPase regulatory subunit 4           |
| YLAEVAcGDDR + Carbamidomethyl (C)                                  | 1267.5503 | 1267.5571 | 2     | 81.0  | P68254 | 14-3-3 protein theta                                     |
| ILCFHGPPGVGK                                                       | 1223.6485 | 1223.6558 | 3     | 80.0  | Q8CGK3 | Lon protease homolog, mitochondrial                      |
| VTYDSDATSSAcR + Carbamidomethyl (C)                                | 1431.5936 | 1431.5993 | 2     | 116.0 | O89013 | Leptin receptor gene-related protein                     |
| LccLEK + 2 Carbamidomethyl (C)                                     | 889.4037  | 889.4085  | 2     | 35.0  | P70441 | Na(+)/H(+) exchange regulatory cofactor NHE-RF1          |
| LccLEKGPNGYGFHLHGEK + 2 Carbamidomethyl (C)                        | 2283.0565 | 2283.0716 | 3     | 80.0  | P70441 | Na(+)/H(+) exchange regulatory cofactor NHE-RF1          |
| GcEVTDPVNISSGQK + Carbamidomethyl (C)                              | 1502.7035 | 1502.7145 | 2     | 87.0  | Q8CIB5 | Fermitin family homolog 2                                |
| FLLADNLYCK                                                         | 1198.6056 | 1198.6081 | 2     | 79.0  | P61759 | Prefoldin subunit 3                                      |
| QcEGITSPGSK + Carbamidomethyl (C)                                  | 1291.5714 | 1291.57   | 2     | 79.0  | Q8BVQ5 | Protein phosphatase methylesterase 1                     |
| AIQDAGcQVLK + Carbamidomethyl (C)                                  | 1201.6125 | 1201.6212 | 2     | 87.0  | P40936 | Indolethylamine N-methyltransferase                      |
| DVFSCNVGNLQPGAK                                                    | 1547.7402 | 1547.7445 | 2     | 118.0 | Q99KC8 | von Willebrand factor A domain-containing protein 5A     |
| AHSEYEEALSQGHQAYLLEED<br>DYSRDVfScNVGNLQPGAK + Carbamidomethyl (C) | 4526.0357 | 4526.0772 | 5     | 31.0  | Q99KC8 | von Willebrand factor A domain-containing protein 5A     |
| FSFQCPGR                                                           | 940.4225  | 940.428   | 2     | 56.0  | O55222 | Integrin-linked protein kinase                           |
| FSFQcPGR + Carbamidomethyl (C)                                     | 997.444   | 997.449   | 2     | 53.0  | O55222 | Integrin-linked protein kinase                           |
| DFNEECPR                                                           | 1008.3971 | 1008.3982 | 2     | 56.0  | O55222 | Integrin-linked protein kinase                           |
| AIVICPTDEDLKDR                                                     | 1586.7974 | 1586.803  | +2;+3 | 82.0  | Q8VDM6 | Heterogeneous nuclear ribonucleoprotein U-like protein 1 |
| VFPLScVVQYAWGK + Carbamidomethyl (C)                               | 1780.8971 | 1780.9055 | 2     | 112.0 | Q924M7 | Mannose-6-phosphate isomerase                            |
| VVDDTAcPLLR + Carbamidomethyl (C)                                  | 1257.6387 | 1257.6466 | 2     | 94.0  | Q8BY89 | Choline transporter-like protein 2                       |
| ScALSNVK + Carbamidomethyl (C)                                     | 877.4327  | 877.4323  | 2     | 56.0  | Q8R0Y6 | Cytosolic 10-formyltetrahydrofolate dehydrogenase        |
| ScALSNVKK + Carbamidomethyl (C)                                    | 1005.5277 | 1005.5302 | +2;+3 | 52.0  | Q8R0Y6 | Cytosolic 10-formyltetrahydrofolate dehydrogenase        |
| SEVPGIFcAGADLK                                                     | 1405.6911 | 1405.7019 | 2     | 73.0  | Q9JLZ3 | Methylglutaconyl-CoA hydratase, mitochondrial            |
| SEVPGIFcAGADLK + Carbamidomethyl (C)                               | 1462.7126 | 1462.7243 | 2     | 93.0  | Q9JLZ3 | Methylglutaconyl-CoA hydratase, mitochondrial            |



|                                              |           |           |       |       |               |                                                                 |
|----------------------------------------------|-----------|-----------|-------|-------|---------------|-----------------------------------------------------------------|
| cILLSNLSNTSHAPK + Carbamidomethyl (C)        | 1653.8508 | 1653.8614 | +2;+3 | 111.0 | P19096        | Fatty acid synthase                                             |
| GDFCIQVGR                                    | 993.4702  | 993.4717  | 2     | 64.0  | P15532,Q01768 | Nucleoside diphosphate kinase A,Nucleoside diphosphate kinase B |
| GDFcIQVGR + Carbamidomethyl (C)              | 1050.4917 | 1050.5023 | 2     | 59.0  | P15532,Q01768 | Nucleoside diphosphate kinase A,Nucleoside diphosphate kinase B |
| SCTVEAVR                                     | 863.4171  | 863.4213  | 2     | 63.0  | Q9DC50        | Peroxisomal carnitine O-octanoyltransferase                     |
| TESEGHcPTHIAVLcR + 2 Carbamidomethyl (C)     | 1933.8775 | 1933.8731 | 3     | 70.0  | Q9DC50        | Peroxisomal carnitine O-octanoyltransferase                     |
| GLLLScIEDKNPcIFFEPK + 2 Carbamidomethyl (C)  | 2347.1592 | 2347.1706 | 3     | 79.0  | Q6P3A8        | 2-oxoisovalerate dehydrogenase subunit beta, mitochondrial      |
| SGGGGGSSGAGGGPScGTSSSR + Carbamidomethyl (C) | 1782.7188 | 1782.7282 | 2     | 74.0  | Q9CYN2        | Signal peptidase complex subunit 2                              |
| cGGAGFIPESSR + Carbamidomethyl (C)           | 1236.5557 | 1236.573  | 2     | 74.0  | Q99JY3        | GTPase IMAP family member 4                                     |
| SCAHDWVYE                                    | 1108.4284 | 1108.4298 | 2     | 35.0  | Q01768        | Nucleoside diphosphate kinase B                                 |
| NVVHLCK                                      | 811.4374  | 811.4393  | 2     | 33.0  | Q80W22        | Threonine synthase-like 2                                       |
| MGLPICLVAVNRNDIIHR                           | 2132.1711 | 2132.1666 | 4     | 89.0  | Q80W22        | Threonine synthase-like 2                                       |
| SAVEKGEELScEER + Carbamidomethyl (C)         | 1621.7253 | 1621.7243 | 3     | 73.0  | O70456        | 14-3-3 protein sigma                                            |
| DVGAETLLHScK + Carbamidomethyl (C)           | 1328.6394 | 1328.6459 | +2;+3 | 89.0  | Q9D1A2        | Cytosolic non-specific dipeptidase                              |
| DVGAETLLHSCKK                                | 1399.7129 | 1399.7199 | 3     | 60.0  | Q9D1A2        | Cytosolic non-specific dipeptidase                              |
| GSSDFCVK                                     | 841.364   | 841.3658  | 2     | 52.0  | Q68FL4        | Putative adenosylhomocysteinase 3                               |
| QKFDNLYcCR + Carbamidomethyl (C)             | 1413.6169 | 1413.6237 | 3     | 57.0  | Q68FL4        | Putative adenosylhomocysteinase 3                               |
| LTEGcSFRR + Carbamidomethyl (C)              | 1124.5397 | 1124.5473 | +2;+3 | 33.0  | Q6ZWU9,Q6ZWY3 | 40S ribosomal protein S27,40S ribosomal protein S27-like        |
| GVLFYGPPEGCGK                                | 1193.5903 | 1193.601  | 2     | 67.0  | Q01853        | Transitional endoplasmic reticulum ATPase                       |
| LADDVDLEQVANETHGHVGA<br>DLAALCSEAALQAIR      | 3614.7635 | 3614.7874 | +3;+4 | 92.0  | Q01853        | Transitional endoplasmic reticulum ATPase                       |
| DCPLNTEAASNK                                 | 1261.5608 | 1261.5603 | 2     | 85.0  | O35643        | AP-1 complex subunit beta-1                                     |
| cSSGPVPNEK + Carbamidomethyl (C)             | 1073.4812 | 1073.482  | 2     | 71.0  | Q8K0D5        | Elongation factor G, mitochondrial                              |

|                                                        |           |           |       |      |               |                                                                                                                              |
|--------------------------------------------------------|-----------|-----------|-------|------|---------------|------------------------------------------------------------------------------------------------------------------------------|
| ILAFPCNQFGR                                            | 1264.6387 | 1264.6424 | 2     | 85.0 | O70325,Q91XR9 | Phospholipid hydroperoxide glutathione peroxidase, mitochondrial, Phospholipid hydroperoxide glutathione peroxidase, nuclear |
| VAcQGEVVR + Carbamidomethyl (C)                        | 1016.5073 | 1016.5085 | 2     | 71.0 | Q8CGC7        | Bifunctional glutamate/proline--tRNA ligase                                                                                  |
| NSEYVAEPIQAYIIPSGDAHQSE YIAPCDcR + Carbamidomethyl (C) | 3563.5973 | 3563.6299 | 3     | 71.0 | Q6P1B1        | Xaa-Pro aminopeptidase 1                                                                                                     |
| YIDCDLNR                                               | 1010.4491 | 1010.4544 | 2     | 68.0 | Q8R3P0        | Aspartoacylase                                                                                                               |
| VFVLPcIQIQQR                                           | 1442.8068 | 1442.815  | +2;+3 | 97.0 | O08917        | Flotillin-1                                                                                                                  |
| VFVLPcIQIQQR + Carbamidomethyl (C)                     | 1499.8283 | 1499.8306 | 2     | 75.0 | O08917        | Flotillin-1                                                                                                                  |
| STWVILHHK                                              | 1119.6189 | 1119.6179 | 3     | 38.0 | P56395        | Cytochrome b5                                                                                                                |
| STWVILHHKVYDLTK                                        | 1839.0043 | 1839.0071 | 3     | 74.0 | P56395        | Cytochrome b5                                                                                                                |
| MGVPYCIK                                               | 1022.5293 | 1022.5332 | 2     | 70.0 | P12970        | 60S ribosomal protein L7a                                                                                                    |
| cSTPEEIK + Carbamidomethyl (C)                         | 962.4379  | 962.4394  | 2     | 55.0 | Q9R0P5        | Dextrin                                                                                                                      |
| KCSTPEEIK                                              | 1033.5114 | 1033.5055 | 2     | 60.0 | Q9R0P5        | Dextrin                                                                                                                      |
| cSTPEEIKK + Carbamidomethyl (C)                        | 1090.5328 | 1090.5305 | +2;+3 | 58.0 | Q9R0P5        | Dextrin                                                                                                                      |
| GLCFPLVK                                               | 875.4939  | 875.4982  | 2     | 47.0 | Q91ZN5        | Adenosine 3'-phospho 5'-phosphosulfate transporter 1                                                                         |
| GLcFPLVK + Carbamidomethyl (C)                         | 932.5154  | 932.5171  | 2     | 51.0 | Q91ZN5        | Adenosine 3'-phospho 5'-phosphosulfate transporter 1                                                                         |
| AcVFGNEPK + Carbamidomethyl (C)                        | 1020.4699 | 1020.4723 | 2     | 54.0 | Q91ZN5        | Adenosine 3'-phospho 5'-phosphosulfate transporter 1                                                                         |
| AYHGcSPYTLGLTNVGIYK + Carbamidomethyl (C)              | 2113.0303 | 2113.0276 | 3     | 68.0 | Q3UEG6        | Alanine--glyoxylate aminotransferase 2, mitochondrial                                                                        |
| HPLPDSAScFQQLR + Carbamidomethyl (C)                   | 1870.8632 | 1870.8736 | 3     | 68.0 | Q8R3L5        | Solute carrier organic anion transporter family member 3A1                                                                   |
| NAGQTcVcSNR + 2 Carbamidomethyl (C)                    | 1333.5503 | 1333.5725 | 2     | 71.0 | Q8BWF0        | Succinate-semialdehyde dehydrogenase, mitochondrial                                                                          |
| ILATSFICTLPAGHR                                        | 1598.8603 | 1598.8609 | 3     | 79.0 | Q68FL6        | Methionine--tRNA ligase, cytoplasmic                                                                                         |
| NKEWRPQDAEPcAHPNSR + Carbamidomethyl (C)               | 2190.9977 | 2191.0155 | 3     | 72.0 | Q9Z2V4        | Phosphoenolpyruvate carboxykinase, cytosolic [GTP]                                                                           |
| MIPCDFLIPVQTQHPIRK                                     | 2135.1384 | 2135.1388 | +3;+4 | 75.0 | P06745        | Glucose-6-phosphate isomerase                                                                                                |
| SGPYcSESIR + Carbamidomethyl (C)                       | 1154.5026 | 1154.5107 | 2     | 70.0 | Q7TMR0        | Lysosomal Pro-X carboxypeptidase                                                                                             |
| VCADLIR                                                | 788.4214  | 788.4288  | 2     | 57.0 | P60867        | 40S ribosomal protein S20                                                                                                    |
| LEcVEPNCR + Carbamidomethyl (C)                        | 1186.5111 | 1186.5137 | 2     | 47.0 | P83882        | 60S ribosomal protein L36a                                                                                                   |

|                                         |           |           |          |       |               |                                                                           |
|-----------------------------------------|-----------|-----------|----------|-------|---------------|---------------------------------------------------------------------------|
| NcPHIVVGTGR + Carbamidomethyl (C)       | 1305.6612 | 1305.6667 | +2;+3    | 72.0  | Q9Z1N5        | Spliceosome RNA helicase Ddx39b                                           |
| VTAVIPcFPYAR + Carbamidomethyl (C)      | 1392.7224 | 1392.7392 | 2        | 72.0  | Q9D7G0,Q9CS42 | Ribose-phosphate pyrophosphokinase 1,Ribose-phosphate pyrophosphokinase 2 |
| INMcGLTTK + Carbamidomethyl (C)         | 1036.5045 | 1036.5103 | 2        | 65.0  | P05201        | Aspartate aminotransferase, cytoplasmic                                   |
| NLETPSCK                                | 890.4167  | 890.4189  | 2        | 54.0  | Q9WTP6        | Adenylate kinase 2, mitochondrial                                         |
| NLETPScK + Carbamidomethyl (C)          | 947.4382  | 947.4397  | 2        | 49.0  | Q9WTP6        | Adenylate kinase 2, mitochondrial                                         |
| NLETPScKNGFLLDGFP + Carbamidomethyl (C) | 2064.0099 | 2064.0187 | 3        | 38.0  | Q9WTP6        | Adenylate kinase 2, mitochondrial                                         |
| LACGIAR                                 | 815.4687  | 815.4727  | 2        | 73.0  | Q9WU84        | Copper chaperone for superoxide dismutase                                 |
| VTDKLPIHDHIFCcr + Carbamidomethyl (C)   | 1953.9553 | 1953.9691 | +3;+4    | 64.0  | Q60692        | Proteasome subunit beta type-6                                            |
| TNGFSLESCR                              | 1112.4921 | 1112.4986 | 2        | 64.0  | O35350        | Calpain-1 catalytic subunit                                               |
| CGVISPR                                 | 730.3796  | 730.3853  | 2        | 68.0  | P62245        | 40S ribosomal protein S15a                                                |
| EHRPPcAQEAPR + Carbamidomethyl (C)      | 1446.6786 | 1446.6777 | 3        | 58.0  | Q64337        | Sequestosome-1                                                            |
| REHRPPcAQEAPR + Carbamidomethyl (C)     | 1602.7797 | 1602.7761 | 4        | 33.0  | Q64337        | Sequestosome-1                                                            |
| ATLCYARPEPR                             | 1275.6394 | 1275.639  | +2;+3    | 58.0  | Q60825        | Sodium-dependent phosphate transport protein 2A                           |
| GVTIIGPATVGGIKPGCFK                     | 1814.0125 | 1814.0229 | 3        | 62.0  | Q91V92        | ATP-citrate synthase                                                      |
| SETVLTCSENGR                            | 1165.5397 | 1165.5446 | 2        | 63.0  | Q62470        | Integrin alpha-3                                                          |
| HQADAcHAYQIHR + Carbamidomethyl (C)     | 1718.8059 | 1718.8143 | +2;+3;+4 | 100.0 | O89017        | Legumain                                                                  |
| VTGTQFPEALPVPCNPNDVS HGYVTVKPGIR        | 3388.7238 | 3388.7586 | +3;+4    | 67.0  | P34914        | Bifunctional epoxide hydrolase 2                                          |
| TFQDCYSSK                               | 1077.4437 | 1077.443  | 2        | 62.0  | Q8BH95        | Enoyl-CoA hydratase, mitochondrial                                        |
| ISFVDCSK                                | 897.4266  | 897.4339  | 2        | 66.0  | Q8VCN5        | Cystathionine gamma-lyase                                                 |
| TEIQVNCPK                               | 1030.5117 | 1030.5148 | 2        | 59.0  | O09117        | Synaptophysin-like protein 1                                              |
| ALSALCDPSR                              | 1031.507  | 1031.5108 | 2        | 76.0  | Q9DC37        | Major facilitator superfamily domain-containing protein 1                 |
| cTWQLGR + Carbamidomethyl (C)           | 919.4334  | 919.4388  | 2        | 43.0  | Q91WT9        | Cystathionine beta-synthase                                               |
| cEFFNAGGSVK + Carbamidomethyl (C)       | 1214.539  | 1214.5451 | 2        | 55.0  | Q91WT9        | Cystathionine beta-synthase                                               |
| NNTQVLINCR                              | 1173.5924 | 1173.5939 | 2        | 78.0  | P62317        | Small nuclear ribonucleoprotein Sm D2                                     |
| ILALcMGNHELYMR + Carbamidomethyl (C)    | 1719.8259 | 1719.8324 | +2;+3    | 138.0 | P26043,P26041 | Radixin,Moesin                                                            |
| QVcPLDNR + Carbamidomethyl (C)          | 1000.476  | 1000.484  | 2        | 64.0  | P62878        | E3 ubiquitin-protein ligase RBX1                                          |

|                                               |           |           |       |      |               |                                                                 |
|-----------------------------------------------|-----------|-----------|-------|------|---------------|-----------------------------------------------------------------|
| NLADCLR                                       | 803.3959  | 803.4038  | 2     | 56.0 | Q9R1P3        | Proteasome subunit beta type-2                                  |
| RNLADCLR                                      | 959.4971  | 959.5045  | 2     | 55.0 | Q9R1P3        | Proteasome subunit beta type-2                                  |
| LFAcSNR + Carbamidomethyl (C)                 | 866.4069  | 866.4095  | 2     | 45.0 | P13020        | Gelsolin                                                        |
| GALVTVGQLScYDQAK + Carbamidomethyl (C)        | 1708.8454 | 1708.8542 | 2     | 89.0 | Q9QZD8        | Mitochondrial dicarboxylate carrier                             |
| IcIVTK + Carbamidomethyl (C)                  | 732.4204  | 732.4218  | 2     | 42.0 | O09061        | Proteasome subunit beta type-1                                  |
| LTDKTVIGcSGFHGDcLTLTK + 2 Carbamidomethyl (C) | 2390.1611 | 2390.1744 | +3;+4 | 53.0 | O09061        | Proteasome subunit beta type-1                                  |
| YNPNVLPVQCTGKR                                | 1587.8191 | 1587.8361 | +2;+3 | 73.0 | P14094        | Sodium/potassium-transporting ATPase subunit beta-1             |
| VLScPR + Carbamidomethyl (C)                  | 730.3796  | 730.3805  | 2     | 49.0 | Q922Q1,Q9QX96 | Mitochondrial amidoxime reducing component 2,Sal-like protein 2 |
| LCDPSVK                                       | 760.3789  | 760.3778  | 2     | 53.0 | Q922Q1        | Mitochondrial amidoxime reducing component 2                    |
| cNSLEEIK + Carbamidomethyl (C)                | 991.4644  | 991.4667  | 2     | 56.0 | P16546        | Spectrin alpha chain, non-erythrocytic 1                        |
| NKGVVLGGcGDK + Carbamidomethyl (C)            | 1202.6078 | 1202.6105 | +2;+3 | 68.0 | P61922        | 4-aminobutyrate aminotransferase, mitochondrial                 |
| cQYLQAEK + Carbamidomethyl (C)                | 1038.4804 | 1038.4825 | 2     | 56.0 | Q8VDD5        | Myosin-9                                                        |
| RKPcDNGDPYVIALR + Carbamidomethyl (C)         | 1772.8992 | 1772.9016 | 3     | 77.0 | Q8VHQ9        | Acyl-coenzyme A thioesterase 11                                 |
| YcTQDAFFQIK + Carbamidomethyl (C)             | 1419.6493 | 1419.6606 | 2     | 62.0 | O35459        | Delta(3,5)-Delta(2,4)-dienoyl-CoA isomerase, mitochondrial      |
| cALSSVDIYR + Carbamidomethyl (C)              | 1182.5703 | 1182.577  | 2     | 56.0 | Q91VH6        | Protein MEMO1                                                   |
| cSEAFVR + Carbamidomethyl (C)                 | 867.3909  | 867.3934  | 2     | 56.0 | P52825        | Carnitine O-palmitoyltransferase 2, mitochondrial               |
| QVEALLPCLR                                    | 1269.6751 | 1269.6807 | 2     | 81.0 | Q8CG76        | Aflatoxin B1 aldehyde reductase member 2                        |
| AKGPVcLLAGGEPTVQLQSGSK + Carbamidomethyl (C)  | 2166.1467 | 2166.1623 | 3     | 79.0 | Q8QZY2        | Glycerate kinase                                                |
| EFVDATNLTPR                                   | 1261.6303 | 1261.6354 | 2     | 52.0 | P20060        | Beta-hexosaminidase subunit beta                                |
| QLVIGGEAcLWGEFVDATNLTPR + Carbamidomethyl (C) | 2545.2635 | 2545.3157 | 3     | 40.0 | P20060        | Beta-hexosaminidase subunit beta                                |
| AGcECLNESDEHGFDNcLR + 2 Carbamidomethyl (C)   | 2360.9096 | 2360.9249 | 3     | 54.0 | Q8CDN6        | Thioredoxin-like protein 1                                      |
| TLLSNCK                                       | 777.4055  | 777.4091  | 2     | 54.0 | Q6PB66        | Leucine-rich PPR motif-containing protein, mitochondrial        |

|                                              |           |           |       |       |               |                                                                       |
|----------------------------------------------|-----------|-----------|-------|-------|---------------|-----------------------------------------------------------------------|
| AcGNFGIPcELR + 2 Carbamidomethyl (C)         | 1460.6541 | 1460.6626 | 2     | 54.0  | Q9DCL9        | Multifunctional protein ADE2                                          |
| cVHAISTDSPDLEPVLK + Carbamidomethyl (C)      | 1879.935  | 1879.9529 | 3     | 65.0  | O08677        | Kininogen-1                                                           |
| SVLSVCFPGcVLTNGEAEQQRK + Carbamidomethyl (C) | 2489.2043 | 2489.2169 | 3     | 54.0  | P27601        | Guanine nucleotide-binding protein subunit alpha-13                   |
| TQLAVCQQR                                    | 1045.5339 | 1045.5349 | 2     | 54.0  | P30416        | Peptidyl-prolyl cis-trans isomerase FKBP4                             |
| IIIKNDPSLPEPACVK                             | 1735.9542 | 1735.9521 | 3     | 54.0  | Q8BP47        | Asparagine--tRNA ligase, cytoplasmic                                  |
| YNPTWHCIVGR                                  | 1344.6397 | 1344.6473 | 3     | 54.0  | Q9D0M5,P63168 | Dynein light chain 2, cytoplasmic,Dynein light chain 1, cytoplasmic   |
| SPCYDR                                       | 852.38    | 852.384   | 2     | 54.0  | P47740        | Fatty aldehyde dehydrogenase                                          |
| SSAIPSPCGK                                   | 945.459   | 945.4564  | 2     | 67.0  | P50544        | Very long-chain specific acyl-CoA dehydrogenase, mitochondrial        |
| SSAIPSPcGK + Carbamidomethyl (C)             | 1002.4804 | 1002.4877 | 2     | 57.0  | P50544        | Very long-chain specific acyl-CoA dehydrogenase, mitochondrial        |
| FACFER                                       | 771.3374  | 771.3382  | 2     | 58.0  | Q8VEM8        | Phosphate carrier protein, mitochondrial                              |
| AECSAEQcYK + Carbamidomethyl (C)             | 1255.4849 | 1255.4947 | 2     | 76.0  | P06801        | NADP-dependent malic enzyme                                           |
| cEELSSLHGQLK + Carbamidomethyl (C)           | 1399.6765 | 1399.6959 | +2;+3 | 88.0  | Q99PL5        | Ribosome-binding protein 1                                            |
| LWcTFHDK + Carbamidomethyl (C)               | 1105.5015 | 1105.5071 | 3     | 50.0  | P45376        | Aldose reductase                                                      |
| YKPAVNQIEcHPYLtQEK + Carbamidomethyl (C)     | 2217.0888 | 2217.0995 | +3;+4 | 67.0  | P45376        | Aldose reductase                                                      |
| ALRLPQTATCK                                  | 1200.6649 | 1200.6714 | 3     | 52.0  | P04186        | Complement factor B                                                   |
| NLSGQPNFPCR                                  | 1231.5768 | 1231.5825 | 2     | 52.0  | Q9ET30        | Transmembrane 9 superfamily member 3                                  |
| GAQEVFNELPCEYVEPHELK                         | 2358.095  | 2358.118  | +2;+3 | 134.0 | Q99K67        | Alpha-amino adipic semialdehyde synthase, mitochondrial               |
| FcINSVALK + Carbamidomethyl (C)              | 1050.5532 | 1050.5606 | 2     | 51.0  | Q78J03        | Methionine-R-sulfoxide reductase B2, mitochondrial                    |
| cLGIPAR + Carbamidomethyl (C)                | 785.4218  | 785.4298  | 2     | 54.0  | P49222,Q8BH61 | Erythrocyte membrane protein band 4.2,Coagulation factor XIII A chain |
| cFNDFIK + Carbamidomethyl (C)                | 942.4269  | 942.4318  | 2     | 54.0  | Q9QXW9        | Large neutral amino acids transporter small subunit 2                 |
| cDVLRN + Carbamidomethyl (C)                 | 775.3647  | 775.3685  | 2     | 55.0  | Q9DC04        | Regulator of G-protein signaling 3                                    |

|                                                             |           |           |       |       |                          |                                                                                         |
|-------------------------------------------------------------|-----------|-----------|-------|-------|--------------------------|-----------------------------------------------------------------------------------------|
| ASFQPPVCNK                                                  | 1089.5277 | 1089.5323 | 2     | 37.0  | Q78JT3                   | 3-hydroxyanthranilate 3,4-dioxygenase                                                   |
| VTMGGQcIAlAPDDSLlVPAG<br>TSYVWER +<br>Carbamidomethyl (C)   | 3005.4627 | 3005.4856 | 3     | 43.0  | Q78JT3                   | 3-hydroxyanthranilate 3,4-dioxygenase                                                   |
| GGKlcLTDHFkPLWAR +<br>Carbamidomethyl (C)                   | 1897.9985 | 1898.0113 | 4     | 50.0  | Q9CR09                   | Ubiquitin-fold modifier-conjugating<br>enzyme 1                                         |
| GHTEIIVPQLTESYNShRPPE<br>EEIPFcTLK +<br>Carbamidomethyl (C) | 3635.7566 | 3635.7813 | +3;+4 | 48.0  | Q8C7R4                   | Ubiquitin-like modifier-activating enzyme<br>6                                          |
| GYSIPEcQK                                                   | 1023.4695 | 1023.4729 | 2     | 50.0  | Q9CZU6                   | Citrate synthase, mitochondrial                                                         |
| GYSIPEcQK +<br>Carbamidomethyl (C)                          | 1080.491  | 1080.4938 | 2     | 34.0  | Q9CZU6                   | Citrate synthase, mitochondrial                                                         |
| FRGYSIPEcQK +<br>Carbamidomethyl (C)                        | 1383.6605 | 1383.673  | +2;+3 | 47.0  | Q9CZU6                   | Citrate synthase, mitochondrial                                                         |
| GVGgAcVLVA                                                  | 844.4477  | 844.4556  | 1     | 44.0  | P14115                   | 60S ribosomal protein L27a                                                              |
| IKGVGgAcVLVA +<br>Carbamidomethyl (C)                       | 1142.6482 | 1142.6578 | 2     | 51.0  | P14115                   | 60S ribosomal protein L27a                                                              |
| FcVER + Carbamidomethyl<br>(C)                              | 709.3217  | 709.3271  | 2     | 31.0  | P11862                   | Growth arrest-specific protein 2                                                        |
| VGGGWETfAGYLLKHDPcR +<br>Carbamidomethyl (C)                | 2162.0368 | 2162.0413 | 4     | 49.0  | P11862                   | Growth arrest-specific protein 2                                                        |
| VPVYcTK + Carbamidomethyl<br>(C)                            | 865.4368  | 865.4377  | 2     | 49.0  | Q9CYR6                   | Phosphoacetylglucosamine mutase                                                         |
| FADQCgAR                                                    | 866.3705  | 866.3691  | 2     | 54.0  | Q78KK3                   | Solute carrier family 22 member 18                                                      |
| cAMTALSSK +<br>Carbamidomethyl (C)                          | 967.4467  | 967.4487  | 2     | 49.0  | P80313                   | T-complex protein 1 subunit eta                                                         |
| ALIQCAK                                                     | 745.4156  | 745.4179  | 2     | 49.0  | Q64727                   | Vinculin                                                                                |
| cPSTHSEELR +<br>Carbamidomethyl (C)                         | 1214.535  | 1214.5377 | 3     | 75.0  | O09172                   | Glutamate--cysteine ligase regulatory<br>subunit                                        |
| GSLcSGcQKPITGR + 2<br>Carbamidomethyl (C)                   | 1587.7498 | 1587.7664 | +2;+3 | 105.0 | Q8VI36                   | Paxillin                                                                                |
| KVDLSQPLIATCR                                               | 1442.7915 | 1442.7956 | 3     | 67.0  | P52196                   | Thiosulfate sulfurtransferase                                                           |
| YHTINGHNcEVK +<br>Carbamidomethyl (C)                       | 1470.6674 | 1470.6664 | 3     | 45.0  | Q8BG05                   | Heterogeneous nuclear<br>ribonucleoprotein A3                                           |
| LCDFNPK                                                     | 835.3898  | 835.3939  | 2     | 48.0  | Q6IRU5,O08585            | Clathrin light chain B,Clathrin light chain<br>A                                        |
| cRNPEWGLR +<br>Carbamidomethyl (C)                          | 1186.5665 | 1186.571  | 3     | 53.0  | Q9DCS2                   | UPF0585 protein C16orf13 homolog                                                        |
| ADLECTKPAa                                                  | 1017.4801 | 1017.4854 | 2     | 47.0  | P01027                   | Complement C3                                                                           |
| cDLEDER +<br>Carbamidomethyl (C)                            | 935.3654  | 935.37    | 2     | 47.0  | Q99JI6,P35276,P6<br>2835 | Ras-related protein Rap-1b,Ras-related<br>protein Rab-3D,Ras-related protein Rap-<br>1A |
| RPPSAFFLF                                                   | 1080.5757 | 1080.5815 | 2     | 33.0  | P63158,P30681            | High mobility group protein B1,High<br>mobility group protein B2                        |

|                                                       |           |           |          |       |               |                                                                                            |
|-------------------------------------------------------|-----------|-----------|----------|-------|---------------|--------------------------------------------------------------------------------------------|
| KGDEETGPCSSSLVPEGTGATR                                | 2176.9906 | 2176.9954 | +2;+3    | 114.0 | Q9ESE1        | Lipopolysaccharide-responsive and beige-like anchor protein                                |
| SLLCMPIR                                              | 931.4983  | 931.4685  | 2        | 59.0  | P0C1Q2        | Dual 3',5'-cyclic-AMP and -GMP phosphodiesterase 11A                                       |
| SILCCLR + Carbamidomethyl (C)                         | 931.4619  | 931.4685  | 2        | 59.0  | Q9R0Q7        | Prostaglandin E synthase 3                                                                 |
| QPLSSMcPSIILDKDGQVR + Carbamidomethyl (C)             | 2143.0766 | 2143.0912 | +2;+3    | 139.0 | Q60928        | Gamma-glutamyltranspeptidase 1                                                             |
| CTLPLTGK                                              | 831.4524  | 831.4563  | 2        | 44.0  | Q9D0K2        | Succinyl-CoA:3-ketoacid coenzyme A transferase 1, mitochondrial                            |
| VDTDGNGYIScNELNDFK + Carbamidomethyl (C)              | 2172.9634 | 2172.9674 | 2        | 46.0  | Q61233        | Plastin-2                                                                                  |
| SIPICTLK                                              | 873.4994  | 873.5068  | 2        | 50.0  | P31254,Q02053 | Ubiquitin-like modifier-activating enzyme 1 Y, Ubiquitin-like modifier-activating enzyme 1 |
| SSSEEASCYR                                            | 1117.4346 | 1117.4354 | 2        | 101.0 | P0C8K7        | Small integral membrane protein 1                                                          |
| NVLcSACSGQGQK + Carbamidomethyl (C)                   | 1347.5911 | 1347.5955 | 2        | 46.0  | Q9QYJ0        | DnaJ homolog subfamily A member 2                                                          |
| SSLQSQcLNEVLK + Carbamidomethyl (C)                   | 1504.7555 | 1504.7774 | 2        | 45.0  | Q9JHU4        | Cytoplasmic dynein 1 heavy chain 1                                                         |
| AIVDALPPPcESAcSLPTDVK WFHQQK + 2 Carbamidomethyl (C)  | 3276.5584 | 3276.5697 | 4        | 49.0  | Q9D819        | Inorganic pyrophosphatase                                                                  |
| cQQLQQEYSR + Carbamidomethyl (C)                      | 1338.5986 | 1338.604  | 2        | 45.0  | Q99LM2        | CDK5 regulatory subunit-associated protein 3                                               |
| ERcEFAR + Carbamidomethyl (C)                         | 966.4341  | 966.4318  | +2;+3    | 45.0  | P08905        | Lysozyme C-2                                                                               |
| AICLER                                                | 703.3687  | 703.3696  | 2        | 46.0  | Q5PT54        | Sodium/bile acid cotransporter 5                                                           |
| ASLLcGPK + Carbamidomethyl (C)                        | 947.4568  | 947.4628  | 2        | 43.0  | Q8K3C0        | Ribonuclease kappa                                                                         |
| QSAGAASAVTK                                           | 989.5142  | 989.5339  | 2        | 42.0  | Q91VJ1        | Interferon-inducible protein AIM2                                                          |
| cLLAGLFQHqK + Carbamidomethyl (C)                     | 1313.6914 | 1313.7026 | +2;+3    | 62.0  | Q8BP40        | Lysophosphatidic acid phosphatase type 6                                                   |
| LNSIAAFSSIAISTVNHADSR                                 | 2173.1127 | 2173.057  | 2        | 42.0  | Q8BZN6        | Dedicator of cytokinesis protein 10                                                        |
| ScLLIR + Carbamidomethyl (C)                          | 760.4265  | 760.4337  | 2        | 44.0  | A2AS89        | Agmatinase, mitochondrial                                                                  |
| ScLLLR + Carbamidomethyl (C)                          | 760.4265  | 760.4337  | 2        | 44.0  | Q9D1G1,P62821 | Ras-related protein Rab-1B,Ras-related protein Rab-1A                                      |
| KHicPFR + Carbamidomethyl (C)                         | 956.5014  | 956.5035  | 3        | 42.0  | Q80V42        | Carboxypeptidase M                                                                         |
| TAVTAAGTPcQGWAQEPHR HSIFTPQTNPR + Carbamidomethyl (C) | 3386.6327 | 3386.6797 | +3;+4;+5 | 90.0  | P20918        | Plasminogen                                                                                |

|                                                        |           |           |       |       |                             |                                                                                                                                |
|--------------------------------------------------------|-----------|-----------|-------|-------|-----------------------------|--------------------------------------------------------------------------------------------------------------------------------|
| DQSDQCLR                                               | 963.408   | 963.4138  | 2     | 43.0  | Q99MR8                      | Methylcrotonoyl-CoA carboxylase subunit alpha, mitochondrial                                                                   |
| cMPTFQFYK + Carbamidomethyl (C)                        | 1220.5358 | 1220.5415 | 2     | 44.0  | P10639                      | Thioredoxin                                                                                                                    |
| TPHcFLTGHGAEK + Carbamidomethyl (C)                    | 1453.6772 | 1453.6902 | +2;+4 | 80.0  | Q8COM9                      | Isoaspartyl peptidase/L-asparaginase                                                                                           |
| VRcWQYR + Carbamidomethyl (C)                          | 1066.5131 | 1066.5119 | +2;+3 | 41.0  | Q9CZM2                      | 60S ribosomal protein L15                                                                                                      |
| LYQVEYAMEAIGHAGTcLGILANDGVLLAAER + Carbamidomethyl (C) | 3417.7061 | 3417.7152 | 4     | 41.0  | Q9R1P0                      | Proteasome subunit alpha type-4                                                                                                |
| KVVGcScVVVK + 2 Carbamidomethyl (C)                    | 1301.6836 | 1233.6673 | +2;+3 | 70.0  | P63323                      | 40S ribosomal protein S12                                                                                                      |
| GAVEccPNcR + 3 Carbamidomethyl (C)                     | 1357.5213 | 1357.53   | 2     | 39.0  | P63037                      | DnaJ homolog subfamily A member 1                                                                                              |
| TLGKHPVScK + Carbamidomethyl (C)                       | 1125.5965 | 1125.5947 | +2;+3 | 44.0  | Q61425                      | Hydroxyacyl-coenzyme A dehydrogenase, mitochondrial                                                                            |
| MKLNISFPATGCQK                                         | 1536.7792 | 1536.7867 | 3     | 42.0  | P62754                      | 40S ribosomal protein S6                                                                                                       |
| KHNLcGETEEER + Carbamidomethyl (C)                     | 1500.6627 | 1500.6696 | 3     | 68.0  | Q80W21,P15626,P19639,O35660 | Glutathione S-transferase Mu 7, Glutathione S-transferase Mu 2, Glutathione S-transferase Mu 3, Glutathione S-transferase Mu 6 |
| IAFSCPQK                                               | 892.4477  | 892.4571  | 2     | 46.0  | Q9CPV4                      | Glyoxalase domain-containing protein 4                                                                                         |
| cSHLLVK + Carbamidomethyl (C)                          | 855.4637  | 855.4641  | 2     | 38.0  | Q9QUR7                      | Peptidyl-prolyl cis-trans isomerase NIMA-interacting 1                                                                         |
| IPHFGYcDEIDLTQLVK + Carbamidomethyl (C)                | 2047.0085 | 2047.0144 | +2;+3 | 80.0  | P53395                      | Lipoamide acyltransferase component of branched-chain alpha-keto acid dehydrogenase complex, mitochondrial                     |
| PSLSLIK                                                | 756.4745  | 756.4588  | 2     | 39.0  | O54734                      | Dolichyl-diphosphooligosaccharide--protein glycosyltransferase 48 kDa subunit                                                  |
| cGEMLHIR + Carbamidomethyl (C)                         | 1014.4739 | 1014.4762 | +2;+3 | 79.0  | Q8R2N1                      | Aquaporin-3                                                                                                                    |
| RcAYVYK + Carbamidomethyl (C)                          | 958.4695  | 958.4694  | 2     | 34.0  | O55142                      | 60S ribosomal protein L35a                                                                                                     |
| VVCLFR                                                 | 735.4102  | 735.4145  | 2     | 38.0  | Q9R190                      | Metastasis-associated protein MTA2                                                                                             |
| SIVTSDALAPQVDAISADcPSLQTK + Carbamidomethyl (C)        | 2586.2847 | 2586.3101 | 3     | 101.0 | Q8BGA8                      | Acyl-coenzyme A synthetase ACSM5, mitochondrial                                                                                |



|                                       |           |           |       |       |               |                                                                                                                                |
|---------------------------------------|-----------|-----------|-------|-------|---------------|--------------------------------------------------------------------------------------------------------------------------------|
| IIEQCLNK                              | 959.511   | 959.5111  | 2     | 62.0  | Q91WD5        | NADH dehydrogenase [ubiquinone] iron-sulfur protein 2, mitochondrial                                                           |
| ALTNHTVYCSTK                          | 1336.6445 | 1336.6448 | +2;+3 | 57.0  | Q91X52        | L-xylulose reductase                                                                                                           |
| GASVEHVcHR + Carbamidomethyl (C)      | 1150.5302 | 1150.5343 | +2;+3 | 44.0  | Q9QXB9        | Developmentally-regulated GTP-binding protein 2                                                                                |
| GIQVSNNGPCLGSR                        | 1400.683  | 1400.6888 | 2     | 66.0  | P41216        | Long-chain-fatty-acid--CoA ligase 1                                                                                            |
| FcPFYK + Carbamidomethyl (C)          | 860.3891  | 860.3893  | +1;+2 | 40.0  | P50516        | V-type proton ATPase catalytic subunit A                                                                                       |
| KAMLEGLDILLAQK                        | 1541.8851 | 1541.8671 | 3     | 36.0  | E9Q5G7        | Oogenesis-1                                                                                                                    |
| SIGcDRPINYR + Carbamidomethyl (C)     | 1349.651  | 1349.6526 | +2;+3 | 40.0  | Q8BGC4        | Zinc-binding alcohol dehydrogenase domain-containing protein 2                                                                 |
| NGPcGTVLR + Carbamidomethyl (C)       | 972.4811  | 972.4882  | 2     | 35.0  | Q91X17        | Uromodulin                                                                                                                     |
| LTEKESEcTDVcR + 2 Carbamidomethyl (C) | 1693.7287 | 1693.7328 | 3     | 35.0  | Q9QXZ6        | Solute carrier organic anion transporter family member 1A1                                                                     |
| SFTSSCPVSAFVPK                        | 1455.7068 | 1455.7083 | 2     | 96.0  | Q8R0F8        | Acylpyruvase FAHD1, mitochondrial                                                                                              |
| YIcPHAPR + Carbamidomethyl (C)        | 1012.4913 | 1012.4917 | 3     | 36.0  | Q9WTL7        | Acyl-protein thioesterase 2                                                                                                    |
| GFGHIGIAVPDVYSACK                     | 1732.8607 | 1732.8637 | +2;+3 | 118.0 | Q9CPU0        | Lactoylglutathione lyase                                                                                                       |
| cYNPDFEK + Carbamidomethyl (C)        | 1071.4331 | 1071.4362 | 2     | 33.0  | P10649        | Glutathione S-transferase Mu 1                                                                                                 |
| EANPCPcDIGHK + Carbamidomethyl (C)    | 1407.5911 | 1407.5899 | +2;+3 | 45.0  | Q8R1G2        | Carboxymethylenebutenolidase homolog                                                                                           |
| cHLLVEHETQK + Carbamidomethyl (C)     | 1392.682  | 1392.6821 | 4     | 32.0  | O54988,O55098 | STE20-like serine/threonine-protein kinase,Serine/threonine-protein kinase 10                                                  |
| IGcFLR + Carbamidomethyl (C)          | 764.4003  | 764.4034  | 2     | 36.0  | O35961,O35982 | Submaxillary gland androgen-regulated protein 2, isoform epsilon,Submaxillary gland androgen-regulated protein 2, isoform beta |
| VAcFLR + Carbamidomethyl (C)          | 764.4003  | 764.4034  | 2     | 36.0  | Q0VBB0        | PRELI domain-containing protein 2                                                                                              |
| KEGTSPITFQFYK                         | 1544.7875 | 1544.7966 | 3     | 32.0  | Q08481        | Platelet endothelial cell adhesion molecule                                                                                    |

|                                                   |           |           |       |       |                             |                                                                                                                           |
|---------------------------------------------------|-----------|-----------|-------|-------|-----------------------------|---------------------------------------------------------------------------------------------------------------------------|
| cDIDIR + Carbamidomethyl (C)                      | 790.3643  | 790.3647  | +1;+2 | 43.0  | P68033,P68134,P63268,P62737 | Actin, alpha cardiac muscle 1,Actin, alpha skeletal muscle,Actin, gamma-enteric smooth muscle,Actin, aortic smooth muscle |
| DPVVQGVNGFEAEFSK                                  | 1721.8261 | 1721.8935 | 2     | 31.0  | P01738                      | T-cell receptor alpha chain V region PHDS58                                                                               |
| GFEVVMTEPIDEYcVQQLK + Carbamidomethyl (C)         | 2447.1389 | 2447.1494 | 2     | 78.0  | P11499                      | Heat shock protein HSP 90-beta                                                                                            |
| QDFLFHKSGALEGQP                                   | 1819.8893 | 1819.8386 | 2     | 30.0  | Q9CR83                      | Probable RNA-binding protein 18                                                                                           |
| VEISAWFQEAI SFIDSVKNSGG R                         | 2539.2707 | 2539.1987 | 3     | 30.0  | Q05922                      | Dual specificity protein phosphatase 2                                                                                    |
| NGDHcLLYHRDYISGYGK + Carbamidomethyl (C)          | 2166.9905 | 2167.0044 | +3;+4 | 52.0  | Q6DYE8                      | Ectonucleotide pyrophosphatase/phosphodiesterase family member 3                                                          |
| ESKPYPEDPScTMTEFHSTPK + Carbamidomethyl (C)       | 2467.0672 | 2467.0859 | +3;+4 | 120.0 | P97449                      | Aminopeptidase N                                                                                                          |
| ETcPSLQGVHNTSYPR + Carbamidomethyl (C)            | 1844.8475 | 1844.8474 | 3     | 39.0  | Q9DCN1                      | Peroxisomal NADH pyrophosphatase NUDT12                                                                                   |
| EGYAWAEDKEHcEEYGR + Carbamidomethyl (C)           | 2127.8592 | 2127.8814 | 4     | 34.0  | Q99LF4                      | tRNA-splicing ligase RtcB homolog                                                                                         |
| ITAFVPNDGcLNFIENDEVLV AGFGR + Carbamidomethyl (C) | 2995.4386 | 2995.4914 | 3     | 30.0  | P62267                      | 40S ribosomal protein S23                                                                                                 |
| RPcFSAL + Carbamidomethyl (C)                     | 849.4167  | 849.4268  | 2     | 51.0  | P07724                      | Serum albumin                                                                                                             |
| AADKDTcFSTEGPNLVTR + Carbamidomethyl (C)          | 1980.9211 | 1980.9311 | 3     | 104.0 | P07724                      | Serum albumin                                                                                                             |
| ccSGSLVERRPcFSAL + 3 Carbamidomethyl (C)          | 2033.9121 | 2033.9385 | 3     | 35.0  | P07724                      | Serum albumin                                                                                                             |
| cAFMGSLAPGHVADFLVADFR QR + Carbamidomethyl (C)    | 2564.2417 | 2564.2747 | +3;+4 | 117.0 | P97328                      | Ketohexokinase                                                                                                            |
| LGQFQcR + Carbamidomethyl (C)                     | 907.4334  | 907.4346  | 2     | 47.0  | A2ARV4                      | Low-density lipoprotein receptor-related protein 2                                                                        |
| YcVVDTGAR + Carbamidomethyl (C)                   | 1039.4757 | 1039.4834 | 2     | 53.0  | A2ARV4                      | Low-density lipoprotein receptor-related protein 2                                                                        |
| GSYEcFVDGFK + 2 Carbamidomethyl (C)               | 1467.5799 | 1467.5897 | 2     | 66.0  | A2ARV4                      | Low-density lipoprotein receptor-related protein 2                                                                        |
| cGcAFGTLEDDGK + 2 Carbamidomethyl (C)             | 1496.5912 | 1496.6096 | 2     | 85.0  | A2ARV4                      | Low-density lipoprotein receptor-related protein 2                                                                        |
| ALQASALAAWGGK                                     | 1242.672  | 1242.6871 | 2     | 110.0 | Q91Y97                      | Fructose-bisphosphate aldolase B                                                                                          |

|                                                   |           |           |       |       |                             |                                                                                                                                                                                                                     |
|---------------------------------------------------|-----------|-----------|-------|-------|-----------------------------|---------------------------------------------------------------------------------------------------------------------------------------------------------------------------------------------------------------------|
| AMANcQAAQGQYVHTG + Carbamidomethyl (C)            | 1705.7301 | 1705.7394 | 2     | 85.0  | Q91Y97                      | Fructose-bisphosphate aldolase B                                                                                                                                                                                    |
| GcKVDNSSLTGESEPQTR + Carbamidomethyl (C)          | 1963.8905 | 1963.9068 | 3     | 101.0 | Q8VDN2,Q6PIE5,Q6PIC6,Q64436 | Sodium/potassium-transporting ATPase subunit alpha-1,Sodium/potassium-transporting ATPase subunit alpha-2,Sodium/potassium-transporting ATPase subunit alpha-3,Potassium-transporting ATPase alpha chain 1          |
| NLEAVETLGSTSTicSDKTGTLT QNR + Carbamidomethyl (C) | 2795.3607 | 2795.4044 | 3     | 156.0 | Q8VDN2,Q6PIE5,Q6PIC6,Q9WV27 | Sodium/potassium-transporting ATPase subunit alpha-1,Sodium/potassium-transporting ATPase subunit alpha-2,Sodium/potassium-transporting ATPase subunit alpha-3,Sodium/potassium-transporting ATPase subunit alpha-4 |
| MAEHSHcSLGIKAK + Carbamidomethyl (C)              | 1567.7599 | 1567.7664 | 3     | 59.0  | Q8K0L3                      | Acyl-coenzyme A synthetase ACSM2, mitochondrial                                                                                                                                                                     |
| QGAALGIPYFTAcR + Carbamidomethyl (C)              | 1523.7555 | 1523.7751 | 2     | 113.0 | P47199                      | Quinone oxidoreductase                                                                                                                                                                                              |
| IQEAGTEVVK                                        | 1072.5764 | 1072.5795 | 2     | 31.0  | P08249                      | Malate dehydrogenase, mitochondrial                                                                                                                                                                                 |
| AGAGSATLSMAYAGAR                                  | 1453.6983 | 1453.7081 | 2     | 118.0 | P08249                      | Malate dehydrogenase, mitochondrial                                                                                                                                                                                 |
| ANVKGYLGPEQLPDcLK + Carbamidomethyl (C)           | 1900.9717 | 1900.995  | 3     | 55.0  | P08249                      | Malate dehydrogenase, mitochondrial                                                                                                                                                                                 |
| TIIPLIQcTPKVDFPQDQLATL TGR + Carbamidomethyl (C)  | 2911.5477 | 2911.5501 | 3     | 127.0 | P08249                      | Malate dehydrogenase, mitochondrial                                                                                                                                                                                 |
| TIGGGDSDFTFFcETGAGKHV PR + Carbamidomethyl (C)    | 2556.1704 | 2556.197  | +3;+4 | 114.0 | P68368                      | Tubulin alpha-4A chain                                                                                                                                                                                              |
| AYHEQLSVAEITNAcFEPANQ MVK + Carbamidomethyl (C)   | 2749.284  | 2749.2995 | +2;+3 | 162.0 | P68368,P05214,P68369,P05213 | Tubulin alpha-4A chain,Tubulin alpha-3 chain,Tubulin alpha-1A chain,Tubulin alpha-1B chain                                                                                                                          |
| TKcDEWSIIEGK + Carbamidomethyl (C)                | 1551.7239 | 1551.7345 | 2     | 113.0 | Q92111                      | Serotransferrin                                                                                                                                                                                                     |
| IEcESAETTEDcIEK + 2 Carbamidomethyl (C)           | 1880.7655 | 1880.7824 | 2     | 38.0  | Q92111                      | Serotransferrin                                                                                                                                                                                                     |
| SAGWVPIGILLFcKLSEPR + Carbamidomethyl (C)         | 2142.166  | 2142.1842 | 3     | 38.0  | Q92111                      | Serotransferrin                                                                                                                                                                                                     |

|                                                           |           |           |          |       |               |                                                                 |
|-----------------------------------------------------------|-----------|-----------|----------|-------|---------------|-----------------------------------------------------------------|
| AASEKScNcLLLK + 2 Carbamidomethyl (C)                     | 1492.7377 | 1492.7528 | 3        | 53.0  | P17182        | Alpha-enolase                                                   |
| LAcGVIGIAQ + Carbamidomethyl (C)                          | 1000.5376 | 1000.54   | 2        | 41.0  | P08228        | Superoxide dismutase [Cu-Zn]                                    |
| ETVSEESNVLCLSK + Carbamidomethyl (C)                      | 1593.7556 | 1593.7632 | 2        | 96.0  | P58252        | Elongation factor 2                                             |
| RSALHESVQcAVDVK + Carbamidomethyl (C)                     | 1697.8519 | 1697.8938 | 2        | 31.0  | P24270        | Catalase                                                        |
| LVIIITAGAR                                                | 912.5756  | 912.586   | 2        | 66.0  | P06151,P00342 | L-lactate dehydrogenase A chain,L-lactate dehydrogenase C chain |
| YNLTPTIFFcATPPDDGNLcR + 2 Carbamidomethyl (C)             | 2539.1512 | 2539.1798 | +2;+3    | 125.0 | Q64442        | Sorbitol dehydrogenase                                          |
| AAAQSTVYAFsARPLTGGEpVS LGSLR                              | 2705.4137 | 2705.4341 | 3        | 78.0  | P11352        | Glutathione peroxidase 1                                        |
| VEcHPYLAQNELIAHcHAR + 2 Carbamidomethyl (C)               | 2385.1106 | 2385.1362 | +3;+4;+5 | 82.0  | Q9JII6        | Alcohol dehydrogenase [NADP(+)]                                 |
| QVEcHPYLAQNELIAHcHAR + 2 Carbamidomethyl (C)              | 2513.1692 | 2513.1954 | +4;+5    | 70.0  | Q9JII6        | Alcohol dehydrogenase [NADP(+)]                                 |
| ASVRPAVLQVEcHPYLAQNELI AHcHAR + 2 Carbamidomethyl (C)     | 3306.6502 | 3306.6942 | 4        | 45.0  | Q9JII6        | Alcohol dehydrogenase [NADP(+)]                                 |
| GAVEPcAQPR + Carbamidomethyl (C)                          | 1083.5131 | 1083.5192 | 2        | 70.0  | Q9JIL4        | Na(+)/H(+) exchange regulatory cofactor NHE-RF3                 |
| SSGKHVTLVcGK + Carbamidomethyl (C)                        | 1384.7497 | 1384.7613 | 3        | 78.0  | Q9JIL4        | Na(+)/H(+) exchange regulatory cofactor NHE-RF3                 |
| YDNSLKIVSNAScTTNcLAPLAK + 2 Carbamidomethyl (C)           | 2539.241  | 2539.274  | 3        | 68.0  | P16858        | Glyceraldehyde-3-phosphate dehydrogenase                        |
| YSVAVKcATITPDEAR + Carbamidomethyl (C)                    | 1779.8825 | 1779.9011 | +2;+3    | 119.0 | P54071        | Isocitrate dehydrogenase [NADP], mitochondrial                  |
| HVETNScDVQRLLHVK + Carbamidomethyl (C)                    | 1933.9792 | 1933.9984 | 4        | 36.0  | Q62468        | Villin-1                                                        |
| VASVAHSAPSEAPScSPFGK + Carbamidomethyl (C)                | 1984.9313 | 1984.9527 | +2;+3    | 120.0 | P70290        | 55 kDa erythrocyte membrane protein                             |
| VASVAHSAPSEAPScSPFGKK + Carbamidomethyl (C)               | 2113.0262 | 2113.0412 | +3;+4    | 94.0  | P70290        | 55 kDa erythrocyte membrane protein                             |
| EGASKKPVPLQELWGPcPR + Carbamidomethyl (C)                 | 2148.115  | 2148.1409 | +3;+4    | 84.0  | Q9WUB6        | Chloride channel protein ClC-Kb                                 |
| TKLVVSDHSHEGWLDfSLIK + Carbamidomethyl (C)                | 2470.2315 | 2470.2575 | 4        | 59.0  | Q91VA0        | Acyl-coenzyme A synthetase ACSM1, mitochondrial                 |
| LVKAFQFVETHGEVcPANWTP ESPTIKPSPTASK + Carbamidomethyl (C) | 3752.8872 | 3752.9077 | +4;+5    | 62.0  | P20108        | Thioredoxin-dependent peroxide reductase, mitochondrial         |
| GQKIPIFSAAGLPHNEIAAQIcR + Carbamidomethyl (C)             | 2490.3165 | 2490.342  | +3;+4    | 130.0 | P62814        | V-type proton ATPase subunit B, brain isoform                   |
| QITINDLPVGR                                               | 1224.6826 | 1224.6943 | 2        | 69.0  | P35700        | Peroxioredoxin-1                                                |

|                                                      |           |           |       |       |                             |                                                                  |
|------------------------------------------------------|-----------|-----------|-------|-------|-----------------------------|------------------------------------------------------------------|
| PVWGGGNKcGAcGR + 2 Carbamidomethyl (C)               | 1542.682  | 1542.6965 | +2;+3 | 85.0  | P97314                      | Cysteine and glycine-rich protein 2                              |
| YSPiADMLcEAGR + Carbamidomethyl (C)                  | 1481.6643 | 1481.6728 | 2     | 104.0 | Q9DBM2                      | Peroxisomal bifunctional enzyme                                  |
| IGKIGVVVGNCyGFVGNR + Carbamidomethyl (C)             | 1908.004  | 1908.0253 | 3     | 103.0 | Q9DBM2                      | Peroxisomal bifunctional enzyme                                  |
| cAVVDVPFGGAK + Carbamidomethyl (C)                   | 1218.6067 | 1218.6099 | 2     | 100.0 | P26443                      | Glutamate dehydrogenase 1, mitochondrial                         |
| DLAAcIKGLPNVQR + Carbamidomethyl (C)                 | 1553.8348 | 1553.8401 | 3     | 32.0  | O88844                      | Isocitrate dehydrogenase [NADP] cytoplasmic                      |
| ITFcIDPSLGLNEEQKGFQK + Carbamidomethyl (C)           | 2323.1518 | 2323.161  | 3     | 115.0 | Q9D7B6                      | Isobutyryl-CoA dehydrogenase, mitochondrial                      |
| GLTSVINQK                                            | 958.5447  | 958.5556  | 2     | 49.0  | P16125                      | L-lactate dehydrogenase B chain                                  |
| ASGAVGLSYGAHSNLcVNQIV R + Carbamidomethyl (C)        | 2272.1382 | 2272.1473 | 3     | 125.0 | Q9JHI5                      | Isovaleryl-CoA dehydrogenase, mitochondrial                      |
| GIQVSNNGPcLGSR + Carbamidomethyl (C)                 | 1457.7045 | 1457.7114 | 2     | 101.0 | P41216                      | Long-chain-fatty-acid--CoA ligase 1                              |
| LGSPVPScSVVGTISSYYVQR + Carbamidomethyl (C)          | 2255.1256 | 2255.1486 | +2;+3 | 128.0 | Q3TNA1                      | Xylulose kinase                                                  |
| YLTVAAVFR                                            | 1038.5862 | 1038.5963 | 2     | 76.0  | Q9D6F9,P68372,P99024        | Tubulin beta-4A chain,Tubulin beta-4B chain,Tubulin beta-5 chain |
| DTLVWDTPYHTVWDCDFRTG K + Carbamidomethyl (C)         | 2611.1802 | 2611.2033 | 3     | 58.0  | Q99NB1                      | Acetyl-coenzyme A synthetase 2-like, mitochondrial               |
| LILADALcYAHTFNPK + Carbamidomethyl (C)               | 1845.9447 | 1845.9636 | +2;+3 | 113.0 | Q9CPY7                      | Cytosol aminopeptidase                                           |
| TFYGLHQDFPSVVVVLGKR                                  | 2218.1899 | 2218.2081 | 4     | 37.0  | Q9CPY7                      | Cytosol aminopeptidase                                           |
| TIQVDNTDAEGRLILADALcYAHTFNPK + Carbamidomethyl (C)   | 3145.5502 | 3145.586  | 4     | 32.0  | Q9CPY7                      | Cytosol aminopeptidase                                           |
| QALAHGLKcK + Carbamidomethyl (C)                     | 1124.6124 | 1124.6201 | +2;+3 | 63.0  | Q99K10                      | Aconitate hydratase, mitochondrial                               |
| EVESVTPEHcIFASNTSALPINQ IAAVSK + Carbamidomethyl (C) | 3111.5546 | 3111.6058 | 3     | 138.0 | Q8BMS1                      | Trifunctional enzyme subunit alpha, mitochondrial                |
| cTPSVISFGSK + Carbamidomethyl (C)                    | 1181.5751 | 1181.5837 | 2     | 51.0  | Q61699                      | Heat shock protein 105 kDa                                       |
| SIGVSNFNRR                                           | 1148.605  | 1148.616  | 3     | 32.0  | Q8K023                      | Aldo-keto reductase family 1 member C18                          |
| EGLLLWcQRK + Carbamidomethyl (C)                     | 1301.6914 | 1301.7087 | 3     | 37.0  | Q7TPR4,P57780,O88990,Q9JI91 | Alpha-actinin-1,Alpha-actinin-4,Alpha-actinin-3,Alpha-actinin-2  |
| LVNWSctLNSAISDIEVDKK + Carbamidomethyl (C)           | 2291.1467 | 2291.1711 | 3     | 140.0 | Q9Z1Q9                      | Valine--tRNA ligase                                              |
| SLcAFRQAPLLIGSTK + Carbamidomethyl (C)               | 1760.9607 | 1760.9812 | 3     | 56.0  | P19096                      | Fatty acid synthase                                              |
| EEEEAVLPGAQPTLISAISKTFc PAHK + Carbamidomethyl (C)   | 3019.5324 | 3019.5667 | 4     | 62.0  | P19096                      | Fatty acid synthase                                              |

|                                                 |           |           |       |       |        |                                                                   |
|-------------------------------------------------|-----------|-----------|-------|-------|--------|-------------------------------------------------------------------|
| AGDELTKIEDEDEQGWcK + Carbamidomethyl (C)        | 2121.9161 | 2121.9474 | +2;+3 | 135.0 | Q9WVE8 | Protein kinase C and casein kinase substrate in neurons protein 2 |
| NPVDDIcIcAPR + Carbamidomethyl (C)              | 1396.7133 | 1396.717  | +2;+3 | 101.0 | P32261 | Antithrombin-III                                                  |
| TVQcLSR + Carbamidomethyl (C)                   | 862.4331  | 862.4349  | 2     | 54.0  | Q91ZA3 | Propionyl-CoA carboxylase alpha chain, mitochondrial              |
| DLGGNAKcSDFTEEIcR + 2 Carbamidomethyl (C)       | 2038.8724 | 2038.8906 | 3     | 46.0  | Q9D6R2 | Isocitrate dehydrogenase [NAD] subunit alpha, mitochondrial       |
| REGSSGKPVTLQELWGPcPR + Carbamidomethyl (C)      | 2253.1324 | 2253.1553 | 4     | 66.0  | Q9WUB7 | Chloride channel protein ClC-Ka                                   |
| VYFAVEDTDccTR + 2 Carbamidomethyl (C)           | 1634.6705 | 1634.6832 | 2     | 101.0 | Q9JJ00 | Phospholipid scramblase 1                                         |
| IcNQVLVcERK + 2 Carbamidomethyl (C)             | 1417.717  | 1485.7544 | 3     | 38.0  | Q9Z2I9 | Succinate--CoA ligase [ADP-forming] subunit beta, mitochondrial   |
| GRicNQVLVcER + 2 Carbamidomethyl (C)            | 1502.7446 | 1502.7546 | +2;+3 | 103.0 | Q9Z2I9 | Succinate--CoA ligase [ADP-forming] subunit beta, mitochondrial   |
| LGANSGLHIIIFDEIDAicKQR + Carbamidomethyl (C)    | 2482.3002 | 2482.3201 | +3;+4 | 125.0 | P46460 | Vesicle-fusing ATPase                                             |
| GGFSWDNcDEGKDPaVIK + Carbamidomethyl (C)        | 1993.884  | 1993.9081 | +2;+3 | 95.0  | Q60648 | Ganglioside GM2 activator                                         |
| APDQDEIDcLPLAK + Carbamidomethyl (C)            | 1640.7716 | 1640.7926 | 2     | 120.0 | P16675 | Lysosomal protective protein                                      |
| NNILRTSLDLYANVIHcK + Carbamidomethyl (C)        | 2143.1208 | 2143.146  | 3     | 101.0 | P70404 | Isocitrate dehydrogenase [NAD] subunit gamma 1, mitochondrial     |
| TSLDLYANVIHcKSLPGVVTR + Carbamidomethyl (C)     | 2342.2417 | 2342.2691 | 4     | 38.0  | P70404 | Isocitrate dehydrogenase [NAD] subunit gamma 1, mitochondrial     |
| VHSPSGAVEEchVSELEPDKYA VR + Carbamidomethyl (C) | 2694.2708 | 2694.3005 | +3;+4 | 66.0  | Q80X90 | Filamin-B                                                         |
| SKDIEVLEGGPIYVdCYGNLAPLTK + Carbamidomethyl (C) | 2821.4572 | 2821.4965 | 3     | 75.0  | G5E8K5 | Ankyrin-3                                                         |
| WVPEITHHcPK + Carbamidomethyl (C)               | 1402.6816 | 1402.6862 | +3;+4 | 50.0  | P60766 | Cell division control protein 42 homolog                          |
| AcLYAGVK + Carbamidomethyl (C)                  | 880.4477  | 880.4527  | 2     | 74.0  | P15105 | Glutamine synthetase                                              |
| TcLLNETGDEPFQYKN + Carbamidomethyl (C)          | 1927.8622 | 1927.8896 | 2     | 78.0  | P15105 | Glutamine synthetase                                              |
| LSAPGcWLAcTSFSR + 2 Carbamidomethyl (C)         | 1711.7811 | 1711.7907 | 2     | 139.0 | Q9R1Q7 | Proteolipid protein 2                                             |
| VHTGPCCcccPccPPLILTR + 5 Carbamidomethyl (C)    | 2539.0432 | 2539.0474 | 3     | 47.0  | Q8R000 | Organic solute transporter subunit alpha                          |
| VHTGPccccPccPPLILTRK + 7 Carbamidomethyl (C)    | 2645.1286 | 2645.1557 | 4     | 41.0  | Q8R000 | Organic solute transporter subunit alpha                          |

|                                                               |           |           |       |       |               |                                                                          |
|---------------------------------------------------------------|-----------|-----------|-------|-------|---------------|--------------------------------------------------------------------------|
| KGDEVQcEIEELGVIINK + Carbamidomethyl (C)                      | 2072.0459 | 2072.0708 | +2;+3 | 131.0 | Q3TC72        | Fumarylacetoacetate hydrolase domain-containing protein 2A               |
| GSAVIHTDEASSEVLVYPNYQSc WVVK + Carbamidomethyl (C)            | 2952.3964 | 2952.4065 | 3     | 104.0 | Q8BP40        | Lysophosphatidic acid phosphatase type 6                                 |
| GSAVIHTDEASSEVLVYPNYQSc WVLKEK + Carbamidomethyl (C)          | 3209.5339 | 3209.5792 | 4     | 73.0  | Q8BP40        | Lysophosphatidic acid phosphatase type 6                                 |
| LAVSIPPGPDQQPHQcCLR + Carbamidomethyl (C)                     | 2012.0262 | 2012.0353 | 3     | 65.0  | Q8CFZ5        | Solute carrier family 22 member 12                                       |
| ALVDHENVIScPHLGASTK + Carbamidomethyl (C)                     | 2047.0157 | 2047.0377 | +3;+4 | 79.0  | Q61753        | D-3-phosphoglycerate dehydrogenase                                       |
| LVSGYDSYGNicGQR + Carbamidomethyl (C)                         | 1687.7624 | 1687.7871 | 2     | 111.0 | Q6X893        | Choline transporter-like protein 1                                       |
| ATDAQLcLESSPK + Carbamidomethyl (C)                           | 1418.6711 | 1418.6833 | 2     | 100.0 | Q9ESE1,Q9EPN1 | Lipopolysaccharide-responsive and beige-like anchor protein,Neurobeachin |
| NALANPLYcPDYR + Carbamidomethyl (C)                           | 1565.7296 | 1565.7449 | 2     | 91.0  | Q9DB77        | Cytochrome b-c1 complex subunit 2, mitochondrial                         |
| LGDVISIQcPDVK + Carbamidomethyl (C)                           | 1539.7967 | 1539.8112 | 2     | 87.0  | Q01853        | Transitional endoplasmic reticulum ATPase                                |
| MKLNISFPATGcQK + Carbamidomethyl (C)                          | 1593.8007 | 1593.8099 | +2;+3 | 93.0  | P62754        | 40S ribosomal protein S6                                                 |
| ALEHFTDLIDIKR                                                 | 1619.8307 | 1619.848  | 4     | 56.0  | Q68FD5        | Clathrin heavy chain 1                                                   |
| AVIFcLSADKK + Carbamidomethyl (C)                             | 1250.6693 | 1250.6844 | 3     | 56.0  | Q9R0P5        | Destrin                                                                  |
| GKDcAVIVTQK + Carbamidomethyl (C)                             | 1217.6438 | 1217.6529 | +2;+3 | 91.0  | Q9QUM9        | Proteasome subunit alpha type-6                                          |
| IGTSGGIGLEPGSVVITQQAVN EcFKPEFEQIVLGKR + Carbamidomethyl (C)  | 3957.067  | 3957.1191 | 4     | 95.0  | P52624        | Uridine phosphorylase 1                                                  |
| ADLEcTKPAA + Carbamidomethyl (C)                              | 1074.5015 | 1074.5049 | 2     | 52.0  | P01027        | Complement C3                                                            |
| VYSYNNLEEScTR + Carbamidomethyl (C)                           | 1682.7246 | 1682.7445 | 2     | 90.0  | P01027        | Complement C3                                                            |
| GVPDPNHPNcVGAAR + Carbamidomethyl (C)                         | 1561.742  | 1561.7546 | +2;+3 | 68.0  | Q9QXE0        | 2-hydroxyacyl-CoA lyase 1                                                |
| cGYAGSNFPEHIFPALVGRPIIR + Carbamidomethyl (C)                 | 2570.3216 | 2570.3409 | 4     | 38.0  | P61161        | Actin-related protein 2                                                  |
| ASSTcQLTFENVKVPETNILGK + Carbamidomethyl (C)                  | 2435.2366 | 2435.2466 | 3     | 118.0 | Q9DBL1        | Short/branched chain specific acyl-CoA dehydrogenase, mitochondrial      |
| AGFAGDQIPKYcFPNYVGRPK + Carbamidomethyl (C)                   | 2384.1736 | 2384.1978 | +3;+4 | 85.0  | Q8R5C5,P61164 | Beta-centractin,Alpha-centractin                                         |
| GKTEIQVncPK + Carbamidomethyl (C)                             | 1272.6496 | 1272.6506 | +2;+3 | 72.0  | O09117        | Synaptophysin-like protein 1                                             |
| YGSQQcYTAAGTQLLSDST SGSTPDRGHDWGAPPYR + 2 Carbamidomethyl (C) | 4204.824  | 4204.8933 | 4     | 88.0  | Q9DBX3        | Sushi domain-containing protein 2                                        |
| QREESQQAVLAQEcR + Carbamidomethyl (C)                         | 2087.9654 | 2087.965  | 3     | 86.0  | Q64331        | Unconventional myosin-VI                                                 |

|                                                |           |           |       |       |               |                                                                                     |
|------------------------------------------------|-----------|-----------|-------|-------|---------------|-------------------------------------------------------------------------------------|
| cSQPVSVKER + Carbamidomethyl (C)               | 1188.5921 | 1188.6023 | +2;+3 | 64.0  | Q99MN9        | Propionyl-CoA carboxylase beta chain, mitochondrial                                 |
| IGAFGYMEcSAK + Carbamidomethyl (C)             | 1332.5842 | 1332.5886 | 2     | 107.0 | Q9QUI0        | Transforming protein RhoA                                                           |
| KGAHFVQLccQR + 2 Carbamidomethyl (C)           | 1570.7497 | 1570.7644 | 3     | 40.0  | Q3ULD5        | Methylcrotonoyl-CoA carboxylase beta chain, mitochondrial                           |
| IYNcHVLLNSK + Carbamidomethyl (C)              | 1359.6969 | 1359.7081 | +2;+3 | 88.0  | Q8VVK1        | Nitrilase homolog 1                                                                 |
| NYcNIQVTK + Carbamidomethyl (C)                | 1138.5441 | 1138.5592 | 2     | 55.0  | Q5XJY5        | Coatomer subunit delta                                                              |
| YYQLGcWGPGLPLYTLHR + Carbamidomethyl (C)       | 2193.083  | 2193.0863 | +2;+3 | 111.0 | P28843        | Dipeptidyl peptidase 4                                                              |
| NPTYKEVcSEK + Carbamidomethyl (C)              | 1353.6234 | 1353.6314 | +2;+3 | 86.0  | Q9D6Y7        | Mitochondrial peptide methionine sulfoxide reductase                                |
| SSGEIVYcGQVFEKSPLR + Carbamidomethyl (C)       | 2055.0095 | 2055.0426 | 2     | 65.0  | P62717        | 60S ribosomal protein L18a                                                          |
| AQNVPLPVSTLVEFVIAATDcTAK + Carbamidomethyl (C) | 2543.3305 | 2543.3636 | 3     | 109.0 | P29699        | Alpha-2-HS-glycoprotein                                                             |
| STcIYGGAPK + Carbamidomethyl (C)               | 1052.4961 | 1052.5038 | 2     | 79.0  | Q501J6,Q61656 | Probable ATP-dependent RNA helicase DDX17, Probable ATP-dependent RNA helicase DDX5 |
| LKSTcIYGGAPK + Carbamidomethyl (C)             | 1293.6751 | 1293.6794 | +2;+3 | 46.0  | Q501J6        | Probable ATP-dependent RNA helicase DDX17                                           |
| HYQTIQEAGDWcVPSTEPK + Carbamidomethyl (C)      | 2245.011  | 2245.0234 | 3     | 106.0 | Q9JK42        | [Pyruvate dehydrogenase (acetyl-transferring)] kinase isozyme 2, mitochondrial      |
| SVSEDEVHVSLSLHcYFVR + Carbamidomethyl (C)      | 2069.9742 | 2070.0052 | 3     | 78.0  | P58137        | Acyl-coenzyme A thioesterase 8                                                      |
| VIEDYNGAccPLNR + 2 Carbamidomethyl (C)         | 1679.7396 | 1679.7607 | 2     | 77.0  | Q9CPV7        | Palmitoyltransferase ZDHHC6                                                         |
| ScTYTYLLGDRESR + Carbamidomethyl (C)           | 1719.7886 | 1719.7947 | +2;+3 | 52.0  | Q9DCM0        | Persulfide dioxygenase ETHE1, mitochondrial                                         |
| cFVYPLDFAR + Carbamidomethyl (C)               | 1286.6118 | 1286.6244 | 2     | 81.0  | P48962,P51881 | ADP/ATP translocase 1,ADP/ATP translocase 2                                         |
| IAAELNcDPTDER + Carbamidomethyl (C)            | 1502.6671 | 1502.6826 | 2     | 75.0  | Q9CXF0        | Kynureninase                                                                        |
| VcNPIITKL + Carbamidomethyl (C)                | 1056.6001 | 1056.6116 | 2     | 60.0  | P63017        | Heat shock cognate 71 kDa protein                                                   |
| MGVPYcIIK + Carbamidomethyl (C)                | 1079.5508 | 1079.5579 | 2     | 65.0  | P12970        | 60S ribosomal protein L7a                                                           |
| MGVPYcIIKKG + Carbamidomethyl (C)              | 1264.6672 | 1264.6803 | 3     | 51.0  | P12970        | 60S ribosomal protein L7a                                                           |
| EQAALQEGHKcLcLSTVDLEVK + Carbamidomethyl (C)   | 2367.2104 | 2367.2154 | +3;+4 | 80.0  | Q8CGA3        | Large neutral amino acids transporter small subunit 4                               |
| ILSGVVTK                                       | 815.5117  | 815.5202  | 2     | 73.0  | P62281        | 40S ribosomal protein S11                                                           |



|                                             |           |           |       |      |               |                                                                                                           |
|---------------------------------------------|-----------|-----------|-------|------|---------------|-----------------------------------------------------------------------------------------------------------|
| IcDELIk + Carbamidomethyl (C)               | 960.495   | 960.5042  | 2     | 70.0 | Q9JJG0,Q6Y685 | Transforming acidic coiled-coil-containing protein 2,Transforming acidic coiled-coil-containing protein 1 |
| AAEcNIVVTQPR + Carbamidomethyl (C)          | 1356.682  | 1356.6952 | 2     | 84.0 | O70133        | ATP-dependent RNA helicase A                                                                              |
| NIGASVEFHcAVPNER + Carbamidomethyl (C)      | 1798.8421 | 1798.8595 | 2     | 69.0 | Q05793        | Basement membrane-specific heparan sulfate proteoglycan core protein                                      |
| DFEScLGAK + Carbamidomethyl (C)             | 1025.4488 | 1025.4772 | 2     | 30.0 | P28271        | Cytoplasmic aconitate hydratase                                                                           |
| QITLNDLPVGR                                 | 1224.6826 | 1224.6943 | 2     | 69.0 | O08807        | Peroxioredoxin-4                                                                                          |
| SGEGcVTR + Carbamidomethyl (C)              | 977.46    | 977.4669  | 2     | 77.0 | Q9WV54        | Acid ceramidase                                                                                           |
| NTNDANScQIIPQNVNRK + Carbamidomethyl (C)    | 2326.1448 | 2326.1721 | 3     | 66.0 | Q61598,P50396 | Rab GDP dissociation inhibitor beta,Rab GDP dissociation inhibitor alpha                                  |
| KIVITDcGQLS + Carbamidomethyl (C)           | 1232.6435 | 1232.6501 | 2     | 65.0 | Q99KR7        | Peptidyl-prolyl cis-trans isomerase F, mitochondrial                                                      |
| RIAFSTSSLLK                                 | 1221.7081 | 1221.7296 | 2     | 30.0 | Q9R0X4,Q32MW3 | Acyl-coenzyme A thioesterase 9, mitochondrial,Acyl-coenzyme A thioesterase 10, mitochondrial              |
| SLDIcHPQER + Carbamidomethyl (C)            | 1253.5823 | 1253.5866 | +2;+3 | 62.0 | Q9R0X4,Q32MW3 | Acyl-coenzyme A thioesterase 9, mitochondrial,Acyl-coenzyme A thioesterase 10, mitochondrial              |
| QAYESNLicHGLQLEATR + Carbamidomethyl (C)    | 2102.0215 | 2102.0408 | 3     | 63.0 | Q6P9J9        | Anoctamin-6                                                                                               |
| VAASYGNAVcIFPLGVNSHKR + Carbamidomethyl (C) | 2388.2008 | 2388.2223 | 4     | 62.0 | Q8BPN8        | DmX-like protein 2                                                                                        |
| VAFcGAVEEGR + Carbamidomethyl (C)           | 1193.5499 | 1193.5611 | 2     | 62.0 | Q57119        | Aldehyde dehydrogenase family 16 member A1                                                                |
| FHcSLELNYPK + Carbamidomethyl (C)           | 1519.7493 | 1519.7613 | 3     | 62.0 | Q9QWR8        | Alpha-N-acetylgalactosaminidase                                                                           |
| TDTVILcR + Carbamidomethyl (C)              | 1089.5852 | 1089.5972 | 2     | 61.0 | Q9CXW3        | Calcyclin-binding protein                                                                                 |
| SSSEEAScYRR + Carbamidomethyl (C)           | 1330.5571 | 1330.5668 | 2     | 34.0 | P0C8K7        | Small integral membrane protein 1                                                                         |
| VLEAcSIACNKNTcPGDK + 3 Carbamidomethyl (C)  | 2103.9387 | 2103.9563 | 3     | 59.0 | P50431        | Serine hydroxymethyltransferase, cytosolic                                                                |
| cVVSEAGK + Carbamidomethyl (C)              | 848.4062  | 848.4121  | 2     | 57.0 | Q61074        | Protein phosphatase 1G                                                                                    |
| IAIVNHDKcKPK + Carbamidomethyl (C)          | 1421.7813 | 1421.79   | 3     | 37.0 | P61222        | ATP-binding cassette sub-family E member 1                                                                |

|                                                |           |           |       |      |                             |                                                                                                                                                                                                                        |
|------------------------------------------------|-----------|-----------|-------|------|-----------------------------|------------------------------------------------------------------------------------------------------------------------------------------------------------------------------------------------------------------------|
| TQAIvcQQLDLTHLKER + Carbamidomethyl (C)        | 2052.0786 | 2052.0822 | +3;+4 | 58.0 | P61222                      | ATP-binding cassette sub-family E member 1                                                                                                                                                                             |
| VIFDTGSANLWVPSKcSR + Carbamidomethyl (C)       | 2137.0626 | 2137.09   | 3     | 56.0 | P00796                      | Renin-2                                                                                                                                                                                                                |
| PGGLLLGDEAPNFEANTTIGRI R                       | 2410.2605 | 2410.2879 | 3     | 56.0 | O08709                      | Peroxisredoxin-6                                                                                                                                                                                                       |
| ELAGHTGYLScCR + 2 Carbamidomethyl (C)          | 1590.6919 | 1590.7039 | +2;+3 | 77.0 | P62874                      | Guanine nucleotide-binding protein G(I)/G(S)/G(T) subunit beta-1                                                                                                                                                       |
| cLIAGER + Carbamidomethyl (C)                  | 817.4116  | 817.4146  | 2     | 51.0 | Q61165                      | Sodium/hydrogen exchanger 1                                                                                                                                                                                            |
| KcLIAGER + Carbamidomethyl (C)                 | 945.5066  | 945.5128  | 2     | 47.0 | Q61165                      | Sodium/hydrogen exchanger 1                                                                                                                                                                                            |
| LSPDQcR + Carbamidomethyl (C)                  | 874.3967  | 874.4013  | 2     | 54.0 | Q8R146                      | Acylamino-acid-releasing enzyme                                                                                                                                                                                        |
| LVAcCRR + Carbamidomethyl (C)                  | 876.4422  | 876.463   | 2     | 53.0 | B1AS42                      | NADH-cytochrome b5 reductase-like                                                                                                                                                                                      |
| IACDFSLQK + Carbamidomethyl (C)                | 1193.6114 | 1193.6233 | 2     | 53.0 | P11983                      | T-complex protein 1 subunit alpha                                                                                                                                                                                      |
| MLPDKcR + Carbamidomethyl (C)                  | 1033.4685 | 1033.4732 | +2;+3 | 59.0 | P18760                      | Cofilin-1                                                                                                                                                                                                              |
| TVAACDLLQGLLHKDQR + Carbamidomethyl (C)        | 1937.0153 | 1937.0241 | +3;+4 | 69.0 | Q9QZ55                      | Serine/threonine-protein kinase Sgk2                                                                                                                                                                                   |
| LLQQLFSIP                                      | 1057.6172 | 1057.598  | 2     | 47.0 | Q1EG27                      | Myosin-IIIb                                                                                                                                                                                                            |
| ScATFSSSHRYHK + Carbamidomethyl (C)            | 1566.6998 | 1566.7059 | 3     | 37.0 | Q3UPL0                      | Protein transport protein Sec31A                                                                                                                                                                                       |
| TALVANTSMPVAAR                                 | 1514.7875 | 1514.7923 | 2     | 69.0 | P50516                      | V-type proton ATPase catalytic subunit A                                                                                                                                                                               |
| TcEDWVDGISQFKQLPEGNicR + 2 Carbamidomethyl (C) | 2719.237  | 2719.2651 | 3     | 44.0 | Q8R164                      | Valacyclovir hydrolase                                                                                                                                                                                                 |
| AAcLcFR + 2 Carbamidomethyl (C)                | 964.4259  | 964.4307  | 2     | 47.0 | P0C027,P0C028,Q8R2U6,Q9JI46 | Diphosphoinositol polyphosphate phosphohydrolase 3-alpha,Diphosphoinositol polyphosphate phosphohydrolase 3-beta,Diphosphoinositol polyphosphate phosphohydrolase 2,Diphosphoinositol polyphosphate phosphohydrolase 1 |
| NYVVTDHGScVR + Carbamidomethyl (C)             | 1405.6409 | 1405.6566 | 2     | 43.0 | Q01279                      | Epidermal growth factor receptor                                                                                                                                                                                       |
| SITNTTVcTK + Carbamidomethyl (C)               | 1123.5543 | 1123.5629 | 2     | 41.0 | Q64213                      | Splicing factor 1                                                                                                                                                                                                      |
| VAQATcKL + Carbamidomethyl (C)                 | 889.4691  | 889.4705  | 2     | 48.0 | P38060                      | Hydroxymethylglutaryl-CoA lyase, mitochondrial                                                                                                                                                                         |
| SIQcLTVHR + Carbamidomethyl (C)                | 1112.5761 | 1112.5813 | +2;+3 | 78.0 | O88342                      | WD repeat-containing protein 1                                                                                                                                                                                         |
| EcEQALAAEPK + Carbamidomethyl (C)              | 1244.5707 | 1244.544  | 2     | 44.0 | Q9D8N0                      | Elongation factor 1-gamma                                                                                                                                                                                              |

|                                                              |           |           |       |      |        |                                                                                                          |
|--------------------------------------------------------------|-----------|-----------|-------|------|--------|----------------------------------------------------------------------------------------------------------|
| PLIKPQGR                                                     | 907.5603  | 907.5704  | 2     | 53.0 | P48758 | Carbonyl reductase [NADPH] 1                                                                             |
| DEEDccGccGYENYGKR + 4<br>Carbamidomethyl (C)                 | 2170.7449 | 2170.7667 | 3     | 40.0 | Q64302 | Transmembrane 4 L6 family member 1                                                                       |
| ELFCVCGALK                                                   | 1081.53   | 1081.5292 | 2     | 39.0 | Q8BG81 | Polymerase delta-interacting protein 3                                                                   |
| SKGEVIQATSK                                                  | 1146.6244 | 1146.653  | 2     | 39.0 | A7TZF3 | Selection and upkeep of intraepithelial T-cells protein 4                                                |
| NAGQTcVcSNRFLVQR + 2<br>Carbamidomethyl (C)                  | 1908.9047 | 1908.9293 | 3     | 42.0 | Q8BWF0 | Succinate-semialdehyde dehydrogenase, mitochondrial                                                      |
| REAQLAALQ                                                    | 998.5509  | 998.5588  | 2     | 39.0 | Q8BVU0 | Leucine-rich repeat and calponin homology domain-containing protein 3                                    |
| TNPTEPVGVVcR +<br>Carbamidomethyl (C)                        | 1327.6555 | 1327.669  | 2     | 38.0 | Q91YN5 | UDP-N-acetylhexosamine pyrophosphorylase                                                                 |
| YHTVNGHNcEVRK +<br>Carbamidomethyl (C)                       | 1612.7529 | 1612.7563 | +3;+4 | 32.0 | P49312 | Heterogeneous nuclear ribonucleoprotein A1                                                               |
| RYFecQAK +<br>Carbamidomethyl (C)                            | 1100.5073 | 1100.5142 | 2     | 36.0 | Q9D1E6 | Tubulin-folding cofactor B                                                                               |
| CVDEGLEPTcFER +<br>Carbamidomethyl (C)                       | 1553.649  | 1553.6998 | 2     | 36.0 | Q8K2I3 | Dimethylaniline monooxygenase [N-oxide forming] 2                                                        |
| SIIGVIPYFPYSKQcK +<br>Carbamidomethyl (C)                    | 1898.9964 | 1899.0171 | 3     | 35.0 | Q8R574 | Phosphoribosyl pyrophosphate synthase-associated protein 2                                               |
| QQWALVEFEKPVTCPR +<br>Carbamidomethyl (C)                    | 1986.9986 | 1987.0199 | 3     | 35.0 | Q9JHW4 | Selenocysteine-specific elongation factor                                                                |
| ILVPEGTRDVPVGSIIcITVEKPKQ<br>DIEAFK + Carbamidomethyl<br>(C) | 3322.7847 | 3322.8192 | 4     | 35.0 | Q8BMF4 | Dihydrolipoyllysine-residue acetyltransferase component of pyruvate dehydrogenase complex, mitochondrial |
| QLSEIISERDTLL                                                | 1515.8144 | 1515.8694 | 2     | 34.0 | Q810N9 | Coiled-coil domain-containing protein 172                                                                |
| GQRLcQPKPK +<br>Carbamidomethyl (C)                          | 1210.6604 | 1210.6663 | 3     | 34.0 | P47915 | 60S ribosomal protein L29                                                                                |
| HHPDLIFcR +<br>Carbamidomethyl (C)                           | 1193.5764 | 1193.5896 | 3     | 51.0 | P83870 | PHD finger-like domain-containing protein 5A                                                             |
| ETSISScKTSLQR +<br>Carbamidomethyl (C)                       | 1495.73   | 1495.7434 | 2     | 34.0 | Q8BKX6 | Serine/threonine-protein kinase SMG1                                                                     |
| EAQAVYRQLLLGR                                                | 1515.8521 | 1515.8617 | +2;+3 | 36.0 | Q9Z268 | RasGAP-activating-like protein 1                                                                         |

|                                                                 |           |           |          |       |               |                                                       |
|-----------------------------------------------------------------|-----------|-----------|----------|-------|---------------|-------------------------------------------------------|
| cDLcGcR + 3<br>Carbamidomethyl (C)                              | 1075.3885 | 1075.4013 | 2        | 33.0  | P25801        | Rhombotin-2                                           |
| TTNHQGPLSKDPL                                                   | 1406.7154 | 1406.6803 | 2        | 32.0  | P97306        | SH3 and cysteine-rich domain-containing protein       |
| AGAIAPcEVTVPAQNTGLGPE<br>KTSFFQALGITTK +<br>Carbamidomethyl (C) | 3473.7865 | 3473.851  | 3        | 74.0  | P14869        | 60S acidic ribosomal protein P0                       |
| TNGSSPLLVAAWGAcTLTR +<br>Carbamidomethyl (C)                    | 1973.9993 | 1974.0232 | 3        | 30.0  | Q9CZ42        | ATP-dependent (S)-NAD(P)H-hydrate dehydratase         |
| EAIIVScVFVHQTLHQANAR +<br>Carbamidomethyl (C)                   | 2293.1386 | 2293.1544 | +3;+4    | 79.0  | Q9JHU4        | Cytoplasmic dynein 1 heavy chain 1                    |
| STKPQAEQPPASPEALRGcG<br>AAK + Carbamidomethyl (C)               | 2478.2285 | 2478.2329 | 4        | 30.0  | Q9WU79        | Proline dehydrogenase 1, mitochondrial                |
| APVIFSHSSAYSLcPHRR +<br>Carbamidomethyl (C)                     | 2084.0374 | 2084.0437 | +3;+4    | 40.0  | P31428        | Dipeptidase 1                                         |
| NcPHIVVGTGPRILALAR +<br>Carbamidomethyl (C)                     | 1943.0887 | 1943.1139 | 3        | 32.0  | Q9Z1N5        | Spliceosome RNA helicase Ddx39b                       |
| AKPHcSRNPVLVR +<br>Carbamidomethyl (C)                          | 1532.8358 | 1532.8401 | 4        | 37.0  | P47911        | 60S ribosomal protein L6                              |
| FLHDPSATQGFVG                                                   | 1374.6568 | 1374.6717 | 2        | 74.0  | P17563,Q63836 | Selenium-binding protein 1,Selenium-binding protein 2 |
| cSYDEHAK +<br>Carbamidomethyl (C)                               | 1008.3971 | 1008.4001 | +2;+3    | 61.0  | P07724        | Serum albumin                                         |
| LQTCcDKPLLK +<br>Carbamidomethyl (C)                            | 1317.6785 | 1317.6916 | +2;+3    | 93.0  | P07724        | Serum albumin                                         |
| YMCENQATISSK                                                    | 1373.5955 | 1373.5978 | 2        | 102.0 | P07724        | Serum albumin                                         |
| LQTCcDKPLLLK +<br>Carbamidomethyl (C)                           | 1445.7734 | 1445.7708 | +2;+3;+4 | 86.0  | P07724        | Serum albumin                                         |
| IAFSQYLQKCSYDEHAK                                               | 2029.9567 | 2029.9729 | 3        | 96.0  | P07724        | Serum albumin                                         |
| RALALGGTcTGEHIGLGLK +<br>Carbamidomethyl (C)                    | 1866.9734 | 1866.9891 | +3;+4    | 100.0 | Q7TNG8        | Probable D-lactate dehydrogenase, mitochondrial       |
| DSGLWFPVDPGADASLcGMA<br>ATGASGTNAVR +<br>Carbamidomethyl (C)    | 3050.3862 | 3050.3659 | 3        | 79.0  | Q7TNG8        | Probable D-lactate dehydrogenase, mitochondrial       |
| LTGAIVGHVGDGNFHCILLVDP<br>DDAEQR +<br>Carbamidomethyl (C)       | 3302.6102 | 3302.6542 | +3;+4    | 56.0  | Q7TNG8        | Probable D-lactate dehydrogenase, mitochondrial       |
| LQIPVncPYR +<br>Carbamidomethyl (C)                             | 1258.6492 | 1258.6621 | 2        | 58.0  | P24270        | Catalase                                              |
| LGPNYLQIPVncPYR                                                 | 1745.8923 | 1745.902  | 2        | 99.0  | P24270        | Catalase                                              |
| NPQVcPYNLYAEQLSGSAFTcP<br>R + 2 Carbamidomethyl (C)             | 2739.2421 | 2739.269  | +2;+3    | 128.0 | O09173        | Homogentisate 1,2-dioxygenase                         |
| GICGQTR                                                         | 733.3541  | 733.3585  | 2        | 43.0  | Q91V76        | Ester hydrolase C11orf54 homolog                      |
| GICGQTR +<br>Carbamidomethyl (C)                                | 790.3756  | 790.3795  | 2        | 46.0  | Q91V76        | Ester hydrolase C11orf54 homolog                      |
| cALLANLFASEQPGK +<br>Carbamidomethyl (C)                        | 1674.8399 | 1674.8587 | 2        | 100.0 | Q91V76        | Ester hydrolase C11orf54 homolog                      |
| NANSLGGGFHCWTcDVR +<br>Carbamidomethyl (C)                      | 1960.8309 | 1960.8493 | +2;+3    | 131.0 | Q9D964        | Glycine amidinotransferase, mitochondrial             |
| SPQcGECR +<br>Carbamidomethyl (C)                               | 1003.3851 | 1003.3919 | 2        | 42.0  | P00329        | Alcohol dehydrogenase 1                               |

|                                                         |           |           |          |       |               |                                                                                                           |
|---------------------------------------------------------|-----------|-----------|----------|-------|---------------|-----------------------------------------------------------------------------------------------------------|
| AVSCLWGK                                                | 862.4371  | 862.4412  | 2        | 38.0  | P02088        | Hemoglobin subunit beta-1                                                                                 |
| VITAFNDGLNHLDSLK                                        | 1755.9155 | 1755.9195 | 3        | 57.0  | P02088        | Hemoglobin subunit beta-1                                                                                 |
| VHLTDAEKAASVSLWGK                                       | 1826.9349 | 1826.9555 | +2;+3;+4 | 139.0 | P02088        | Hemoglobin subunit beta-1                                                                                 |
| GYLGPQLPDCLKGCDVVVIPA<br>GVPR                           | 2694.3873 | 2694.394  | 3        | 112.0 | P08249        | Malate dehydrogenase, mitochondrial                                                                       |
| GYLGPQLPDCLKGcDVVVIPA<br>GVPR + Carbamidomethyl (C)     | 2751.4088 | 2819.4471 | 3        | 96.0  | P08249        | Malate dehydrogenase, mitochondrial                                                                       |
| QTANVLSGACGLHRGDR                                       | 1753.8642 | 1753.8791 | +2;+3;+4 | 65.0  | Q8K0L3        | Acyl-coenzyme A synthetase ACSM2,<br>mitochondrial                                                        |
| TVHAITATQK                                              | 1068.5928 | 1068.5906 | +2;+3    | 74.0  | P16858        | Glyceraldehyde-3-phosphate<br>dehydrogenase                                                               |
| IVSNASCTTNCLAPLAK                                       | 1704.8539 | 1704.86   | 2        | 117.0 | P16858,Q64467 | Glyceraldehyde-3-phosphate<br>dehydrogenase,Glyceraldehyde-3-<br>phosphate dehydrogenase, testis-specific |
| KDLEQGVVGAHLLCR                                         | 1693.8934 | 1693.9029 | +2;+3;+4 | 145.0 | Q91253        | Glyoxylate reductase/hydroxypyruvate<br>reductase                                                         |
| KDLEQGVVGAHLLcR +<br>Carbamidomethyl (C)                | 1750.9148 | 1750.9228 | +3;+4    | 123.0 | Q91253        | Glyoxylate reductase/hydroxypyruvate<br>reductase                                                         |
| SSIGVVGTAEQNR                                           | 1316.6684 | 1316.6594 | 2        | 101.0 | O35215        | D-dopachrome decarboxylase                                                                                |
| LcAATATILDKPEDR +<br>Carbamidomethyl (C)                | 1672.8454 | 1672.8588 | +2;+3    | 109.0 | O35215        | D-dopachrome decarboxylase                                                                                |
| IPAGLENRLcAATATILDKPEDR<br>+ Carbamidomethyl (C)        | 2523.3115 | 2523.3317 | +3;+4    | 95.0  | O35215        | D-dopachrome decarboxylase                                                                                |
| IKEEGTGIELTGIGScEIANALSK<br>+ Carbamidomethyl (C)       | 2489.2683 | 2489.291  | +2;+3    | 149.0 | Q61838        | Pregnancy zone protein                                                                                    |
| VPGAFTPGcSK +<br>Carbamidomethyl (C)                    | 1119.5383 | 1119.5396 | 2        | 92.0  | P99029        | Peroxiredoxin-5, mitochondrial                                                                            |
| DVGGIVLANAcGPCIGQWDRK<br>+ Carbamidomethyl (C)          | 2296.1093 | 2296.1372 | +2;+3    | 99.0  | Q99K10        | Aconitate hydratase, mitochondrial                                                                        |
| DNGNGTYSYSVPR                                           | 1531.6362 | 1531.6511 | 2        | 121.0 | Q8BTM8        | Filamin-A                                                                                                 |
| DNGNGTYSYSVPR +<br>Carbamidomethyl (C)                  | 1588.6576 | 1588.6709 | 2        | 113.0 | Q8BTM8        | Filamin-A                                                                                                 |
| GAGTGGLGLTVEGPcEAQ +<br>Carbamidomethyl (C)             | 1672.7727 | 1672.8259 | 2        | 127.0 | Q8BTM8        | Filamin-A                                                                                                 |
| cSYQPTMEGVHTVHVFAGVP<br>IPR + Carbamidomethyl (C)       | 2682.3047 | 2682.3154 | +3;+4    | 106.0 | Q8BTM8        | Filamin-A                                                                                                 |
| LQVEPAVDTSGVQcYGPQIEG<br>QGVFR + Carbamidomethyl<br>(C) | 2762.3334 | 2762.3548 | 2        | 147.0 | Q8BTM8        | Filamin-A                                                                                                 |
| TVcIEKNETLGGTcLNVGcIPSK<br>+ 3 Carbamidomethyl (C)      | 2685.2812 | 2685.2708 | 3        | 89.0  | O08749        | Dihydrolipoyl dehydrogenase,<br>mitochondrial                                                             |
| VcHAHPTLSEAFREANLAAAFG<br>KPIN + Carbamidomethyl (C)    | 2820.4129 | 2820.4342 | 4        | 43.0  | O08749        | Dihydrolipoyl dehydrogenase,<br>mitochondrial                                                             |
| AQITNPSGASTEFCVK                                        | 1651.7876 | 1651.7967 | 2        | 112.0 | Q80X90        | Filamin-B                                                                                                 |
| GAGTGGLGLTVEGPcEAK +<br>Carbamidomethyl (C)             | 1672.8091 | 1672.8259 | 2        | 127.0 | Q80X90,Q8VHX6 | Filamin-B,Filamin-C                                                                                       |

|                                                   |           |           |       |       |        |                                                                   |
|---------------------------------------------------|-----------|-----------|-------|-------|--------|-------------------------------------------------------------------|
| AQITNPSGASTEcFVK + Carbamidomethyl (C)            | 1708.809  | 1708.8338 | 2     | 98.0  | Q80X90 | Filamin-B                                                         |
| HSSLAGcQIINYR + Carbamidomethyl (C)               | 1517.7409 | 1517.7531 | +2;+3 | 123.0 | Q68FD5 | Clathrin heavy chain 1                                            |
| GQCDLELINVcNENSLFK + Carbamidomethyl (C)          | 2162.9976 | 2163.0322 | 2     | 86.0  | Q68FD5 | Clathrin heavy chain 1                                            |
| GQcDLELINVcNENSLFK + 2 Carbamidomethyl (C)        | 2220.0191 | 2220.0522 | 2     | 89.0  | Q68FD5 | Clathrin heavy chain 1                                            |
| LCNPPVNAISPTVITEVR                                | 1922.0295 | 1922.0393 | 2     | 128.0 | Q9DBM2 | Peroxisomal bifunctional enzyme                                   |
| NGIcLEMGPQPQGVLR + Carbamidomethyl (C)            | 1767.876  | 1767.8865 | +2;+3 | 101.0 | Q91XE4 | N-acyl-aromatic-L-amino acid amidohydrolase (carboxylate-forming) |
| ScTLTFLGSTATPDDPYEVK + Carbamidomethyl (C)        | 2201.0198 | 2201.041  | +2;+3 | 132.0 | Q91XE4 | N-acyl-aromatic-L-amino acid amidohydrolase (carboxylate-forming) |
| PGLTALLSDHR                                       | 1178.6408 | 1178.6515 | 3     | 77.0  | Q91X72 | Hemopexin                                                         |
| SLPQPQKVNLSILGCSQ                                 | 1697.877  | 1697.891  | 2     | 36.0  | Q91X72 | Hemopexin                                                         |
| ELLTEFGYKGEETPVIVGSALcALEQR + Carbamidomethyl (C) | 3008.5165 | 3008.5588 | 3     | 117.0 | Q8BFR5 | Elongation factor Tu, mitochondrial                               |
| ASSTANLIFEDCR                                     | 1425.6558 | 1425.6597 | 2     | 124.0 | Q07417 | Short-chain specific acyl-CoA dehydrogenase, mitochondrial        |
| IGIASQALGIAQASLDcAVK + Carbamidomethyl (C)        | 1985.0615 | 1985.0843 | 3     | 102.0 | Q07417 | Short-chain specific acyl-CoA dehydrogenase, mitochondrial        |
| IGCFALSEPGNGSDAGAASTTAR                           | 2151.9855 | 2151.9952 | +2;+3 | 128.0 | Q07417 | Short-chain specific acyl-CoA dehydrogenase, mitochondrial        |
| IGcFALSEPGNGSDAGAASTTAR + Carbamidomethyl (C)     | 2209.007  | 2209.0376 | 2     | 148.0 | Q07417 | Short-chain specific acyl-CoA dehydrogenase, mitochondrial        |
| GcQLLVYPGAFNLTTGPAHWELLR + Carbamidomethyl (C)    | 2840.4432 | 2840.4762 | +2;+3 | 114.0 | Q9JHW2 | Omega-amidase NIT2                                                |
| AIVLDPcR + Carbamidomethyl (C)                    | 942.4957  | 942.4989  | 2     | 56.0  | A2ARV4 | Low-density lipoprotein receptor-related protein 2                |
| cGNHHCIPLR + Carbamidomethyl (C)                  | 1205.5546 | 1205.5627 | 3     | 43.0  | A2ARV4 | Low-density lipoprotein receptor-related protein 2                |
| YRCDGVYDcK + Carbamidomethyl (C)                  | 1277.5169 | 1277.5263 | 2     | 30.0  | A2ARV4 | Low-density lipoprotein receptor-related protein 2                |
| cNQFQFTcLNGR + 2 Carbamidomethyl (C)              | 1543.666  | 1543.6805 | 2     | 82.0  | A2ARV4 | Low-density lipoprotein receptor-related protein 2                |
| LQNVEcLSFDWISR + Carbamidomethyl (C)              | 1765.8457 | 1765.855  | 2     | 92.0  | A2ARV4 | Low-density lipoprotein receptor-related protein 2                |
| cGcAFGTLEDDGKNCATSR + 2 Carbamidomethyl (C)       | 2060.835  | 2060.8526 | 3     | 101.0 | A2ARV4 | Low-density lipoprotein receptor-related protein 2                |

|                                                            |           |           |       |       |               |                                                                        |
|------------------------------------------------------------|-----------|-----------|-------|-------|---------------|------------------------------------------------------------------------|
| VGLTNYAAAYCTGLLLAR                                         | 1868.9818 | 1868.9859 | +2;+3 | 101.0 | P47962        | 60S ribosomal protein L5                                               |
| VGLTNYAAAYcTGLLLARR + Carbamidomethyl (C)                  | 2082.1044 | 2082.1211 | 3     | 82.0  | P47962        | 60S ribosomal protein L5                                               |
| TDDYLDQPcCETINR + Carbamidomethyl (C)                      | 1909.7822 | 1909.805  | 2     | 84.0  | Q61598        | Rab GDP dissociation inhibitor beta                                    |
| FCLNPK                                                     | 720.3629  | 720.3638  | 2     | 44.0  | P28474,Q35516 | Alcohol dehydrogenase class-3,Neurogenic locus notch homolog protein 2 |
| LKAGDTVIPLYIPQcGEcK + Carbamidomethyl (C)                  | 2172.0959 | 2172.1167 | 3     | 69.0  | P28474        | Alcohol dehydrogenase class-3                                          |
| LKAGDTVIPLYIPQcGEcK + 2 Carbamidomethyl (C)                | 2229.1174 | 2229.132  | 3     | 49.0  | P28474        | Alcohol dehydrogenase class-3                                          |
| RALANSLAcQcK + Carbamidomethyl (C)                         | 1287.6717 | 1287.6784 | 2     | 64.0  | P05064        | Fructose-bisphosphate aldolase A                                       |
| YASicQQNGIVPIVEPEILPDGD HDLK + Carbamidomethyl (C)         | 3019.4961 | 3019.5175 | 3     | 126.0 | P05064,P05063 | Fructose-bisphosphate aldolase A,Fructose-bisphosphate aldolase C      |
| YASicQQNGIVPIVEPEILPDGD HDLKR + Carbamidomethyl (C)        | 3175.5972 | 3175.6342 | +3;+4 | 57.0  | P05064,P05063 | Fructose-bisphosphate aldolase A,Fructose-bisphosphate aldolase C      |
| LGAGLPiSTPCTTVNK                                           | 1570.8389 | 1570.852  | 2     | 48.0  | Q8QZT1        | Acetyl-CoA acetyltransferase, mitochondrial                            |
| LGAGLPiSTPcTTVnk + Carbamidomethyl (C)                     | 1627.8604 | 1627.8852 | 2     | 64.0  | Q8QZT1        | Acetyl-CoA acetyltransferase, mitochondrial                            |
| IVVHMAHALKPGFGLASicNG GGGASALLIEKL + Carbamidomethyl (C)   | 3429.8265 | 3429.8385 | +4;+5 | 82.0  | Q8QZT1        | Acetyl-CoA acetyltransferase, mitochondrial                            |
| IQENANALAR                                                 | 1098.5781 | 1098.5809 | 2     | 85.0  | Q91Y97        | Fructose-bisphosphate aldolase B                                       |
| YASICQQNGLVPIVEPEVLPDGD HDLcHcQYVSEK + Carbamidomethyl (C) | 4048.8823 | 4048.9013 | 4     | 66.0  | Q91Y97        | Fructose-bisphosphate aldolase B                                       |
| IPEWWLANVAcLR + Carbamidomethyl (C)                        | 1626.834  | 1626.8515 | 2     | 97.0  | Q3UNX5        | Acyl-coenzyme A synthetase ACSM3, mitochondrial                        |
| KTGLDIYEGYQTETVLIcGNFK + Carbamidomethyl (C)               | 2605.2734 | 2605.289  | 3     | 53.0  | Q3UNX5        | Acyl-coenzyme A synthetase ACSM3, mitochondrial                        |
| SVAADFIQQGIRcNCVcPGTVD TPSLQER + 2 Carbamidomethyl (C)     | 3220.5064 | 3220.5445 | 3     | 95.0  | Q8JZV9        | 3-hydroxybutyrate dehydrogenase type 2                                 |
| YcVTEPSAGSDVAAIK + Carbamidomethyl (C)                     | 1666.7872 | 1666.8083 | 2     | 105.0 | P45952        | Medium-chain specific acyl-CoA dehydrogenase, mitochondrial            |

|                                                    |           |           |          |       |               |                                                                      |
|----------------------------------------------------|-----------|-----------|----------|-------|---------------|----------------------------------------------------------------------|
| cAYCVTEPSAGSDVAAIK + Carbamidomethyl (C)           | 1908.8597 | 1908.868  | 2        | 95.0  | P45952        | Medium-chain specific acyl-CoA dehydrogenase, mitochondrial          |
| IFTLPGNCLIYPAHDYHGLTVSTVEEER                       | 3173.5492 | 3173.5804 | +2;+3;+4 | 102.0 | Q9DCM0        | Persulfide dioxygenase ETHE1, mitochondrial                          |
| YVDIAIPcNNK + Carbamidomethyl (C)                  | 1305.6387 | 1305.6439 | 2        | 75.0  | P14206        | 40S ribosomal protein SA                                             |
| cLLWFcGMSK + 2 Carbamidomethyl (C)                 | 1300.5767 | 1300.5769 | 2        | 57.0  | Q92317        | Sodium/glucose cotransporter 2                                       |
| VcGTEVGCsNIAYPR + Carbamidomethyl (C)              | 1692.76   | 1692.7761 | 2        | 128.0 | Q92317        | Sodium/glucose cotransporter 2                                       |
| STCTYVGAAK                                         | 999.4695  | 999.462   | 2        | 60.0  | Q9DCZ1,Q99L27 | GMP reductase 1,GMP reductase 2                                      |
| TKTGVGYPQLSAVIECADSAHGLK                           | 2444.237  | 2444.2601 | 3        | 100.0 | Q9DCZ1        | GMP reductase 1                                                      |
| LLQDSGAPDGLTlnIIHGQHDAVNFICDHPDIK                  | 3452.6783 | 3452.7268 | +3;+4;+5 | 124.0 | Q9EQ20        | Methylmalonate-semialdehyde dehydrogenase [acylating], mitochondrial |
| GcTATLGNFAK + Carbamidomethyl (C)                  | 1138.5441 | 1138.5452 | 2        | 89.0  | P25444        | 40S ribosomal protein S2                                             |
| AGIDDCYTSAR                                        | 1170.4975 | 1170.4979 | 2        | 97.0  | P25444        | 40S ribosomal protein S2                                             |
| HIDcASVYGNETEIGEALK + Carbamidomethyl (C)          | 2104.9735 | 2105.004  | +2;+3    | 169.0 | Q9JII6        | Alcohol dehydrogenase [NADP(+)]                                      |
| HIDcASVYGNETEIGEALKESVGSgK + Carbamidomethyl (C)   | 2749.2865 | 2749.3001 | +3;+4    | 166.0 | Q9JII6        | Alcohol dehydrogenase [NADP(+)]                                      |
| LVILANNcPALR + Carbamidomethyl (C)                 | 1352.7598 | 1352.7616 | 2        | 104.0 | P62889        | 60S ribosomal protein L30                                            |
| AHSNLcVNQIVR + Carbamidomethyl (C)                 | 1409.7198 | 1409.7195 | 3        | 58.0  | Q9JHI5        | Isovaleryl-CoA dehydrogenase, mitochondrial                          |
| GSNTCELVFEDcKvPAANVLSQESK + Carbamidomethyl (C)    | 2792.2997 | 2792.3244 | 3        | 87.0  | Q9JHI5        | Isovaleryl-CoA dehydrogenase, mitochondrial                          |
| NTYGTGcFLLcNTGhK + Carbamidomethyl (C)             | 1852.8237 | 1852.8349 | +2;+3    | 76.0  | Q64516        | Glycerol kinase                                                      |
| TSLARPCiAR                                         | 1086.5968 | 1086.6068 | 3        | 36.0  | P16460        | Argininosuccinate synthase                                           |
| YLLGTSLARPCiAR                                     | 1532.8497 | 1532.8585 | +2;+3    | 62.0  | P16460        | Argininosuccinate synthase                                           |
| YLLGTSLARPCiAR + Carbamidomethyl (C)               | 1589.8712 | 1589.8774 | +2;+3    | 64.0  | P16460        | Argininosuccinate synthase                                           |
| EGGGGITCVLQDGR                                     | 1360.6405 | 1360.6518 | 2        | 119.0 | P36552        | Oxygen-dependent coproporphyrinogen-III oxidase, mitochondrial       |
| TNHIGHTGYLNTVTVSPDGSLC ASGGK                       | 2685.2817 | 2685.3054 | +3;+4    | 126.0 | P68040        | Receptor of activated protein C kinase 1                             |
| AEPPQcTSLAWSADGQTLFAGYTDNLVR + Carbamidomethyl (C) | 3067.4346 | 3067.4785 | 3        | 50.0  | P68040        | Receptor of activated protein C kinase 1                             |
| ASGGVGLATcQiAR + Carbamidomethyl (C)               | 1359.6929 | 1359.7074 | 2        | 82.0  | P47199        | Quinone oxidoreductase                                               |
| KPIGLcCIAPVL + Carbamidomethyl (C)                 | 1350.7403 | 1350.7561 | 2        | 64.0  | Q9D172        | ES1 protein homolog, mitochondrial                                   |
| LPCILNAR                                           | 898.5058  | 898.5087  | 2        | 70.0  | P16125        | L-lactate dehydrogenase B chain                                      |



|                                                 |           |           |          |       |        |                                               |
|-------------------------------------------------|-----------|-----------|----------|-------|--------|-----------------------------------------------|
| LPcILNAR + Carbamidomethyl (C)                  | 955.5273  | 955.5295  | 2        | 60.0  | P16125 | L-lactate dehydrogenase B chain               |
| HRVIGSGCNLDSAR                                  | 1483.7314 | 1483.7281 | 3        | 95.0  | P16125 | L-lactate dehydrogenase B chain               |
| LLcGGGAAADRGYFIQPTVFG DVK + Carbamidomethyl (C) | 2511.2581 | 2511.2787 | 3        | 48.0  | P47738 | Aldehyde dehydrogenase, mitochondrial         |
| AVPAPNHQPEVFCNQIFINNE WHDAVSR                   | 3231.5308 | 3231.5647 | +3;+4    | 105.0 | P47738 | Aldehyde dehydrogenase, mitochondrial         |
| VC EEIAIIPSKK                                   | 1328.7373 | 1328.7433 | +2;+3    | 119.0 | P63276 | 40S ribosomal protein S17                     |
| Vc EEIAIIPSKK + Carbamidomethyl (C)             | 1385.7588 | 1385.7626 | +2;+3    | 103.0 | P63276 | 40S ribosomal protein S17                     |
| ACQSIYPLHDVVFVRK                                | 1774.9189 | 1774.9351 | +2;+3;+4 | 57.0  | P97351 | 40S ribosomal protein S3a                     |
| EQWNSCPTIGQIR                                   | 1530.7249 | 1530.7334 | 2        | 77.0  | P10605 | Cathepsin B                                   |
| cPFTGNVSIR + Carbamidomethyl (C)                | 1149.5601 | 1149.5649 | 2        | 71.0  | P62281 | 40S ribosomal protein S11                     |
| ILcGEGVDQLSLPLR + Carbamidomethyl (C)           | 1668.8869 | 1668.89   | 2        | 100.0 | Q8BH00 | Aldehyde dehydrogenase family 8 member A1     |
| YCQVIR                                          | 780.3952  | 780.4002  | 2        | 32.0  | P27659 | 60S ribosomal protein L3                      |
| KVACIGAWHPAR                                    | 1307.6921 | 1307.6906 | 3        | 90.0  | P27659 | 60S ribosomal protein L3                      |
| GGNASNSCTVLSLLGAR                               | 1618.8097 | 1618.8242 | 2        | 128.0 | P97328 | Ketohexokinase                                |
| IFSGcNIENACYPLGVcAER + 2 Carbamidomethyl (C)    | 2408.0599 | 2408.0744 | 2        | 124.0 | P56389 | Cytidine deaminase                            |
| GEGMSQAATICR                                    | 1222.5434 | 1222.553  | 2        | 89.0  | P35505 | Fumarylacetoacetase                           |
| VNQAIWLLcTGAR + Carbamidomethyl (C)             | 1500.7871 | 1500.7985 | +2;+3    | 69.0  | P97461 | 40S ribosomal protein S5                      |
| RVNQAIWLLcTGAR                                  | 1599.8667 | 1599.8749 | +2;+3    | 102.0 | P97461 | 40S ribosomal protein S5                      |
| HNADFcYK + Carbamidomethyl (C)                  | 1053.4338 | 1053.4405 | 2        | 56.0  | Q64442 | Sorbitol dehydrogenase                        |
| ATPPDDGNLCR                                     | 1157.5135 | 1157.5239 | 2        | 39.0  | Q64442 | Sorbitol dehydrogenase                        |
| YNLTPTIFFcATPPDDGNLCRF + Carbamidomethyl (C)    | 2561.1719 | 2561.1416 | 3        | 33.0  | Q64442 | Sorbitol dehydrogenase                        |
| SLPAGSLISLHIYALHR                               | 1847.0417 | 1847.0421 | +3;+4    | 90.0  | Q64462 | Cytochrome P450 4B1                           |
| YcTDTSIIFR + Carbamidomethyl (C)                | 1274.5965 | 1274.5953 | 2        | 63.0  | Q11136 | Xaa-Pro dipeptidase                           |
| DANGYcIK + Carbamidomethyl (C)                  | 939.412   | 939.4139  | 2        | 30.0  | O35488 | Very long-chain acyl-CoA synthetase           |
| GEVGLLVcK + Carbamidomethyl (C)                 | 973.5267  | 973.5297  | 2        | 57.0  | O35488 | Very long-chain acyl-CoA synthetase           |
| GEVGLLVcKITQLTPFIGYAGGK + Carbamidomethyl (C)   | 2420.3138 | 2420.3418 | 3        | 63.0  | O35488 | Very long-chain acyl-CoA synthetase           |
| cVNNTLQIK + Carbamidomethyl (C)                 | 1075.5696 | 1075.5771 | 2        | 62.0  | P40124 | Adenylyl cyclase-associated protein 1         |
| GQKIPIFSAAGLPHNEIAAQICR                         | 2433.295  | 2433.314  | +3;+4    | 106.0 | P62814 | V-type proton ATPase subunit B, brain isoform |
| STTTIGLVQALGAHLRQNVFAC VR                       | 2554.3802 | 2554.4033 | +3;+4    | 115.0 | Q922D8 | C-1-tetrahydrofolate synthase, cytoplasmic    |
| TSYPDCK                                         | 925.4215  | 925.422   | 2        | 56.0  | Q92111 | Serotransferrin                               |

|                                                               |           |           |       |       |                                                              |                                                                                                                                                                                                                                                                                          |
|---------------------------------------------------------------|-----------|-----------|-------|-------|--------------------------------------------------------------|------------------------------------------------------------------------------------------------------------------------------------------------------------------------------------------------------------------------------------------------------------------------------------------|
| NLEAVETLGSTSTICSDKTGLT<br>QNR                                 | 2738.3392 | 2738.3507 | 3     | 148.0 | Q8VDN2,Q6PIE5,<br>Q6PIC6,Q9WV27                              | Sodium/potassium-transporting ATPase subunit alpha-1,Sodium/potassium-transporting ATPase subunit alpha-2,Sodium/potassium-transporting ATPase subunit alpha-3,Sodium/potassium-transporting ATPase subunit alpha-4                                                                      |
| EIIAVScGPSQcQETIR +<br>Carbamidomethyl (C)                    | 1957.9237 | 1957.9362 | 2     | 124.0 | Q9DCW4                                                       | Electron transfer flavoprotein subunit beta                                                                                                                                                                                                                                              |
| EIIAVScGPSQcQETIR + 2<br>Carbamidomethyl (C)                  | 2014.9452 | 2014.9676 | 2     | 131.0 | Q9DCW4                                                       | Electron transfer flavoprotein subunit beta                                                                                                                                                                                                                                              |
| SVSTAcTTGAHAVGDSFR +<br>Carbamidomethyl (C)                   | 1822.8268 | 1822.8382 | 3     | 94.0  | Q9D404                                                       | 3-oxoacyl-[acyl-carrier-protein] synthase, mitochondrial                                                                                                                                                                                                                                 |
| EMIDRIPcGR +<br>Carbamidomethyl (C)                           | 1245.5958 | 1245.5962 | +2;+3 | 50.0  | Q9CQ62                                                       | 2,4-dienoyl-CoA reductase, mitochondrial                                                                                                                                                                                                                                                 |
| FRCPEALFQPSFLGMEScGIHET<br>TFNSIMK + 2<br>Carbamidomethyl (C) | 3601.6502 | 3601.6807 | 3     | 72.0  | P60710,P63260                                                | Actin, cytoplasmic 1,Actin, cytoplasmic 2                                                                                                                                                                                                                                                |
| AFVDScLQLHETKR +<br>Carbamidomethyl (C)                       | 1702.8461 | 1702.8613 | +3;+4 | 80.0  | P51174                                                       | Long-chain specific acyl-CoA dehydrogenase, mitochondrial                                                                                                                                                                                                                                |
| NLDKEYLPIGGLAEFCK                                             | 1908.9655 | 1908.9741 | +2;+3 | 132.0 | P05202                                                       | Aspartate aminotransferase, mitochondrial                                                                                                                                                                                                                                                |
| cMYTNTPEHFILDcHPK + 2<br>Carbamidomethyl (C)                  | 2344.9915 | 2344.9975 | +3;+4 | 86.0  | Q9D826                                                       | Peroxisomal sarcosine oxidase                                                                                                                                                                                                                                                            |
| TFSDIQDVQILcHFVRDHLPLGL<br>R + Carbamidomethyl (C)            | 2765.4072 | 2765.433  | +4;+5 | 50.0  | Q9D826                                                       | Peroxisomal sarcosine oxidase                                                                                                                                                                                                                                                            |
| CVVVG DGAVGK                                                  | 1002.5168 | 1002.5148 | 2     | 79.0  | P60766,Q8R527,P<br>63001,P84096,P6<br>0764,Q05144,Q9E<br>R71 | Cell division control protein 42 homolog,Rho-related GTP-binding protein RhoQ,Ras-related C3 botulinum toxin substrate 1,Rho-related GTP-binding protein RhoG,Ras-related C3 botulinum toxin substrate 3,Ras-related C3 botulinum toxin substrate 2,Rho-related GTP-binding protein RhoJ |

|                                                        |           |           |       |       |               |                                                                               |
|--------------------------------------------------------|-----------|-----------|-------|-------|---------------|-------------------------------------------------------------------------------|
| YVECSALTQK                                             | 1140.5485 | 1140.5591 | 2     | 76.0  | P60766,Q8R527 | Cell division control protein 42 homolog,Rho-related GTP-binding protein RhoQ |
| cPLSGAcYSPEFK + 2 Carbamidomethyl (C)                  | 1582.6796 | 1582.6906 | 2     | 77.0  | Q8CIE6        | Coatomer subunit alpha                                                        |
| STLTDSLCK                                              | 1065.5376 | 1065.5416 | 2     | 75.0  | P58252        | Elongation factor 2                                                           |
| GLESTTLADKDGIEYCK                                      | 1841.8717 | 1841.8945 | +2;+3 | 141.0 | P97315        | Cysteine and glycine-rich protein 1                                           |
| AALCTELK                                               | 847.4473  | 847.4517  | 2     | 56.0  | Q3UNZ8        | Quinone oxidoreductase-like protein 2                                         |
| AALcTELKQPLTIQEVAPRPVG PQEVR + Carbamidomethyl (C)     | 2999.6226 | 2999.6454 | +3;+4 | 82.0  | Q3UNZ8        | Quinone oxidoreductase-like protein 2                                         |
| GISCIVVEK                                              | 946.5157  | 946.5172  | 2     | 57.0  | Q9D7B6        | Isobutyryl-CoA dehydrogenase, mitochondrial                                   |
| CIDPSLGLNEEQK                                          | 1444.6868 | 1444.6958 | 2     | 98.0  | Q9D7B6        | Isobutyryl-CoA dehydrogenase, mitochondrial                                   |
| cIDPSLGLNEEQK + Carbamidomethyl (C)                    | 1501.7082 | 1501.712  | 2     | 99.0  | Q9D7B6        | Isobutyryl-CoA dehydrogenase, mitochondrial                                   |
| SAVSLWAKVNPDEVGGEALGR                                  | 2257.1161 | 2257.1341 | 3     | 101.0 | P02089        | Hemoglobin subunit beta-2                                                     |
| IYGGSVTGATCK                                           | 1268.6435 | 1268.646  | 2     | 126.0 | P17751        | Triosephosphate isomerase                                                     |
| VSHALAEGLGVIACIGEK                                     | 1765.9396 | 1765.9428 | +2;+3 | 116.0 | P17751        | Triosephosphate isomerase                                                     |
| cSNEPVGPSIAALTSEER + Carbamidomethyl (C)               | 1915.8945 | 1915.9105 | 2     | 155.0 | Q9DC50        | Peroxisomal carnitine O-octanoyltransferase                                   |
| IPSQLNVNFVGPcPHFEHYWP AR + Carbamidomethyl (C)         | 2764.3333 | 2764.3095 | 4     | 30.0  | Q9DC50        | Peroxisomal carnitine O-octanoyltransferase                                   |
| LGILGLCNTLAIIEGR                                       | 1541.8599 | 1541.8725 | 2     | 126.0 | P51660        | Peroxisomal multifunctional enzyme type 2                                     |
| NNIHcNTIAPNAGSR + Carbamidomethyl (C)                  | 1637.7692 | 1637.7668 | 3     | 69.0  | P51660        | Peroxisomal multifunctional enzyme type 2                                     |
| cFIVGADNVGSK + Carbamidomethyl (C)                     | 1265.6074 | 1265.6134 | 2     | 94.0  | P14869        | 60S acidic ribosomal protein P0                                               |
| AGAIAPCEVTVPAQNTGLGPEK                                 | 2122.0728 | 2122.0858 | +2;+3 | 117.0 | P14869        | 60S acidic ribosomal protein P0                                               |
| YNPNVLPVQCTGK                                          | 1431.718  | 1431.7296 | 2     | 87.0  | P14094        | Sodium/potassium-transporting ATPase subunit beta-1                           |
| YNPNVLPVQcTGK + Carbamidomethyl (C)                    | 1488.7395 | 1488.7512 | 2     | 48.0  | P14094        | Sodium/potassium-transporting ATPase subunit beta-1                           |
| AAGHTGPLHKCDIYQSK                                      | 1824.8941 | 1824.8891 | +3;+4 | 77.0  | P09470        | Angiotensin-converting enzyme                                                 |
| LcDSEAHVcFEGLDSDPTGTAY GASIPAR + 2 Carbamidomethyl (C) | 3276.4704 | 3276.511  | 3     | 128.0 | Q8R086        | Sulfite oxidase, mitochondrial                                                |

|                                                       |           |           |       |       |        |                                                                                                          |
|-------------------------------------------------------|-----------|-----------|-------|-------|--------|----------------------------------------------------------------------------------------------------------|
| RcEAFGWHTIIVDGHsVEELcK + 2 Carbamidomethyl (C)        | 2710.2632 | 2710.2721 | +4;+5 | 51.0  | P40142 | Transketolase                                                                                            |
| QAFTDVATGSLGQGLGAACG MAYTGKYFDK + Carbamidomethyl (C) | 3084.4321 | 3084.4417 | +3;+4 | 113.0 | P40142 | Transketolase                                                                                            |
| PICPVFR                                               | 830.4473  | 830.4503  | 2     | 65.0  | Q9Z2J0 | Solute carrier family 23 member 1                                                                        |
| ALDQVSGIPGcIFVHASGFIGG HHTR + Carbamidomethyl (C)     | 2732.3606 | 2732.3753 | +4;+5 | 57.0  | Q9JK81 | UPF0160 protein MYG1, mitochondrial                                                                      |
| DKALDQVSGIPGcIFVHASGFIGG HHTR + Carbamidomethyl (C)   | 2975.4825 | 2975.5023 | +4;+5 | 51.0  | Q9JK81 | UPF0160 protein MYG1, mitochondrial                                                                      |
| VYEEDAVPGLTPcR + Carbamidomethyl (C)                  | 1604.7505 | 1604.7604 | 2     | 98.0  | Q9CZ13 | Cytochrome b-c1 complex subunit 1, mitochondrial                                                         |
| NALVSHLDGTTpVcEDIGR + Carbamidomethyl (C)             | 2052.9899 | 2052.99   | 3     | 123.0 | Q9CZ13 | Cytochrome b-c1 complex subunit 1, mitochondrial                                                         |
| HLLPLVQcPTLIVHGKdPLVP R + Carbamidomethyl (C)         | 2630.4731 | 2630.4932 | +3;+4 | 64.0  | Q8R164 | Valacyclovir hydrolase                                                                                   |
| VAAELQAGTCYINNYNVPVEL PFGGYKK                         | 3144.559  | 3144.571  | 3     | 84.0  | Q9JLJ2 | 4-trimethylaminobutyraldehyde dehydrogenase                                                              |
| LKSYCNDQSTGDIK                                        | 1570.7297 | 1570.7743 | 2     | 63.0  | P00493 | Hypoxanthine-guanine phosphoribosyltransferase                                                           |
| GPLCLQEVEPPQHAlR                                      | 1900.9465 | 1900.9622 | 3     | 81.0  | P70296 | Phosphatidylethanolamine-binding protein 1                                                               |
| GDHYLcDvVWATEER + Carbamidomethyl (C)                 | 1848.8101 | 1848.8287 | +2;+3 | 116.0 | P28843 | Dipeptidyl peptidase 4                                                                                   |
| LCYLVK                                                | 737.4146  | 737.4205  | 2     | 45.0  | Q9JIL4 | Na(+)/H(+) exchange regulatory cofactor NHE-RF3                                                          |
| FSPLLYQSQELPngSVK                                     | 2008.9928 | 2009.0152 | 2     | 107.0 | Q9JIL4 | Na(+)/H(+) exchange regulatory cofactor NHE-RF3                                                          |
| GAPCSDAAGHQVPYK                                       | 1499.6827 | 1499.6811 | +2;+3 | 111.0 | Q8R242 | Di-N-acetylchitobiase                                                                                    |
| TGCTFPEKPDFH                                          | 1377.6024 | 1377.6131 | +2;+3 | 59.0  | P55264 | Adenosine kinase                                                                                         |
| SITIANQTNcPLYVTK                                      | 1764.908  | 1764.9254 | 2     | 103.0 | O08553 | Dihydropyrimidinase-related protein 2                                                                    |
| cLLPEGASELR + Carbamidomethyl (C)                     | 1243.623  | 1243.6354 | 2     | 33.0  | Q8VCT3 | Aminopeptidase B                                                                                         |
| AFFPcFDTPAVK + Carbamidomethyl (C)                    | 1398.6642 | 1398.6745 | 2     | 59.0  | Q8VCT3 | Aminopeptidase B                                                                                         |
| TICPQLQK                                              | 929.5004  | 929.5017  | 2     | 52.0  | Q8BH86 | UPF0317 protein C14orf159 homolog, mitochondrial                                                         |
| ASALACK                                               | 775.4262  | 775.4265  | +1;+2 | 74.0  | Q8BMF4 | Dihydrolipoyllysine-residue acetyltransferase component of pyruvate dehydrogenase complex, mitochondrial |

|                                                  |           |           |       |       |                             |                                                                                                          |
|--------------------------------------------------|-----------|-----------|-------|-------|-----------------------------|----------------------------------------------------------------------------------------------------------|
| DVPVGSIIcITVEKPDIEAFK + Carbamidomethyl (C)      | 2457.2825 | 2457.3005 | 3     | 63.0  | Q8BMF4                      | Dihydrolipoyllysine-residue acetyltransferase component of pyruvate dehydrogenase complex, mitochondrial |
| NcAVEFNFGQR + Carbamidomethyl (C)                | 1340.5932 | 1340.606  | 2     | 54.0  | Q8VDM6                      | Heterogeneous nuclear ribonucleoprotein U-like protein 1                                                 |
| AIVicPTDEDLKDR + Carbamidomethyl (C)             | 1643.8189 | 1643.8332 | 3     | 76.0  | Q8VDM6                      | Heterogeneous nuclear ribonucleoprotein U-like protein 1                                                 |
| ADGTcHVTTASLDGESSHK + Carbamidomethyl (C)        | 1971.8593 | 1971.8787 | 3     | 45.0  | P98197                      | Probable phospholipid-transporting ATPase IH                                                             |
| AeCSAEQcYK + 2 Carbamidomethyl (C)               | 1312.5064 | 1312.5162 | 2     | 70.0  | P06801                      | NADP-dependent malic enzyme                                                                              |
| QQLNiHGLLPcIISQELQVLR + Carbamidomethyl (C)      | 2568.421  | 2568.441  | 3     | 95.0  | P06801                      | NADP-dependent malic enzyme                                                                              |
| ICEEAFTR                                         | 967.4433  | 967.4505  | 2     | 65.0  | Q60597                      | 2-oxoglutarate dehydrogenase, mitochondrial                                                              |
| NINNDTTYcIKK + Carbamidomethyl (C)               | 1482.7137 | 1482.7156 | +2;+3 | 75.0  | Q99KR3                      | Endoribonuclease LACTB2                                                                                  |
| FTLDcTHPVEDGIMDAANFEQFLQER + Carbamidomethyl (C) | 3082.3801 | 3082.4137 | +3;+4 | 138.0 | P67984                      | 60S ribosomal protein L22                                                                                |
| TIQFVDWcPTGFK + Carbamidomethyl (C)              | 1597.7599 | 1597.7709 | 2     | 78.0  | P68373,Q9JJZ2,P68369,P05214 | Tubulin alpha-1C chain,Tubulin alpha-8 chain,Tubulin alpha-1A chain,Tubulin alpha-3 chain                |
| GLVVLGFPCNQFGHQENKNEEILNSLK                      | 3083.5498 | 3083.5621 | +3;+4 | 75.0  | P11352                      | Glutathione peroxidase 1                                                                                 |
| KAcGDSTLTQITAGLDPVGR + Carbamidomethyl (C)       | 2059.0368 | 2059.05   | 2     | 129.0 | P62880                      | Guanine nucleotide-binding protein G(I)/G(S)/G(T) subunit beta-2                                         |
| EYRDLTTAGAVTQCYR                                 | 1845.8679 | 1845.8927 | 2     | 83.0  | P62717                      | 60S ribosomal protein L18a                                                                               |
| cKDGvVFGVEK + Carbamidomethyl (C)                | 1236.6173 | 1236.6279 | +2;+3 | 109.0 | O70435                      | Proteasome subunit alpha type-3                                                                          |
| VLRCDVTK                                         | 932.5113  | 932.5044  | 2     | 38.0  | P40936                      | Indolethylamine N-methyltransferase                                                                      |
| AIQDAGCQVLK                                      | 1144.591  | 1144.5969 | 2     | 73.0  | P40936                      | Indolethylamine N-methyltransferase                                                                      |
| FDcHYCR + Carbamidomethyl (C)                    | 1067.3953 | 1067.4053 | +2;+3 | 41.0  | P97447                      | Four and a half LIM domains protein 1                                                                    |
| cLHPLASETFVSK + Carbamidomethyl (C)              | 1487.7442 | 1487.7448 | +2;+3 | 95.0  | P97447                      | Four and a half LIM domains protein 1                                                                    |
| cSEGpGLcLAR + 2 Carbamidomethyl (C)              | 1286.5747 | 1286.5969 | 2     | 68.0  | Q8VDK1                      | Nitrilase homolog 1                                                                                      |

|                                                  |           |           |       |       |               |                                                              |
|--------------------------------------------------|-----------|-----------|-------|-------|---------------|--------------------------------------------------------------|
| VLGDLSSSEDGCTYLK                                 | 1598.7498 | 1598.7567 | 2     | 124.0 | Q99MR8        | Methylcrotonoyl-CoA carboxylase subunit alpha, mitochondrial |
| cNLLAEK + Carbamidomethyl (C)                    | 846.4269  | 846.4267  | 2     | 45.0  | P29699        | Alpha-2-HS-glycoprotein                                      |
| ISALDTCVK                                        | 948.495   | 948.5045  | 2     | 80.0  | Q91VC4        | Plasmalemma vesicle-associated protein                       |
| QTEEQLEACGK                                      | 1234.5499 | 1234.5581 | 2     | 83.0  | Q91VC4        | Plasmalemma vesicle-associated protein                       |
| ADcKEEHDIPIR + Carbamidomethyl (C)               | 1368.6092 | 1368.6167 | +3;+4 | 50.0  | Q91VM9        | Inorganic pyrophosphatase 2, mitochondrial                   |
| STDccGDNDPIDVcEIGSK + 3 Carbamidomethyl (C)      | 2276.8872 | 2276.906  | 2     | 93.0  | Q91VM9        | Inorganic pyrophosphatase 2, mitochondrial                   |
| LGCPGFTLPEHRPNPEEGGASK                           | 2292.0957 | 2292.1144 | +3;+4 | 83.0  | P97494        | Glutamate--cysteine ligase catalytic subunit                 |
| HKPVTNQVECHPYLTQEK                               | 2150.0579 | 2150.0685 | 4     | 59.0  | P45377        | Aldose reductase-related protein 2                           |
| HKPVTNQVECHPYLTQEK + Carbamidomethyl (C)         | 2207.0793 | 2207.0838 | 3     | 85.0  | P45377        | Aldose reductase-related protein 2                           |
| LTEGCSFR                                         | 911.4171  | 911.4262  | 2     | 76.0  | Q6ZWU9,Q6ZWY3 | 40S ribosomal protein S27,40S ribosomal protein S27-like     |
| HIDcAQVYQNEK + Carbamidomethyl (C)               | 1503.6776 | 1503.6886 | +2;+3 | 90.0  | P45376        | Aldose reductase                                             |
| cLKDEDPYVR + Carbamidomethyl (C)                 | 1293.6023 | 1293.6137 | +2;+3 | 63.0  | O35643,Q9DBG3 | AP-1 complex subunit beta-1,AP-2 complex subunit beta        |
| DcPLNTEAASNK + Carbamidomethyl (C)               | 1318.5823 | 1318.5864 | 2     | 89.0  | O35643        | AP-1 complex subunit beta-1                                  |
| cVLTTVDPDTGIIDR + Carbamidomethyl (C)            | 1673.8295 | 1673.8447 | 2     | 102.0 | Q922Q1        | Mitochondrial amidoxime reducing component 2                 |
| GFGHIGIAVPDVYSaCKR + Carbamidomethyl (C)         | 1945.9833 | 1945.9973 | 4     | 40.0  | Q9CPU0        | Lactoylglutathione lyase                                     |
| ERPAPAVSSTCATAEDSSVLYSR                          | 2396.1278 | 2396.1317 | 3     | 111.0 | Q8CGC7        | Bifunctional glutamate/proline--tRNA ligase                  |
| LGTVADCGVPEAR                                    | 1286.6289 | 1286.6345 | 2     | 107.0 | Q8BWF0        | Succinate-semialdehyde dehydrogenase, mitochondrial          |
| EVGEVLCTDPLVSK                                   | 1487.7541 | 1487.7593 | 2     | 86.0  | Q8BWF0        | Succinate-semialdehyde dehydrogenase, mitochondrial          |
| SGTGQQLGQAAEESNcCAR + Carbamidomethyl (C)        | 1965.8269 | 1965.8496 | 2     | 103.0 | Q9JIZ9        | Phospholipid scramblase 3                                    |
| LYTVNAEEcAAALER + Carbamidomethyl (C)            | 1708.809  | 1708.8321 | 2     | 115.0 | Q78JN3        | Enoyl-CoA delta isomerase 3, peroxisomal                     |
| GLSLPPAcTR + Carbamidomethyl (C)                 | 1070.5543 | 1070.5526 | 2     | 54.0  | P30275        | Creatine kinase U-type, mitochondrial                        |
| TTPTGWTLDQciQTGVNDNPGHPFIK + Carbamidomethyl (C) | 2782.3385 | 2782.3593 | 3     | 120.0 | P30275        | Creatine kinase U-type, mitochondrial                        |
| cVIAEGDLGIVQK + Carbamidomethyl (C)              | 1400.7334 | 1400.7332 | 2     | 85.0  | Q9Z0S1        | 3'(2'),5'-bisphosphate nucleotidase 1                        |

|                                                |           |           |       |       |               |                                                                                                                              |
|------------------------------------------------|-----------|-----------|-------|-------|---------------|------------------------------------------------------------------------------------------------------------------------------|
| DFNEEcPR + Carbamidomethyl (C)                 | 1065.4185 | 1065.4241 | 2     | 41.0  | O55222        | Integrin-linked protein kinase                                                                                               |
| SRDFNEEcPR + Carbamidomethyl (C)               | 1308.5517 | 1308.5502 | 2     | 61.0  | O55222        | Integrin-linked protein kinase                                                                                               |
| VALEGLRPTIPPGISPHVCK                           | 2083.1612 | 2083.1732 | 4     | 32.0  | O55222        | Integrin-linked protein kinase                                                                                               |
| VDCDQHSDIAQR                                   | 1385.5994 | 1385.6078 | +2;+3 | 125.0 | Q9D1Q6        | Endoplasmic reticulum resident protein 44                                                                                    |
| LVEEAIQCAEK                                    | 1231.6118 | 1231.6124 | 2     | 87.0  | Q8BH95        | Enoyl-CoA hydratase, mitochondrial                                                                                           |
| cPENAFFLDHVR + Carbamidomethyl (C)             | 1503.6929 | 1503.7054 | 3     | 91.0  | Q9WTI7        | Unconventional myosin-1c                                                                                                     |
| AFGYVcGGEGQHQQFFAIK + Carbamidomethyl (C)      | 2014.936  | 2014.9495 | +2;+3 | 89.0  | P98078        | Disabled homolog 2                                                                                                           |
| SVLSVCFPGcVLTNGEAEQQR + Carbamidomethyl (C)    | 2361.1093 | 2361.1096 | 2     | 132.0 | P27601        | Guanine nucleotide-binding protein subunit alpha-13                                                                          |
| VVGGcVANPHSWPWQISLR + Carbamidomethyl (C)      | 2162.0844 | 2162.1039 | 3     | 88.0  | P20918        | Plasminogen                                                                                                                  |
| GHIEDcGHWQTIEKPTVNLQILIK + Carbamidomethyl (C) | 2844.4229 | 2844.4422 | +3;+4 | 44.0  | P34914        | Bifunctional epoxide hydrolase 2                                                                                             |
| cLEEVEDLIVK + Carbamidomethyl (C)              | 1345.6799 | 1345.6891 | 2     | 87.0  | P61922        | 4-aminobutyrate aminotransferase, mitochondrial                                                                              |
| SKFDNLYGCR                                     | 1201.555  | 1201.5571 | +2;+3 | 66.0  | P50247        | Adenosylhomocysteinase                                                                                                       |
| VAVVAGYGDVVGKCAQALR                            | 1832.9567 | 1832.9688 | 3     | 58.0  | P50247        | Adenosylhomocysteinase                                                                                                       |
| NSCPPTAELLGSPGR                                | 1497.7246 | 1497.7479 | 2     | 85.0  | P46412        | Glutathione peroxidase 3                                                                                                     |
| FicEQEHEK + Carbamidomethyl (C)                | 1218.5339 | 1218.5333 | +2;+3 | 55.0  | Q61699        | Heat shock protein 105 kDa                                                                                                   |
| YAEcGLR + Carbamidomethyl (C)                  | 867.3909  | 867.3892  | 2     | 44.0  | O70325,Q91XR9 | Phospholipid hydroperoxide glutathione peroxidase, mitochondrial, Phospholipid hydroperoxide glutathione peroxidase, nuclear |
| ILAFPcNQFGR + Carbamidomethyl (C)              | 1321.6601 | 1321.6652 | 2     | 83.0  | O70325,Q91XR9 | Phospholipid hydroperoxide glutathione peroxidase, mitochondrial, Phospholipid hydroperoxide glutathione peroxidase, nuclear |
| LKELESQVSCLEK                                  | 1504.7807 | 1504.7946 | +2;+3 | 44.0  | Q99PL5        | Ribosome-binding protein 1                                                                                                   |
| SKcEELSSLHGQLK + Carbamidomethyl (C)           | 1614.8035 | 1614.812  | 4     | 54.0  | Q99PL5        | Ribosome-binding protein 1                                                                                                   |
| VTYDSDATSSACR                                  | 1374.5722 | 1374.5828 | 2     | 98.0  | O89013        | Leptin receptor gene-related protein                                                                                         |
| TAAHHcTLLCSTNR + Carbamidomethyl (C)           | 1746.793  | 1746.7977 | 3     | 80.0  | Q8VCM4        | Lipoyltransferase 1, mitochondrial                                                                                           |

|                                             |           |           |          |       |               |                                                                 |
|---------------------------------------------|-----------|-----------|----------|-------|---------------|-----------------------------------------------------------------|
| APPESLCR                                    | 871.4222  | 871.423   | 2        | 64.0  | Q9CWS0        | N(G),N(G)-dimethylarginine dimethylaminohydrolase 1             |
| APPESLcR + Carbamidomethyl (C)              | 928.4436  | 928.4481  | 2        | 50.0  | Q9CWS0        | N(G),N(G)-dimethylarginine dimethylaminohydrolase 1             |
| VYCGHEyTVNNLK                               | 1538.7188 | 1538.7206 | +2;+3    | 87.0  | Q99KB8        | Hydroxyacylglutathione hydrolase, mitochondrial                 |
| AALLAELASLEADALREHcQR + Carbamidomethyl (C) | 2336.1906 | 2336.1972 | 4        | 90.0  | Q3TW96        | UDP-N-acetylhexosamine pyrophosphorylase-like protein 1         |
| LIPDGcGVK + Carbamidomethyl (C)             | 957.4954  | 957.499   | 2        | 56.0  | Q6ZWW3,P86048 | 60S ribosomal protein L10,60S ribosomal protein L10-like        |
| VDRGENQILSCR                                | 1388.683  | 1388.692  | +2;+3    | 78.0  | Q8VHL0        | Urea transporter 1                                              |
| HQADACHAYQIHR                               | 1661.7845 | 1661.7843 | 4        | 53.0  | O89017        | Legumain                                                        |
| VCETDGcSSEAK + Carbamidomethyl (C)          | 1352.5224 | 1352.5255 | 2        | 78.0  | Q8BP48        | Methionine aminopeptidase 1                                     |
| TVIGcSGFHGDcLTLTK + 2 Carbamidomethyl (C)   | 1932.9074 | 1932.9246 | +2;+3    | 64.0  | O09061        | Proteasome subunit beta type-1                                  |
| QPLSSMCPSIILDKDGQVR                         | 2086.0551 | 2086.0672 | +2;+3    | 147.0 | Q60928        | Gamma-glutamyltranspeptidase 1                                  |
| FcETTIGCKDPAQGQLLK + Carbamidomethyl (C)    | 2076.002  | 2076.0136 | 3        | 106.0 | P13707        | Glycerol-3-phosphate dehydrogenase [NAD(+)], cytoplasmic        |
| NDPYHPDHFNCANCGK + Carbamidomethyl (C)      | 1955.7679 | 1955.7695 | 3        | 58.0  | Q99JW4        | LIM and senescent cell antigen-like-containing domain protein 1 |
| NDPYHPDHFNCANcGK + 2 Carbamidomethyl (C)    | 2012.7894 | 2012.8165 | 3        | 59.0  | Q99JW4        | LIM and senescent cell antigen-like-containing domain protein 1 |
| IKGVGACVLVA                                 | 1085.6267 | 1085.6316 | 2        | 65.0  | P14115        | 60S ribosomal protein L27a                                      |
| HKQEDIPISGWAVECR                            | 1866.9046 | 1866.9302 | +2;+3;+4 | 107.0 | Q91ZA3        | Propionyl-CoA carboxylase alpha chain, mitochondrial            |
| DRDNHcGLATAASYPVVN                          | 1901.869  | 1901.8831 | +2;+3    | 89.0  | P06797        | Cathepsin L1                                                    |
| SFTSScPVSAFVPK + Carbamidomethyl (C)        | 1512.7283 | 1512.7423 | 2        | 31.0  | Q8R0F8        | Acylpyruvase FAHD1, mitochondrial                               |
| TLCWcGVQHDR + Carbamidomethyl (C)           | 1373.5969 | 1373.6105 | 3        | 47.0  | Q49B93        | Sodium-coupled monocarboxylate transporter 2                    |
| ACYGVLR                                     | 780.3952  | 780.3962  | 2        | 54.0  | P62908        | 40S ribosomal protein S3                                        |
| cEVVVSgK + Carbamidomethyl (C)              | 876.4375  | 876.4405  | 2        | 64.0  | P62908        | 40S ribosomal protein S3                                        |
| DSGSALGLGIALHTPCYAQIR                       | 2142.0892 | 2142.1258 | +2;+3    | 110.0 | Q6NSQ9        | Glucose-6-phosphatase 3                                         |
| cLIFR + Carbamidomethyl (C)                 | 707.3789  | 707.3863  | 2        | 37.0  | Q9DCS2        | UPF0585 protein C16orf13 homolog                                |



|                                                          |           |           |       |       |        |                                                             |
|----------------------------------------------------------|-----------|-----------|-------|-------|--------|-------------------------------------------------------------|
| cLDSIAATTR + Carbamidomethyl (C)                         | 1106.539  | 1106.537  | 2     | 76.0  | Q9DCS2 | UPF0585 protein C16orf13 homolog                            |
| AcPLLANDNILHHLPK + Carbamidomethyl (C)                   | 1824.9668 | 1824.9795 | 4     | 70.0  | Q99PG0 | Arylacetamide deacetylase                                   |
| cTESEEEVTK + Carbamidomethyl (C)                         | 1339.5449 | 1339.5531 | 2     | 69.0  | Q9JMA1 | Ubiquitin carboxyl-terminal hydrolase 14                    |
| SPYCITK                                                  | 810.3946  | 810.3971  | 2     | 46.0  | Q80XN0 | D-beta-hydroxybutyrate dehydrogenase, mitochondrial         |
| FGIEAFSDcLR + Carbamidomethyl (C)                        | 1313.6074 | 1313.6084 | 2     | 93.0  | Q80XN0 | D-beta-hydroxybutyrate dehydrogenase, mitochondrial         |
| HGIPDETCNNYQAK + Carbamidomethyl (C)                     | 1645.7155 | 1645.7254 | +2;+3 | 79.0  | Q9WUU7 | Cathepsin Z                                                 |
| SSVVPVEGcPELPHK + Carbamidomethyl (C)                    | 1633.8134 | 1633.8209 | +2;+3 | 77.0  | Q99K67 | Alpha-aminoadipic semialdehyde synthase, mitochondrial      |
| GAQEVFNELPcEYVEPELHR + Carbamidomethyl (C)               | 2415.1165 | 2415.127  | +2;+3 | 107.0 | Q99K67 | Alpha-aminoadipic semialdehyde synthase, mitochondrial      |
| TATAVAHcK + Carbamidomethyl (C)                          | 957.4702  | 957.4719  | +2;+3 | 82.0  | P14131 | 40S ribosomal protein S16                                   |
| QVLVAPGNAGTACAGK                                         | 1455.7504 | 1455.7499 | 2     | 96.0  | Q64737 | Trifunctional purine biosynthetic protein adenosine-3       |
| TNFIEADKYFLPFELAcQSK + Carbamidomethyl (C)               | 2420.1722 | 2420.191  | 3     | 67.0  | G3X9K3 | Brefeldin A-inhibited guanine nucleotide-exchange protein 1 |
| AAGCDFNNVVK                                              | 1136.5284 | 1136.5295 | 2     | 96.0  | P52760 | Ribonuclease UK114                                          |
| AAGcDFNNVVK + Carbamidomethyl (C)                        | 1193.5499 | 1193.5576 | 2     | 38.0  | P52760 | Ribonuclease UK114                                          |
| cAFQGNVVVGR + Carbamidomethyl (C)                        | 1205.5975 | 1205.6099 | 2     | 65.0  | Q61578 | NADPH:adrenodoxin oxidoreductase, mitochondrial             |
| IccDLEVLASK + 2 Carbamidomethyl (C)                      | 1374.6523 | 1374.6658 | 2     | 65.0  | Q99MN9 | Propionyl-CoA carboxylase beta chain, mitochondrial         |
| ASLQELDLSSNKLGNAGIAALc PGLLLPScK + 2 Carbamidomethyl (C) | 3277.705  | 3277.747  | 3     | 64.0  | Q91V17 | Ribonuclease inhibitor                                      |
| ccLASASAVK + 2 Carbamidomethyl (C)                       | 1133.5209 | 1133.5258 | 2     | 68.0  | Q80W22 | Threonine synthase-like 2                                   |
| cAADLGLKR + Carbamidomethyl (C)                          | 1002.528  | 1002.5349 | 3     | 64.0  | P70349 | Histidine triad nucleotide-binding protein 1                |
| NccGASRPFTLR + 2 Carbamidomethyl (C)                     | 1437.6605 | 1437.6653 | 3     | 30.0  | Q9JJ00 | Phospholipid scramblase 1                                   |
| VYFAVEDTDCCTRN                                           | 1634.6705 | 1634.6982 | 2     | 64.0  | Q9JJ00 | Phospholipid scramblase 1                                   |
| TScQQAPEQVYKH + Carbamidomethyl (C)                      | 1574.7147 | 1574.7201 | 3     | 63.0  | Q8C025 | Cholinephosphotransferase 1                                 |

|                                            |           |           |       |       |        |                                                                |
|--------------------------------------------|-----------|-----------|-------|-------|--------|----------------------------------------------------------------|
| TcHSFIINEK + Carbamidomethyl (C)           | 1247.5968 | 1247.6035 | 3     | 63.0  | Q8R1B4 | Eukaryotic translation initiation factor 3 subunit C           |
| VVDDTAcPLLRK + Carbamidomethyl (C)         | 1385.7337 | 1385.7445 | 3     | 63.0  | Q8BY89 | Choline transporter-like protein 2                             |
| GAVHQLcQSLAGK + Carbamidomethyl (C)        | 1367.698  | 1367.6998 | +2;+3 | 98.0  | Q8BVI4 | Dihydropteridine reductase                                     |
| FATDGEgyKPCDPQVIR                          | 1894.8884 | 1894.904  | 3     | 62.0  | Q62261 | Spectrin beta chain, non-erythrocytic 1                        |
| QLSAFAIwVQTVPLTcNPNK + Carbamidomethyl (C) | 2286.1831 | 2286.217  | 3     | 62.0  | P28665 | Murinoglobulin-1                                               |
| SEDCfILDHGR + Carbamidomethyl (C)          | 1347.5878 | 1347.5992 | +2;+3 | 61.0  | P13020 | Gelsolin                                                       |
| DVFcScNVGNLQPGAK + Carbamidomethyl (C)     | 1604.7617 | 1604.7671 | 2     | 101.0 | Q99KC8 | von Willebrand factor A domain-containing protein 5A           |
| VDCTPLLNQLVYK                              | 1504.7959 | 1504.8003 | 2     | 72.0  | Q9CZR2 | N-acetylated-alpha-linked acidic dipeptidase 2                 |
| ELEETNAFNcR + Carbamidomethyl (C)          | 1510.6358 | 1510.6485 | 2     | 60.0  | Q8CHH9 | Septin-8                                                       |
| ELANTPDCPR                                 | 1114.5077 | 1114.5145 | 2     | 60.0  | P53811 | Phosphatidylinositol transfer protein beta isoform             |
| EAIvNSCVFVHQLHQANAR                        | 2236.1171 | 2236.1388 | 3     | 60.0  | Q9JHU4 | Cytoplasmic dynein 1 heavy chain 1                             |
| EVcGFAPYER + Carbamidomethyl (C)           | 1226.539  | 1226.5485 | 2     | 60.0  | P47964 | 60S ribosomal protein L36                                      |
| IYcPFAGYFVESHPSDKYIK + Carbamidomethyl (C) | 2420.1511 | 2420.1613 | 4     | 71.0  | Q61419 | Cytidine monophosphate-N-acetylneuraminic acid hydroxylase     |
| DVKPhcVLLASK + Carbamidomethyl (C)         | 1365.7439 | 1365.7542 | 3     | 59.0  | O70589 | Peripheral plasma membrane protein CASK                        |
| NCVAIAADR                                  | 931.4545  | 931.4588  | 2     | 59.0  | Q9R1P1 | Proteasome subunit beta type-3                                 |
| GTFDVEclTTDHYTGGMK + Carbamidomethyl (C)   | 2030.8714 | 2030.8812 | +2;+3 | 108.0 | Q61147 | Ceruloplasmin                                                  |
| ALDLSSCK                                   | 950.4379  | 950.4463  | 2     | 65.0  | Q60864 | Stress-induced-phosphoprotein 1                                |
| GVFcAGADLK + Carbamidomethyl (C)           | 1036.5012 | 1036.5017 | 2     | 65.0  | Q3TLP5 | Enoyl-CoA hydratase domain-containing protein 2, mitochondrial |
| AVLFCLSEDKK                                | 1251.6533 | 1251.6556 | 3     | 63.0  | P18760 | Cofilin-1                                                      |
| FSQICAK                                    | 795.3949  | 795.401   | 2     | 56.0  | P56382 | ATP synthase subunit epsilon, mitochondrial                    |
| VPVYCTK                                    | 808.4153  | 808.4145  | 2     | 54.0  | Q9CYR6 | Phosphoacetylglucosamine mutase                                |
| cESAFLSK + Carbamidomethyl (C)             | 940.4324  | 940.4368  | 2     | 56.0  | Q8BP67 | 60S ribosomal protein L24                                      |
| FCYADK                                     | 745.3105  | 745.3207  | 2     | 42.0  | Q8CHT0 | Delta-1-pyrroline-5-carboxylate dehydrogenase, mitochondrial   |

|                                                          |           |           |   |       |               |                                                                                            |
|----------------------------------------------------------|-----------|-----------|---|-------|---------------|--------------------------------------------------------------------------------------------|
| LAGEcGGK + Carbamidomethyl (C)                           | 790.3643  | 790.3665  | 2 | 64.0  | Q8CHT0        | Delta-1-pyrroline-5-carboxylate dehydrogenase, mitochondrial                               |
| VIEPGcVR                                                 | 871.4586  | 871.4635  | 2 | 52.0  | Q9QYJ0        | DnaJ homolog subfamily A member 2                                                          |
| VIEPGcVR + Carbamidomethyl (C)                           | 928.48    | 928.4867  | 2 | 59.0  | Q9QYJ0        | DnaJ homolog subfamily A member 2                                                          |
| NVLCsAcSGGGK + 2 Carbamidomethyl (C)                     | 1404.6126 | 1404.6231 | 2 | 35.0  | Q9QYJ0        | DnaJ homolog subfamily A member 2                                                          |
| AcADGGANHLYDLTEGER + Carbamidomethyl (C)                 | 1947.8381 | 1947.8595 | 3 | 53.0  | Q9R0M5        | Thiamin pyrophosphokinase 1                                                                |
| FGGAFcR                                                  | 756.3377  | 756.3439  | 2 | 53.0  | O35295        | Transcriptional activator protein Pur-beta                                                 |
| FAAAYcR                                                  | 800.3639  | 800.365   | 2 | 55.0  | P35486        | Pyruvate dehydrogenase E1 component subunit alpha, somatic form, mitochondrial             |
| FAAAYcR + Carbamidomethyl (C)                            | 857.3854  | 857.3838  | 2 | 53.0  | P35486        | Pyruvate dehydrogenase E1 component subunit alpha, somatic form, mitochondrial             |
| GLCPLAPR                                                 | 825.4531  | 825.456   | 2 | 52.0  | Q9DCQ2        | Putative L-aspartate dehydrogenase                                                         |
| GVTEcYcHPKPTQR + 2 Carbamidomethyl (C)                   | 1928.8509 | 1928.862  | 3 | 53.0  | Q9Z1F9        | SUMO-activating enzyme subunit 2                                                           |
| ITFPGcFTNSCcSHPLSNPGELE ENNAIGVK + 2 Carbamidomethyl (C) | 3527.5796 | 3527.5909 | 3 | 102.0 | P58044        | Isopentenyl-diphosphate Delta-isomerase 1                                                  |
| NFNLPmCK                                                 | 965.4463  | 965.4494  | 2 | 49.0  | Q9D0K2        | Succinyl-CoA:3-ketoacid coenzyme A transferase 1, mitochondrial                            |
| cVYYR + Carbamidomethyl (C)                              | 759.3374  | 759.3427  | 2 | 36.0  | Q02053,P31254 | Ubiquitin-like modifier-activating enzyme 1, Ubiquitin-like modifier-activating enzyme 1 Y |
| HVLtGSADNScR                                             | 1258.5724 | 1258.5758 | 2 | 50.0  | Q9QZD9        | Eukaryotic translation initiation factor 3 subunit I                                       |
| EKYPcHSFIGEESVAAGEK + Carbamidomethyl (C)                | 2136.9786 | 2136.9986 | 3 | 50.0  | O55023        | Inositol monophosphatase 1                                                                 |
| cDLEDERVVGK + Carbamidomethyl (C)                        | 1318.6187 | 1318.6226 | 3 | 48.0  | Q99J16,P62835 | Ras-related protein Rap-1b, Ras-related protein Rap-1A                                     |
| cGLLPISPEALSLGDVAYHDYH GILVDEEEK + Carbamidomethyl (C)   | 3438.6653 | 3438.6846 | 4 | 53.0  | Q9QYC0        | Alpha-adducin                                                                              |
| LNISFPATGCQK                                             | 1277.6438 | 1277.6463 | 2 | 77.0  | P62754        | 40S ribosomal protein S6                                                                   |

|                                                 |           |           |          |      |        |                                                      |
|-------------------------------------------------|-----------|-----------|----------|------|--------|------------------------------------------------------|
| cPYKDTLGPMQK + Carbamidomethyl (C)              | 1436.6792 | 1436.6793 | +2;+3    | 86.0 | Q9Z1D1 | Eukaryotic translation initiation factor 3 subunit G |
| AGTAFYIDQcAVR + Carbamidomethyl (C)             | 1470.6926 | 1470.7012 | 2        | 70.0 | Q8CC88 | von Willebrand factor A domain-containing protein 8  |
| SLLcMPIR + Carbamidomethyl (C)                  | 988.5198  | 988.4853  | 2        | 52.0 | P0C1Q2 | Dual 3',5'-cyclic-AMP and -GMP phosphodiesterase 11A |
| SILccLR + 2 Carbamidomethyl (C)                 | 988.4834  | 988.4853  | 2        | 52.0 | Q9R0Q7 | Prostaglandin E synthase 3                           |
| IQFHNVKPEcLDAYNSLAEVLPK + Carbamidomethyl (C)   | 2785.4109 | 2785.4324 | 4        | 56.0 | O55125 | Protein NipSnap homolog 1                            |
| cHDFRETADVIK + Carbamidomethyl (C)              | 1560.7355 | 1560.7427 | +2;+3;+4 | 75.0 | O55013 | Trafficking protein particle complex subunit 3       |
| GHTEIIVPQLTESYNSHRDPPEEEIPFCTLK                 | 3578.7351 | 3578.7631 | 4        | 45.0 | Q8C7R4 | Ubiquitin-like modifier-activating enzyme 6          |
| cALGVFR + Carbamidomethyl (C)                   | 821.4218  | 821.4285  | 2        | 45.0 | Q8VDM4 | 26S proteasome non-ATPase regulatory subunit 2       |
| TEVNIQHEDCK                                     | 1314.5874 | 1314.5878 | 2        | 84.0 | Q3UEG6 | Alanine-glyoxylate aminotransferase 2, mitochondrial |
| GAYHGCSPTYLGLTNVGIYK                            | 2113.0303 | 2113.0658 | 2        | 44.0 | Q3UEG6 | Alanine-glyoxylate aminotransferase 2, mitochondrial |
| TGPNLHGLFGR                                     | 1167.6149 | 1167.6212 | 3        | 51.0 | P62897 | Cytochrome c, somatic                                |
| QWSGCVK                                         | 806.3745  | 806.3745  | 2        | 45.0 | Q9DCW2 | Phospholipid scramblase 2                            |
| FCINPK                                          | 720.3629  | 720.3638  | 2        | 44.0 | P79457 | Histone demethylase UTY                              |
| AIWNVINWENVTERYTACK                             | 2309.1263 | 2309.1369 | 3        | 90.0 | P09671 | Superoxide dismutase [Mn], mitochondrial             |
| AKLFPHCGR                                       | 1027.5385 | 1027.5448 | 3        | 43.0 | P51863 | V-type proton ATPase subunit d 1                     |
| RPPSAFFLCSEYRPK                                 | 1943.9716 | 1943.9795 | 3        | 68.0 | P63158 | High mobility group protein B1                       |
| ISEDPPcK + Carbamidomethyl (C)                  | 944.4273  | 944.4315  | 2        | 42.0 | P11862 | Growth arrest-specific protein 2                     |
| VTDKLTPIHDHIFcCR + Carbamidomethyl (C)          | 1953.9553 | 1953.9551 | 4        | 54.0 | Q60692 | Proteasome subunit beta type-6                       |
| ccLEEGLEPTcFER + 3 Carbamidomethyl (C)          | 1934.7849 | 1934.7994 | 2        | 80.0 | P50285 | Dimethylaniline monooxygenase [N-oxide forming] 1    |
| LcSTQLSLNcLcVNPVcRK + 3 Carbamidomethyl (C)     | 2565.2212 | 2565.2633 | 3        | 41.0 | P22315 | Ferrocyclase, mitochondrial                          |
| AYFPcIGcVHAISTDSDLEPVLK + 2 Carbamidomethyl (C) | 2756.319  | 2756.3342 | 3        | 62.0 | O08677 | Kininogen-1                                          |
| KHNLcGETEEER                                    | 1443.6412 | 1443.6549 | 3        | 40.0 | Q80W21 | Glutathione S-transferase Mu 7                       |

|                                           |           |           |   |       |               |                                                                          |
|-------------------------------------------|-----------|-----------|---|-------|---------------|--------------------------------------------------------------------------|
| AAFGLSEAGFNTACLTK                         | 1699.8239 | 1699.8364 | 2 | 120.0 | Q8K2B3        | Succinate dehydrogenase [ubiquinone] flavoprotein subunit, mitochondrial |
| cTPSPSESK + Carbamidomethyl (C)           | 1078.4601 | 1078.4783 | 2 | 39.0  | O08736        | Caspase-12                                                               |
| LAETHQQEccQK + 2 Carbamidomethyl (C)      | 1598.6817 | 1598.6878 | 3 | 39.0  | Q9D8U8        | Sorting nexin-5                                                          |
| GcFEcCIK + 2 Carbamidomethyl (C)          | 1015.3925 | 1015.4023 | 2 | 39.0  | P35802,P35803 | Neuronal membrane glycoprotein M6-a, Neuronal membrane glycoprotein M6-b |
| TSLRPQTFYDGSHCsAR + Carbamidomethyl (C)   | 1981.9065 | 1981.9271 | 3 | 38.0  | Q9CQ65        | S-methyl-5'-thioadenosine phosphorylase                                  |
| LGQLPDSEVAYSEK                            | 1534.7515 | 1534.7953 | 2 | 37.0  | Q14DK4        | Glycerol-3-phosphate acyltransferase 2, mitochondrial                    |
| ADDPNSIFLIDHAWTCR                         | 1972.9101 | 1972.9035 | 3 | 84.0  | Q3UDE2        | Tubulin--tyrosine ligase-like protein 12                                 |
| NcSVPR + Carbamidomethyl (C)              | 731.3385  | 731.3227  | 2 | 36.0  | Q9QYE5        | Protein jagged-2                                                         |
| STITEMAAAQ                                | 1021.475  | 1021.4555 | 2 | 35.0  | Q91ZD1        | Protein odd-skipped-related 2                                            |
| NPFTGLCR                                  | 906.4382  | 906.4452  | 2 | 34.0  | Q91WC9        | Sn1-specific diacylglycerol lipase beta                                  |
| QPGSAQAQALGLAQLA                          | 1522.8103 | 1522.7836 | 2 | 33.0  | Q64028        | Polyhomeotic-like protein 1                                              |
| YPHcAVNGLLVAER + Carbamidomethyl (C)      | 1597.8035 | 1597.8178 | 3 | 33.0  | O70378        | ER membrane protein complex subunit 8                                    |
| KSLPLENQIK                                | 1281.7656 | 1281.7745 | 2 | 32.0  | Q9WVP9        | Interferon-induced GTP-binding protein Mx2                               |
| cKDVLTKQEFDVR + Carbamidomethyl (C)       | 1565.7508 | 1565.7605 | 3 | 31.0  | Q64521        | Glycerol-3-phosphate dehydrogenase, mitochondrial                        |
| TYLSSHSScFWVAESR + Carbamidomethyl (C)    | 1915.8523 | 1915.8568 | 3 | 82.0  | Q9JIY8        | Probable N-acetyltransferase CML3                                        |
| ELEVYLLVKSCWE                             | 1609.8062 | 1609.8395 | 3 | 30.0  | Q3UWA6        | Heat-stable enterotoxin receptor                                         |
| DTLVWDTPTYHTVWDcDFR + Carbamidomethyl (C) | 2325.0161 | 2325.0216 | 3 | 72.0  | Q99NB1        | Acetyl-coenzyme A synthetase 2-like, mitochondrial                       |
| HEGEGLPDFRTEK                             | 1513.7161 | 1513.7299 | 2 | 30.0  | E9Q5G7        | Oogenesis-1                                                              |
| ALVSSVR                                   | 730.4337  | 730.4415  | 2 | 53.0  | P07724        | Serum albumin                                                            |
| EFQcGSGEcILR + 2 Carbamidomethyl (C)      | 1522.6544 | 1522.6774 | 2 | 71.0  | A2ARV4        | Low-density lipoprotein receptor-related protein 2                       |
| cIPIWwKcDGQK + 2 Carbamidomethyl (C)      | 1657.7745 | 1657.7841 | 3 | 51.0  | A2ARV4        | Low-density lipoprotein receptor-related protein 2                       |

|                                                       |           |           |       |       |                             |                                                                                                 |
|-------------------------------------------------------|-----------|-----------|-------|-------|-----------------------------|-------------------------------------------------------------------------------------------------|
| RcAADGSPLLLLPENVR + Carbamidomethyl (C)               | 2045.0728 | 2045.0396 | 3     | 33.0  | A2ARV4                      | Low-density lipoprotein receptor-related protein 2                                              |
| TcVDIDeCKETPQLcSQK + 3 Carbamidomethyl (C)            | 2277.9916 | 2278.0024 | +2;+3 | 88.0  | A2ARV4                      | Low-density lipoprotein receptor-related protein 2                                              |
| VKAVLTSQETLFGGSDcTGNFc LFK + 2 Carbamidomethyl (C)    | 2846.3619 | 2846.3744 | 3     | 144.0 | Q92111                      | Serotransferrin                                                                                 |
| QGAALGIPYFTAcRALFHSAR + Carbamidomethyl (C)           | 2306.1742 | 2306.1982 | 4     | 46.0  | P47199                      | Quinone oxidoreductase                                                                          |
| TcGFDFSGALEDISK + Carbamidomethyl (C)                 | 1645.7294 | 1645.7304 | 2     | 81.0  | P05202                      | Aspartate aminotransferase, mitochondrial                                                       |
| ISVAGVTSGNVGYLAHAIHQVT K                              | 2321.2492 | 2321.2797 | 4     | 40.0  | P05202                      | Aspartate aminotransferase, mitochondrial                                                       |
| FGANAILGVSLAVcKAGAVEK + Carbamidomethyl (C)           | 2074.1245 | 2074.1404 | 3     | 81.0  | P17182                      | Alpha-enolase                                                                                   |
| SGETEDTFIADLVVGLcTGQIKT GAPcR + 2 Carbamidomethyl (C) | 3062.4689 | 3062.5033 | 3     | 74.0  | P17182,P17183               | Alpha-enolase,Gamma-enolase                                                                     |
| AAVARGAQVIENcAVTGIR + Carbamidomethyl (C)             | 1955.0371 | 1955.0627 | 3     | 99.0  | Q99LB7                      | Sarcosine dehydrogenase, mitochondrial                                                          |
| cMALSTAILVGEAKK + Carbamidomethyl (C)                 | 1590.8473 | 1590.8632 | 3     | 80.0  | Q9EQ20                      | Methylmalonate-semialdehyde dehydrogenase [acylating], mitochondrial                            |
| PSIPKENFScLTR + Carbamidomethyl (C)                   | 1547.7766 | 1547.7822 | 3     | 75.0  | P14152                      | Malate dehydrogenase, cytoplasmic                                                               |
| LLLCAR + Carbamidomethyl (C)                          | 744.4316  | 744.4398  | 2     | 53.0  | P21981                      | Protein-glutamine gamma-glutamyltransferase 2                                                   |
| GEWIKPGAVVIDcGINYPDD TKPNGR + Carbamidomethyl (C)     | 2969.4706 | 2969.4943 | +3;+4 | 114.0 | Q922D8                      | C-1-tetrahydrofolate synthase, cytoplasmic                                                      |
| NALPTPDDPTALMTDPK                                     | 1882.8982 | 1882.9277 | 2     | 77.0  | P11352                      | Glutathione peroxidase 1                                                                        |
| IKIIAPPER                                             | 1035.644  | 1035.6487 | +2;+3 | 42.0  | P60710,Q8BFZ3,P62737,P63260 | Actin, cytoplasmic 1,Beta-actin-like protein 2,Actin, aortic smooth muscle,Actin, cytoplasmic 2 |
| NGSGMcKAGFAGDDAPR + Carbamidomethyl (C)               | 1709.725  | 1709.7281 | 3     | 100.0 | P60710,P63260               | Actin, cytoplasmic 1,Actin, cytoplasmic 2                                                       |
| IDLPETFDAREQWSNcPTIGQIR + Carbamidomethyl (C)         | 2745.3181 | 2745.3522 | 3     | 82.0  | P10605                      | Cathepsin B                                                                                     |
| LSLELGGKNPAIFEDANLEECIP ATVR + Carbamidomethyl (C)    | 3068.5852 | 3068.6083 | 3     | 155.0 | Q8BH00                      | Aldehyde dehydrogenase family 8 member A1                                                       |
| PlcPVFRGFSK + Carbamidomethyl (C)                     | 1306.6856 | 1306.7049 | 2     | 57.0  | Q9Z2J0                      | Solute carrier family 23 member 1                                                               |

|                                                    |           |           |       |       |               |                                                                                       |
|----------------------------------------------------|-----------|-----------|-------|-------|---------------|---------------------------------------------------------------------------------------|
| AFEPATGRVIATFAcSGEK + Carbamidomethyl (C)          | 2010.9833 | 2010.989  | 3     | 91.0  | Q9JLJ2        | 4-trimethylaminobutyraldehyde dehydrogenase                                           |
| TLTELNKCCGLcPcNR + 3 Carbamidomethyl (C)           | 2290.0037 | 2289.9991 | 3     | 35.0  | O09044        | Synaptosomal-associated protein 23                                                    |
| VAAKLNVPVSDIIEIK                                   | 1779.0506 | 1779.0699 | 3     | 97.0  | Q99LC5        | Electron transfer flavoprotein subunit alpha, mitochondrial                           |
| FRcPETLFQPSF + Carbamidomethyl (C)                 | 1527.718  | 1527.7374 | 2     | 57.0  | P62737        | Actin, aortic smooth muscle                                                           |
| EATSVLGEHQALcTITSFPR + Carbamidomethyl (C)         | 2216.0896 | 2216.0974 | 3     | 110.0 | P97494        | Glutamate--cysteine ligase catalytic subunit                                          |
| AKDDQTPLHcAAR + Carbamidomethyl (C)                | 1481.7045 | 1481.7136 | 3     | 50.0  | Q02357        | Ankyrin-1                                                                             |
| cTcccFccPcAR + 7 Carbamidomethyl (C)               | 1710.5322 | 1710.5463 | 2     | 68.0  | P58196        | Phospholipid scramblase 4                                                             |
| QELEVQcPPGVTIGFVAEHWN LcR + 2 Carbamidomethyl (C)  | 2906.3844 | 2906.4087 | 3     | 107.0 | P58196        | Phospholipid scramblase 4                                                             |
| cccVADRTGHSLLHTLYGR + 3 Carbamidomethyl (C)        | 2411.0933 | 2411.1196 | 3     | 38.0  | Q8K2B3        | Succinate dehydrogenase [ubiquinone] flavoprotein subunit, mitochondrial              |
| GVQGFQDYIEKHcPSAVVPVEL QK + Carbamidomethyl (C)    | 2727.369  | 2727.4021 | +3;+4 | 93.0  | Q6A0A9        | Constitutive coactivator of PPAR-gamma-like protein 1                                 |
| YQEALPTVANSTGPHAAScFG AK + Carbamidomethyl (C)     | 2376.1168 | 2376.1332 | +2;+3 | 143.0 | P30999        | Catenin delta-1                                                                       |
| IQAPPGVPVGYVTQTWHPcLP K + Carbamidomethyl (C)      | 2444.2675 | 2444.3006 | 3     | 87.0  | Q9JJ00        | Phospholipid scramblase 1                                                             |
| VRPcVVYGGAEIGQQIR + Carbamidomethyl (C)            | 1900.9942 | 1901.0046 | 3     | 120.0 | Q62167        | ATP-dependent RNA helicase DDX3X                                                      |
| EFTTTVVSscPAELQTDASGGK K + Carbamidomethyl (C)     | 2412.1479 | 2412.1956 | 3     | 113.0 | Q3THG9        | Alanyl-tRNA editing protein Aarsd1                                                    |
| YLEcSALTQR + Carbamidomethyl (C)                   | 1239.5918 | 1239.5974 | 2     | 80.0  | P63001,Q05144 | Ras-related C3 botulinum toxin substrate 1,Ras-related C3 botulinum toxin substrate 2 |
| ALNKAIGGYPFLNGQYFIQcSK + Carbamidomethyl (C)       | 2488.2573 | 2488.2901 | 3     | 110.0 | O09043        | Napsin-A                                                                              |
| GLSRQPcLSAAcLGPEVTTQYG GLYR + Carbamidomethyl (C)  | 2780.3916 | 2780.4301 | 3     | 107.0 | Q8R146        | Acylamino-acid-releasing enzyme                                                       |
| YNDcEQGSQQLcKHGicEDLQ R + 3 Carbamidomethyl (C)    | 2873.2167 | 2737.1829 | +3;+4 | 71.0  | Q9JLB4        | Cubilin                                                                               |
| EVcGGDLHGPTGTFTSPNYPN PNPcHR + Carbamidomethyl (C) | 2917.3202 | 2917.3377 | 4     | 53.0  | Q9JLB4        | Cubilin                                                                               |
| SKGFGFVcFSSPEEATK + Carbamidomethyl (C)            | 1876.8666 | 1876.894  | 2     | 99.0  | P29341        | Polyadenylate-binding protein 1                                                       |

|                                                              |           |           |       |       |               |                                                                |
|--------------------------------------------------------------|-----------|-----------|-------|-------|---------------|----------------------------------------------------------------|
| AGGILQEDITEAcLILGVKRPEEK + Carbamidomethyl (C)               | 2735.4527 | 2735.4824 | 4     | 98.0  | Q99K67        | Alpha-aminoadipic semialdehyde synthase, mitochondrial         |
| TIAAcNLPIVQGPcR + 2 Carbamidomethyl (C)                      | 1668.844  | 1668.8619 | 2     | 95.0  | Q07456        | Protein AMBP                                                   |
| LADDVDLEQVANETHGHVGA DLAAALcSEAAALQAIR + Carbamidomethyl (C) | 3671.7849 | 3671.8334 | 4     | 60.0  | Q01853        | Transitional endoplasmic reticulum ATPase                      |
| VLGDLSEEDGcTYLK + Carbamidomethyl (C)                        | 1655.7713 | 1655.783  | 2     | 141.0 | Q99MR8        | Methylcrotonoyl-CoA carboxylase subunit alpha, mitochondrial   |
| SPPTVLVlcGPGNNGDGLVcAR + 2 Carbamidomethyl (C)               | 2377.1519 | 2377.1879 | 3     | 88.0  | Q8K4Z3        | NAD(P)H-hydrate epimerase                                      |
| VAVTEGcQPSR + Carbamidomethyl (C)                            | 1202.5714 | 1202.5767 | 2     | 45.0  | Q80X90        | Filamin-B                                                      |
| QKLYTVNAEEcAAALER + Carbamidomethyl (C)                      | 1964.9625 | 1964.9861 | +2;+3 | 87.0  | Q78JN3        | Enoyl-CoA delta isomerase 3, peroxisomal                       |
| KGcVITISGR + Carbamidomethyl (C)                             | 1089.5965 | 1089.6082 | 2     | 85.0  | Q91V12        | Cytosolic acyl coenzyme A thioester hydrolase                  |
| LGGFSWDNcDEGKDPVAVIK + Carbamidomethyl (C)                   | 2106.9681 | 2106.9682 | 3     | 100.0 | Q60648        | Ganglioside GM2 activator                                      |
| NAScTLSSAVHSQGVTR + Carbamidomethyl (C)                      | 1773.8428 | 1773.855  | 3     | 80.0  | Q99J09        | Methylosome protein 50                                         |
| DcPVPLPGDGDLLVR + Carbamidomethyl (C)                        | 1621.8134 | 1621.8175 | 2     | 104.0 | Q8BGC4        | Zinc-binding alcohol dehydrogenase domain-containing protein 2 |
| ARLTEGcSFR + Carbamidomethyl (C)                             | 1195.5768 | 1195.581  | +2;+3 | 30.0  | Q6ZWU9,Q6ZWY3 | 40S ribosomal protein S27,40S ribosomal protein S27-like       |
| RVSvcAETFNPDEEEEDNDPR + Carbamidomethyl (C)                  | 2507.0507 | 2507.0772 | 3     | 75.0  | P12367        | cAMP-dependent protein kinase type II-alpha regulatory subunit |
| LQcTYIEVEQVGK + Carbamidomethyl (C)                          | 1565.7759 | 1565.7837 | 2     | 91.0  | Q8VCA8        | Secernin-2                                                     |
| QSVAVNEscGK + Carbamidomethyl (C)                            | 1177.5397 | 1177.5382 | 2     | 77.0  | Q62523        | Zyxin                                                          |
| LAPEYEAATR                                                   | 1190.5931 | 1190.6046 | 2     | 73.0  | P27773        | Protein disulfide-isomerase A3                                 |
| KVNAEGTVDTVFSEVcTYLDSLK + Carbamidomethyl (C)                | 2574.2524 | 2574.2787 | 3     | 71.0  | Q9R0Y5        | Adenylate kinase isoenzyme 1                                   |
| SNcKPSTFAYPAPLEVPKEK + Carbamidomethyl (C)                   | 2262.1354 | 2262.1617 | 4     | 71.0  | Q3TXS7        | 26S proteasome non-ATPase regulatory subunit 1                 |
| TSADLQTNAcVTR + Carbamidomethyl (C)                          | 1435.6725 | 1435.6892 | 2     | 31.0  | Q91WU5        | Arsenite methyltransferase                                     |
| WITVGNcLHK + Carbamidomethyl (C)                             | 1226.623  | 1226.6365 | +2;+3 | 61.0  | Q8BK08        | Transmembrane protein 11, mitochondrial                        |
| LLALLPLScQKR + Carbamidomethyl (C)                           | 1410.8381 | 1410.8523 | 3     | 59.0  | Q5U4D8        | Sodium-dependent multivitamin transporter                      |



|                                                                |           |           |       |      |               |                                                                                                    |
|----------------------------------------------------------------|-----------|-----------|-------|------|---------------|----------------------------------------------------------------------------------------------------|
| AVGNIVTGTDEQTQVVLNCDV<br>LSHFPNLLSHPK                          | 3544.7984 | 3544.8379 | 4     | 56.0 | O35344        | Importin subunit alpha-4                                                                           |
| AVGNIVTGTDEQTQVVLNcDA<br>LSHFPALLTHPK +<br>Carbamidomethyl (C) | 3544.7984 | 3544.8195 | 4     | 98.0 | O35343        | Importin subunit alpha-3                                                                           |
| LLTFNPTYcVLKDLNDEER +<br>Carbamidomethyl (C)                   | 2339.1467 | 2339.1742 | 3     | 53.0 | E9Q735        | Ubiquitin conjugation factor E4 A                                                                  |
| SILEGSDEYLVcKIHYGGK +<br>Carbamidomethyl (C)                   | 2167.0619 | 2167.0805 | 4     | 51.0 | P01872        | Ig mu chain C region                                                                               |
| HYYEVScHDQGLcR + 2<br>Carbamidomethyl (C)                      | 1890.7778 | 1890.7849 | 3     | 63.0 | Q91VR5        | ATP-dependent RNA helicase DDX1                                                                    |
| GPDAASKPLVTPHTQcR +<br>Carbamidomethyl (C)                     | 1946.9996 | 1947.0206 | 3     | 49.0 | P62192        | 26S protease regulatory subunit 4                                                                  |
| NRQFSHLIETTAQAcGEYAHR<br>+ Carbamidomethyl (C)                 | 2589.2142 | 2589.2453 | 4     | 48.0 | Q924T2        | 28S ribosomal protein S2, mitochondrial                                                            |
| TIGVSNFNPLQIERILNKPLK                                          | 2450.4009 | 2450.4268 | 4     | 47.0 | P45376        | Aldose reductase                                                                                   |
| SGLHcSSNAIR +<br>Carbamidomethyl (C)                           | 1257.5884 | 1257.5947 | 3     | 47.0 | Q3UMB9        | WASH complex subunit 7                                                                             |
| cLAGKNLTHIK +<br>Carbamidomethyl (C)                           | 1253.6914 | 1253.7006 | 3     | 46.0 | Q923I7        | Sodium/glucose cotransporter 2                                                                     |
| HDPHKLVGcLVGGR +<br>Carbamidomethyl (C)                        | 1672.8468 | 1672.8505 | +3;+4 | 51.0 | Q91YT0        | NADH dehydrogenase [ubiquinone]<br>flavoprotein 1, mitochondrial                                   |
| RPVEEYEQcYLAR +<br>Carbamidomethyl (C)                         | 1711.7988 | 1711.8116 | 3     | 46.0 | Q9DBD0        | Inhibitor of carbonic anhydrase                                                                    |
| RLDTSLGcPR +<br>Carbamidomethyl (C)                            | 1173.5924 | 1173.6029 | 2     | 45.0 | Q78J03        | Methionine-R-sulfoxide reductase B2,<br>mitochondrial                                              |
| IKNVdcVLLAR +<br>Carbamidomethyl (C)                           | 1299.7333 | 1299.7463 | 3     | 44.0 | Q9CQ65        | S-methyl-5'-thioadenosine phosphorylase                                                            |
| TRENEcHFYAGGQVYPGEASR<br>+ Carbamidomethyl (C)                 | 2427.0662 | 2427.0799 | 3     | 44.0 | O08807        | Peroxiredoxin-4                                                                                    |
| AVSTcAHLFWSGR +<br>Carbamidomethyl (C)                         | 1490.7089 | 1490.7265 | +2;+3 | 40.0 | Q9EQH3        | Vacuolar protein sorting-associated<br>protein 35                                                  |
| cRIVLR + Carbamidomethyl<br>(C)                                | 815.48    | 815.4862  | 2     | 39.0 | O35657        | Sialidase-1                                                                                        |
| AcIPFLKK +<br>Carbamidomethyl (C)                              | 975.5575  | 975.5626  | +2;+3 | 44.0 | Q2TPA8        | Hydroxysteroid dehydrogenase-like<br>protein 2                                                     |
| ARFEELcSDLFR +<br>Carbamidomethyl (C)                          | 1541.7296 | 1541.7449 | 3     | 39.0 | P17879,Q61696 | Heat shock 70 kDa protein 1B,Heat shock<br>70 kDa protein 1A                                       |
| KIPGFcEGGFQIK +<br>Carbamidomethyl (C)                         | 1479.7544 | 1479.7749 | 3     | 38.0 | Q9QZ19        | Serine incorporator 3                                                                              |
| RGS�cSGcQKPITGR + 2<br>Carbamidomethyl (C)                     | 1743.8509 | 1743.8635 | 3     | 53.0 | Q8VI36        | Paxillin                                                                                           |
| NGFVVLKGRPcK +<br>Carbamidomethyl (C)                          | 1373.7602 | 1373.7711 | 3     | 36.0 | Q8BGY2,P63242 | Eukaryotic translation initiation factor 5A-<br>2,Eukaryotic translation initiation factor<br>5A-1 |

|                                                    |           |           |          |       |               |                                                           |
|----------------------------------------------------|-----------|-----------|----------|-------|---------------|-----------------------------------------------------------|
| KTRPDGNCfYR + Carbamidomethyl (C)                  | 1412.6619 | 1412.6661 | 3        | 43.0  | Q7TQI3        | Ubiquitin thioesterase OTUB1                              |
| TPTIFLVILcLGV + Carbamidomethyl (C)                | 1444.8364 | 1444.8585 | 3        | 33.0  | P13438        | Trophoblast-specific protein alpha                        |
| KSAYcPYSR + Carbamidomethyl (C)                    | 1130.5179 | 1130.5175 | 2        | 56.0  | P56389        | Cytidine deaminase                                        |
| MRNWLVLlLcPcVLGAAL + 2 Carbamidomethyl (C)         | 2053.0675 | 2053.0642 | 2        | 32.0  | Q8BG28        | UDP-GalNAc:beta-1,3-N-acetylgalactosaminyltransferase 2   |
| ScGKDGfHIR + Carbamidomethyl (C)                   | 1175.5506 | 1175.5766 | 2        | 31.0  | Q6ZWW3,P86048 | 60S ribosomal protein L10,60S ribosomal protein L10-like  |
| YREALAA                                            | 792.413   | 792.386   | 1        | 32.0  | D3YY23        | LON peptidase N-terminal domain and RING finger protein 1 |
| SVSVLSSLQLKCYR                                     | 1680.9233 | 1680.99   | 4        | 32.0  | Q64446        | Copper-transporting ATPase 2                              |
| YICPHAPVM                                          | 1029.4776 | 1029.5078 | 2        | 31.0  | P97823        | Acyl-protein thioesterase 1                               |
| AIIFVVPVQLK                                        | 1336.8482 | 1336.8615 | 2        | 49.0  | P62082        | 40S ribosomal protein S7                                  |
| AVILGPPGSGKGTVcER + Carbamidomethyl (C)            | 1696.8931 | 1696.8998 | 3        | 77.0  | Q9WUR9        | Adenylate kinase 4, mitochondrial                         |
| cNRYLPTDTLLNHMLIHGLScP YcR + 3 Carbamidomethyl (C) | 3307.5399 | 3307.6441 | 3        | 30.0  | Q9Z103        | Activity-dependent neuroprotector homeobox protein        |
| cTQPEPHGSPVSR + Carbamidomethyl (C)                | 1450.6623 | 1450.6587 | 3        | 53.0  | Q3U2A8        | Valine--tRNA ligase, mitochondrial                        |
| GHYLHEVAR                                          | 1080.5465 | 1080.5517 | 3        | 56.0  | P07724        | Serum albumin                                             |
| QYLQKcSYDEHAK + Carbamidomethyl (C)                | 1668.7566 | 1668.7572 | +3;+4    | 47.0  | P07724        | Serum albumin                                             |
| AETFTFHSDICTLPEK                                   | 1837.8557 | 1837.8641 | 3        | 55.0  | P07724        | Serum albumin                                             |
| TPVSEHVTKcCSGLVER + Carbamidomethyl (C)            | 1987.9456 | 1987.9651 | +2;+3;+4 | 141.0 | P07724        | Serum albumin                                             |
| TNCDLYEKLGEYGFQNAILVR                              | 2445.1998 | 2445.197  | +2;+3    | 133.0 | P07724        | Serum albumin                                             |
| FVGCALSSNIQR                                       | 1293.6499 | 1293.6512 | 2        | 125.0 | P17563,Q63836 | Selenium-binding protein 1,Selenium-binding protein 2     |
| FVGcALSSNIQR + Carbamidomethyl (C)                 | 1350.6714 | 1350.6741 | 2        | 121.0 | P17563,Q63836 | Selenium-binding protein 1,Selenium-binding protein 2     |
| FLHDPSATQGFVGC                                     | 1477.666  | 1477.6676 | 2        | 76.0  | P17563,Q63836 | Selenium-binding protein 1,Selenium-binding protein 2     |
| GGSVQVLEDQELTCQPEPLVVK                             | 2367.1992 | 2367.2323 | 3        | 37.0  | P17563,Q63836 | Selenium-binding protein 1,Selenium-binding protein 2     |
| cKAAVLWELHKPFTIEDIEVAP PK + Carbamidomethyl (C)    | 2790.4778 | 2790.5024 | 4        | 67.0  | P00329        | Alcohol dehydrogenase 1                                   |
| YISGFGNEcASEDPRCPGSLPK + Carbamidomethyl (C)       | 2451.0835 | 2451.0998 | 3        | 39.0  | O09173        | Homogentisate 1,2-dioxygenase                             |

|                                                    |           |           |          |       |               |                                                                                                    |
|----------------------------------------------------|-----------|-----------|----------|-------|---------------|----------------------------------------------------------------------------------------------------|
| AIVAGDEVAQEVDVAPDcSFLK + Carbamidomethyl (C)       | 2403.1628 | 2403.1976 | +2;+3    | 134.0 | Q8K0L3        | Acyl-coenzyme A synthetase ACSM2, mitochondrial                                                    |
| cTTNcLAPLAK + 2 Carbamidomethyl (C)                | 1315.6264 | 1315.6282 | 2        | 59.0  | P16858,Q64467 | Glyceraldehyde-3-phosphate dehydrogenase,Glyceraldehyde-3-phosphate dehydrogenase, testis-specific |
| ASCTTnLAPLAK + Carbamidomethyl (C)                 | 1416.6741 | 1416.6776 | 2        | 96.0  | P16858,Q64467 | Glyceraldehyde-3-phosphate dehydrogenase,Glyceraldehyde-3-phosphate dehydrogenase, testis-specific |
| EGVVEcSFVQSK + Carbamidomethyl (C)                 | 1367.6391 | 1367.652  | 2        | 70.0  | P08249        | Malate dehydrogenase, mitochondrial                                                                |
| NSCAAEDKATHPLPK                                    | 1580.7617 | 1580.7686 | +2;+3;+4 | 104.0 | Q9D964        | Glycine amidinotransferase, mitochondrial                                                          |
| HPHDIIDINSGAVEcPAS + Carbamidomethyl (C)           | 2045.9113 | 2045.9302 | 2        | 93.0  | P35979        | 60S ribosomal protein L12                                                                          |
| VSCLWGK                                            | 791.4     | 791.4082  | 2        | 56.0  | P02088        | Hemoglobin subunit beta-1                                                                          |
| VScLWGK + Carbamidomethyl (C)                      | 848.4215  | 848.4305  | 2        | 45.0  | P02088        | Hemoglobin subunit beta-1                                                                          |
| CVTEPSAGSDVAAIK                                    | 1446.7024 | 1446.7149 | 2        | 111.0 | P45952        | Medium-chain specific acyl-CoA dehydrogenase, mitochondrial                                        |
| HHTCYPR                                            | 912.4025  | 912.4057  | 3        | 37.0  | A2ARV4        | Low-density lipoprotein receptor-related protein 2                                                 |
| QPSSPNPCASATcSHLcLLSAQEP R + 2 Carbamidomethyl (C) | 2710.2261 | 2710.2576 | 3        | 91.0  | A2ARV4        | Low-density lipoprotein receptor-related protein 2                                                 |
| AcSLVR + Carbamidomethyl (C)                       | 704.3639  | 704.3687  | 2        | 50.0  | Q9JHW2        | Omega-amidase NIT2                                                                                 |
| QGANIVSLPECFNSPYGTTYFPDYAEK                        | 3010.3695 | 3010.4011 | 3        | 129.0 | Q9JHW2        | Omega-amidase NIT2                                                                                 |
| MDcQEcPEGYR + 2 Carbamidomethyl (C)                | 1511.5479 | 1511.5634 | 2        | 53.0  | Q8BTM8        | Filamin-A                                                                                          |
| IEcDDKGDGScDVR + 2 Carbamidomethyl (C)             | 1692.672  | 1692.6738 | 3        | 44.0  | Q8BTM8,Q8VHX6 | Filamin-A,Filamin-C                                                                                |
| AVVKTFHETLNcGSNALTTLT TTILR + Carbamidomethyl (C)  | 2963.5209 | 2963.5542 | 4        | 38.0  | P35762        | CD81 antigen                                                                                       |
| AVVKTFHETLNcGSNALTTLT TTILR + Carbamidomethyl (C)  | 2963.5209 | 2963.5688 | +3;+4    | 52.0  | P35762        | CD81 antigen                                                                                       |
| GVYAVGDVCGK                                        | 1066.5117 | 1066.5151 | 2        | 81.0  | P47791        | Glutathione reductase, mitochondrial                                                               |
| cATPPDDGNLCR + Carbamidomethyl (C)                 | 1385.5704 | 1385.5782 | 2        | 62.0  | Q64442        | Sorbitol dehydrogenase                                                                             |
| DLEQGVVGAHGLLcR + Carbamidomethyl (C)              | 1622.8199 | 1622.8346 | 3        | 62.0  | Q91253        | Glyoxylate reductase/hydroxypyruvate reductase                                                     |
| VVTALCLLR                                          | 986.5947  | 986.6019  | 2        | 74.0  | Q64462        | Cytochrome P450 4B1                                                                                |
| VVTALcLLR + Carbamidomethyl (C)                    | 1043.6161 | 1043.6247 | 2        | 65.0  | Q64462        | Cytochrome P450 4B1                                                                                |

|                                                         |           |           |       |       |        |                                                                    |
|---------------------------------------------------------|-----------|-----------|-------|-------|--------|--------------------------------------------------------------------|
| ARAGESVLVHGASGGVGLATC<br>QIAR                           | 2379.2441 | 2379.265  | 4     | 42.0  | P47199 | Quinone oxidoreductase                                             |
| YQKPVVAIQGVALGGGLELA<br>LGcHYR + Carbamidomethyl<br>(C) | 2839.5167 | 2839.533  | +3;+4 | 141.0 | Q9DBM2 | Peroxisomal bifunctional enzyme                                    |
| FPTLEHcTTGGESLLPEEYEQW<br>K + Carbamidomethyl (C)       | 2750.2534 | 2750.2665 | 3     | 101.0 | Q91VA0 | Acyl-coenzyme A synthetase ACSM1,<br>mitochondrial                 |
| LLACIASRPGQcGR +<br>Carbamidomethyl (C)                 | 1568.7915 | 1568.793  | +2;+3 | 67.0  | P62242 | 40S ribosomal protein S8                                           |
| CIITDDTLAPAVDAVAAK                                      | 1785.9182 | 1785.9398 | 2     | 91.0  | Q3UNX5 | Acyl-coenzyme A synthetase ACSM3,<br>mitochondrial                 |
| DPHLACVAYER                                             | 1272.5921 | 1272.603  | 3     | 36.0  | Q68FD5 | Clathrin heavy chain 1                                             |
| RDPHLACVAYER                                            | 1428.6932 | 1428.6896 | +2;+3 | 74.0  | Q68FD5 | Clathrin heavy chain 1                                             |
| LAcRPFHPER +<br>Carbamidomethyl (C)                     | 1281.64   | 1281.6479 | 4     | 38.0  | Q9D404 | 3-oxoacyl-[acyl-carrier-protein] synthase,<br>mitochondrial        |
| GNHNSVSTACTTGAHAVGDSF<br>R                              | 2170.9814 | 2171.006  | 3     | 114.0 | Q9D404 | 3-oxoacyl-[acyl-carrier-protein] synthase,<br>mitochondrial        |
| cLTVLSLQESGLKVNQPASFAIR<br>+ Carbamidomethyl (C)        | 2530.3577 | 2530.3479 | 3     | 35.0  | Q80X90 | Filamin-B                                                          |
| LFcVGFTK +<br>Carbamidomethyl (C)                       | 970.4946  | 970.5047  | 2     | 73.0  | P97351 | 40S ribosomal protein S3a                                          |
| FGCQVAGK                                                | 808.3902  | 808.3966  | 2     | 67.0  | P97328 | Ketohexokinase                                                     |
| FGCQVAGK                                                | 936.4851  | 936.4842  | +2;+3 | 66.0  | P97328 | Ketohexokinase                                                     |
| RGPcIIYNEDNGIIK +<br>Carbamidomethyl (C)                | 1760.8879 | 1760.8976 | +2;+3 | 97.0  | Q9D8E6 | 60S ribosomal protein L4                                           |
| CFGGLQK                                                 | 751.3687  | 751.3756  | 2     | 33.0  | Q9R0P3 | S-formylglutathione hydrolase                                      |
| AYDATCLVK                                               | 982.4794  | 982.4883  | 2     | 72.0  | Q9R0P3 | S-formylglutathione hydrolase                                      |
| VAPEEVSEVIFGHVLTAGCGQ<br>NPTR                           | 2609.2908 | 2609.322  | 3     | 116.0 | Q8CAY6 | Acetyl-CoA acetyltransferase, cytosolic                            |
| TVFAEHISDECK                                            | 1377.6235 | 1377.6299 | +2;+3 | 83.0  | P27659 | 60S ribosomal protein L3                                           |
| FRISLGLPVGAVINCADNTGAK                                  | 2215.1783 | 2215.191  | 3     | 122.0 | P62830 | 60S ribosomal protein L23                                          |
| HcDDSYPTR +<br>Carbamidomethyl (C)                      | 1149.4509 | 1149.4533 | 2     | 42.0  | P36552 | Oxygen-dependent coproporphyrinogen-<br>III oxidase, mitochondrial |
| EACDQHGPDIYPK                                           | 1471.6402 | 1471.6378 | +2;+3 | 46.0  | P36552 | Oxygen-dependent coproporphyrinogen-<br>III oxidase, mitochondrial |
| SLPcILNAR +<br>Carbamidomethyl (C)                      | 1042.5593 | 1042.565  | 2     | 68.0  | P16125 | L-lactate dehydrogenase B chain                                    |
| DFESCLGAK                                               | 968.4273  | 968.4321  | 2     | 56.0  | P28271 | Cytoplasmic aconitate hydratase                                    |
| HTGPGILSMANAGPNTNGSQF<br>FICTAK                         | 2733.3003 | 2733.3064 | 3     | 163.0 | P17742 | Peptidyl-prolyl cis-trans isomerase A                              |
| KCPFTGNVSIR                                             | 1220.6336 | 1220.6316 | +2;+3 | 79.0  | P62281 | 40S ribosomal protein S11                                          |

|                                                       |           |           |          |       |                      |                                                                     |
|-------------------------------------------------------|-----------|-----------|----------|-------|----------------------|---------------------------------------------------------------------|
| NMSVHLSPcFR + Carbamidomethyl (C)                     | 1346.6224 | 1346.625  | +2;+3    | 61.0  | P62281               | 40S ribosomal protein S11                                           |
| DVGAETLLHSCK                                          | 1271.618  | 1271.6316 | +2;+3    | 79.0  | Q9D1A2               | Cytosolic non-specific dipeptidase                                  |
| ECLAcR + Carbamidomethyl (C)                          | 818.3415  | 818.3404  | 2        | 43.0  | Q99LB7               | Sarcosine dehydrogenase, mitochondrial                              |
| AQCVIASR                                              | 846.4382  | 846.4398  | 2        | 70.0  | Q9CQ62               | 2,4-dienoyl-CoA reductase, mitochondrial                            |
| ESSYACYDEER                                           | 1513.5667 | 1513.5695 | 2        | 110.0 | O89017               | Legumain                                                            |
| ESSYAcYDEER + Carbamidomethyl (C)                     | 1570.5882 | 1570.6048 | 2        | 104.0 | O89017               | Legumain                                                            |
| DLEEDHACIPIKK                                         | 1509.7497 | 1509.7551 | +2;+3;+4 | 64.0  | P58252               | Elongation factor 2                                                 |
| TKTGVGYPLSAVIEcADSAHGLK + Carbamidomethyl (C)         | 2501.2584 | 2501.2658 | 3        | 40.0  | Q9DCZ1               | GMP reductase 1                                                     |
| QLTEHAVEGDCDFHILK + Carbamidomethyl (C)               | 2010.9469 | 2010.9555 | +3;+4    | 94.0  | P29699               | Alpha-2-HS-glycoprotein                                             |
| cKDISSAVQANPALTELSLR + Carbamidomethyl (C)            | 2172.1208 | 2172.1404 | 3        | 64.0  | Q91VI7               | Ribonuclease inhibitor                                              |
| TNELGDGGVGLVLQGLQNPTcK + Carbamidomethyl (C)          | 2269.1373 | 2269.173  | +2;+3    | 129.0 | Q91VI7               | Ribonuclease inhibitor                                              |
| INSITVDNcK + Carbamidomethyl (C)                      | 1162.5652 | 1162.5768 | 2        | 83.0  | P40124               | Adenylyl cyclase-associated protein 1                               |
| LALNCVGGK                                             | 873.4742  | 873.4753  | 2        | 81.0  | Q9DCS3               | Trans-2-enoyl-CoA reductase, mitochondrial                          |
| LALNcVGGK + Carbamidomethyl (C)                       | 930.4957  | 930.501   | 2        | 61.0  | Q9DCS3               | Trans-2-enoyl-CoA reductase, mitochondrial                          |
| DIPLQSAATLGVNpCTAYR + Carbamidomethyl (C)             | 2046.0204 | 2046.058  | 2        | 139.0 | Q9DCS3               | Trans-2-enoyl-CoA reductase, mitochondrial                          |
| AIAISDLQEEFISpCGAcR + 2 Carbamidomethyl (C)           | 2291.0562 | 2291.079  | +2;+3    | 156.0 | P56389               | Cytidine deaminase                                                  |
| SLVANLAAANcYKK + Carbamidomethyl (C)                  | 1521.7973 | 1521.8051 | +2;+3    | 92.0  | P55264               | Adenosine kinase                                                    |
| SPYcITK + Carbamidomethyl (C)                         | 867.416   | 867.416   | 2        | 55.0  | Q80XN0               | D-beta-hydroxybutyrate dehydrogenase, mitochondrial                 |
| METycNSGSTDTSSVINAVTHALTAATPYTR + Carbamidomethyl (C) | 3318.5133 | 3318.5428 | 3        | 200.0 | Q80XN0               | D-beta-hydroxybutyrate dehydrogenase, mitochondrial                 |
| TIQFVDWCPTGFKVGINYQPP TVVPGDLAK                       | 3346.7061 | 3346.7611 | 3        | 70.0  | P68369,P05214,P68373 | Tubulin alpha-1A chain,Tubulin alpha-3 chain,Tubulin alpha-1C chain |
| cFSFGIGQGASTSLIK + Carbamidomethyl (C)                | 1671.8291 | 1671.8457 | 2        | 115.0 | Q99KC8               | von Willebrand factor A domain-containing protein 5A                |
| VSHALAEGLGVIACIGEK + Carbamidomethyl (C)              | 1822.9611 | 1822.9763 | 3        | 44.0  | P17751               | Triosephosphate isomerase                                           |
| LGGEVSLVAGTK                                          | 1232.6435 | 1232.6457 | 2        | 99.0  | Q99LC5               | Electron transfer flavoprotein subunit alpha, mitochondrial         |
| LYTVNAEECAAALER                                       | 1651.7875 | 1651.8008 | 2        | 119.0 | Q78JN3               | Enoyl-CoA delta isomerase 3, peroxisomal                            |

|                                                          |           |           |       |       |               |                                                                                       |
|----------------------------------------------------------|-----------|-----------|-------|-------|---------------|---------------------------------------------------------------------------------------|
| CATITPDEKR                                               | 1132.5546 | 1132.5554 | +2;+3 | 70.0  | O88844        | Isocitrate dehydrogenase [NADP] cytoplasmic                                           |
| AGAPPGLFNVVQGGGAATGQFLCHHR                               | 2504.2496 | 2504.2505 | 4     | 94.0  | Q9JLJ2        | 4-trimethylaminobutyraldehyde dehydrogenase                                           |
| IRDESAScSWNK + Carbamidomethyl (C)                       | 1451.6463 | 1451.6584 | +2;+3 | 69.0  | Q3TNA1        | Xylulose kinase                                                                       |
| TAVTAAGTPcQGWAAQEPHR + Carbamidomethyl (C)               | 2107.9858 | 2108.0017 | 3     | 101.0 | P20918        | Plasminogen                                                                           |
| AILPCQDTPSVK                                             | 1270.6591 | 1270.6655 | 2     | 98.0  | P24527        | Leukotriene A-4 hydrolase                                                             |
| VACETVAK                                                 | 819.416   | 819.4185  | 2     | 60.0  | Q3TH56        | S-adenosylmethionine synthase isoform type-2                                          |
| TcLLNETGDEPFQYK + Carbamidomethyl (C)                    | 1813.8193 | 1813.8328 | 2     | 85.0  | P15105        | Glutamine synthetase                                                                  |
| RPSANCDPYAVTEAIVR                                        | 1860.9152 | 1860.9451 | +2;+3 | 97.0  | P15105        | Glutamine synthetase                                                                  |
| VKELNNVcEPVVTQPKPK + Carbamidomethyl (C)                 | 2078.1194 | 2078.1324 | 3     | 73.0  | Q61699        | Heat shock protein 105 kDa                                                            |
| cAADLGLK + Carbamidomethyl (C)                           | 846.4269  | 846.4303  | 2     | 76.0  | P70349        | Histidine triad nucleotide-binding protein 1                                          |
| AVLCPPPVK                                                | 922.531   | 922.5393  | 2     | 53.0  | P63001,P60764 | Ras-related C3 botulinum toxin substrate 1,Ras-related C3 botulinum toxin substrate 3 |
| HHCPNTPILVGTK                                            | 1528.8184 | 1528.8173 | +2;+3 | 64.0  | P63001        | Ras-related C3 botulinum toxin substrate 1                                            |
| LVVPATQCGSLIGK                                           | 1384.7748 | 1384.7883 | 2     | 98.0  | P60335        | Poly(rC)-binding protein 1                                                            |
| ALcTELKQPLTIQEVA PRPVG P QEV R + Carbamidomethyl (C)     | 2928.5855 | 2928.6098 | 4     | 50.0  | Q3UNZ8        | Quinone oxidoreductase-like protein 2                                                 |
| VNPLGGAIALGHPLGcTGAR + Carbamidomethyl (C)               | 1930.0207 | 1930.0328 | 3     | 93.0  | Q8VCH0,Q921H8 | 3-ketoacyl-CoA thiolase B, peroxisomal,3-ketoacyl-CoA thiolase A, peroxisomal         |
| LPAcVVDcGTGYTK + 2 Carbamidomethyl (C)                   | 1607.7324 | 1607.7356 | 2     | 89.0  | Q99JY9        | Actin-related protein 3                                                               |
| AVATLQGEGLSVTGIVcHVGK + Carbamidomethyl (C)              | 2095.1096 | 2095.1181 | 3     | 94.0  | Q99LB2        | Dehydrogenase/reductase SDR family member 4                                           |
| TVVNISSLCALQP YK G W G L Y c A G K + Carbamidomethyl (C) | 2695.3502 | 2695.3897 | 3     | 51.0  | Q64105        | Sepiapterin reductase                                                                 |

|                                       |           |           |       |       |                                    |                                                                                                                                                                                                                                                                 |
|---------------------------------------|-----------|-----------|-------|-------|------------------------------------|-----------------------------------------------------------------------------------------------------------------------------------------------------------------------------------------------------------------------------------------------------------------|
| IAGLCNR                               | 745.3905  | 745.3901  | 2     | 53.0  | Q8VDN2,Q9WV27,Q6PIC6,Q6PIE5        | Sodium/potassium-transporting ATPase subunit alpha-1,Sodium/potassium-transporting ATPase subunit alpha-4,Sodium/potassium-transporting ATPase subunit alpha-3,Sodium/potassium-transporting ATPase subunit alpha-2                                             |
| LIIVEGCQR                             | 1029.5641 | 1029.5727 | 2     | 72.0  | Q8VDN2,Q9WV27,Q6PIC6,Q6PIE5,Q9Z1W8 | Sodium/potassium-transporting ATPase subunit alpha-1,Sodium/potassium-transporting ATPase subunit alpha-4,Sodium/potassium-transporting ATPase subunit alpha-3,Sodium/potassium-transporting ATPase subunit alpha-2,Potassium-transporting ATPase alpha chain 2 |
| NILGGTVFREPIICK                       | 1658.9178 | 1658.9287 | +2;+3 | 73.0  | P54071                             | Isocitrate dehydrogenase [NADP], mitochondrial                                                                                                                                                                                                                  |
| NILGGTVFREPIICK + Carbamidomethyl (C) | 1715.9393 | 1715.9523 | 2     | 65.0  | P54071                             | Isocitrate dehydrogenase [NADP], mitochondrial                                                                                                                                                                                                                  |
| SSAATANASSASCSR                       | 1369.5892 | 1369.5872 | 2     | 98.0  | Q8BMK4                             | Cytoskeleton-associated protein 4                                                                                                                                                                                                                               |
| NINNDTTYcIK + Carbamidomethyl (C)     | 1354.6187 | 1354.6313 | 2     | 67.0  | Q99KR3                             | Endoribonuclease LACTB2                                                                                                                                                                                                                                         |
| STEcAHPGVVEK + Carbamidomethyl (C)    | 1312.6082 | 1312.612  | +2;+3 | 85.0  | O88575                             | Sodium- and chloride-dependent transporter XTRP3B                                                                                                                                                                                                               |
| LcDPSVK + Carbamidomethyl (C)         | 817.4004  | 817.4067  | 2     | 41.0  | Q922Q1                             | Mitochondrial amidoxime reducing component 2                                                                                                                                                                                                                    |
| NCVAIAADRR                            | 1087.5556 | 1087.5619 | +2;+3 | 66.0  | Q9R1P1                             | Proteasome subunit beta type-3                                                                                                                                                                                                                                  |
| NcVAIAADRR + Carbamidomethyl (C)      | 1144.5771 | 1144.5755 | +2;+3 | 42.0  | Q9R1P1                             | Proteasome subunit beta type-3                                                                                                                                                                                                                                  |
| YLVVNADEGEPGTCK                       | 1593.7345 | 1593.7514 | 2     | 107.0 | Q91YT0                             | NADH dehydrogenase [ubiquinone] flavoprotein 1, mitochondrial                                                                                                                                                                                                   |

|                                                        |           |           |          |       |               |                                                                                                                 |
|--------------------------------------------------------|-----------|-----------|----------|-------|---------------|-----------------------------------------------------------------------------------------------------------------|
| VWCTSLHPELVR                                           | 1438.7391 | 1438.7479 | +2;+3    | 85.0  | Q91WR5        | Aldo-keto reductase family 1 member C21                                                                         |
| YKPVcNQVEcHPYLNQMK + 2 Carbamidomethyl (C)             | 2375.0861 | 2375.1013 | +3;+4    | 75.0  | Q91WR5        | Aldo-keto reductase family 1 member C21                                                                         |
| AAcLESAQEPAGAWSNK + Carbamidomethyl (C)                | 1788.8101 | 1788.8228 | 2        | 107.0 | Q8VDJ3        | Vigilin                                                                                                         |
| cREVAENcK + 2 Carbamidomethyl (C)                      | 1232.5278 | 1232.5368 | 2        | 43.0  | Q9D6R2        | Isocitrate dehydrogenase [NAD] subunit alpha, mitochondrial                                                     |
| GIFPVLcK + Carbamidomethyl (C)                         | 932.5154  | 932.5205  | 2        | 39.0  | P52480        | Pyruvate kinase PKM                                                                                             |
| GKTEIQVNCPK                                            | 1215.6281 | 1215.6386 | 2        | 78.0  | O09117        | Synaptophysin-like protein 1                                                                                    |
| FHDFLGDSWGILFSHPDFTPVcTTELGR + Carbamidomethyl (C)     | 3406.6194 | 3406.7341 | 3        | 41.0  | O08709        | Peroxioredoxin-6                                                                                                |
| cDILIPAASEK + Carbamidomethyl (C)                      | 1215.6169 | 1215.6309 | 2        | 48.0  | P26443        | Glutamate dehydrogenase 1, mitochondrial                                                                        |
| QVLVAPGNAGTAcAGK + Carbamidomethyl (C)                 | 1512.7719 | 1512.7837 | 2        | 98.0  | Q64737        | Trifunctional purine biosynthetic protein adenosine-3                                                           |
| GLSLPPACTR                                             | 1013.5328 | 1013.5372 | 2        | 57.0  | P30275        | Creatine kinase U-type, mitochondrial                                                                           |
| LAcGIAR + Carbamidomethyl (C)                          | 872.4902  | 872.4913  | 2        | 71.0  | Q9WU84        | Copper chaperone for superoxide dismutase                                                                       |
| YKPAVNQIECHPYLTQEK                                     | 2160.0673 | 2160.1016 | +2;+3;+4 | 85.0  | P45376        | Aldose reductase                                                                                                |
| VTGTQFPEAPLPVPCNPNDVSHGYVTVKPGIR + Carbamidomethyl (C) | 3445.7453 | 3445.7833 | 4        | 59.0  | P34914        | Bifunctional epoxide hydrolase 2                                                                                |
| NRQPPDSGPMcDLLWSDPQPQNGR + Carbamidomethyl (C)         | 2764.2446 | 2764.2322 | 3        | 89.0  | Q60676        | Serine/threonine-protein phosphatase 5                                                                          |
| IIHEDGYSEEECR                                          | 1578.662  | 1578.6773 | 3        | 30.0  | P08752        | Guanine nucleotide-binding protein G(i) subunit alpha-2                                                         |
| EIYHTFcATDTK + Carbamidomethyl (C)                     | 1585.7083 | 1585.7262 | +2;+3    | 92.0  | P08752,B2RSH2 | Guanine nucleotide-binding protein G(i) subunit alpha-2,Guanine nucleotide-binding protein G(i) subunit alpha-1 |
| LLFCTGK                                                | 780.4204  | 780.4278  | 2        | 54.0  | Q60597        | 2-oxoglutarate dehydrogenase, mitochondrial                                                                     |
| NLADcLR + Carbamidomethyl (C)                          | 860.4174  | 860.4254  | 2        | 60.0  | Q9R1P3        | Proteasome subunit beta type-2                                                                                  |
| LGTVADcGVPEAR + Carbamidomethyl (C)                    | 1343.6504 | 1343.6542 | 2        | 107.0 | Q8BWF0        | Succinate-semialdehyde dehydrogenase, mitochondrial                                                             |
| ALAGCDFLTISPK                                          | 1334.6904 | 1334.692  | 2        | 91.0  | Q93092        | Transaldolase                                                                                                   |
| VcGGFACSR + Carbamidomethyl (C)                        | 955.4004  | 955.4076  | 2        | 62.0  | Q9CQ88        | Tetraspanin-31                                                                                                  |



|                                               |           |           |          |       |               |                                                                     |
|-----------------------------------------------|-----------|-----------|----------|-------|---------------|---------------------------------------------------------------------|
| VAVVAGYGDVGKcAQALR + Carbamidomethyl (C)      | 1889.9782 | 1889.9949 | 3        | 64.0  | P50247        | Adenosylhomocysteinase                                              |
| TATAVAHCK                                     | 900.4487  | 900.4501  | +2;+3    | 76.0  | P14131        | 40S ribosomal protein S16                                           |
| KTATAVAHCK                                    | 1028.5437 | 1028.5413 | 3        | 69.0  | P14131        | 40S ribosomal protein S16                                           |
| KTATAVAHCK + Carbamidomethyl (C)              | 1085.5652 | 1085.568  | +2;+3    | 59.0  | P14131        | 40S ribosomal protein S16                                           |
| VNCLDKYWVK                                    | 1304.6336 | 1304.6499 | 3        | 33.0  | Q9DC07        | LIM zinc-binding domain-containing Nebulette                        |
| YNPTWHcIVGR + Carbamidomethyl (C)             | 1401.6612 | 1401.6781 | +2;+3    | 75.0  | P63168,Q9D0M5 | Dynein light chain 1, cytoplasmic,Dynein light chain 2, cytoplasmic |
| YICGEAPDYDR                                   | 1300.5394 | 1300.5446 | 2        | 88.0  | P48774        | Glutathione S-transferase Mu 5                                      |
| cTVPFDKETGFHR + Carbamidomethyl (C)           | 1592.7406 | 1592.7416 | +3;+4    | 78.0  | Q9D8T7        | SRA stem-loop-interacting RNA-binding protein, mitochondrial        |
| TPHCFLTGHAEK                                  | 1396.6558 | 1396.6675 | 4        | 35.0  | Q8C0M9        | Isoaspartyl peptidase/L-asparaginase                                |
| GFGHIGIAPDVYSAcK + Carbamidomethyl (C)        | 1789.8822 | 1789.9043 | +2;+3    | 65.0  | Q9CPU0        | Lactoylglutathione lyase                                            |
| NKDVLQAETSQQLcCQK + Carbamidomethyl (C)       | 2059.9667 | 2059.9847 | 3        | 82.0  | Q6P8X1        | Sorting nexin-6                                                     |
| cPSIILDKDGQVR + Carbamidomethyl (C)           | 1499.7766 | 1499.7842 | +2;+3    | 108.0 | Q60928        | Gamma-glutamyltranspeptidase 1                                      |
| SPcYIDR + Carbamidomethyl (C)                 | 909.4014  | 909.4007  | 2        | 47.0  | P47740        | Fatty aldehyde dehydrogenase                                        |
| YSFDTFSHQRPcLLK + Carbamidomethyl (C)         | 1897.9145 | 1897.926  | +3;+4    | 58.0  | P47740        | Fatty aldehyde dehydrogenase                                        |
| SILcCLR + Carbamidomethyl (C)                 | 931.4619  | 931.4695  | 2        | 48.0  | Q9R0Q7        | Prostaglandin E synthase 3                                          |
| ASILGFAcK + Carbamidomethyl (C)               | 965.5004  | 965.5105  | 2        | 44.0  | P16406        | Glutamyl aminopeptidase                                             |
| ERPAPAVSSTcATAEDSSVLYSR + Carbamidomethyl (C) | 2453.1492 | 2453.165  | 3        | 105.0 | Q8CGC7        | Bifunctional glutamate/proline--tRNA ligase                         |
| cAWGQQPDLAANEaQLLR + Carbamidomethyl (C)      | 2039.9847 | 2040.0096 | 2        | 75.0  | Q9WVJ2        | 26S proteasome non-ATPase regulatory subunit 13                     |
| LVVGDNSPAVDVVEcNSK + Carbamidomethyl (C)      | 1971.9572 | 1971.9776 | 2        | 102.0 | Q62433        | Protein NDRG1                                                       |
| YHTVNGHNCEVR                                  | 1427.6364 | 1427.6429 | +2;+3;+4 | 74.0  | P49312        | Heterogeneous nuclear ribonucleoprotein A1                          |
| cTVGLR + Carbamidomethyl (C)                  | 704.364   | 704.3689  | 2        | 33.0  | Q6P3A8        | 2-oxoisovalerate dehydrogenase subunit beta, mitochondrial          |
| HPATTCSPR                                     | 968.4498  | 968.4506  | 2        | 32.0  | Q8K010        | 5-oxoprolinase                                                      |
| SGLFVVGPEsAGAHGPACYR                          | 2070.9946 | 2071.015  | 3        | 72.0  | Q8K010        | 5-oxoprolinase                                                      |
| cLALATHDNPLKR + Carbamidomethyl (C)           | 1507.7929 | 1507.8054 | 3        | 72.0  | O55143        | Sarcoplasmic/endoplasmic reticulum calcium ATPase 2                 |
| cDLVLDAaHEK + Carbamidomethyl (C)             | 1269.6023 | 1269.6184 | 2        | 71.0  | O70305        | Ataxin-2                                                            |
| LcSGVLGTVVHGK + Carbamidomethyl (C)           | 1325.7126 | 1325.7184 | 3        | 74.0  | Q791V5        | Mitochondrial carrier homolog 2                                     |

|                                                              |           |           |          |      |               |                                                                 |
|--------------------------------------------------------------|-----------|-----------|----------|------|---------------|-----------------------------------------------------------------|
| AcHQLHQEGK + Carbamidomethyl (C)                             | 1206.5564 | 1206.5586 | 3        | 59.0 | Q8CG76        | Aflatoxin B1 aldehyde reductase member 2                        |
| KPVVPGHVLVcPLRPVER + Carbamidomethyl (C)                     | 2051.1826 | 2051.1972 | +3;+4;+5 | 51.0 | O89106        | Bis(5'-adenosyl)-triphosphatase                                 |
| AcDGNVDHAATHISNR + Carbamidomethyl (C)                       | 1736.7649 | 1736.7749 | 3        | 68.0 | P54729        | NEDD8 ultimate buster 1                                         |
| KcFSIDNPGYEPEVVAVHPGG<br>DTVAVGGTDGNVR + Carbamidomethyl (C) | 3512.6631 | 3512.7058 | 4        | 37.0 | O88342        | WD repeat-containing protein 1                                  |
| NcPHVVVGTPGR + Carbamidomethyl (C)                           | 1291.6456 | 1291.6451 | 3        | 67.0 | Q8VDW0        | ATP-dependent RNA helicase DDX39A                               |
| FRGYSIPECQK                                                  | 1326.639  | 1326.6523 | 2        | 53.0 | Q9CZU6        | Citrate synthase, mitochondrial                                 |
| RPNKPLFTGLVTQcQK + Carbamidomethyl (C)                       | 1886.0196 | 1886.0094 | 3        | 66.0 | Q8K4Z3        | NAD(P)H-hydrate epimerase                                       |
| ESVcQAALGLIK + Carbamidomethyl (C)                           | 1400.7697 | 1400.7884 | 2        | 57.0 | Q99MR8        | Methylcrotonoyl-CoA carboxylase subunit alpha, mitochondrial    |
| YLAEVAcGDDRK + Carbamidomethyl (C)                           | 1395.6452 | 1395.6508 | +2;+3    | 85.0 | P68254        | 14-3-3 protein theta                                            |
| VTDKLTPIHDHIFccR + 2 Carbamidomethyl (C)                     | 2010.9768 | 2011.0017 | 3        | 63.0 | Q60692        | Proteasome subunit beta type-6                                  |
| KITAFVPNDGcLNFIENDEVL<br>VAGFGR + Carbamidomethyl (C)        | 3123.5335 | 3123.5689 | 3        | 52.0 | P62267        | 40S ribosomal protein S23                                       |
| VRPITNQIECHPYLNQK                                            | 2052.0574 | 2052.0769 | 3        | 74.0 | Q9DCT1        | 1,5-anhydro-D-fructose reductase                                |
| YIETSELGGAR                                                  | 1297.5972 | 1297.6066 | 2        | 62.0 | Q8K1M6        | Dynamin-1-like protein                                          |
| ISEDPPCK                                                     | 887.4059  | 887.4059  | 2        | 70.0 | P11862        | Growth arrest-specific protein 2                                |
| ELGGcSQAGNR + Carbamidomethyl (C)                            | 1147.504  | 1147.511  | 2        | 60.0 | Q80WC7        | Arf-GAP domain and FG repeat-containing protein 2               |
| cVPVvcDSSQESEVK + 2 Carbamidomethyl (C)                      | 1789.7863 | 1789.7943 | 2        | 58.0 | Q99L04        | Dehydrogenase/reductase SDR family member 1                     |
| LQVTASPQSLCGLR                                               | 1471.7817 | 1471.7984 | 2        | 50.0 | P28665,P28666 | Murinoglobulin-1,Murinoglobulin-2                               |
| GEQNMVLFAPNIYVLK                                             | 1834.9651 | 1834.9794 | 4        | 35.0 | P28665,P28666 | Murinoglobulin-1,Murinoglobulin-2                               |
| ScLLHQFTEKK + Carbamidomethyl (C)                            | 1389.7075 | 1389.72   | 3        | 57.0 | Q91V41        | Ras-related protein Rab-14                                      |
| PALACL                                                       | 742.416   | 742.4224  | 2        | 57.0 | Q3UHN9        | Bifunctional heparan sulfate N-deacetylase/N-sulfotransferase 1 |
| cASNVQVDSR + Carbamidomethyl (C)                             | 1134.5088 | 1134.5041 | 2        | 57.0 | Q91W18        | Tudor domain-containing protein 3                               |
| EQIAEQK                                                      | 972.4876  | 972.5216  | 2        | 57.0 | B2RX88        | Centrosome and spindle pole associated protein 1                |
| QQTPPGLcPLAGNSVHADKK + Carbamidomethyl (C)                   | 2117.0688 | 2117.076  | +3;+4    | 83.0 | Q9D854        | Oligoribonuclease, mitochondrial                                |
| NDPSLPEPACvK + Carbamidomethyl (C)                           | 1325.6285 | 1325.6457 | 2        | 54.0 | Q8BP47        | Asparagine--tRNA ligase, cytoplasmic                            |

|                                          |           |           |       |      |                      |                                                                                                                                                                                                   |
|------------------------------------------|-----------|-----------|-------|------|----------------------|---------------------------------------------------------------------------------------------------------------------------------------------------------------------------------------------------|
| TQAIVCQQLDLHLK                           | 1709.9134 | 1709.9325 | 3     | 53.0 | P61222               | ATP-binding cassette sub-family E member 1                                                                                                                                                        |
| NVTDVVNTCHDAGISKK                        | 1799.8836 | 1799.8922 | 3     | 70.0 | Q99LF4               | tRNA-splicing ligase RtcB homolog                                                                                                                                                                 |
| ALENDPDCR                                | 1031.4342 | 1031.4321 | 2     | 63.0 | Q61233,Q99K51        | Plastin-2,Plastin-3                                                                                                                                                                               |
| MIPcDFLIPVQTQHPIRK + Carbamidomethyl (C) | 2192.1598 | 2192.1611 | 4     | 55.0 | P06745               | Glucose-6-phosphate isomerase                                                                                                                                                                     |
| DCPVPLPGDGLLVR                           | 1564.7919 | 1564.7999 | 2     | 98.0 | Q8BGC4               | Zinc-binding alcohol dehydrogenase domain-containing protein 2                                                                                                                                    |
| cQPSAITLNR + Carbamidomethyl (C)         | 1158.5815 | 1158.5912 | 2     | 49.0 | P60670               | Nuclear protein localization protein 4 homolog                                                                                                                                                    |
| EGILNDDIYCPETAVLLASYAV QSK               | 2808.3891 | 2808.4098 | +2;+3 | 66.0 | P26041               | Moesin                                                                                                                                                                                            |
| EANPcPcDIGHK + 2 Carbamidomethyl (C)     | 1464.6126 | 1464.6252 | 2     | 48.0 | Q8R1G2               | Carboxymethylenebutenolidase homolog                                                                                                                                                              |
| LIIAGTScYSR + Carbamidomethyl (C)        | 1239.6281 | 1239.6341 | 2     | 90.0 | P50431               | Serine hydroxymethyltransferase, cytosolic                                                                                                                                                        |
| IcLTDHFKPLWAR + Carbamidomethyl (C)      | 1655.8606 | 1655.8727 | 4     | 47.0 | Q9CR09               | Ubiquitin-fold modifier-conjugating enzyme 1                                                                                                                                                      |
| cSTGENNLETEK + Carbamidomethyl (C)       | 1380.5827 | 1380.5906 | 2     | 47.0 | Q09324               | Beta-1,3-galactosyl-O-glycosyl-glycoprotein beta-1,6-N-acetylglucosaminyltransferase                                                                                                              |
| KcALTGQSKPCR + Carbamidomethyl (C)       | 1415.7013 | 1415.7107 | 3     | 46.0 | Q68EF0               | Rab-3A-interacting protein                                                                                                                                                                        |
| cQAAEPQIITGSHDTTIR + Carbamidomethyl (C) | 1996.9636 | 1996.9847 | 3     | 46.0 | Q922V4               | Pleiotropic regulator 1                                                                                                                                                                           |
| GNHEcASINR + Carbamidomethyl (C)         | 1156.5043 | 1156.5052 | +2;+3 | 49.0 | P62141,P62137,P63087 | Serine/threonine-protein phosphatase PP1-beta catalytic subunit,Serine/threonine-protein phosphatase PP1-alpha catalytic subunit,Serine/threonine-protein phosphatase PP1-gamma catalytic subunit |
| SGANVLlcGPNCGCK + Carbamidomethyl (C)    | 1513.7017 | 1513.7067 | 2     | 74.0 | P55096               | ATP-binding cassette sub-family D member 3                                                                                                                                                        |
| AVAHTDcTFIR + Carbamidomethyl (C)        | 1426.6776 | 1426.6778 | 3     | 58.0 | P62196               | 26S protease regulatory subunit 8                                                                                                                                                                 |

|                                            |           |           |   |      |               |                                                                                                           |
|--------------------------------------------|-----------|-----------|---|------|---------------|-----------------------------------------------------------------------------------------------------------|
| TSDFNTFLAQEGCTR                            | 1688.7464 | 1688.762  | 2 | 70.0 | Q9D1P4        | Cysteine and histidine-rich domain-containing protein 1                                                   |
| cIPLWR + Carbamidomethyl (C)               | 843.4425  | 843.4513  | 2 | 44.0 | Q80U72,Q80VQ1 | Protein scribble homolog,Leucine-rich repeat-containing protein 1                                         |
| cLPLWR + Carbamidomethyl (C)               | 843.4425  | 843.4513  | 2 | 44.0 | O08762        | Neurotrypsin                                                                                              |
| TQVDTLSNDIDQLK                             | 1588.7944 | 1588.7393 | 3 | 42.0 | O54692        | Centromere/kinetochore protein zw10 homolog                                                               |
| ESDIEQL                                    | 832.3814  | 832.3908  | 2 | 42.0 | P70335        | Rho-associated protein kinase 1                                                                           |
| TScLcPNFINTGFIK + 2 Carbamidomethyl (C)    | 1838.8695 | 1838.9002 | 2 | 42.0 | Q9EQ06        | Estradiol 17-beta-dehydrogenase 11                                                                        |
| TPEQcPSVVSLLESYNPHVR + Carbamidomethyl (C) | 2398.1587 | 2398.163  | 3 | 41.0 | Q3TXS7        | 26S proteasome non-ATPase regulatory subunit 1                                                            |
| KcFALR + Carbamidomethyl (C)               | 793.4269  | 793.429   | 2 | 43.0 | Q9Z2V4,Q8BH04 | Phosphoenolpyruvate carboxykinase, cytosolic [GTP],Phosphoenolpyruvate carboxykinase [GTP], mitochondrial |
| VQTAKHILEELK                               | 1407.8085 | 1407.7535 | 2 | 41.0 | Q3V3E1        | Ubiquitin-associated and SH3 domain-containing protein A                                                  |
| HKTGPNLHGLFGR                              | 1432.7688 | 1432.7817 | 4 | 41.0 | P62897        | Cytochrome c, somatic                                                                                     |
| LSWTVK                                     | 732.417   | 732.427   | 2 | 41.0 | A2ASS6        | Titin                                                                                                     |
| LASDTVK                                    | 732.4018  | 732.427   | 2 | 41.0 | Q8C7R7        | DNA-binding protein RFX6                                                                                  |
| LlcTVK + Carbamidomethyl (C)               | 732.4204  | 732.427   | 2 | 41.0 | Q91X88        | Protein O-linked-mannose beta-1,2-N-acetylglucosaminyltransferase 1                                       |
| LcISIK + Carbamidomethyl (C)               | 732.4204  | 732.427   | 2 | 41.0 | P11103        | Poly [ADP-ribose] polymerase 1                                                                            |
| ICVATVK                                    | 732.4204  | 732.427   | 2 | 41.0 | P59178        | Lethal(3)malignant brain tumor-like protein 2                                                             |
| ICGLLSK                                    | 732.4204  | 732.427   | 2 | 41.0 | Q9JKE2        | Triggering receptor expressed on myeloid cells 1                                                          |
| IcAIPR + Carbamidomethyl (C)               | 728.4003  | 728.4005  | 2 | 43.0 | O54749        | Cytochrome P450 2J5                                                                                       |
| LcALPR + Carbamidomethyl (C)               | 728.4003  | 728.4005  | 2 | 43.0 | Q81110        | ATP synthase mitochondrial F1 complex assembly factor 1                                                   |
| NIDPKPCTPR                                 | 1139.5757 | 1139.5813 | 2 | 40.0 | Q9JII5        | DAZ-associated protein 1                                                                                  |
| SDLEAQVESLRQELLC                           | 1831.8985 | 1831.8623 | 4 | 39.0 | Q61897        | Keratin, type I cuticular Ha3-II                                                                          |

|                                                             |           |           |       |       |               |                                                                          |
|-------------------------------------------------------------|-----------|-----------|-------|-------|---------------|--------------------------------------------------------------------------|
| LQAQQDAVNIVCHSK                                             | 1652.8304 | 1652.8338 | 3     | 75.0  | O35226        | 26S proteasome non-ATPase regulatory subunit 4                           |
| CAYVYK                                                      | 745.3469  | 745.3354  | 2     | 49.0  | O55142        | 60S ribosomal protein L35a                                               |
| YGLNMcR + Carbamidomethyl (C)                               | 912.3946  | 912.4026  | 2     | 38.0  | P62274        | 40S ribosomal protein S29                                                |
| cNQPLAR + Carbamidomethyl (C)                               | 857.4178  | 857.4208  | 2     | 37.0  | Q62523        | Zyxin                                                                    |
| CGLIFR                                                      | 707.3789  | 707.3863  | 2     | 37.0  | Q8CD54        | Piezo-type mechanosensitive ion channel component 2                      |
| cIIFR + Carbamidomethyl (C)                                 | 707.3789  | 707.3863  | 2     | 37.0  | Q05860        | Formin-1                                                                 |
| VCFILN                                                      | 707.3676  | 707.3863  | 2     | 37.0  | Q8CHG5        | Apoptosis-resistant E3 ubiquitin protein ligase 1                        |
| cILFR + Carbamidomethyl (C)                                 | 707.3789  | 707.3863  | 2     | 37.0  | Q7TMA4,Q9D4G9 | Free fatty acid receptor 4,RecQ-mediated genome instability protein 1    |
| cLLFR + Carbamidomethyl (C)                                 | 707.3789  | 707.3863  | 2     | 37.0  | P61028        | Ras-related protein Rab-8B                                               |
| GTDEcAIESIAVAAIPIK + Carbamidomethyl (C)                    | 1954.0081 | 1954.0628 | 2     | 36.0  | P97821        | Dipeptidyl peptidase 1                                                   |
| cMPTFQFYKK + Carbamidomethyl (C)                            | 1348.6308 | 1348.6381 | +2;+3 | 49.0  | P10639        | Thioredoxin                                                              |
| ADSDPHGPHTCGHVLNVIIGSN<br>SLALAEAQR + Carbamidomethyl (C)   | 3235.5793 | 3235.5949 | +3;+4 | 74.0  | Q8QZY2        | Glycerate kinase                                                         |
| NKHTLcR + Carbamidomethyl (C)                               | 1028.5185 | 1028.5231 | 3     | 35.0  | Q9D823        | 60S ribosomal protein L37                                                |
| YEASFPFLSLcGR + Carbamidomethyl (C)                         | 1545.7286 | 1545.7665 | 2     | 34.0  | Q8VE95        | UPF0598 protein C8orf82 homolog                                          |
| AGLSSGFVGCVR                                                | 1151.5757 | 1151.5811 | 2     | 33.0  | Q05793        | Basement membrane-specific heparan sulfate proteoglycan core protein     |
| LAPELSACSS                                                  | 976.4535  | 976.4552  | 2     | 32.0  | Q8BHZ4        | Zinc finger protein 592                                                  |
| LcHGHPFLK + Carbamidomethyl (C)                             | 1107.5648 | 1107.5729 | 3     | 31.0  | Q9DBK0        | Acyl-coenzyme A thioesterase 12                                          |
| cPAsicLNGGScR + 3 Carbamidomethyl (C)                       | 1518.6378 | 1518.6289 | 2     | 31.0  | Q9CZT5        | Vasorin                                                                  |
| DAHSQGEVVSclEK + Carbamidomethyl (C)                        | 1557.7093 | 1557.7189 | 2     | 30.0  | Q61543        | Golgi apparatus protein 1                                                |
| LKTEGSDLcDR + Carbamidomethyl (C)                           | 1292.6031 | 1292.6034 | 2     | 34.0  | Q91YQ5        | Dolichyl-diphosphooligosaccharide--protein glycosyltransferase subunit 1 |
| AETFFHSDIcTLPEK + Carbamidomethyl (C)                       | 1894.8771 | 1894.8865 | +2;+3 | 80.0  | P07724        | Serum albumin                                                            |
| AELAKYMcENQATISSK + Carbamidomethyl (C)                     | 1942.9128 | 1942.9186 | 3     | 93.0  | P07724        | Serum albumin                                                            |
| TNcDLYEKLGEGFQNAIL + Carbamidomethyl (C)                    | 2247.0518 | 2247.0372 | 2     | 45.0  | P07724        | Serum albumin                                                            |
| EccHGDLLcEADDRAELAK + 3 Carbamidomethyl (C)                 | 2260.9511 | 2260.9529 | 3     | 65.0  | P07724        | Serum albumin                                                            |
| AHcLSEVEHDTMPADLPAIAA<br>DFVEDQEVcK + 2 Carbamidomethyl (C) | 3496.5585 | 3564.6181 | +3;+4 | 129.0 | P07724        | Serum albumin                                                            |

|                                                                 |           |           |       |       |        |                                                                         |
|-----------------------------------------------------------------|-----------|-----------|-------|-------|--------|-------------------------------------------------------------------------|
| KAHCLSEVEHDTMPADLPAIA<br>ADFVEDQEVcK + 2<br>Carbamidomethyl (C) | 3624.6535 | 3692.6975 | 4     | 110.0 | P07724 | Serum albumin                                                           |
| EWAcPGSGR +<br>Carbamidomethyl (C)                              | 1018.4291 | 1018.4266 | 2     | 63.0  | A2ARV4 | Low-density lipoprotein receptor-related<br>protein 2                   |
| FRcDNSR +<br>Carbamidomethyl (C)                                | 1021.44   | 953.4146  | 2     | 34.0  | A2ARV4 | Low-density lipoprotein receptor-related<br>protein 2                   |
| SNEFQcVSPHR +<br>Carbamidomethyl (C)                            | 1359.599  | 1359.6008 | 3     | 69.0  | A2ARV4 | Low-density lipoprotein receptor-related<br>protein 2                   |
| SDGSDESdLcPHR +<br>Carbamidomethyl (C)                          | 1473.579  | 1473.5812 | +2;+3 | 105.0 | A2ARV4 | Low-density lipoprotein receptor-related<br>protein 2                   |
| cAcDPEYTLSDGR + 2<br>Carbamidomethyl (C)                        | 1671.6505 | 1739.6861 | 2     | 97.0  | A2ARV4 | Low-density lipoprotein receptor-related<br>protein 2                   |
| AIVLDPcRGYMYWTDWGTNA<br>K + Carbamidomethyl (C)                 | 2516.1617 | 2516.1767 | 3     | 65.0  | A2ARV4 | Low-density lipoprotein receptor-related<br>protein 2                   |
| WKcDGIDDcGDNSDEEScVPR<br>+ 3 Carbamidomethyl (C)                | 2649.0054 | 2649.0137 | 3     | 83.0  | A2ARV4 | Low-density lipoprotein receptor-related<br>protein 2                   |
| AIQENANALAR                                                     | 1169.6152 | 1169.6179 | 2     | 85.0  | Q91Y97 | Fructose-bisphosphate aldolase B                                        |
| RAMANcQAAQGQYVHTGSSG<br>+ Carbamidomethyl (C)                   | 2092.9167 | 2092.9243 | 3     | 81.0  | Q91Y97 | Fructose-bisphosphate aldolase B                                        |
| AMANcQAAQGQYVHTGSSGA<br>AA + Carbamidomethyl (C)                | 2149.9269 | 2149.9442 | +2;+3 | 61.0  | Q91Y97 | Fructose-bisphosphate aldolase B                                        |
| TVKWcAVSEHENTK +<br>Carbamidomethyl (C)                         | 1687.7988 | 1687.8039 | 4     | 76.0  | Q92111 | Serotransferrin                                                         |
| TSATWFALSRIAGLcNR +<br>Carbamidomethyl (C)                      | 1922.9785 | 1922.9853 | 3     | 59.0  | Q8VDN2 | Sodium/potassium-transporting ATPase<br>subunit alpha-1                 |
| ATHPLPKDcPVSSYNEWDPLE<br>EVIVGR + Carbamidomethyl<br>(C)        | 3107.5022 | 3107.5666 | +3;+4 | 81.0  | Q9D964 | Glycine amidinotransferase,<br>mitochondrial                            |
| TANVFEQIcGLQQGDHLALILP<br>R + Carbamidomethyl (C)               | 2592.3482 | 2592.3642 | 3     | 108.0 | Q91VA0 | Acyl-coenzyme A synthetase ACSM1,<br>mitochondrial                      |
| TSNLRFPtleHcTTGGESLLPEE<br>YEQWK + Carbamidomethyl<br>(C)       | 3321.5612 | 3321.5953 | +3;+4 | 97.0  | Q91VA0 | Acyl-coenzyme A synthetase ACSM1,<br>mitochondrial                      |
| IKPTRPLGLFMeyENSPESTSEV<br>EcGDFYNSGDR +<br>Carbamidomethyl (C) | 3923.7618 | 3923.7997 | +3;+4 | 119.0 | Q91VA0 | Acyl-coenzyme A synthetase ACSM1,<br>mitochondrial                      |
| VVLETETLDEAIK                                                   | 1458.7817 | 1458.7893 | 2     | 68.0  | Q9EQ20 | Methylmalonate-semialdehyde<br>dehydrogenase [acylating], mitochondrial |

|                                                               |           |           |       |       |               |                                                                      |
|---------------------------------------------------------------|-----------|-----------|-------|-------|---------------|----------------------------------------------------------------------|
| VPQSTKAEMDAAVEScK + Carbamidomethyl (C)                       | 1849.855  | 1849.8612 | 3     | 72.0  | Q9EQ20        | Methylmalonate-semialdehyde dehydrogenase [acylating], mitochondrial |
| GLQVVEHAcSVTSLMLGETMPSITK + Carbamidomethyl (C)               | 2687.3333 | 2687.3269 | 3     | 85.0  | Q9EQ20        | Methylmalonate-semialdehyde dehydrogenase [acylating], mitochondrial |
| AGKPVicATQMLESMIKKPRPTR + Carbamidomethyl (C)                 | 2611.4124 | 2611.4313 | 4     | 66.0  | P52480        | Pyruvate kinase PKM                                                  |
| SAAVAKQALAHGLK                                                | 1363.7935 | 1363.7964 | 3     | 75.0  | Q99K10        | Aconitate hydratase, mitochondrial                                   |
| IGVVVGNCyGFVGNR + Carbamidomethyl (C)                         | 1609.8035 | 1609.8113 | 2     | 111.0 | Q9DBM2        | Peroxisomal bifunctional enzyme                                      |
| YSPIADMLcEAGRFGQK + Carbamidomethyl (C)                       | 1941.9077 | 1941.8651 | 2     | 55.0  | Q9DBM2        | Peroxisomal bifunctional enzyme                                      |
| VNQIGSVTESLQAcKLAQSNWGVMVSHR + Carbamidomethyl (C)            | 3155.5604 | 3155.5993 | 3     | 146.0 | P17182        | Alpha-enolase                                                        |
| QATLGAGLPiSTPcTTVNKVCASGMK + 2 Carbamidomethyl (C)            | 2661.3288 | 2661.348  | 3     | 121.0 | Q8QZT1        | Acetyl-CoA acetyltransferase, mitochondrial                          |
| RQVEIAQR                                                      | 998.5621  | 998.564   | 2     | 44.0  | P16460        | Argininosuccinate synthase                                           |
| cNQIFINNEWHDAVSR + Carbamidomethyl (C)                        | 2001.9115 | 2001.925  | 3     | 46.0  | P47738        | Aldehyde dehydrogenase, mitochondrial                                |
| TFPTVNPSTGEVcQVAEGNKE DVDK + Carbamidomethyl (C)              | 2833.344  | 2833.3701 | 3     | 121.0 | P47738        | Aldehyde dehydrogenase, mitochondrial                                |
| QGGFLPGGSLHSAMTPHGP DADcFEK + Carbamidomethyl (C)             | 2769.2276 | 2769.2515 | +3;+4 | 43.0  | O09173        | Homogentisate 1,2-dioxygenase                                        |
| cELLYEGPPDDEAAMGIK + Carbamidomethyl (C)                      | 2006.8965 | 2006.9048 | 2     | 109.0 | P58252        | Elongation factor 2                                                  |
| YRcELLYEGPPDDEAAMGIK + Carbamidomethyl (C)                    | 2326.0609 | 2326.0632 | 3     | 57.0  | P58252        | Elongation factor 2                                                  |
| VNVEVSAEDLLTCCGIQcGDGcNGGYPGSAWSFWTKK + 2 Carbamidomethyl (C) | 4143.8111 | 4143.7906 | 3     | 83.0  | P10605        | Cathepsin B                                                          |
| KDGSASGTTLLEALDcILPPTRP TD + Carbamidomethyl (C)              | 2627.3112 | 2627.3278 | 3     | 87.0  | P10126        | Elongation factor 1-alpha 1                                          |
| GIicGLTQFTNK + Carbamidomethyl (C)                            | 1350.6966 | 1350.704  | 2     | 87.0  | Q64516        | Glycerol kinase                                                      |
| EcLAcR + 2 Carbamidomethyl (C)                                | 875.3629  | 875.3667  | 2     | 36.0  | Q99LB7        | Sarcosine dehydrogenase, mitochondrial                               |
| HWHADLRPDDSPLEAGLAFTcK + Carbamidomethyl (C)                  | 2535.1965 | 2535.208  | 4     | 54.0  | Q99LB7        | Sarcosine dehydrogenase, mitochondrial                               |
| TAAVALQEEREDAVALcSMAK + Carbamidomethyl (C)                   | 2262.0984 | 2262.1075 | 3     | 76.0  | Q9D7B6        | Isobutyryl-CoA dehydrogenase, mitochondrial                          |
| FASyLcTEPGSGSDAASLLTSK + Carbamidomethyl (C)                  | 2332.0893 | 2332.1082 | 2     | 93.0  | Q9D7B6        | Isobutyryl-CoA dehydrogenase, mitochondrial                          |
| LVVDNGSGMcK + Carbamidomethyl (C)                             | 1178.5424 | 1178.5456 | 2     | 92.0  | P60710,Q8BFZ3 | Actin, cytoplasmic 1,Beta-actin-like protein 2                       |

|                                                            |           |           |       |       |                                                              |                                                                                                                                                                  |
|------------------------------------------------------------|-----------|-----------|-------|-------|--------------------------------------------------------------|------------------------------------------------------------------------------------------------------------------------------------------------------------------|
| TVGIVGNQPNVASGcLDINSSV<br>K + Carbamidomethyl (C)          | 2328.1744 | 2328.209  | +2;+3 | 118.0 | Q99MN9                                                       | Propionyl-CoA carboxylase beta chain,<br>mitochondrial                                                                                                           |
| HKQEDIPISGWAVEcR +<br>Carbamidomethyl (C)                  | 1923.9261 | 1923.934  | 3     | 95.0  | Q91ZA3                                                       | Propionyl-CoA carboxylase alpha chain,<br>mitochondrial                                                                                                          |
| TSDETLLEDAIEVcK +<br>Carbamidomethyl (C)                   | 1721.8029 | 1721.8095 | 2     | 86.0  | Q9JKB1                                                       | Ubiquitin carboxyl-terminal hydrolase<br>isozyme L3                                                                                                              |
| NKPcITYGLR +<br>Carbamidomethyl (C)                        | 1220.6336 | 1220.6396 | 3     | 40.0  | Q9D1A2                                                       | Cytosolic non-specific dipeptidase                                                                                                                               |
| MTVNESEQLVScSMDDTVR +<br>Carbamidomethyl (C)               | 2199.9446 | 2199.9688 | 2     | 173.0 | O88342                                                       | WD repeat-containing protein 1                                                                                                                                   |
| VNQIGSVTESIQAcKLAQSNG<br>WGVMVSHR +<br>Carbamidomethyl (C) | 3155.5604 | 3155.5993 | 3     | 146.0 | P21550                                                       | Beta-enolase                                                                                                                                                     |
| TLTELNKCCGLcICPcNR + 3<br>Carbamidomethyl (C)              | 2290.0037 | 2289.9853 | 3     | 39.0  | O09044                                                       | Synaptosomal-associated protein 23                                                                                                                               |
| NLSTFAVDGKDcK +<br>Carbamidomethyl (C)                     | 1453.6871 | 1453.6933 | +2;+3 | 85.0  | Q9D172                                                       | ES1 protein homolog, mitochondrial                                                                                                                               |
| SHSNQLVTDcISAMNPDTVLR<br>+ Carbamidomethyl (C)             | 2357.1104 | 2357.1217 | 3     | 101.0 | Q9Z0S1                                                       | 3'(2'),5'-bisphosphate nucleotidase 1                                                                                                                            |
| KFSGDVVLAAR                                                | 1161.6506 | 1161.6583 | 2     | 46.0  | P48758                                                       | Carbonyl reductase [NADPH] 1                                                                                                                                     |
| AYHEQLTVAEITNacFEPANQ<br>MVK + Carbamidomethyl (C)         | 2763.2996 | 2763.313  | 3     | 129.0 | P68373                                                       | Tubulin alpha-1C chain                                                                                                                                           |
| MAATFIGN                                                   | 823.3898  | 823.4056  | 2     | 36.0  | Q9D6F9                                                       | Tubulin beta-4A chain                                                                                                                                            |
| NMMAAcDPR +<br>Carbamidomethyl (C)                         | 1064.4201 | 1064.4233 | 2     | 59.0  | Q9D6F9,Q9ERD7,<br>Q9CWF2,P99024,<br>Q7TMM9,P68372,<br>Q922F4 | Tubulin beta-4A chain,Tubulin beta-3<br>chain,Tubulin beta-2B chain,Tubulin beta-<br>5 chain,Tubulin beta-2A chain,Tubulin<br>beta-4B chain,Tubulin beta-6 chain |
| GLGDcLVK +<br>Carbamidomethyl (C)                          | 860.4426  | 860.4449  | 2     | 45.0  | P51881                                                       | ADP/ATP translocase 2                                                                                                                                            |
| GTDIMYTGTLdCWR +<br>Carbamidomethyl (C)                    | 1687.7334 | 1687.7405 | 2     | 79.0  | P51881                                                       | ADP/ATP translocase 2                                                                                                                                            |
| GTDIMYTGTLdCWRK +<br>Carbamidomethyl (C)                   | 1815.8284 | 1815.8334 | +2;+3 | 61.0  | P51881                                                       | ADP/ATP translocase 2                                                                                                                                            |
| KGTDIMYTGTLdCWR +<br>Carbamidomethyl (C)                   | 1815.8284 | 1815.8458 | 2     | 63.0  | P51881                                                       | ADP/ATP translocase 2                                                                                                                                            |
| LVQAFQYTDEHGEVcPAGWK<br>PG + Carbamidomethyl (C)           | 2488.1482 | 2488.1517 | 3     | 36.0  | Q61171                                                       | Peroxisredoxin-2                                                                                                                                                 |
| KTFDLYANVRPcVSIIEGYK +<br>Carbamidomethyl (C)              | 2259.1358 | 2259.1369 | 3     | 53.0  | Q9D6R2                                                       | Isocitrate dehydrogenase [NAD] subunit<br>alpha, mitochondrial                                                                                                   |



|                                                                  |           |           |       |       |               |                                                               |
|------------------------------------------------------------------|-----------|-----------|-------|-------|---------------|---------------------------------------------------------------|
| EVGEVLCtDPLVSK + Carbamidomethyl (C)                             | 1544.7756 | 1544.7826 | 2     | 52.0  | Q8BWF0        | Succinate-semialdehyde dehydrogenase, mitochondrial           |
| DLEIERPMPGTHVTTLQcPALLVVGDNPAVDVAVVEcNSK + 2 Carbamidomethyl (C) | 4399.1498 | 4331.1517 | 4     | 88.0  | Q62433        | Protein NDRG1                                                 |
| MFDRHSSLAGcQIINyR + Carbamidomethyl (C)                          | 2066.9778 | 2066.9916 | 3     | 67.0  | Q68FD5        | Clathrin heavy chain 1                                        |
| LTAIPVSAFcDSK + Carbamidomethyl (C)                              | 1407.7068 | 1407.7138 | 2     | 83.0  | Q71RI9        | Kynurenine--oxoglutarate transaminase 3                       |
| FFESYHEVPDGTQcHR + Carbamidomethyl (C)                           | 2007.8534 | 2007.8624 | 4     | 53.0  | Q9D8B4        | NADH dehydrogenase [ubiquinone] 1 alpha subcomplex subunit 11 |
| VcALMScAK + 2 Carbamidomethyl (C)                                | 1106.4922 | 1106.4965 | 2     | 65.0  | P45376        | Aldose reductase                                              |
| YLAAAFPSAcGK + Carbamidomethyl (C)                               | 1254.6067 | 1254.6119 | 2     | 94.0  | Q9Z2V4        | Phosphoenolpyruvate carboxykinase, cytosolic [GTP]            |
| VEcVGDDIAWMK + Carbamidomethyl (C)                               | 1421.6319 | 1421.6381 | 2     | 97.0  | Q9Z2V4        | Phosphoenolpyruvate carboxykinase, cytosolic [GTP]            |
| cYScGEFGHIQK + 2 Carbamidomethyl (C)                             | 1552.6439 | 1552.6494 | 3     | 71.0  | P53996        | Cellular nucleic acid-binding protein                         |
| SNPDKVPASK                                                       | 1138.5982 | 1138.6008 | 2     | 33.0  | P45952        | Medium-chain specific acyl-CoA dehydrogenase, mitochondrial   |
| AVLFcLSEDKK + Carbamidomethyl (C)                                | 1308.6748 | 1308.6816 | +2;+3 | 69.0  | P18760        | Cofilin-1                                                     |
| VYEEDAVPGLTPcRFTGSEIR + Carbamidomethyl (C)                      | 2395.1478 | 2395.159  | 3     | 46.0  | Q9CZ13        | Cytochrome b-c1 complex subunit 1, mitochondrial              |
| NLDSTTVAIHDEEIcK + Carbamidomethyl (C)                           | 2006.9255 | 2006.9426 | 2     | 72.0  | P97314        | Cysteine and glycine-rich protein 2                           |
| TMDWFGYYGGPcR + Carbamidomethyl (C)                              | 1608.649  | 1608.6481 | 2     | 43.0  | Q9DCU9        | 4-hydroxy-2-oxoglutarate aldolase, mitochondrial              |
| VAGTQPITcK + Carbamidomethyl (C)                                 | 1073.5539 | 1073.5567 | 2     | 69.0  | Q6PDN3        | Myosin light chain kinase, smooth muscle                      |
| QAQVNLTVVDKPPAGTPcASDIR + Carbamidomethyl (C)                    | 2648.3228 | 2648.3362 | 3     | 102.0 | Q6PDN3        | Myosin light chain kinase, smooth muscle                      |
| DGTAHPAMcLQNLDMLEAGLPDMK + Carbamidomethyl (C)                   | 2741.2281 | 2741.2293 | 3     | 128.0 | Q91WG0        | Acylcarnitine hydrolase                                       |
| SGGASEPLPHQPSLETQLYcGQAEGGSEGPSTSGTLK + Carbamidomethyl (C)      | 3826.7956 | 3826.8301 | 3     | 162.0 | P04919        | Band 3 anion transport protein                                |
| KSDIYVcMISYAHNVAAQgK + Carbamidomethyl (C)                       | 2254.0874 | 2254.0953 | 4     | 81.0  | P50396        | Rab GDP dissociation inhibitor alpha                          |
| VDEFPLcGHMVSDEYQLSSEALEAAR + Carbamidomethyl (C)                 | 3081.3695 | 3081.3844 | 3     | 104.0 | Q6ZwV3,P86048 | 60S ribosomal protein L10,60S ribosomal protein L10-like      |

|                                                          |           |           |       |       |               |                                                               |
|----------------------------------------------------------|-----------|-----------|-------|-------|---------------|---------------------------------------------------------------|
| TEVNQIHEDcK + Carbamidomethyl (C)                        | 1371.6089 | 1371.6077 | +2;+3 | 51.0  | Q3UEG6        | Alanine--glyoxylate aminotransferase 2, mitochondrial         |
| TEVNQIHEDcKDMGLLVGR + Carbamidomethyl (C)                | 2213.0569 | 2213.0787 | 3     | 83.0  | Q3UEG6        | Alanine--glyoxylate aminotransferase 2, mitochondrial         |
| RSIQFVDWcPTGFK + Carbamidomethyl (C)                     | 1739.8454 | 1739.8497 | 3     | 33.0  | P68368,P05213 | Tubulin alpha-4A chain,Tubulin alpha-1B chain                 |
| TTTLAFKFLHGIVIVAADSR                                     | 2046.1262 | 2046.1313 | 3     | 111.0 | O55234        | Proteasome subunit beta type-5                                |
| cGDLEELKNVTNNLK + Carbamidomethyl (C)                    | 1874.9044 | 1874.9099 | 3     | 111.0 | Q6IRU2        | Tropomyosin alpha-4 chain                                     |
| HLIIGVSSDRGLcGAIHSSVAK + Carbamidomethyl (C)             | 2276.2059 | 2276.2197 | +3;+4 | 42.0  | Q91VR2        | ATP synthase subunit gamma, mitochondrial                     |
| MGLPIcLVVAVNRNDIHR + Carbamidomethyl (C)                 | 2189.1925 | 2189.1974 | 4     | 71.0  | Q80W22        | Threonine synthase-like 2                                     |
| YKVIEDYNGAccPLNR + 2 Carbamidomethyl (C)                 | 1970.8978 | 1970.9089 | 3     | 70.0  | Q9CPV7        | Palmitoyltransferase ZDHHC6                                   |
| SFDDSGSGYcR + Carbamidomethyl (C)                        | 1249.467  | 1249.4703 | 2     | 37.0  | P19096        | Fatty acid synthase                                           |
| FVFTPHMEAEcLSESTALQK + Carbamidomethyl (C)               | 2324.0817 | 2324.0995 | 3     | 100.0 | P19096        | Fatty acid synthase                                           |
| VFANAPDSAcVIGLR + Carbamidomethyl (C)                    | 1588.8032 | 1588.8135 | 2     | 107.0 | P12382        | ATP-dependent 6-phosphofructokinase, liver type               |
| LILTLTHGSVVSTR                                           | 1495.8722 | 1495.8777 | 3     | 77.0  | P11404        | Fatty acid-binding protein, heart                             |
| EKcGVFPScVPDPAQK + 3 Carbamidomethyl (C)                 | 2113.9271 | 2113.9264 | 3     | 58.0  | Q8QZY6        | Tetraspanin-14                                                |
| IIGTLQNSAEFADAFHcRK + Carbamidomethyl (C)                | 2177.0688 | 2177.0821 | 3     | 93.0  | Q61391        | Neprilysin                                                    |
| DMHGDSEYNIMFGPDicGPGTKK + Carbamidomethyl (C)            | 2568.1083 | 2568.0969 | 3     | 53.0  | P14211        | Calreticulin                                                  |
| GVNcIDYSSGGDKPYLISGADDR + Carbamidomethyl (C)            | 2534.1384 | 2534.1466 | 3     | 89.0  | O55029        | Coatomer subunit beta'                                        |
| LKPPFPADVGvFGcPTTVANVETVAVSPTicR + 2 Carbamidomethyl (C) | 3466.7629 | 3466.8403 | 3     | 88.0  | Q91YT0        | NADH dehydrogenase [ubiquinone] flavoprotein 1, mitochondrial |
| IQLAMVcYSPDFEK + Carbamidomethyl (C)                     | 1699.795  | 1699.8036 | 2     | 88.0  | P15626        | Glutathione S-transferase Mu 2                                |
| AVLITGcDTGFGK + Carbamidomethyl (C)                      | 1337.665  | 1337.6732 | 2     | 67.0  | P51661        | Corticosteroid 11-beta-dehydrogenase isozyme 2                |
| AVLITGcDTGFGKETAK + Carbamidomethyl (C)                  | 1766.8873 | 1766.8933 | 3     | 98.0  | P51661        | Corticosteroid 11-beta-dehydrogenase isozyme 2                |
| IVHAGcPEVAGPTLLAK + Carbamidomethyl (C)                  | 1731.9342 | 1731.9434 | 3     | 87.0  | Q9CXA2        | Trans-L-3-hydroxyproline dehydratase                          |
| YlcGEAPDYDR + Carbamidomethyl (C)                        | 1357.5609 | 1357.5718 | 2     | 87.0  | P48774        | Glutathione S-transferase Mu 5                                |
| DGGQYALVAACAAAGQGGHAMIVEAYPK + Carbamidomethyl (C)       | 2704.2737 | 2704.3022 | 3     | 87.0  | Q99JY0        | Trifunctional enzyme subunit beta, mitochondrial              |
| AVEEYScEFGSMK + Carbamidomethyl (C)                      | 1535.6272 | 1535.639  | 2     | 87.0  | Q8VEM8        | Phosphate carrier protein, mitochondrial                      |

|                                                           |           |           |       |      |               |                                                                                                                             |
|-----------------------------------------------------------|-----------|-----------|-------|------|---------------|-----------------------------------------------------------------------------------------------------------------------------|
| I IHEDGYSEEEcRQYR + Carbamidomethyl (C)                   | 2082.9065 | 2082.9151 | 3     | 64.0 | P08752        | Guanine nucleotide-binding protein G(i) subunit alpha-2                                                                     |
| TLESIMAcclSEEAk + 2 Carbamidomethyl (C)                   | 1740.7732 | 1740.7832 | +2;+3 | 72.0 | P21279        | Guanine nucleotide-binding protein G(q) subunit alpha                                                                       |
| LEPSGPISTINPcPPcK + 2 Carbamidomethyl (C)                 | 1933.9278 | 1933.9398 | 2     | 84.0 | P01867        | Ig gamma-2B chain C region                                                                                                  |
| VVNSETPVVVDFAHQWcGpK + 2 Carbamidomethyl (C)              | 2496.1566 | 2496.1681 | 3     | 83.0 | P97493        | Thioredoxin, mitochondrial                                                                                                  |
| LLRPLHcGcSccPcGLQE + 5 Carbamidomethyl (C)                | 2215.9418 | 2215.9514 | 3     | 48.0 | Q9JIZ9        | Phospholipid scramblase 3                                                                                                   |
| TAAGTLFVHLcSESSTVK + Carbamidomethyl (C)                  | 1906.9459 | 1906.9625 | 3     | 82.0 | Q91YY4        | ATP synthase mitochondrial F1 complex assembly factor 2                                                                     |
| LSSGEHIAAFcLTEPASGSDAASIQTR + Carbamidomethyl (C)         | 2775.3134 | 2775.3194 | 3     | 81.0 | Q8JZN5        | Acyl-CoA dehydrogenase family member 9, mitochondrial                                                                       |
| DQDcDKFNQcGTcTEFK + 3 Carbamidomethyl (C)                 | 2287.8821 | 2287.9027 | 3     | 81.0 | Q9WUU7        | Cathepsin Z                                                                                                                 |
| cKAVITFNQGLR + Carbamidomethyl (C)                        | 1405.75   | 1405.7607 | 2     | 40.0 | Q99NB1        | Acetyl-coenzyme A synthetase 2-like, mitochondrial                                                                          |
| FQRYPDcK + Carbamidomethyl (C)                            | 1112.5073 | 1112.5088 | 2     | 33.0 | Q9DBE0        | Cysteine sulfinic acid decarboxylase                                                                                        |
| FYDVALDTGDKVVQcGR + Carbamidomethyl (C)                   | 1941.9255 | 1941.9278 | +2;+3 | 90.0 | Q9DBE0        | Cysteine sulfinic acid decarboxylase                                                                                        |
| HEEFEEGcK + Carbamidomethyl (C)                           | 1163.4553 | 1163.4552 | 2     | 79.0 | Q9CPV4        | Glyoxalase domain-containing protein 4                                                                                      |
| GcGGVITLNRPK + Carbamidomethyl (C)                        | 1270.6816 | 1270.685  | +2;+3 | 62.0 | Q8QZS1        | 3-hydroxyisobutyryl-CoA hydrolase, mitochondrial                                                                            |
| RGcGGVITLNRPK + Carbamidomethyl (C)                       | 1426.7827 | 1426.787  | 3     | 51.0 | Q8QZS1        | 3-hydroxyisobutyryl-CoA hydrolase, mitochondrial                                                                            |
| cSLPEVGTK + Carbamidomethyl (C)                           | 989.4852  | 989.4919  | 2     | 58.0 | Q91WK5        | Glycine cleavage system H protein, mitochondrial                                                                            |
| LVTSPcclVTSTYGWTANMER + 2 Carbamidomethyl (C)             | 2445.1127 | 2445.1136 | 2     | 76.0 | P07901        | Heat shock protein HSP 90-alpha                                                                                             |
| EGATLVcGGNQVPRPGFFQP TVFTDVEDHMYIAK + Carbamidomethyl (C) | 3926.8761 | 3926.8972 | 4     | 54.0 | Q8R0Y6        | Cytosolic 10-formyltetrahydrofolate dehydrogenase                                                                           |
| GGFRGcTVWLTGLSGAGK + Carbamidomethyl (C)                  | 1822.9149 | 1822.9222 | 3     | 73.0 | Q60967,O88428 | Bifunctional 3'-phosphoadenosine 5'-phosphosulfate synthase 1,Bifunctional 3'-phosphoadenosine 5'-phosphosulfate synthase 2 |

|                                                |           |           |       |      |        |                                                                 |
|------------------------------------------------|-----------|-----------|-------|------|--------|-----------------------------------------------------------------|
| cQSIYAYLNHSLDLIKK + Carbamidomethyl (C)        | 2065.0666 | 2065.0733 | 3     | 75.0 | A2AJL3 | FGGY carbohydrate kinase domain-containing protein              |
| MLSLAEQQLVDcAQAFNNHGCKG + Carbamidomethyl (C)  | 2533.1512 | 2533.1597 | 3     | 72.0 | P49935 | Pro-cathepsin H                                                 |
| SLTAVcMWPQGDSR + Carbamidomethyl (C)           | 1606.7232 | 1606.7307 | 2     | 67.0 | Q9JIM1 | Equilibrative nucleoside transporter 1                          |
| ASLLccGPK + 2 Carbamidomethyl (C)              | 1004.4783 | 1004.4838 | 2     | 67.0 | Q8K3C0 | Ribonuclease kappa                                              |
| VSALNSVHcEHVEDEGESR + Carbamidomethyl (C)      | 2152.9444 | 2152.9503 | 3     | 94.0 | Q5SWU9 | Acetyl-CoA carboxylase 1                                        |
| cTLPLTGKQcVNR + 2 Carbamidomethyl (C)          | 1545.7756 | 1545.7805 | 3     | 61.0 | Q9D0K2 | Succinyl-CoA:3-ketoacid coenzyme A transferase 1, mitochondrial |
| HSGFGLcYcK + 2 Carbamidomethyl (C)             | 1295.5427 | 1295.5505 | 2     | 63.0 | P50285 | Dimethylaniline monooxygenase [N-oxide forming] 1               |
| cQYYAVSFSK + Carbamidomethyl (C)               | 1251.5594 | 1251.5669 | 2     | 62.0 | P28843 | Dipeptidyl peptidase 4                                          |
| AGVSScLK + Carbamidomethyl (C)                 | 820.4113  | 820.4141  | 2     | 62.0 | Q8R3G9 | Tetraspanin-8                                                   |
| ISGAIGPcVSLNSK + Carbamidomethyl (C)           | 1401.7286 | 1401.7415 | 2     | 61.0 | Q01405 | Protein transport protein Sec23A                                |
| LMTDTINEPILLcRFPVEIK + Carbamidomethyl (C)     | 2401.2749 | 2401.2987 | 3     | 61.0 | Q8BP47 | Asparagine--tRNA ligase, cytoplasmic                            |
| LFDEVQEVIYcPAAVHNDLEK + Carbamidomethyl (C)    | 2488.1944 | 2488.1891 | 3     | 60.0 | Q3TMH2 | Secernin-3                                                      |
| LKPGKQcSPSQGPccTAQcAFK + 4 Carbamidomethyl (C) | 2509.1335 | 2509.1466 | +3;+4 | 65.0 | O35598 | Disintegrin and metalloproteinase domain-containing protein 10  |
| GHIPYPLPPNYSYGLcSR + Carbamidomethyl (C)       | 2090.0044 | 2090.0144 | 3     | 67.0 | A2AVZ9 | Solute carrier family 43 member 3                               |
| cTPAcVSFGPK + 2 Carbamidomethyl (C)            | 1290.5737 | 1290.5761 | 2     | 58.0 | Q61316 | Heat shock 70 kDa protein 4                                     |
| TAPQcLLR + Carbamidomethyl (C)                 | 957.5066  | 957.5259  | 2     | 58.0 | Q3UE37 | Ubiquitin-conjugating enzyme E2 Z                               |
| QGDSceSIIR + Carbamidomethyl (C)               | 1163.5241 | 1163.5263 | 2     | 57.0 | Q8BMJ2 | Leucine--tRNA ligase, cytoplasmic                               |
| ASLNGADIYSGccTLK + 2 Carbamidomethyl (C)       | 1796.8073 | 1796.8048 | 2     | 55.0 | Q8R081 | Heterogeneous nuclear ribonucleoprotein L                       |
| KLGEscIFAPANVTSEK + Carbamidomethyl (C)        | 1849.9244 | 1849.9312 | +2;+3 | 57.0 | O08756 | 3-hydroxyacyl-CoA dehydrogenase type-2                          |
| WLGLEEAcQLAQFK + Carbamidomethyl (C)           | 1691.8341 | 1691.837  | 2     | 53.0 | P56380 | Bis(5'-nucleosyl)-tetraphosphatase [asymmetrical]               |
| ELANTPDcPR + Carbamidomethyl (C)               | 1171.5292 | 1171.5297 | 2     | 52.0 | P53811 | Phosphatidylinositol transfer protein beta isoform              |
| AYPIDQYPcR + Carbamidomethyl (C)               | 1281.5812 | 1281.5887 | 2     | 52.0 | Q8VC12 | Urocanate hydratase                                             |

|                                                     |           |           |          |      |               |                                                           |
|-----------------------------------------------------|-----------|-----------|----------|------|---------------|-----------------------------------------------------------|
| FSQlCAK + Carbamidomethyl (C)                       | 852.4164  | 852.419   | 2        | 51.0 | P56382        | ATP synthase subunit epsilon, mitochondrial               |
| KENQWcEEK + Carbamidomethyl (C)                     | 1249.5397 | 1249.5378 | 2        | 51.0 | Q9WTX5        | S-phase kinase-associated protein 1                       |
| AWIGGVGDcK + Carbamidomethyl (C)                    | 1061.4964 | 1061.5007 | 2        | 50.0 | O35855        | Branched-chain-amino-acid aminotransferase, mitochondrial |
| TGALcWFLDEAAAR + Carbamidomethyl (C)                | 1579.7453 | 1579.7512 | 2        | 49.0 | Q9CQ60        | 6-phosphogluconolactonase                                 |
| TAAVcVAK + Carbamidomethyl (C)                      | 818.432   | 818.4309  | 2        | 50.0 | O35643,Q9DBG3 | AP-1 complex subunit beta-1,AP-2 complex subunit beta     |
| NIYYLcAPNR + Carbamidomethyl (C)                    | 1282.6128 | 1282.6192 | 2        | 51.0 | Q9CQN1        | Heat shock protein 75 kDa, mitochondrial                  |
| EMIQKcAAIR + Carbamidomethyl (C)                    | 1347.6638 | 1347.6718 | 2        | 45.0 | P22892        | AP-1 complex subunit gamma-1                              |
| VGVDKDCdFR + 2 Carbamidomethyl (C)                  | 1600.665  | 1600.673  | +2;+3    | 49.0 | P28825        | Meprin A subunit alpha                                    |
| DDADWAHGDSQPEQVDHTLVGQcK + Carbamidomethyl (C)      | 2794.1889 | 2794.2139 | +3;+4    | 76.0 | P28825        | Meprin A subunit alpha                                    |
| KAcQIFVR + Carbamidomethyl (C)                      | 1020.5539 | 1020.5492 | 2        | 45.0 | Q9D0E1        | Heterogeneous nuclear ribonucleoprotein M                 |
| cSGPLSPGMVR + Carbamidomethyl (C)                   | 1216.5693 | 1216.5759 | 2        | 45.0 | Q8BTM8        | Filamin-A                                                 |
| RFTVELPDcSLTHFVLGDATDH R + Carbamidomethyl (C)      | 2685.297  | 2685.3113 | 4        | 45.0 | Q3U5Q7        | UMP-CMP kinase 2, mitochondrial                           |
| EAcIINANKDDRPEGLSLR + Carbamidomethyl (C)           | 2170.08   | 2170.0906 | 3        | 45.0 | O89020        | Afamin                                                    |
| SGANVLIcGPNGcGK + 2 Carbamidomethyl (C)             | 1570.7232 | 1570.7416 | 2        | 45.0 | P55096        | ATP-binding cassette sub-family D member 3                |
| cDVRDPDMVHNTVLELIK + Carbamidomethyl (C)            | 2153.0609 | 2153.0731 | +2;+3;+4 | 86.0 | Q9CQ62        | 2,4-dienoyl-CoA reductase, mitochondrial                  |
| cVAALTR + Carbamidomethyl (C)                       | 789.4167  | 789.4142  | 2        | 43.0 | Q6ZQ38        | Cullin-associated NEDD8-dissociated protein 1             |
| AASHcLPR + Carbamidomethyl (C)                      | 910.4443  | 910.4474  | 3        | 43.0 | Q9JJX6        | P2X purinoceptor 4                                        |
| AVVMIScNRHTLAANFNPVSE ER + Carbamidomethyl (C)      | 2614.2744 | 2614.2859 | 4        | 42.0 | P24668        | Cation-dependent mannose-6-phosphate receptor             |
| QTEAAPVccSAR + 2 Carbamidomethyl (C)                | 1348.5864 | 1348.5883 | 2        | 73.0 | Q8BN82        | Sialin                                                    |
| STHNEDQAScEVLTVK + Carbamidomethyl (C)              | 1816.8261 | 1816.8321 | 3        | 41.0 | Q3UYC0        | Protein phosphatase 1H                                    |
| AIGAVPLIQGEYMIPcEKVSSLP TVYLK + Carbamidomethyl (C) | 3075.6388 | 3075.6568 | 3        | 79.0 | P18242        | Cathepsin D                                               |
| VLSMTETcR + Carbamidomethyl (C)                     | 1095.5053 | 1095.5071 | 2        | 40.0 | Q3TXS7        | 26S proteasome non-ATPase regulatory subunit 1            |
| NIDPKPcTPR + Carbamidomethyl (C)                    | 1196.5972 | 1196.6002 | 3        | 40.0 | Q9JII5        | DAZ-associated protein 1                                  |

|                                                                             |           |           |       |      |               |                                                                                                                    |
|-----------------------------------------------------------------------------|-----------|-----------|-------|------|---------------|--------------------------------------------------------------------------------------------------------------------|
| clIFFKFDRPVSK + Carbamidomethyl (C)                                         | 1752.9385 | 1752.9461 | 4     | 40.0 | P54797        | Transport and Golgi organization 2 homolog                                                                         |
| ScLLHQFTEK + Carbamidomethyl (C)                                            | 1261.6125 | 1261.6194 | 3     | 40.0 | Q91V41        | Ras-related protein Rab-14                                                                                         |
| VLAGFcNEVK + Carbamidomethyl (C)                                            | 1203.5958 | 1203.5614 | 2     | 39.0 | Q61207        | Prosaposin                                                                                                         |
| TDRSILccLR + 2 Carbamidomethyl (C)                                          | 1360.6591 | 1360.6605 | 3     | 39.0 | Q9R0Q7        | Prostaglandin E synthase 3                                                                                         |
| YAAELHLVHWNTK                                                               | 1580.8099 | 1580.8108 | 3     | 53.0 | P00920        | Carbonic anhydrase 2                                                                                               |
| FVSWNcK + Carbamidomethyl (C)                                               | 939.4273  | 939.4336  | 2     | 38.0 | Q8R0M8        | Monocarboxylate transporter 5                                                                                      |
| TTLPQDcSNPKPIFSSPFNGVR + Carbamidomethyl (C)                                | 2461.206  | 2461.2215 | 3     | 38.0 | P23780        | Beta-galactosidase                                                                                                 |
| EQQcVIMAENSK + Carbamidomethyl (C)                                          | 1435.6435 | 1435.6518 | 2     | 37.0 | P20918        | Plasminogen                                                                                                        |
| ccMPYTPICIAK + 3 Carbamidomethyl (C)                                        | 1648.7122 | 1648.7202 | 2     | 37.0 | Q6P1B1        | Xaa-Pro aminopeptidase 1                                                                                           |
| TcVLFR + Carbamidomethyl (C)                                                | 794.4109  | 794.4155  | 2     | 36.0 | P55258,P61027 | Ras-related protein Rab-8A,Ras-related protein Rab-10                                                              |
| SFKHTHIDKPDcSGPAMDISNK + Carbamidomethyl (C)                                | 2484.1526 | 2484.1564 | 4     | 35.0 | P58021        | Transmembrane 9 superfamily member 2                                                                               |
| VLIANRGEIAcR + Carbamidomethyl (C)                                          | 1370.7452 | 1370.7494 | 3     | 35.0 | Q99MR8        | Methylcrotonoyl-CoA carboxylase subunit alpha, mitochondrial                                                       |
| SLPFFcR + Carbamidomethyl (C)                                               | 925.448   | 925.4509  | 2     | 35.0 | Q8CFV9        | Riboflavin kinase                                                                                                  |
| LGVLSKIALG                                                                  | 969.6223  | 969.6027  | 2     | 35.0 | Q91ZZ5        | Relaxin receptor 2                                                                                                 |
| AQNSHGEDIAEPELELQVVVM DENDNAPVcSPHDPTVNIPELS PPGTEIAR + Carbamidomethyl (C) | 5450.5307 | 5450.5665 | 4     | 34.0 | O88338        | Cadherin-16                                                                                                        |
| KVlcMGAK + Carbamidomethyl (C)                                              | 905.4827  | 905.4839  | 2     | 33.0 | Q9D7X8        | Gamma-glutamylcyclotransferase                                                                                     |
| KDDYEYcMSEYLR + Carbamidomethyl (C)                                         | 1770.7229 | 1770.7382 | 3     | 32.0 | P53612        | Geranylgeranyl transferase type-2 subunit beta                                                                     |
| QEQCRALQIQGVK                                                               | 1499.7878 | 1499.8256 | 2     | 32.0 | A2AJB1        | Coiled-coil domain-containing protein 183                                                                          |
| ELPGHTGYLScCR + 2 Carbamidomethyl (C)                                       | 1616.7076 | 1616.7137 | +2;+3 | 70.0 | P62880,P29387 | Guanine nucleotide-binding protein G(I)/G(S)/G(T) subunit beta-2,Guanine nucleotide-binding protein subunit beta-4 |
| FADQcGAR + Carbamidomethyl (C)                                              | 923.392   | 923.3898  | 2     | 36.0 | Q78KK3        | Solute carrier family 22 member 18                                                                                 |
| GSSNcGGGTHGYNNEFK + Carbamidomethyl (C)                                     | 1784.7173 | 1784.7177 | 3     | 54.0 | Q6DYE8        | Ectonucleotide pyrophosphatase/phosphodiesterase family member 3                                                   |
| RPCFSALT                                                                    | 893.4429  | 893.4456  | 2     | 62.0 | P07724        | Serum albumin                                                                                                      |
| MKcSSMQK + Carbamidomethyl (C)                                              | 1066.4609 | 1066.4587 | +2;+3 | 33.0 | P07724        | Serum albumin                                                                                                      |

|                                                               |           |           |       |       |               |                                                       |
|---------------------------------------------------------------|-----------|-----------|-------|-------|---------------|-------------------------------------------------------|
| cCSGSLVER +<br>Carbamidomethyl (C)                            | 1077.4583 | 1077.4562 | 2     | 84.0  | P07724        | Serum albumin                                         |
| LQTCCDKPLLK                                                   | 1260.657  | 1260.6573 | +2;+3 | 75.0  | P07724        | Serum albumin                                         |
| AADKDTCFSTEGPNLVTR                                            | 1923.8996 | 1923.9023 | 3     | 89.0  | P07724        | Serum albumin                                         |
| CGPGYSTPLEAMK                                                 | 1352.6104 | 1352.6115 | 2     | 81.0  | P17563        | Selenium-binding protein 1                            |
| FLHDPSATQGFVGC +<br>Carbamidomethyl (C)                       | 1534.6875 | 1534.6959 | 2     | 62.0  | P17563        | Selenium-binding protein 1                            |
| TQGFVGCALSSNIQR                                               | 1579.7777 | 1579.7819 | 2     | 75.0  | P17563        | Selenium-binding protein 1                            |
| FLHDPSATQGFVGCAL                                              | 1661.7872 | 1661.79   | 2     | 75.0  | P17563,Q63836 | Selenium-binding protein 1,Selenium-binding protein 2 |
| cGPGYSTPLEAMKGPR +<br>Carbamidomethyl (C)                     | 1719.8073 | 1719.8095 | 3     | 84.0  | P17563        | Selenium-binding protein 1                            |
| FLHDPSATQGFVGCALS                                             | 1748.8192 | 1748.8279 | 2     | 121.0 | P17563,Q63836 | Selenium-binding protein 1,Selenium-binding protein 2 |
| DELHHSGWNTCSSCFDSTK                                           | 2209.8793 | 2209.8845 | 3     | 90.0  | P17563,Q63836 | Selenium-binding protein 1,Selenium-binding protein 2 |
| DELHHSGWNTCSSCFDSTK +<br>Carbamidomethyl (C)                  | 2334.927  | 2266.9086 | 3     | 70.0  | P17563,Q63836 | Selenium-binding protein 1,Selenium-binding protein 2 |
| cNVSSLHTSHCLASGEVMVSTL<br>GD LQGN GK +<br>Carbamidomethyl (C) | 3168.4638 | 3168.4996 | +3;+4 | 82.0  | P17563        | Selenium-binding protein 1                            |
| DGPMCMH                                                       | 789.2608  | 789.2604  | 2     | 48.0  | P24270        | Catalase                                              |
| DGPMCMH +<br>Carbamidomethyl (C)                              | 846.2823  | 846.2802  | 2     | 48.0  | P24270        | Catalase                                              |
| DGPMCMHD                                                      | 904.2877  | 904.2882  | 2     | 40.0  | P24270        | Catalase                                              |
| IPVNCPIR                                                      | 960.4851  | 960.4854  | 2     | 52.0  | P24270        | Catalase                                              |
| LCENIAGHLK                                                    | 1096.5699 | 1096.569  | +2;+3 | 81.0  | P24270        | Catalase                                              |
| QIPVNCPIR +<br>Carbamidomethyl (C)                            | 1145.5652 | 1145.5632 | 2     | 49.0  | P24270        | Catalase                                              |
| LcENIAGHLK +<br>Carbamidomethyl (C)                           | 1153.5914 | 1153.5916 | +2;+3 | 59.0  | P24270        | Catalase                                              |
| DGPMCMHDNQGAPNY                                               | 1705.6283 | 1705.6331 | 2     | 70.0  | P24270        | Catalase                                              |
| HR LGPNYLQIPVNCPIR                                            | 2039.0523 | 2039.0586 | 3     | 63.0  | P24270        | Catalase                                              |
| LCENIAGHLKDAQLFIQK                                            | 2040.0826 | 2040.0871 | +3;+4 | 89.0  | P24270        | Catalase                                              |
| LcENIAGHLKDAQLFIQK +<br>Carbamidomethyl (C)                   | 2097.1041 | 2097.1072 | +3;+4 | 68.0  | P24270        | Catalase                                              |
| DGPMCMHDNQGAPNYYPN<br>SFAPEQQR                                | 3110.2705 | 3110.2963 | 3     | 107.0 | P24270        | Catalase                                              |
| VAFITGGGTGLGKAMTFLSTL<br>GAQCVIASR                            | 3027.5886 | 3027.6082 | 3     | 62.0  | Q9CQ62        | 2,4-dienoyl-CoA reductase, mitochondrial              |
| VAFITGGGTGLGKAMTFLSTL<br>GAQCVIASR +<br>Carbamidomethyl (C)   | 3084.61   | 3084.6217 | 3     | 45.0  | Q9CQ62        | 2,4-dienoyl-CoA reductase, mitochondrial              |
| LHPAPEATVAATCA                                                | 1350.6602 | 1350.6625 | 2     | 62.0  | Q7TNG8        | Probable D-lactate dehydrogenase,<br>mitochondrial    |
| IEFLDDVMMDACNR                                                | 1670.7102 | 1670.7243 | 2     | 76.0  | Q7TNG8        | Probable D-lactate dehydrogenase,<br>mitochondrial    |
| RALALGGTCTGEHGIGLGK                                           | 1809.9519 | 1809.9507 | 3     | 118.0 | Q7TNG8        | Probable D-lactate dehydrogenase,<br>mitochondrial    |

|                                                                            |           |           |       |       |               |                                                                                                           |
|----------------------------------------------------------------------------|-----------|-----------|-------|-------|---------------|-----------------------------------------------------------------------------------------------------------|
| cPVAPTLFLEFHGSQQTLAEQL<br>QR + Carbamidomethyl (C)                         | 2769.3908 | 2769.3994 | 3     | 74.0  | Q7TNG8        | Probable D-lactate dehydrogenase,<br>mitochondrial                                                        |
| DSGLWFPVDPGADASLCGMA<br>ATGASGTNAVR                                        | 2993.3648 | 2993.3665 | +2;+3 | 126.0 | Q7TNG8        | Probable D-lactate dehydrogenase,<br>mitochondrial                                                        |
| CVPSIFR                                                                    | 820.4265  | 820.4268  | 2     | 42.0  | A2ARV4        | Low-density lipoprotein receptor-related<br>protein 2                                                     |
| cISQDWK +<br>Carbamidomethyl (C)                                           | 935.4171  | 935.415   | 2     | 36.0  | A2ARV4        | Low-density lipoprotein receptor-related<br>protein 2                                                     |
| cDFSSSVR +<br>Carbamidomethyl (C)                                          | 956.4022  | 956.4     | 2     | 49.0  | A2ARV4        | Low-density lipoprotein receptor-related<br>protein 2                                                     |
| CADGSSCINSR                                                                | 1111.4386 | 1111.4358 | 2     | 97.0  | A2ARV4        | Low-density lipoprotein receptor-related<br>protein 2                                                     |
| SNEFQCVSPHR                                                                | 1302.5775 | 1302.5773 | +2;+3 | 68.0  | A2ARV4        | Low-density lipoprotein receptor-related<br>protein 2                                                     |
| GSYECFCVDGFK                                                               | 1353.537  | 1353.5376 | 2     | 58.0  | A2ARV4        | Low-density lipoprotein receptor-related<br>protein 2                                                     |
| cACDPEYTLSDGR +<br>Carbamidomethyl (C)                                     | 1614.629  | 1614.6371 | 2     | 104.0 | A2ARV4        | Low-density lipoprotein receptor-related<br>protein 2                                                     |
| HQcLcEEGYILER + 2<br>Carbamidomethyl (C)                                   | 1705.7552 | 1705.7663 | 2     | 63.0  | A2ARV4        | Low-density lipoprotein receptor-related<br>protein 2                                                     |
| cGCAFGTLEDDGKNCATSR +<br>Carbamidomethyl (C)                               | 2003.8136 | 2003.8165 | 3     | 81.0  | A2ARV4        | Low-density lipoprotein receptor-related<br>protein 2                                                     |
| EVITANRLQNVCLSDWISR                                                        | 2492.2482 | 2492.2694 | 3     | 93.0  | A2ARV4        | Low-density lipoprotein receptor-related<br>protein 2                                                     |
| QPSSPNcASATcSHLCLLSAQE<br>PR + 2 Carbamidomethyl (C)                       | 2710.2261 | 2710.2401 | 3     | 85.0  | A2ARV4        | Low-density lipoprotein receptor-related<br>protein 2                                                     |
| AYDADLQTGTNYCSQTTHPN<br>GDCSHFCFPVNFQR                                     | 3933.657  | 3933.6733 | +3;+4 | 88.0  | A2ARV4        | Low-density lipoprotein receptor-related<br>protein 2                                                     |
| DVTIFDEHVQPLSPAELNNNPC<br>LQSNNGcSHFcFALPELPTPK +<br>2 Carbamidomethyl (C) | 4792.236  | 4792.2525 | 4     | 52.0  | A2ARV4        | Low-density lipoprotein receptor-related<br>protein 2                                                     |
| TTNCLAPLAK                                                                 | 1030.5481 | 1030.55   | 2     | 66.0  | P16858,Q64467 | Glyceraldehyde-3-phosphate<br>dehydrogenase,Glyceraldehyde-3-<br>phosphate dehydrogenase, testis-specific |



|                                                                                            |           |           |       |      |               |                                                                                                    |
|--------------------------------------------------------------------------------------------|-----------|-----------|-------|------|---------------|----------------------------------------------------------------------------------------------------|
| AScTTNCLAPLAK + Carbamidomethyl (C)                                                        | 1416.6741 | 1416.6768 | 2     | 64.0 | P16858,Q64467 | Glyceraldehyde-3-phosphate dehydrogenase,Glyceraldehyde-3-phosphate dehydrogenase, testis-specific |
| IVEGLMTTVHAITATQK                                                                          | 1811.9815 | 1811.9859 | 3     | 50.0 | P16858        | Glyceraldehyde-3-phosphate dehydrogenase                                                           |
| LTGMAFRVPTPNVSVVDLTCR                                                                      | 2275.1817 | 2275.1822 | 3     | 61.0 | P16858,Q64467 | Glyceraldehyde-3-phosphate dehydrogenase,Glyceraldehyde-3-phosphate dehydrogenase, testis-specific |
| SHCSLGIK                                                                                   | 843.4273  | 843.4254  | 2     | 34.0 | Q8K0L3        | Acyl-coenzyme A synthetase ACSM2, mitochondrial                                                    |
| VLSGAcGLHR + Carbamidomethyl (C)                                                           | 1068.5499 | 1068.5486 | 3     | 58.0 | Q8K0L3        | Acyl-coenzyme A synthetase ACSM2, mitochondrial                                                    |
| MLLQQDLSSYKFPHLHSCFSGG<br>ETLLPETLENWK                                                     | 3947.9226 | 3947.9422 | +3;+4 | 55.0 | Q8K0L3        | Acyl-coenzyme A synthetase ACSM2, mitochondrial                                                    |
| MLLQQDLSSYKFPHLHScFSGG<br>ETLLPETLENWK +<br>Carbamidomethyl (C)                            | 4004.9441 | 4004.9674 | +3;+5 | 59.0 | Q8K0L3        | Acyl-coenzyme A synthetase ACSM2, mitochondrial                                                    |
| MDAASWTGLSTSDIIWTISDT<br>AWIMNILGAFLEPWVVLGAcIFV<br>HLLPKFDSQTVLK +<br>Carbamidomethyl (C) | 6346.2237 | 6346.2749 | 4     | 53.0 | Q8K0L3        | Acyl-coenzyme A synthetase ACSM2, mitochondrial                                                    |
| VGCNVDGR                                                                                   | 818.3705  | 818.3697  | 2     | 81.0 | P35979        | 60S ribosomal protein L12                                                                          |
| VGcNVDGR +<br>Carbamidomethyl (C)                                                          | 875.392   | 875.3937  | 2     | 68.0 | P35979        | 60S ribosomal protein L12                                                                          |
| SVGCNVDGR                                                                                  | 905.4025  | 905.4026  | 2     | 82.0 | P35979        | 60S ribosomal protein L12                                                                          |
| GYLGPQLPDcLKGCdVvVIPA<br>GVPR + 2 Carbamidomethyl<br>(C)                                   | 2944.4827 | 2808.448  | 3     | 66.0 | P08249        | Malate dehydrogenase, mitochondrial                                                                |
| MGPQPQGVLR                                                                                 | 1081.5703 | 1081.5729 | 2     | 35.0 | Q91XE4        | N-acyl-aromatic-L-amino acid amidohydrolase (carboxylate-forming)                                  |
| NPAATAAcCR +<br>Carbamidomethyl (C)                                                        | 1101.4695 | 1101.4685 | 2     | 43.0 | Q91XE4        | N-acyl-aromatic-L-amino acid amidohydrolase (carboxylate-forming)                                  |
| NPAATAACcR +<br>Carbamidomethyl (C)                                                        | 1101.4695 | 1101.4727 | 2     | 82.0 | Q91XE4        | N-acyl-aromatic-L-amino acid amidohydrolase (carboxylate-forming)                                  |
| NPAATAAccR + 2<br>Carbamidomethyl (C)                                                      | 1158.491  | 1158.4908 | 2     | 81.0 | Q91XE4        | N-acyl-aromatic-L-amino acid amidohydrolase (carboxylate-forming)                                  |

|                                                            |           |           |          |       |        |                                                                   |
|------------------------------------------------------------|-----------|-----------|----------|-------|--------|-------------------------------------------------------------------|
| VAVTGGTHGNEMCGVYLAR                                        | 1933.9139 | 1933.9107 | 3        | 65.0  | Q91XE4 | N-acyl-aromatic-L-amino acid amidohydrolase (carboxylate-forming) |
| VAVTGGTHGNEMCGVYLAR + Carbamidomethyl (C)                  | 1990.9353 | 1990.951  | +2;+3    | 152.0 | Q91XE4 | N-acyl-aromatic-L-amino acid amidohydrolase (carboxylate-forming) |
| YSPIADMLCEAGR                                              | 1424.6428 | 1424.6495 | 2        | 101.0 | Q9DBM2 | Peroxisomal bifunctional enzyme                                   |
| IGVVVGNCYGFVGNR                                            | 1552.7821 | 1552.7872 | 2        | 81.0  | Q9DBM2 | Peroxisomal bifunctional enzyme                                   |
| NPADGACLLEK                                                | 1129.5437 | 1129.5408 | 2        | 80.0  | Q91V76 | Ester hydrolase C11orf54 homolog                                  |
| YSQKYHDFG                                                  | 1143.4985 | 1143.4923 | 2        | 33.0  | Q91V76 | Ester hydrolase C11orf54 homolog                                  |
| RTGELNFVSCMR                                               | 1411.67   | 1411.6707 | 3        | 52.0  | Q91V76 | Ester hydrolase C11orf54 homolog                                  |
| GLTDNFADVQSVVDCPDLTk                                       | 2235.073  | 2235.051  | 2        | 55.0  | Q91V76 | Ester hydrolase C11orf54 homolog                                  |
| AHIMPAEFSSCLNSDEAVNK                                       | 2259.03   | 2259.0306 | +2;+3    | 122.0 | Q91V76 | Ester hydrolase C11orf54 homolog                                  |
| VcLIGCGFSTGYGSAVK + Carbamidomethyl (C)                    | 1785.843  | 1785.8454 | 2        | 76.0  | P00329 | Alcohol dehydrogenase 1                                           |
| AMANCQAAQGQYVH                                             | 1490.6394 | 1490.6428 | 2        | 107.0 | Q91Y97 | Fructose-bisphosphate aldolase B                                  |
| ALNDHHVYLEGTLKPNMVTAGHACTK                                 | 2932.4688 | 2932.4838 | +3;+5    | 78.0  | Q91Y97 | Fructose-bisphosphate aldolase B                                  |
| ALNDHHVYLEGTLKPNMVTAGHACTK + Carbamidomethyl (C)           | 2989.4902 | 2989.4951 | +3;+4;+5 | 80.0  | Q91Y97 | Fructose-bisphosphate aldolase B                                  |
| YASicQQNGLVPIVEPEVLPDG DHDLEHCQYVSEK + Carbamidomethyl (C) | 4048.8823 | 4048.9009 | +3;+4    | 52.0  | Q91Y97 | Fructose-bisphosphate aldolase B                                  |
| SAMTPHGPADCFEK                                             | 1604.6599 | 1604.6608 | +2;+3    | 79.0  | O09173 | Homogentisate 1,2-dioxygenase                                     |
| NLYAEQLSGSAFTCPR                                           | 1755.825  | 1755.825  | 2        | 33.0  | O09173 | Homogentisate 1,2-dioxygenase                                     |
| SNNGLAVHIFLCNSSMENR                                        | 2104.9782 | 2104.9922 | +2;+3    | 99.0  | O09173 | Homogentisate 1,2-dioxygenase                                     |
| NPQVcPYNLYAEQLSGSAFTCP R + Carbamidomethyl (C)             | 2682.2206 | 2682.2366 | +2;+3    | 103.0 | O09173 | Homogentisate 1,2-dioxygenase                                     |
| QGGFLPGGSLHSAMTPHGP DADCFEK                                | 2712.2061 | 2712.2403 | +3;+4    | 113.0 | O09173 | Homogentisate 1,2-dioxygenase                                     |
| GQNNPQVcPYNLYAEQLSGSA FTCP R + Carbamidomethyl (C)         | 2981.3436 | 2981.3552 | +2;+3    | 78.0  | O09173 | Homogentisate 1,2-dioxygenase                                     |
| cTNSSYEDMGR + Carbamidomethyl (C)                          | 1318.4918 | 1318.529  | 2        | 58.0  | Q99KI0 | Aconitate hydratase, mitochondrial                                |
| cTTDHISAAGPWLK + Carbamidomethyl (C)                       | 1555.7453 | 1555.7618 | +2;+3    | 46.0  | Q99KI0 | Aconitate hydratase, mitochondrial                                |
| DVGGIVLANAcGPCIGQWDR + Carbamidomethyl (C)                 | 2168.0143 | 2168.0226 | +2;+3    | 131.0 | Q99KI0 | Aconitate hydratase, mitochondrial                                |

|                                                        |           |           |          |       |        |                                                                      |
|--------------------------------------------------------|-----------|-----------|----------|-------|--------|----------------------------------------------------------------------|
| DVGGIVLANACGPcIGQWDR + Carbamidomethyl (C)             | 2168.0143 | 2168.0302 | +2;+3    | 109.0 | Q99K10 | Aconitate hydratase, mitochondrial                                   |
| VVPCLVAPVAGR                                           | 1179.6798 | 1179.6791 | 2        | 34.0  | Q80X90 | Filamin-B                                                            |
| IEYDDQNDGSDVK                                          | 1599.6359 | 1599.6371 | 2        | 47.0  | Q80X90 | Filamin-B                                                            |
| SGCTINNPAEFIVDPK                                       | 1703.8189 | 1703.8218 | 2        | 45.0  | Q80X90 | Filamin-B                                                            |
| VGEPGILcVdCSEAGPGLGLE AVSDSGAK + 2 Carbamidomethyl (C) | 3012.4056 | 3012.4207 | 3        | 121.0 | Q80X90 | Filamin-B                                                            |
| CPVIIHPGR                                              | 990.5433  | 990.5432  | 3        | 41.0  | Q60866 | Phosphotriesterase-related protein                                   |
| QLGCPVIIHPGR                                           | 1288.7074 | 1288.7101 | 3        | 50.0  | Q60866 | Phosphotriesterase-related protein                                   |
| AQAQLGCPVIIHPGR                                        | 1558.8402 | 1558.8438 | 3        | 54.0  | Q60866 | Phosphotriesterase-related protein                                   |
| ATAHAQAQLGCPVIIHPGR                                    | 1939.021  | 1939.0257 | 4        | 39.0  | Q60866 | Phosphotriesterase-related protein                                   |
| cGVIGEIGCSWPLTDSER + Carbamidomethyl (C)               | 1977.8925 | 1977.9016 | 2        | 139.0 | Q60866 | Phosphotriesterase-related protein                                   |
| cGVIGEIGcSWPLTDSER + 2 Carbamidomethyl (C)             | 2102.9401 | 2034.9242 | 2        | 123.0 | Q60866 | Phosphotriesterase-related protein                                   |
| LIGPNCPGVINPGECK                                       | 1609.7956 | 1609.7978 | 2        | 87.0  | Q9WUM5 | Succinate--CoA ligase [ADP/GDP-forming] subunit alpha, mitochondrial |
| CATPPDDGNLcR + Carbamidomethyl (C)                     | 1385.5704 | 1385.5801 | 2        | 49.0  | Q64442 | Sorbitol dehydrogenase                                               |
| FcATPPDDGNLcR + Carbamidomethyl (C)                    | 1532.6388 | 1532.6394 | 2        | 42.0  | Q64442 | Sorbitol dehydrogenase                                               |
| CGSVLVR                                                | 732.3952  | 732.3938  | 2        | 64.0  | P25444 | 40S ribosomal protein S2                                             |
| cTATLGNFAK + Carbamidomethyl (C)                       | 1081.5226 | 1081.525  | 2        | 73.0  | P25444 | 40S ribosomal protein S2                                             |
| AGIDDcYTSAR + Carbamidomethyl (C)                      | 1227.519  | 1227.5111 | 2        | 55.0  | P25444 | 40S ribosomal protein S2                                             |
| IGKPHTVPCKVTGR                                         | 1491.8344 | 1491.8316 | +2;+3;+4 | 57.0  | P25444 | 40S ribosomal protein S2                                             |
| KLLMMAGIDDCYTSAR                                       | 1786.8416 | 1786.8461 | +2;+3    | 99.0  | P25444 | 40S ribosomal protein S2                                             |
| LVQAFQYDEHGEVCPAGW                                     | 2148.9575 | 2148.964  | 2        | 51.0  | Q61171 | Peroxisoredoxin-2                                                    |
| KTSYPDCIK                                              | 1053.5165 | 1053.5128 | 2        | 70.0  | Q92111 | Serotransferrin                                                      |
| WCAVSEHENTK                                            | 1302.5663 | 1302.5672 | 2        | 72.0  | Q92111 | Serotransferrin                                                      |
| CAPNNKEEYNGYTGAFR                                      | 1932.8424 | 1932.8304 | 3        | 55.0  | Q92111 | Serotransferrin                                                      |
| NcIVLIDSTPYR + Carbamidomethyl (C)                     | 1449.7286 | 1449.7324 | 2        | 50.0  | P62242 | 40S ribosomal protein S8                                             |
| LLAcIASRPGQcGR + 2 Carbamidomethyl (C)                 | 1625.813  | 1625.8203 | +2;+3    | 49.0  | P62242 | 40S ribosomal protein S8                                             |
| LDVGNFWSGSEcCTR + Carbamidomethyl (C)                  | 1797.7451 | 1797.747  | 2        | 101.0 | P62242 | 40S ribosomal protein S8                                             |
| ALRLDVGNFWSGSEcCTR + Carbamidomethyl (C)               | 2137.9673 | 2137.9682 | +2;+3    | 95.0  | P62242 | 40S ribosomal protein S8                                             |
| cDVDFDIAGPSIR + Carbamidomethyl (C)                    | 1463.6715 | 1463.6747 | 2        | 68.0  | Q60932 | Voltage-dependent anion-selective channel protein 1                  |
| GVPGAFTPGCSK                                           | 1119.5383 | 1119.5433 | 2        | 79.0  | P99029 | Peroxisoredoxin-5, mitochondrial                                     |
| IPEWWLANVACLR                                          | 1569.8126 | 1569.81   | 2        | 44.0  | Q3UNX5 | Acyl-coenzyme A synthetase ACSM3, mitochondrial                      |
| QAFTDVATGSLGQGLGAACG MAYTGK                            | 2474.157  | 2474.163  | 3        | 139.0 | P40142 | Transketolase                                                        |
| CNCVCPGTVDTPSLQER                                      | 1820.7856 | 1820.7869 | 2        | 91.0  | Q8JZV9 | 3-hydroxybutyrate dehydrogenase type 2                               |

|                                                            |           |           |       |       |        |                                                                |
|------------------------------------------------------------|-----------|-----------|-------|-------|--------|----------------------------------------------------------------|
| SMCPSIILDKDGQVR                                            | 1660.8277 | 1660.831  | +2;+3 | 111.0 | Q60928 | Gamma-glutamyltranspeptidase 1                                 |
| VAPSPANFIKPGKQPLSSMCP<br>IILDK                             | 2837.5183 | 2837.5452 | +3;+4 | 90.0  | Q60928 | Gamma-glutamyltranspeptidase 1                                 |
| VAPSPANFIKPGKQPLSSMcPSI<br>IILDK + Carbamidomethyl (C)     | 2894.5398 | 2894.548  | +3;+4 | 60.0  | Q60928 | Gamma-glutamyltranspeptidase 1                                 |
| cQLLVYPGAFNLTGPAHWEL<br>LQR + Carbamidomethyl (C)          | 2783.4217 | 2783.4339 | 3     | 96.0  | Q9JHW2 | Omega-amidase NIT2                                             |
| NELIAHcCHAR +<br>Carbamidomethyl (C)                       | 1219.588  | 1219.5881 | 3     | 47.0  | Q9JII6 | Alcohol dehydrogenase [NADP(+)]                                |
| VYGNETEIGEALKESVSGSK                                       | 2066.0168 | 2065.9703 | 3     | 55.0  | Q9JII6 | Alcohol dehydrogenase [NADP(+)]                                |
| IGIASQALGIAQASLDCAVK                                       | 1928.0401 | 1928.0421 | 3     | 120.0 | Q07417 | Short-chain specific acyl-CoA<br>dehydrogenase, mitochondrial  |
| SPFLCR                                                     | 721.3581  | 721.359   | 2     | 37.0  | Q8BFR5 | Elongation factor Tu, mitochondrial                            |
| CPGHADYVK                                                  | 988.4436  | 988.4417  | 3     | 45.0  | Q8BFR5 | Elongation factor Tu, mitochondrial                            |
| ELLTEFGYKGEETPVIVGSALCA<br>LEQR                            | 2951.495  | 2951.5105 | 3     | 102.0 | Q8BFR5 | Elongation factor Tu, mitochondrial                            |
| TFDTCPLGALVTK                                              | 1608.8222 | 1608.8314 | 2     | 61.0  | Q3TC72 | Fumarylacetoacetate hydrolase domain-<br>containing protein 2A |
| KSAYCPYSR                                                  | 1073.4964 | 1073.4928 | 2     | 46.0  | P56389 | Cytidine deaminase                                             |
| AIAISSDLQEEFISPCGAcR +<br>Carbamidomethyl (C)              | 2234.0347 | 2234.0624 | 2     | 132.0 | P56389 | Cytidine deaminase                                             |
| IFSGcNIENAcYPLGVcAER + 2<br>Carbamidomethyl (C)            | 2408.0599 | 2408.0776 | 2     | 126.0 | P56389 | Cytidine deaminase                                             |
| IFSGcNIENAcYPLGVcAER + 2<br>Carbamidomethyl (C)            | 2408.0599 | 2408.0661 | 3     | 39.0  | P56389 | Cytidine deaminase                                             |
| LcGSGFQSIvSGcQEICSK + 2<br>Carbamidomethyl (C)             | 2194.9697 | 2194.9576 | 2     | 105.0 | Q8BWT1 | 3-ketoacyl-CoA thiolase, mitochondrial                         |
| LcGSGFQSIvSGcQEICSK + 2<br>Carbamidomethyl (C)             | 2194.9697 | 2194.9724 | 2     | 114.0 | Q8BWT1 | 3-ketoacyl-CoA thiolase, mitochondrial                         |
| VVGYFVSGCDPTIMGIGVPAI<br>NGALKK                            | 2802.4812 | 2802.4931 | 3     | 77.0  | Q8BWT1 | 3-ketoacyl-CoA thiolase, mitochondrial                         |
| LLDFCK                                                     | 737.3782  | 737.3797  | 2     | 48.0  | Q91WR5 | Aldo-keto reductase family 1 member<br>C21                     |
| TALPLECPK                                                  | 970.5157  | 970.5164  | 2     | 81.0  | Q91WR5 | Aldo-keto reductase family 1 member<br>C21                     |
| GTALPLECPK                                                 | 1027.5372 | 1027.5432 | 2     | 80.0  | Q91WR5 | Aldo-keto reductase family 1 member<br>C21                     |
| cHcVILNDGNFIPVLGFGTALPL<br>EcPK + 3 Carbamidomethyl<br>(C) | 3176.5497 | 3176.5597 | 3     | 35.0  | Q91WR5 | Aldo-keto reductase family 1 member<br>C21                     |
| GcITIIGGGDTATcCAK + 2<br>Carbamidomethyl (C)               | 1832.8107 | 1832.8104 | 2     | 108.0 | P09411 | Phosphoglycerate kinase 1                                      |
| GIPAGWMLDCGTESSK                                           | 1835.8546 | 1835.8604 | 3     | 80.0  | P09411 | Phosphoglycerate kinase 1                                      |
| TGQATVASGIPAGWMLDCG<br>TESSK                               | 2551.2047 | 2551.214  | +2;+3 | 107.0 | P09411 | Phosphoglycerate kinase 1                                      |

|                                           |           |           |       |       |               |                                                                                                 |
|-------------------------------------------|-----------|-----------|-------|-------|---------------|-------------------------------------------------------------------------------------------------|
| THICVTR                                   | 828.4276  | 828.4276  | 2     | 34.0  | P51174        | Long-chain specific acyl-CoA dehydrogenase, mitochondrial                                       |
| LLIAELAISAcEFMFEETR + Carbamidomethyl (C) | 2310.1275 | 2310.1266 | 3     | 67.0  | P51174        | Long-chain specific acyl-CoA dehydrogenase, mitochondrial                                       |
| TPCTTVNK                                  | 862.4219  | 862.4229  | 2     | 70.0  | Q8QZT1        | Acetyl-CoA acetyltransferase, mitochondrial                                                     |
| IHMGNCAENTAKK                             | 1415.6649 | 1415.6634 | +2;+3 | 73.0  | Q8QZT1        | Acetyl-CoA acetyltransferase, mitochondrial                                                     |
| KIHMGNAENTAK                              | 1415.6649 | 1415.6687 | +2;+3 | 49.0  | Q8QZT1        | Acetyl-CoA acetyltransferase, mitochondrial                                                     |
| IVVHMAHALKPGEFGLASICNGGGASALLIEKL         | 3372.805  | 3372.825  | +4;+5 | 66.0  | Q8QZT1        | Acetyl-CoA acetyltransferase, mitochondrial                                                     |
| VLRNFDSLISNCTEELNAGVEVLK                  | 2878.4382 | 2878.4418 | 3     | 78.0  | P47791        | Glutathione reductase, mitochondrial                                                            |
| AGPNTNGSQFFIcTAK + Carbamidomethyl (C)    | 1711.7988 | 1711.8046 | 2     | 48.0  | P17742        | Peptidyl-prolyl cis-trans isomerase A                                                           |
| cLELIK + Carbamidomethyl (C)              | 774.4309  | 774.4332  | 2     | 44.0  | Q922D8,P48754 | C-1-tetrahydrofolate synthase, cytoplasmic, Breast cancer type 1 susceptibility protein homolog |
| IVGAPMHDLLLWNNATVTTCHSK                   | 2520.2617 | 2520.2634 | 4     | 34.0  | Q922D8        | C-1-tetrahydrofolate synthase, cytoplasmic                                                      |
| GEWIKPGAVVIDCGINYVPDDTKPNGR               | 2912.4491 | 2912.4621 | +3;+4 | 106.0 | Q922D8        | C-1-tetrahydrofolate synthase, cytoplasmic                                                      |
| ERVcNLIDSGTK + Carbamidomethyl (C)        | 1390.6875 | 1390.6896 | 3     | 61.0  | Q9EQ20        | Methylmalonate-semialdehyde dehydrogenase [acylating], mitochondrial                            |
| GLQVVEHACSVTSLMLGETMPSITK                 | 2630.3118 | 2630.3125 | 3     | 50.0  | Q9EQ20        | Methylmalonate-semialdehyde dehydrogenase [acylating], mitochondrial                            |
| GAQVIENCAVTGIR                            | 1429.7347 | 1429.7416 | 2     | 72.0  | Q99LB7        | Sarcosine dehydrogenase, mitochondrial                                                          |
| HWHADLRPDDSPLEAGLAFTCK                    | 2478.175  | 2478.1813 | +3;+4 | 38.0  | Q99LB7        | Sarcosine dehydrogenase, mitochondrial                                                          |
| STVCGPESFTPDKPLMGEAPELR                   | 2597.2254 | 2597.2296 | +3;+4 | 105.0 | Q99LB7        | Sarcosine dehydrogenase, mitochondrial                                                          |
| ACVVHGSDLKDMTSEELDDILR                    | 2445.1516 | 2445.1553 | 4     | 67.0  | Q8VDN2        | Sodium/potassium-transporting ATPase subunit alpha-1                                            |
| AEGSDVANAVLDGADCIMLSGETAK                 | 2436.1148 | 2436.1206 | 3     | 150.0 | P52480        | Pyruvate kinase PKM                                                                             |
| AGKPVICATQMLESMIKRPRTR                    | 2554.3909 | 2554.3924 | 4     | 37.0  | P52480        | Pyruvate kinase PKM                                                                             |
| AEGSDVANAVLDGADCIMLSGETAKGDYPLEAVR        | 3436.6126 | 3436.6471 | 3     | 175.0 | P52480        | Pyruvate kinase PKM                                                                             |

|                                                        |           |           |       |       |               |                                                                |
|--------------------------------------------------------|-----------|-----------|-------|-------|---------------|----------------------------------------------------------------|
| IEGDMIVCAAYAHELK                                       | 1858.8957 | 1858.8993 | 3     | 72.0  | P47962        | 60S ribosomal protein L5                                       |
| DYFVSCPGR                                              | 1042.4542 | 1042.4573 | 2     | 50.0  | Q91X72        | Hemopexin                                                      |
| CSPDPGLTALLSDHR                                        | 1580.7617 | 1580.7667 | 3     | 102.0 | Q91X72        | Hemopexin                                                      |
| AEPPQCTSLAWSADGQTLFAG<br>YTDNLVR                       | 3010.4131 | 3010.4314 | +2;+3 | 96.0  | P68040        | Receptor of activated protein C kinase 1                       |
| AVIECADSAHGLK                                          | 1312.6445 | 1312.6448 | 2     | 43.0  | Q9DCZ1        | GMP reductase 1                                                |
| SAVIECADSAHGLK                                         | 1399.6765 | 1399.6762 | +2;+3 | 86.0  | Q9DCZ1        | GMP reductase 1                                                |
| NCLTNFHGMDLTR                                          | 1520.6864 | 1520.6909 | +2;+3 | 82.0  | P97351        | 40S ribosomal protein S3a                                      |
| NcLTNFHGMDLTR +<br>Carbamidomethyl (C)                 | 1577.7079 | 1577.712  | +2;+3 | 78.0  | P97351        | 40S ribosomal protein S3a                                      |
| CSQAVYAAEK                                             | 1068.491  | 1068.4889 | 2     | 72.0  | P97315        | Cysteine and glycine-rich protein 1                            |
| HKNMSVHLSPCFR                                          | 1554.7548 | 1554.7556 | +3;+4 | 44.0  | P62281        | 40S ribosomal protein S11                                      |
| IQAGQCGNQIGAK                                          | 1286.6401 | 1286.6411 | 2     | 78.0  | P99024,Q9ERD7 | Tubulin beta-5 chain,Tubulin beta-3 chain                      |
| IQAGQcGNQIGAK +<br>Carbamidomethyl (C)                 | 1343.6616 | 1343.6632 | 2     | 69.0  | P99024,Q9ERD7 | Tubulin beta-5 chain,Tubulin beta-3 chain                      |
| LQAGQCGNQIGAK                                          | 1286.6401 | 1286.6411 | 2     | 78.0  | Q9D6F9,P68372 | Tubulin beta-4A chain,Tubulin beta-4B<br>chain                 |
| LQAGQcGNQIGAK +<br>Carbamidomethyl (C)                 | 1343.6616 | 1343.6632 | 2     | 69.0  | Q9D6F9,P68372 | Tubulin beta-4A chain,Tubulin beta-4B<br>chain                 |
| FAELVYTFGWHSPEcEFVR +<br>Carbamidomethyl (C)           | 2373.0889 | 2373.1043 | 3     | 105.0 | P16460        | Argininosuccinate synthase                                     |
| ANVPNKVIQCFAETGQVQK                                    | 2073.0677 | 2073.0759 | +2;+3 | 103.0 | Q68FD5        | Clathrin heavy chain 1                                         |
| MTEQPMMcAYCVTEPSAGSD<br>VAAIK + Carbamidomethyl<br>(C) | 2757.1828 | 2757.1878 | 2     | 48.0  | P45952        | Medium-chain specific acyl-CoA<br>dehydrogenase, mitochondrial |
| TPVCTTELGR                                             | 1075.5332 | 1075.5318 | 2     | 67.0  | O08709        | Peroxioredoxin-6                                               |
| VCHAHPTLSEAFR                                          | 1466.7089 | 1466.7102 | +2;+3 | 64.0  | O08749        | Dihydrolipoyl dehydrogenase,<br>mitochondrial                  |
| TVcIEKNETLGGTCLNVGcIPSK<br>+ 2 Carbamidomethyl (C)     | 2628.2598 | 2628.2647 | 3     | 67.0  | O08749        | Dihydrolipoyl dehydrogenase,<br>mitochondrial                  |
| SGQGAFGNMCR                                            | 1126.4648 | 1126.4656 | 2     | 69.0  | Q9D8E6        | 60S ribosomal protein L4                                       |
| SGQGAFGNMcR +<br>Carbamidomethyl (C)                   | 1183.4863 | 1183.4897 | 2     | 80.0  | Q9D8E6        | 60S ribosomal protein L4                                       |
| FCIWTESAFR                                             | 1258.5805 | 1258.5881 | 2     | 61.0  | Q9D8E6        | 60S ribosomal protein L4                                       |
| YAICALAASALPALVMSK                                     | 1878.9947 | 1879.0006 | +2;+3 | 103.0 | Q9D8E6        | 60S ribosomal protein L4                                       |
| SIIPVVMAGIIAYGLVVAVLIAN<br>SLTDGITLYR                  | 3528.0405 | 3528.0453 | +3;+4 | 79.0  | P63082        | V-type proton ATPase 16 kDa proteolipid<br>subunit             |
| GPSQCQETIR                                             | 1117.5186 | 1117.5157 | 2     | 61.0  | Q9DCW4        | Electron transfer flavoprotein subunit<br>beta                 |
| HSMNPFcEIAVEEAVR +<br>Carbamidomethyl (C)              | 1887.8607 | 1887.8617 | +2;+3 | 82.0  | Q9DCW4        | Electron transfer flavoprotein subunit<br>beta                 |
| cIPALDSLKPANEDQK +<br>Carbamidomethyl (C)              | 1797.8931 | 1797.9113 | +2;+3 | 112.0 | P63038        | 60 kDa heat shock protein, mitochondrial                       |

|                                                          |           |           |          |       |                      |                                                 |
|----------------------------------------------------------|-----------|-----------|----------|-------|----------------------|-------------------------------------------------|
| SPLIIFSDCNMENA VK                                        | 1779.8535 | 1779.8617 | 2        | 77.0  | Q9JLJ2               | 4-trimethylaminobutyraldehyde dehydrogenase     |
| GVKPITLGLGKSPLIIFSDCNMENA VK                             | 2972.5715 | 2972.5771 | 4        | 76.0  | Q9JLJ2               | 4-trimethylaminobutyraldehyde dehydrogenase     |
| GAGHPcYLDKPDEWHK + Carbamidomethyl (C)                   | 1908.8577 | 1908.8589 | 3        | 63.0  | Q8VCR7               | Protein ABHD14B                                 |
| VLVMEGAGHPcYLDKPDEWHK + Carbamidomethyl (C)              | 2480.1617 | 2480.1802 | +3;+4;+5 | 74.0  | Q8VCR7               | Protein ABHD14B                                 |
| FRCPEALF                                                 | 981.4742  | 981.4789  | 2        | 66.0  | P60710,P63260        | Actin, cytoplasmic 1,Actin, cytoplasmic 2       |
| QPSFLGMESCGIHETT FNSIMK                                  | 2456.1174 | 2456.119  | 3        | 58.0  | P60710,P63260        | Actin, cytoplasmic 1,Actin, cytoplasmic 2       |
| EKLcYVALDFEQEMATAASSSSLEK + Carbamidomethyl (C)          | 2806.3041 | 2806.3035 | 3        | 39.0  | P60710,P63260        | Actin, cytoplasmic 1,Actin, cytoplasmic 2       |
| cPEALFQPSFLGMESCGIHETT FNSIMK + Carbamidomethyl (C)      | 3173.433  | 3241.4602 | 3        | 94.0  | P60710,P63260        | Actin, cytoplasmic 1,Actin, cytoplasmic 2       |
| MGNHELYMR                                                | 1149.5059 | 1149.5053 | +2;+3    | 75.0  | P26043,P26041,P26040 | Radixin,Moesin,Ezrin                            |
| LCMGNHELYMR                                              | 1365.5992 | 1365.5984 | 3        | 64.0  | P26043,P26041,P26040 | Radixin,Moesin,Ezrin                            |
| LcMGNHELYMR + Carbamidomethyl (C)                        | 1422.6206 | 1422.6225 | 3        | 79.0  | P26043,P26041,P26040 | Radixin,Moesin,Ezrin                            |
| EAILNDEIYCPETAVLLASYAVQAK                                | 2820.4255 | 2820.4416 | +2;+3    | 82.0  | P26043               | Radixin                                         |
| LGDISIQPCPDVK                                            | 1482.7752 | 1482.7803 | 2        | 71.0  | Q01853               | Transitional endoplasmic reticulum ATPase       |
| MTNGFSGADLTEICQR                                         | 1741.7764 | 1741.7852 | 2        | 121.0 | Q01853               | Transitional endoplasmic reticulum ATPase       |
| VVETDPSYCI VAPDTVIHcEGEPIKR + Carbamidomethyl (C)        | 3091.4995 | 3091.498  | 3        | 32.0  | Q01853               | Transitional endoplasmic reticulum ATPase       |
| EGSSHNWQHITDQIGMFCFTGLKPEQVER                            | 3373.5608 | 3373.581  | +4;+5    | 72.0  | P05202               | Aspartate aminotransferase, mitochondrial       |
| EGSSHNWQHITDQIGMFCFTGLKPEQVER + Carbamidomethyl (C)      | 3430.5823 | 3430.5973 | 3        | 79.0  | P05202               | Aspartate aminotransferase, mitochondrial       |
| HGEVCPAGWKPGSDTIKPDV N                                   | 2206.0477 | 2206.053  | 3        | 47.0  | P35700               | Peroxisredoxin-1                                |
| HGEVCPAGWKPGSDTIKPDV NKS                                 | 2421.1747 | 2421.1837 | 4        | 30.0  | P35700               | Peroxisredoxin-1                                |
| LVQAFQFTDKHGEVCPAGWKPGSDTIKPDV NKS                       | 3511.7558 | 3511.7872 | +3;+4;+6 | 33.0  | P35700               | Peroxisredoxin-1                                |
| GEVITTYCPANNEPIAR                                        | 1846.8883 | 1846.8953 | 2        | 104.0 | Q9DBF1               | Alpha-aminoadipic semialdehyde dehydrogenase    |
| GSDCGIVNVNIPTSGAEIGGAF GGEK                              | 2448.1591 | 2448.1674 | 2        | 152.0 | Q9DBF1               | Alpha-aminoadipic semialdehyde dehydrogenase    |
| IKPTRPLGLFM EYENSPESTSEV ECGDFYNSGDR                     | 3866.7403 | 3866.7536 | 4        | 94.0  | Q91VA0               | Acyl-coenzyme A synthetase ACSM1, mitochondrial |
| AGALEGVPI SGCLGDQSAALV GQMcFQDGOAK + Carbamidomethyl (C) | 3245.5155 | 3245.5369 | 3        | 94.0  | Q64516               | Glycerol kinase                                 |

|                                                                     |           |           |       |       |        |                                                                          |
|---------------------------------------------------------------------|-----------|-----------|-------|-------|--------|--------------------------------------------------------------------------|
| LEAVSHTSDMHCGYGDSPSK                                                | 2119.8939 | 2119.8953 | +3;+4 | 100.0 | P40124 | Adenylyl cyclase-associated protein 1                                    |
| LEAVSHTSDMHcGYGDSPSK + Carbamidomethyl (C)                          | 2176.9154 | 2176.9328 | +3;+4 | 112.0 | P40124 | Adenylyl cyclase-associated protein 1                                    |
| SYCNDQSTGDIK                                                        | 1329.5507 | 1329.5432 | 2     | 78.0  | P00493 | Hypoxanthine-guanine phosphoribosyltransferase                           |
| EMGGHHIVALCVLK                                                      | 1505.7847 | 1505.787  | 3     | 46.0  | P00493 | Hypoxanthine-guanine phosphoribosyltransferase                           |
| TVVPCcSGPK + Carbamidomethyl (C)                                    | 1114.5151 | 1114.5155 | 2     | 76.0  | P28271 | Cytoplasmic aconitate hydratase                                          |
| WGSQAFcNMR                                                          | 1198.5012 | 1198.5045 | 2     | 64.0  | P28271 | Cytoplasmic aconitate hydratase                                          |
| INPVcPADLVIDHSIQVDFNR + Carbamidomethyl (C)                         | 2421.2111 | 2421.2128 | 3     | 95.0  | P28271 | Cytoplasmic aconitate hydratase                                          |
| ILATAVcHTDAYTLcSGADPEGC FPVILGHEGAGIVESVGEVTK + Carbamidomethyl (C) | 4508.188  | 4508.2053 | 4     | 41.0  | P28474 | Alcohol dehydrogenase class-3                                            |
| ILYPDEVACVcVPEVcK + Carbamidomethyl (C)                             | 1900.9315 | 1900.9539 | 2     | 47.0  | Q92317 | Sodium/glucose cotransporter 2                                           |
| SLLHcFQcCGAK + 2 Carbamidomethyl (C)                                | 1558.6731 | 1558.6791 | +2;+3 | 64.0  | O35488 | Very long-chain acyl-CoA synthetase                                      |
| IAVAAQNCYK                                                          | 1079.5433 | 1079.5435 | 2     | 94.0  | P17751 | Triosephosphate isomerase                                                |
| LGILGLcNLAIEGR + Carbamidomethyl (C)                                | 1598.8814 | 1598.8801 | 2     | 89.0  | P51660 | Peroxisomal multifunctional enzyme type 2                                |
| GTFASLSELHCDK                                                       | 1406.65   | 1406.6512 | +2;+3 | 88.0  | P02088 | Hemoglobin subunit beta-1                                                |
| GTFASLSELHcDK + Carbamidomethyl (C)                                 | 1463.6715 | 1463.6776 | +2;+3 | 77.0  | P02088 | Hemoglobin subunit beta-1                                                |
| KVITAFNDGLNHLDSLK                                                   | 1884.0105 | 1884.0235 | 3     | 62.0  | P02088 | Hemoglobin subunit beta-1                                                |
| HCQEFLGSSEVINWK                                                     | 1775.8301 | 1775.8409 | +2;+3 | 112.0 | Q9DCY0 | Glycine N-acyltransferase-like protein Keg1                              |
| HKQcFLYMCQTAK + Carbamidomethyl (C)                                 | 1823.8521 | 1823.8419 | 3     | 36.0  | Q9DCY0 | Glycine N-acyltransferase-like protein Keg1                              |
| cIMGPEGTPVSWTLMDHTGELR + Carbamidomethyl (C)                        | 2486.1393 | 2486.1404 | 3     | 92.0  | Q9DCY0 | Glycine N-acyltransferase-like protein Keg1                              |
| RILQLCMGNHELYMR                                                     | 1875.927  | 1875.9345 | 3     | 67.0  | P26040 | Ezrin                                                                    |
| KQCVcPFR                                                            | 876.464   | 876.4655  | 2     | 44.0  | Q9CPR4 | 60S ribosomal protein L17                                                |
| SPCHIEMILTEK                                                        | 1399.6839 | 1399.6856 | 3     | 85.0  | Q9CPR4 | 60S ribosomal protein L17                                                |
| INPYMSSPCHIEMILTEK                                                  | 2104.9995 | 2105.0013 | 3     | 70.0  | Q9CPR4 | 60S ribosomal protein L17                                                |
| INPYMSSPcCHIEMILTEK + Carbamidomethyl (C)                           | 2162.021  | 2162.027  | 3     | 83.0  | Q9CPR4 | 60S ribosomal protein L17                                                |
| VGSVLQEGCEK                                                         | 1147.5543 | 1147.5574 | 2     | 81.0  | Q8K2B3 | Succinate dehydrogenase [ubiquinone] flavoprotein subunit, mitochondrial |



|                                         |           |           |       |       |               |                                                                                       |
|-----------------------------------------|-----------|-----------|-------|-------|---------------|---------------------------------------------------------------------------------------|
| VGSVLQEGcEK + Carbamidomethyl (C)       | 1204.5758 | 1204.5751 | 2     | 46.0  | Q8K2B3        | Succinate dehydrogenase [ubiquinone] flavoprotein subunit, mitochondrial              |
| TLNEADCATVPPAIR                         | 1569.7821 | 1569.7958 | 2     | 91.0  | Q8K2B3        | Succinate dehydrogenase [ubiquinone] flavoprotein subunit, mitochondrial              |
| VGMKEYEMESLFQHYCYSR                     | 2399.0384 | 2399.0351 | 3     | 49.0  | Q11136        | Xaa-Pro dipeptidase                                                                   |
| FCLEGMEEGSEGLDELIFAQK                   | 2431.0923 | 2431.1055 | +2;+3 | 84.0  | Q9D1A2        | Cytosolic non-specific dipeptidase                                                    |
| AVLCPPPVKK                              | 1050.626  | 1050.6264 | 3     | 46.0  | P63001,P60764 | Ras-related C3 botulinum toxin substrate 1,Ras-related C3 botulinum toxin substrate 3 |
| WCQSMQDPSASLLER                         | 1749.7814 | 1749.7867 | 2     | 133.0 | Q9DC50        | Peroxisomal carnitine O-octanoyltransferase                                           |
| WcQSMQDPSASLLER + Carbamidomethyl (C)   | 1806.8029 | 1806.8115 | 2     | 120.0 | Q9DC50        | Peroxisomal carnitine O-octanoyltransferase                                           |
| SSGGFVWACK                              | 1040.475  | 1040.4761 | 2     | 104.0 | P54071        | Isocitrate dehydrogenase [NADP], mitochondrial                                        |
| DLAGcIHGLSNVK + Carbamidomethyl (C)     | 1382.6976 | 1382.704  | +2;+3 | 74.0  | P54071        | Isocitrate dehydrogenase [NADP], mitochondrial                                        |
| AHSNLCVNQIVR                            | 1352.6983 | 1352.701  | +2;+3 | 78.0  | Q9JH15        | Isovaleryl-CoA dehydrogenase, mitochondrial                                           |
| FASYCLTEPGSGSDAASLLTSK                  | 2275.0678 | 2275.0796 | 2     | 90.0  | Q9D7B6        | Isobutyryl-CoA dehydrogenase, mitochondrial                                           |
| KlcMQR + Carbamidomethyl (C)            | 834.4204  | 834.4196  | 2     | 32.0  | P62702        | 40S ribosomal protein S4, X isoform                                                   |
| FDTGNLCMVTGGANLGR                       | 1724.7974 | 1724.8082 | 2     | 149.0 | P62702        | 40S ribosomal protein S4, X isoform                                                   |
| FDTGNLcMVTGGANLGR + Carbamidomethyl (C) | 1781.8189 | 1781.8248 | +2;+3 | 153.0 | P62702        | 40S ribosomal protein S4, X isoform                                                   |
| LDASTQTTHelTIPNNLIGCIIG R               | 2579.3377 | 2579.342  | 3     | 36.0  | P60335        | Poly(rC)-binding protein 1                                                            |
| QLLCDLVGISR                             | 1215.6645 | 1215.6652 | 2     | 68.0  | Q99K67        | Alpha-aminoadipic semialdehyde synthase, mitochondrial                                |
| SSVVPVEGCPelPHK                         | 1576.7919 | 1576.8058 | 2     | 73.0  | Q99K67        | Alpha-aminoadipic semialdehyde synthase, mitochondrial                                |

|                                                             |           |           |       |       |        |                                                                    |
|-------------------------------------------------------------|-----------|-----------|-------|-------|--------|--------------------------------------------------------------------|
| ELGATVESYVSYCGGLPAPEHS<br>DNPLR                             | 2860.3338 | 2860.3235 | 3     | 103.0 | Q99K67 | Alpha-aminoadipic semialdehyde<br>synthase, mitochondrial          |
| NPVLCSWGK +<br>Carbamidomethyl (C)                          | 1059.5172 | 1059.5218 | 2     | 31.0  | Q9R0P3 | S-formylglutathione hydrolase                                      |
| APICNPVLCSWGK +<br>Carbamidomethyl (C)                      | 1511.7265 | 1511.7261 | 2     | 75.0  | Q9R0P3 | S-formylglutathione hydrolase                                      |
| SVSAFAPicNPVLCSWGK +<br>Carbamidomethyl (C)                 | 2002.9645 | 2002.9738 | 2     | 33.0  | Q9R0P3 | S-formylglutathione hydrolase                                      |
| AYHEQLTVAEITNACFEPANQ<br>MVK                                | 2706.2781 | 2706.2802 | +2;+3 | 102.0 | P68373 | Tubulin alpha-1C chain                                             |
| ECADLWPR                                                    | 988.4436  | 988.4449  | 2     | 73.0  | P62830 | 60S ribosomal protein L23                                          |
| TFSDIQDVQILCHFVR                                            | 1919.9564 | 1919.9618 | 3     | 105.0 | Q9D826 | Peroxisomal sarcosine oxidase                                      |
| GTFDVECLTTDHYTGGMK                                          | 1973.8499 | 1973.8514 | 3     | 81.0  | Q61147 | Ceruloplasmin                                                      |
| ADDKVLPQQYVYVLHANEPS<br>PGEQDNCVTR                          | 3457.6208 | 3457.6468 | 3     | 45.0  | Q61147 | Ceruloplasmin                                                      |
| DHENCISGEDITHNGIVYTPK +<br>Carbamidomethyl (C)              | 2398.0859 | 2398.0984 | 3     | 83.0  | Q61838 | Pregnancy zone protein                                             |
| SSEDKQEMLQTEGSQCAK                                          | 1997.867  | 1997.876  | +2;+3 | 114.0 | Q8BVE3 | V-type proton ATPase subunit H                                     |
| SSEDKQEMLQTEGSQcAK +<br>Carbamidomethyl (C)                 | 2054.8885 | 2054.8844 | 3     | 93.0  | Q8BVE3 | V-type proton ATPase subunit H                                     |
| VGQPGAAGPVSPMCPGR                                           | 1579.7599 | 1579.7605 | 2     | 91.0  | P29699 | Alpha-2-HS-glycoprotein                                            |
| ANLMHNLGGEEVSVACK                                           | 1770.8393 | 1770.8488 | +2;+3 | 105.0 | P29699 | Alpha-2-HS-glycoprotein                                            |
| QLTEHAVEGDCDFHILK                                           | 1953.9255 | 1953.9304 | +3;+4 | 54.0  | P29699 | Alpha-2-HS-glycoprotein                                            |
| GEGMSQAATicR +<br>Carbamidomethyl (C)                       | 1279.5649 | 1279.5597 | 2     | 99.0  | P35505 | Fumarylacetoacetase                                                |
| DVMICPDTSLLEDAK                                             | 1535.6847 | 1535.6887 | 2     | 70.0  | Q99LX0 | Protein deglycase DJ-1                                             |
| DGTAHPAMCLQNLDMLENA<br>GLPDMK                               | 2684.2066 | 2684.2098 | +2;+3 | 121.0 | Q91WG0 | Acylcarnitine hydrolase                                            |
| TcAEAVVPSYVPIVKK +<br>Carbamidomethyl (C)                   | 1759.9542 | 1759.9539 | 3     | 63.0  | P36552 | Oxygen-dependent coproporphyrinogen-<br>III oxidase, mitochondrial |
| STGPHAASCFGAK                                               | 1232.5608 | 1232.5585 | +2;+3 | 60.0  | P30999 | Catenin delta-1                                                    |
| ACLYAGVK                                                    | 823.4262  | 823.4257  | 2     | 63.0  | P15105 | Glutamine synthetase                                               |
| cIEEAIDK +<br>Carbamidomethyl (C)                           | 976.4535  | 976.4552  | 2     | 58.0  | P15105 | Glutamine synthetase                                               |
| TCLLNETGDPEPFQYKN                                           | 1870.8407 | 1870.8457 | 2     | 75.0  | P15105 | Glutamine synthetase                                               |
| ESKPYPEDPSCTMTEFHSTPK                                       | 2410.0457 | 2410.0506 | 3     | 139.0 | P97449 | Aminopeptidase N                                                   |
| KAQCPIVER                                                   | 1042.5593 | 1042.5283 | 2     | 41.0  | P97461 | 40S ribosomal protein S5                                           |
| LLYEcNPIAYVMEK +<br>Carbamidomethyl (C)                     | 1741.8419 | 1741.8461 | 2     | 95.0  | Q9QXD6 | Fructose-1,6-bisphosphatase 1                                      |
| QAQVNLTVVDKPPDPPAGTPC<br>ASDIR                              | 2591.3014 | 2591.3101 | 3     | 93.0  | Q6PDN3 | Myosin light chain kinase, smooth muscle                           |
| GGWHSLcIQEVFPEDTGTYTE<br>AWNSAGEVR +<br>Carbamidomethyl (C) | 3566.5507 | 3566.5543 | 3     | 90.0  | Q6PDN3 | Myosin light chain kinase, smooth muscle                           |
| MADEAVCVGPAPTSK                                             | 1474.6796 | 1474.6856 | 2     | 147.0 | Q91ZA3 | Propionyl-CoA carboxylase alpha chain,<br>mitochondrial            |

|                                                              |           |           |          |       |               |                                                                                                                     |
|--------------------------------------------------------------|-----------|-----------|----------|-------|---------------|---------------------------------------------------------------------------------------------------------------------|
| FGIEAFSDCLR                                                  | 1256.586  | 1256.5884 | 2        | 94.0  | Q80XN0        | D-beta-hydroxybutyrate dehydrogenase, mitochondrial                                                                 |
| AQLNIGNVLPVGTMPGEGTIVC<br>CLEEKPGDR +<br>Carbamidomethyl (C) | 3209.5883 | 3209.6053 | 3        | 129.0 | P62918        | 60S ribosomal protein L8                                                                                            |
| AQLNIGNVLPVGTMPGEGTIVC<br>cLEEKPGDR +<br>Carbamidomethyl (C) | 3277.6145 | 3277.6294 | 3        | 103.0 | P62918        | 60S ribosomal protein L8                                                                                            |
| VDEFPLCGHMVSDEYEQLSSE<br>ALEAAR                              | 3024.3481 | 3024.3556 | 3        | 77.0  | Q6ZWW3,P86048 | 60S ribosomal protein L10,60S ribosomal protein L10-like                                                            |
| WDTCAPEVILHAVGGK                                             | 1694.845  | 1694.8472 | +2;+3    | 66.0  | Q9Z0S1        | 3'(2'),5'-bisphosphate nucleotidase 1                                                                               |
| SHSNQLVTDICISAMNPDTVLR                                       | 2300.0889 | 2300.1009 | 3        | 67.0  | Q9Z0S1        | 3'(2'),5'-bisphosphate nucleotidase 1                                                                               |
| SFNRNEC                                                      | 868.3497  | 868.3477  | 2        | 31.0  | P01837        | Ig kappa chain C region                                                                                             |
| LVVPASQCGLIGK                                                | 1370.7592 | 1370.7617 | 2        | 86.0  | Q61990,P57722 | Poly(rC)-binding protein 2,Poly(rC)-binding protein 3                                                               |
| AQAcQDAGVR +<br>Carbamidomethyl (C)                          | 1074.4876 | 1074.4873 | 2        | 43.0  | Q05920        | Pyruvate carboxylase, mitochondrial                                                                                 |
| FLYEcPWR +<br>Carbamidomethyl (C)                            | 1169.5328 | 1169.5341 | 2        | 33.0  | Q05920        | Pyruvate carboxylase, mitochondrial                                                                                 |
| ADFAQACQDAGVR                                                | 1350.5986 | 1350.604  | 2        | 111.0 | Q05920        | Pyruvate carboxylase, mitochondrial                                                                                 |
| LKEAQNTCAMLTTFNEVDMS<br>NIQEMR                               | 3016.3762 | 3016.3903 | 3        | 75.0  | Q9D2G2        | Dihydropyridoxyllysine-residue succinyltransferase component of 2-oxoglutarate dehydrogenase complex, mitochondrial |
| LKEAQNTcAMLTTFNEVDMS<br>NIQEMR + Carbamidomethyl (C)         | 3073.3977 | 3073.4101 | 3        | 147.0 | Q9D2G2        | Dihydropyridoxyllysine-residue succinyltransferase component of 2-oxoglutarate dehydrogenase complex, mitochondrial |
| GFEVVMTEPIDEYCVQQLK                                          | 2390.1174 | 2390.1301 | +2;+3    | 91.0  | P11499        | Heat shock protein HSP 90-beta                                                                                      |
| LVSSPcCIVTSTYGTANMER<br>+ Carbamidomethyl (C)                | 2442.1018 | 2442.1028 | 2        | 125.0 | P11499        | Heat shock protein HSP 90-beta                                                                                      |
| ICYEHR                                                       | 819.3697  | 819.368   | 2        | 48.0  | O88844        | Isocitrate dehydrogenase [NADP] cytoplasmic                                                                         |
| HLLPLVQCPTL                                                  | 1232.6951 | 1232.7018 | 2        | 54.0  | Q8R164        | Valacyclovir hydrolase                                                                                              |
| TcEDWVDGISQFK +<br>Carbamidomethyl (C)                       | 1583.6926 | 1583.6962 | 2        | 58.0  | Q8R164        | Valacyclovir hydrolase                                                                                              |
| HFRDEELSCSVLELK                                              | 1803.8825 | 1803.8876 | +2;+3;+4 | 90.0  | Q03734,P07759 | Serine protease inhibitor A3M,Serine protease inhibitor A3K                                                         |

|                                              |           |           |       |       |                                 |                                                                                                       |
|----------------------------------------------|-----------|-----------|-------|-------|---------------------------------|-------------------------------------------------------------------------------------------------------|
| FAKLCEEHGIIIR                                | 1414.7391 | 1414.7057 | +2;+3 | 101.0 | P04939                          | Major urinary protein 3                                                                               |
| FAQLCEEHGILR                                 | 1414.7027 | 1414.7057 | +2;+3 | 101.0 | A2BIM8,B5X0G2,<br>P02762,P04938 | Major urinary protein 18, Major urinary protein 17, Major urinary protein 6, Major urinary protein 11 |
| FAKLCEEHGILR                                 | 1414.7391 | 1414.7057 | +2;+3 | 101.0 | P11589                          | Major urinary protein 2                                                                               |
| FcETTIGcKDPAQGLLK + 2 Carbamidomethyl (C)    | 2133.0235 | 2133.0402 | +2;+3 | 77.0  | P13707                          | Glycerol-3-phosphate dehydrogenase [NAD(+)], cytoplasmic                                              |
| LPciYLVDSGGANLPR + Carbamidomethyl (C)       | 1743.8978 | 1743.9033 | 2     | 70.0  | Q3ULD5                          | Methylcrotonoyl-CoA carboxylase beta chain, mitochondrial                                             |
| VTDKLPIHDHIFCCR                              | 1896.9339 | 1896.935  | +4;+5 | 48.0  | Q60692                          | Proteasome subunit beta type-6                                                                        |
| EGMTKDEcLQFTANALALAMER + Carbamidomethyl (C) | 2498.1603 | 2498.1606 | 3     | 106.0 | Q60692                          | Proteasome subunit beta type-6                                                                        |
| ILCGEGVDQLSLPLR                              | 1611.8654 | 1611.8758 | 2     | 130.0 | Q8BH00                          | Aldehyde dehydrogenase family 8 member A1                                                             |
| NINNDTTYCIKK                                 | 1425.6922 | 1425.6973 | +2;+3 | 75.0  | Q99KR3                          | Endoribonuclease LACTB2                                                                               |
| VLGCNPGPMTLQGTNTYLVGTGSR                     | 2435.1937 | 2435.2138 | 2     | 136.0 | Q99KR3                          | Endoribonuclease LACTB2                                                                               |
| EAALNDKPKPGMNGAVEPCAQPR                      | 2449.1842 | 2449.1881 | 3     | 55.0  | Q9JIL4                          | Na(+)/H(+) exchange regulatory cofactor NHE-RF3                                                       |
| GLCGTVLIHK                                   | 1039.5848 | 1039.5898 | +2;+3 | 46.0  | Q8VC30                          | Triokinase/FMN cyclase                                                                                |
| ICTTLIGLEEHLNALDR                            | 1909.9931 | 1910.0025 | 3     | 101.0 | Q8VC30                          | Triokinase/FMN cyclase                                                                                |
| KMVNSVEGCADDALAGLVASNPDLQLLQGHR              | 3220.5969 | 3220.6097 | 4     | 33.0  | Q8VC30                          | Triokinase/FMN cyclase                                                                                |
| MGAQSVYHLHIHVLGGR                            | 1873.9734 | 1873.9771 | 4     | 73.0  | Q9D0S9                          | Histidine triad nucleotide-binding protein 2, mitochondrial                                           |
| LENCGITAANcKDLcDV + 2 Carbamidomethyl (C)    | 1894.8223 | 1894.881  | 2     | 30.0  | Q91VI7                          | Ribonuclease inhibitor                                                                                |
| LQVTASPSLcGLR + Carbamidomethyl (C)          | 1528.8032 | 1528.8104 | 2     | 101.0 | P28665,P28666                   | Murinoglobulin-1, Murinoglobulin-2                                                                    |
| VLIVEPEGIKQEHTFSSLFCASDAEISEK                | 3205.5853 | 3205.594  | +3;+4 | 54.0  | P28665                          | Murinoglobulin-1                                                                                      |
| ILGLGDLGcNGMGIPVGK + Carbamidomethyl (C)     | 1769.9168 | 1769.9236 | 2     | 73.0  | P06801                          | NADP-dependent malic enzyme                                                                           |
| YGMNLIQFEDFANR                               | 1819.8022 | 1819.8091 | 2     | 55.0  | P06801                          | NADP-dependent malic enzyme                                                                           |
| GQCYELDETAVRPGYPK                            | 2087.9622 | 2087.9758 | +2;+3 | 118.0 | P29788                          | Vitronectin                                                                                           |
| EVAENCKDIK                                   | 1147.5543 | 1147.5519 | 2     | 62.0  | Q9D6R2                          | Isocitrate dehydrogenase [NAD] subunit alpha, mitochondrial                                           |
| SGTGQQLGQAAEESNCcAR + Carbamidomethyl (C)    | 1965.8269 | 1965.8265 | 2     | 79.0  | Q9JIZ9                          | Phospholipid scramblase 3                                                                             |
| GLYDGPVCEVSVTPK                              | 1562.7651 | 1562.7693 | 2     | 98.0  | O08553                          | Dihydropyrimidinase-related protein 2                                                                 |

|                                                  |           |           |       |       |                      |                                                                                                            |
|--------------------------------------------------|-----------|-----------|-------|-------|----------------------|------------------------------------------------------------------------------------------------------------|
| McDHLIR + Carbamidomethyl (C)                    | 943.4368  | 943.4348  | 3     | 35.0  | Q9ESE1               | Lipopolysaccharide-responsive and beige-like anchor protein                                                |
| KGDEETGpCSSLVPEGTGATR + Carbamidomethyl (C)      | 2234.0121 | 2234.0159 | 3     | 78.0  | Q9ESE1               | Lipopolysaccharide-responsive and beige-like anchor protein                                                |
| CVGVFQHGK                                        | 973.4804  | 973.4799  | +2;+3 | 58.0  | P63017,P16627,Q61696 | Heat shock cognate 71 kDa protein,Heat shock 70 kDa protein 1-like,Heat shock 70 kDa protein 1A            |
| TTPSYVAFTDTER                                    | 1486.694  | 1486.7016 | 2     | 52.0  | P63017,P16627,Q61696 | Heat shock cognate 71 kDa protein,Heat shock 70 kDa protein 1-like,Heat shock 70 kDa protein 1A            |
| CKELGITALHIK                                     | 1324.7537 | 1324.7547 | 3     | 78.0  | P62264               | 40S ribosomal protein S14                                                                                  |
| IPHFGYCDEIDLTQLVK                                | 1989.987  | 1989.9932 | +2;+3 | 72.0  | P53395               | Lipoamide acyltransferase component of branched-chain alpha-keto acid dehydrogenase complex, mitochondrial |
| TMSAALKIPHFGYCDEIDLTQLVK                         | 2692.3604 | 2692.3566 | 4     | 39.0  | P53395               | Lipoamide acyltransferase component of branched-chain alpha-keto acid dehydrogenase complex, mitochondrial |
| SINTEVVAcSVDSQFTHLAWIN TPR + Carbamidomethyl (C) | 2844.3865 | 2844.3967 | 3     | 151.0 | O08807               | Peroxisomal acyl-CoA oxidase 4                                                                             |
| TTIQGQEINAPICISPTAFHSIA WADGEK                   | 3097.5179 | 3097.5268 | 3     | 149.0 | Q9NYQ2               | Hydroxyacid oxidase 2                                                                                      |
| NCGQMSEIEAK                                      | 1208.5165 | 1208.5143 | 2     | 64.0  | P26039               | Talin-1                                                                                                    |
| HTSALcNSCR + Carbamidomethyl (C)                 | 1215.5125 | 1215.5088 | 2     | 61.0  | P26039               | Talin-1                                                                                                    |
| IPICPVFR                                         | 943.5313  | 943.5282  | 2     | 53.0  | Q9Z2J0               | Solute carrier family 23 member 1                                                                          |
| IPTACITVEDAEMMSR                                 | 1765.8049 | 1765.8075 | 2     | 131.0 | Q9WVJ3               | Carboxypeptidase Q                                                                                         |
| KCPSTHSEELR                                      | 1285.6085 | 1285.6051 | 3     | 44.0  | O09172               | Glutamate--cysteine ligase regulatory subunit                                                              |
| EFPDVLEcTMSHAVEK + Carbamidomethyl (C)           | 1890.8492 | 1890.8557 | 2     | 94.0  | O09172               | Glutamate--cysteine ligase regulatory subunit                                                              |
| TNVcGMIQGTR + Carbamidomethyl (C)                | 1235.5751 | 1235.5774 | 2     | 54.0  | P28825               | Meprin A subunit alpha                                                                                     |
| HcNMVLENVK                                       | 1185.5634 | 1185.5627 | 2     | 49.0  | P62317               | Small nuclear ribonucleoprotein Sm D2                                                                      |
| HcNMVLENVK + Carbamidomethyl (C)                 | 1242.5849 | 1242.5872 | 2     | 94.0  | P62317               | Small nuclear ribonucleoprotein Sm D2                                                                      |

|                                                        |           |           |       |       |                             |                                                                                     |
|--------------------------------------------------------|-----------|-----------|-------|-------|-----------------------------|-------------------------------------------------------------------------------------|
| LPACVVDcGTGYTK + Carbamidomethyl (C)                   | 1550.7109 | 1550.7109 | 2     | 105.0 | Q99JY9                      | Actin-related protein 3                                                             |
| MSYTLQHLPMpCAWNQWK + Carbamidomethyl (C)               | 2290.0486 | 2290.0598 | 3     | 87.0  | Q91XE0                      | Glycine N-acyltransferase                                                           |
| NFPSSCVLGPETGPASWTLMDQTGEMR                            | 2910.2987 | 2910.312  | 3     | 111.0 | Q91XE0                      | Glycine N-acyltransferase                                                           |
| IQFHNVKPECLDAYNSLTEAVL PK                              | 2728.3894 | 2728.401  | +3;+4 | 129.0 | O55125                      | Protein NipSnap homolog 1                                                           |
| LHLDEDPcSLVGNWNTWYGEQDQAVHLWR + Carbamidomethyl (C)    | 3700.6794 | 3700.7121 | 4     | 39.0  | O55125                      | Protein NipSnap homolog 1                                                           |
| VDVHFcGVNFADILACRG + Carbamidomethyl (C)               | 2059.9608 | 2059.9615 | 3     | 64.0  | Q3UNZ8                      | Quinone oxidoreductase-like protein 2                                               |
| RPNKPLFTGLVTQCQK                                       | 1828.9982 | 1829.0011 | 3     | 101.0 | Q8K4Z3                      | NAD(P)H-hydrate epimerase                                                           |
| YQLNLPSPDTECVYR                                        | 1959.9036 | 1959.9246 | 2     | 89.0  | Q8K4Z3                      | NAD(P)H-hydrate epimerase                                                           |
| EGLLLWCQR                                              | 1116.575  | 1116.574  | 2     | 82.0  | P57780,Q7TPR4,O88990,Q9J191 | Alpha-actinin-4,Alpha-actinin-1,Alpha-actinin-3,Alpha-actinin-2                     |
| ICDQWDNLGSLTHSR                                        | 1743.7999 | 1743.8069 | 3     | 74.0  | P57780                      | Alpha-actinin-4                                                                     |
| IcDQWDNLGSLTHSR + Carbamidomethyl (C)                  | 1800.8213 | 1800.8272 | 3     | 59.0  | P57780                      | Alpha-actinin-4                                                                     |
| LCDVLAQAGHR                                            | 1181.5975 | 1181.5975 | 2     | 93.0  | Q8R086                      | Sulfite oxidase, mitochondrial                                                      |
| TCTTVAFTQVNSDKGALAK                                    | 2083.0256 | 2083.0418 | +2;+3 | 124.0 | P12970                      | 60S ribosomal protein L7a                                                           |
| MLSLAEQQLVDCAQAFNNHGCK                                 | 2419.1082 | 2419.1119 | 3     | 134.0 | P49935                      | Pro-cathepsin H                                                                     |
| SGGASEPLPHQPSLETQLYCGQAEGGSEGPSTSGTLK                  | 3769.7741 | 3769.813  | 3     | 128.0 | P04919                      | Band 3 anion transport protein                                                      |
| VCALMScAK + Carbamidomethyl (C)                        | 1049.4708 | 1049.4727 | 2     | 41.0  | P45376                      | Aldose reductase                                                                    |
| HIDCAQVYQNEK                                           | 1446.6561 | 1446.6599 | 2     | 80.0  | P45376                      | Aldose reductase                                                                    |
| AEPSALGGGGSPGAcPALGAK + Carbamidomethyl (C)            | 1880.9051 | 1880.9168 | 2     | 125.0 | Q9ES97                      | Reticulon-3                                                                         |
| AEWcQIFDGTDAcVTPVLTfEEALHHQHNR + 2 Carbamidomethyl (C) | 3648.6515 | 3648.6658 | +4;+5 | 66.0  | O09174                      | Alpha-methylacyl-CoA racemase                                                       |
| TKAEWcQIFDGTDAcVTPVLTfEEALHHQHNR + Carbamidomethyl (C) | 3820.7726 | 3820.7935 | 5     | 60.0  | O09174                      | Alpha-methylacyl-CoA racemase                                                       |
| NANcSIEESFQR + Carbamidomethyl (C)                     | 1453.6256 | 1453.6257 | 2     | 79.0  | P38060                      | Hydroxymethylglutaryl-CoA lyase, mitochondrial                                      |
| KNANcSIEESFQR                                          | 1524.6991 | 1524.7008 | +2;+3 | 73.0  | P38060                      | Hydroxymethylglutaryl-CoA lyase, mitochondrial                                      |
| SCAEFVSGSQLR                                           | 1282.5976 | 1282.6024 | 2     | 90.0  | Q9DCX2                      | ATP synthase subunit d, mitochondrial                                               |
| ScAEFVSGSQLR + Carbamidomethyl (C)                     | 1339.619  | 1339.6203 | 2     | 76.0  | Q9DCX2                      | ATP synthase subunit d, mitochondrial                                               |
| GcALQCAILSPAFK + Carbamidomethyl (C)                   | 1545.7683 | 1545.7531 | 2     | 49.0  | P48722,Q61316,Q61699        | Heat shock 70 kDa protein 4L,Heat shock 70 kDa protein 4,Heat shock protein 105 kDa |
| KYEDICPSTHNMDVPNIK                                     | 2102.9765 | 2102.9829 | 3     | 80.0  | Q8BGY2                      | Eukaryotic translation initiation factor 5A-2                                       |

|                                               |           |           |   |       |               |                                                                                             |
|-----------------------------------------------|-----------|-----------|---|-------|---------------|---------------------------------------------------------------------------------------------|
| KYEDicPSTHNMDVFNK + Carbamidomethyl (C)       | 2159.998  | 2159.9985 | 3 | 103.0 | Q8BGY2,P63242 | Eukaryotic translation initiation factor 5A-2,Eukaryotic translation initiation factor 5A-1 |
| WNSPAEEGLSDCEVFPK                             | 1906.8407 | 1906.8548 | 2 | 117.0 | Q61316        | Heat shock 70 kDa protein 4                                                                 |
| GGNAVVDGcSK + Carbamidomethyl (C)             | 1062.4764 | 1062.478  | 2 | 48.0  | P97494        | Glutamate--cysteine ligase catalytic subunit                                                |
| NRQPPDSGPMCDLLWSDPQPQNGR                      | 2707.2231 | 2707.227  | 3 | 81.0  | Q60676        | Serine/threonine-protein phosphatase 5                                                      |
| KCGLQGFQDQIV                                  | 1135.5696 | 1135.5687 | 2 | 51.0  | P97328        | Ketohexokinase                                                                              |
| WAGPLCLQEVEPPQHALR                            | 2158.0629 | 2158.0665 | 3 | 105.0 | P70296        | Phosphatidylethanolamine-binding protein 1                                                  |
| YNLGAPVAGTcYQAEWDDYV PK + Carbamidomethyl (C) | 2516.1318 | 2516.1522 | 2 | 46.0  | P70296        | Phosphatidylethanolamine-binding protein 1                                                  |
| NNPAIVVIGNNGQINYDHQNDGATQALASCQR              | 3394.6072 | 3394.63   | 3 | 110.0 | Q9D0F3        | Protein ERGIC-53                                                                            |
| GLCAIAQAESLR                                  | 1230.639  | 1230.639  | 2 | 76.0  | P62908        | 40S ribosomal protein S3                                                                    |
| VGEGPGVCWLAPEQTAGK                            | 1797.872  | 1797.8787 | 2 | 110.0 | Q8VCT3        | Aminopeptidase B                                                                            |
| FRCPEAIF                                      | 981.4742  | 981.4789  | 2 | 66.0  | Q8BFZ3        | Beta-actin-like protein 2                                                                   |
| cGPASVQAVK + Carbamidomethyl (C)              | 1015.5121 | 1015.5095 | 2 | 94.0  | Q8BH61        | Coagulation factor XIII A chain                                                             |
| GLGDCLVK                                      | 803.4211  | 803.4228  | 2 | 47.0  | P51881        | ADP/ATP translocase 2                                                                       |
| TGTLDCWR                                      | 950.428   | 950.428   | 2 | 55.0  | P51881,P48962 | ADP/ATP translocase 2,ADP/ATP translocase 1                                                 |
| GQMEAIPCVVGDEEVWTSDIQYQLSPFNHAHK              | 3627.6763 | 3627.6723 | 4 | 94.0  | Q8CHT0        | Delta-1-pyrroline-5-carboxylate dehydrogenase, mitochondrial                                |
| IPIFSAAGLPHNEIAAQICR                          | 2120.12   | 2120.1276 | 3 | 100.0 | P62814        | V-type proton ATPase subunit B, brain isoform                                               |
| GELLGCFGLTEPNHGSDPGGMETR                      | 2473.1002 | 2473.1022 | 3 | 68.0  | Q60759        | Glutaryl-CoA dehydrogenase, mitochondrial                                                   |
| TVTHAVVLAHLICLGAR + Carbamidomethyl (C)       | 1898.056  | 1898.0337 | 3 | 45.0  | Q9QXD1        | Peroxisomal acyl-coenzyme A oxidase 2                                                       |
| YEASFPFLSLCGR                                 | 1488.7071 | 1488.7096 | 2 | 82.0  | Q8VE95        | UPF0598 protein C8orf82 homolog                                                             |
| LSYCGGGEALAIPEPAR                             | 1849.9032 | 1849.9142 | 2 | 49.0  | Q8VE95        | UPF0598 protein C8orf82 homolog                                                             |
| VYAAEPSNADDCYQSK                              | 1759.7359 | 1759.7399 | 2 | 106.0 | Q9QZX7        | Serine racemase                                                                             |
| cVLTTPDPTGIIDRK + Carbamidomethyl (C)         | 1801.9244 | 1801.9255 | 3 | 86.0  | Q922Q1        | Mitochondrial amidoxime reducing component 2                                                |
| GVVLGGCGDK                                    | 903.4484  | 903.4461  | 2 | 70.0  | P61922        | 4-aminobutyrate aminotransferase, mitochondrial                                             |
| TMGCLATTHSK                                   | 1148.5318 | 1148.5286 | 3 | 79.0  | P61922        | 4-aminobutyrate aminotransferase, mitochondrial                                             |
| QLNTIQNAEAVHFFCNYESR                          | 2512.1441 | 2512.1527 | 3 | 63.0  | P61922        | 4-aminobutyrate aminotransferase, mitochondrial                                             |

|                                              |           |           |       |       |                                    |                                                                                                                                                                                                                                                                                       |
|----------------------------------------------|-----------|-----------|-------|-------|------------------------------------|---------------------------------------------------------------------------------------------------------------------------------------------------------------------------------------------------------------------------------------------------------------------------------------|
| VLPMTGVEAGETAcK + Carbamidomethyl (C)        | 1675.7909 | 1675.8012 | 2     | 102.0 | P29758                             | Ornithine aminotransferase, mitochondrial                                                                                                                                                                                                                                             |
| QQTPPGLCPLAGNSVHADKK                         | 2060.0473 | 2060.0477 | 4     | 47.0  | Q9D8S4                             | Oligoribonuclease, mitochondrial                                                                                                                                                                                                                                                      |
| IAFScPQK + Carbamidomethyl (C)               | 949.4691  | 949.4705  | 2     | 42.0  | Q9CPV4                             | Glyoxalase domain-containing protein 4                                                                                                                                                                                                                                                |
| ALLGYADNQCK                                  | 1194.5703 | 1194.5715 | 2     | 78.0  | Q9CPV4                             | Glyoxalase domain-containing protein 4                                                                                                                                                                                                                                                |
| PGWSCLVTGAGGFLGQR                            | 1704.8406 | 1704.8562 | 2     | 87.0  | Q61767,Q61694,P26150,P26149,O35469 | 3 beta-hydroxysteroid dehydrogenase type 4,3 beta-hydroxysteroid dehydrogenase type 5,3 beta-hydroxysteroid dehydrogenase/Delta 5->4-isomerase type 3,3 beta-hydroxysteroid dehydrogenase/Delta 5->4-isomerase type 2,3 beta-hydroxysteroid dehydrogenase/Delta 5->4-isomerase type 6 |
| YLAEVACGDDR                                  | 1210.5288 | 1210.5368 | 2     | 89.0  | P68254                             | 14-3-3 protein theta                                                                                                                                                                                                                                                                  |
| YLAEVACGDDRK                                 | 1338.6238 | 1338.6225 | 3     | 64.0  | P68254                             | 14-3-3 protein theta                                                                                                                                                                                                                                                                  |
| HLCTPRQDYGVVVSQVSEDPD LANR                   | 2726.3082 | 2726.3283 | +3;+4 | 117.0 | O88338                             | Cadherin-16                                                                                                                                                                                                                                                                           |
| LQFHNVKPECLDAYNK                             | 1917.9407 | 1917.9404 | +2;+3 | 78.0  | O55126                             | Protein NipSnap homolog 2                                                                                                                                                                                                                                                             |
| VGEVcHITCKPEYAYGAAGSPK + Carbamidomethyl (C) | 2433.1457 | 2433.1467 | 4     | 46.0  | P30416                             | Peptidyl-prolyl cis-trans isomerase FKBP4                                                                                                                                                                                                                                             |
| YGYEIPVDMLCK                                 | 1429.6621 | 1429.6603 | 2     | 55.0  | Q9QUM9                             | Proteasome subunit alpha type-6                                                                                                                                                                                                                                                       |
| ITESIGcVMTGMTADSR + Carbamidomethyl (C)      | 1827.8165 | 1827.8217 | 2     | 49.0  | Q9QUM9                             | Proteasome subunit alpha type-6                                                                                                                                                                                                                                                       |
| SSILLDVKPWDEETDMTKLEE CVR                    | 2821.3514 | 2821.3595 | 3     | 98.0  | O70251                             | Elongation factor 1-beta                                                                                                                                                                                                                                                              |
| HPLGcTGAR + Carbamidomethyl (C)              | 967.4658  | 967.4663  | 2     | 40.0  | Q921H8,Q8VCHO                      | 3-ketoacyl-CoA thiolase A, peroxisomal,3-ketoacyl-CoA thiolase B, peroxisomal                                                                                                                                                                                                         |
| VNPLGGAIALGHPLGCTGAR                         | 1872.9992 | 1873.0023 | 3     | 79.0  | Q921H8,Q8VCHO                      | 3-ketoacyl-CoA thiolase A, peroxisomal,3-ketoacyl-CoA thiolase B, peroxisomal                                                                                                                                                                                                         |
| MAHAMNEYPDSCAVLVR                            | 1905.8535 | 1905.8636 | 3     | 59.0  | Q9WVQ5                             | Methylthioribulose-1-phosphate dehydratase                                                                                                                                                                                                                                            |



|                                                 |           |           |       |       |               |                                                                                                                 |
|-------------------------------------------------|-----------|-----------|-------|-------|---------------|-----------------------------------------------------------------------------------------------------------------|
| MAHAMNEYPDScaVLVR + Carbamidomethyl (C)         | 1962.875  | 1962.8782 | 3     | 68.0  | Q9WVQ5        | Methylthioribulose-1-phosphate dehydratase                                                                      |
| EIYTHFTCATDTK                                   | 1528.6868 | 1528.6869 | +2;+3 | 80.0  | P08752,B2RSH2 | Guanine nucleotide-binding protein G(i) subunit alpha-2,Guanine nucleotide-binding protein G(i) subunit alpha-1 |
| VIPAFMCQAGDFTNHNGTGG R                          | 2191.9892 | 2192.0013 | 3     | 126.0 | Q99KR7        | Peptidyl-prolyl cis-trans isomerase F, mitochondrial                                                            |
| LSPTNCDASEPLAEK                                 | 1573.7294 | 1573.7311 | 2     | 96.0  | Q9ESB3        | Histidine-rich glycoprotein                                                                                     |
| YcVGDEVSMADVCLVPQVAN AER + Carbamidomethyl (C)  | 2592.1658 | 2592.1522 | 2     | 94.0  | Q9WVL0        | Maleylacetoacetate isomerase                                                                                    |
| LKSDGALVDCGTSAQK                                | 1591.7876 | 1591.7864 | 3     | 57.0  | Q64105        | Sepiapterin reductase                                                                                           |
| TVVNISSLcALQPYKGWGLYCA GK + Carbamidomethyl (C) | 2695.3502 | 2695.3814 | 3     | 83.0  | Q64105        | Sepiapterin reductase                                                                                           |
| GAVTQcYR + Carbamidomethyl (C)                  | 953.4389  | 953.4305  | 2     | 31.0  | P62717        | 60S ribosomal protein L18a                                                                                      |
| KTSDFNFLAQEGCTR                                 | 1816.8414 | 1816.8479 | 2     | 93.0  | Q9D1P4        | Cysteine and histidine-rich domain-containing protein 1                                                         |
| FCSEYRPK                                        | 1028.4749 | 1028.4738 | 3     | 53.0  | P63158        | High mobility group protein B1                                                                                  |
| FcSEYRPK + Carbamidomethyl (C)                  | 1085.4964 | 1085.4973 | +2;+3 | 43.0  | P63158        | High mobility group protein B1                                                                                  |
| SSEEASCYR                                       | 1030.4025 | 1030.3999 | 2     | 84.0  | P0C8K7        | Small integral membrane protein 1                                                                               |
| MSSSEASCYR                                      | 1248.4751 | 1248.4709 | 2     | 37.0  | P0C8K7        | Small integral membrane protein 1                                                                               |
| ATQRPPYCDGTHK                                   | 1472.683  | 1472.6835 | 3     | 44.0  | B1AR13        | CDGSH iron-sulfur domain-containing protein 3, mitochondrial                                                    |
| GPVCLLAGGEPTVQLQGSGK                            | 1909.9932 | 1909.9894 | 2     | 89.0  | Q8QZY2        | Glycerate kinase                                                                                                |
| TKENVNATENCISAVGK                               | 1776.8676 | 1776.8688 | 3     | 89.0  | Q8BKC5        | Importin-5                                                                                                      |
| QSPDGTCSLPSAR                                   | 1317.5983 | 1317.6006 | 2     | 88.0  | Q8C129        | Leucyl-cystinyl aminopeptidase                                                                                  |
| GYEVIYLTEPVDEYCIQALPEFD GKR                     | 3046.4634 | 3046.4743 | 3     | 88.0  | P08113        | Endoplasmin                                                                                                     |
| LCPNSTGAEIR                                     | 1159.5655 | 1159.5648 | 2     | 59.0  | P46471        | 26S protease regulatory subunit 7                                                                               |
| LcPNSTGAEIR + Carbamidomethyl (C)               | 1216.587  | 1216.5869 | 2     | 74.0  | P46471        | 26S protease regulatory subunit 7                                                                               |
| TFIAIKPDGVQR                                    | 1343.7561 | 1343.7577 | 3     | 41.0  | Q01768        | Nucleoside diphosphate kinase B                                                                                 |
| KVPLQLWGPCPR                                    | 1618.8654 | 1618.8266 | +2;+3 | 63.0  | Q9WUB6        | Chloride channel protein ClC-Kb                                                                                 |

|                                                                     |           |           |       |      |                                            |                                                                                                                                                                                           |
|---------------------------------------------------------------------|-----------|-----------|-------|------|--------------------------------------------|-------------------------------------------------------------------------------------------------------------------------------------------------------------------------------------------|
| SCWDEPLSI AVR                                                       | 1374.6602 | 1374.6612 | 2     | 88.0 | Q8BWN8,Q9QYR<br>9,Q32Q92,O5513<br>7,Q6Q2Z6 | Acyl-coenzyme A thioesterase 4,Acyl-<br>coenzyme A thioesterase 2,<br>mitochondrial,Acyl-coenzyme A<br>thioesterase 6,Acyl-coenzyme A<br>thioesterase 1,Acyl-coenzyme A<br>thioesterase 5 |
| HGIcEDLQR +<br>Carbamidomethyl (C)                                  | 1126.5189 | 1126.5175 | 2     | 87.0 | Q9JLB4                                     | Cubilin                                                                                                                                                                                   |
| DHHTADLCQEK                                                         | 1295.5564 | 1295.5547 | 2     | 59.0 | P21981                                     | Protein-glutamine gamma-<br>glutamyltransferase 2                                                                                                                                         |
| YSGCLTESNLIK                                                        | 1326.6489 | 1326.6446 | 2     | 35.0 | P21981                                     | Protein-glutamine gamma-<br>glutamyltransferase 2                                                                                                                                         |
| SSLQSQCLNEVLK                                                       | 1447.7341 | 1447.738  | 2     | 80.0 | Q9JHU4                                     | Cytoplasmic dynein 1 heavy chain 1                                                                                                                                                        |
| IQFVGACNPPTDPGRKPLSHR                                               | 2289.1801 | 2289.1775 | 4     | 36.0 | Q9JHU4                                     | Cytoplasmic dynein 1 heavy chain 1                                                                                                                                                        |
| MCCPQRPVVNTTTTTVVH                                                  | 2086.9962 | 2087.0051 | 3     | 86.0 | Q9D7I0                                     | Protein shisa-5                                                                                                                                                                           |
| VVDDTACPLLR                                                         | 1200.6173 | 1200.614  | 2     | 42.0 | Q8BY89                                     | Choline transporter-like protein 2                                                                                                                                                        |
| QECLDSR                                                             | 849.3651  | 849.3638  | 2     | 51.0 | Q9R1P4                                     | Proteasome subunit alpha type-1                                                                                                                                                           |
| QECLDSR +<br>Carbamidomethyl (C)                                    | 906.3865  | 906.3842  | 2     | 51.0 | Q9R1P4                                     | Proteasome subunit alpha type-1                                                                                                                                                           |
| LLcNFM R +<br>Carbamidomethyl (C)                                   | 952.4623  | 952.4627  | 2     | 59.0 | Q9R1P4                                     | Proteasome subunit alpha type-1                                                                                                                                                           |
| TYGGcEGPDAMYVK +<br>Carbamidomethyl (C)                             | 1546.6432 | 1546.6461 | 2     | 85.0 | P83940                                     | Transcription elongation factor B<br>polypeptide 1                                                                                                                                        |
| VRPITNQIEcHPYLNQK +<br>Carbamidomethyl (C)                          | 2109.0789 | 2109.0871 | 3     | 93.0 | Q9DCT1                                     | 1,5-anhydro-D-fructose reductase                                                                                                                                                          |
| SLAGSSCVR                                                           | 878.428   | 878.4264  | 2     | 82.0 | O08581                                     | Potassium channel subfamily K member 1                                                                                                                                                    |
| AALLAELASLEADALREHCQR                                               | 2279.1691 | 2279.1674 | 4     | 82.0 | Q3TW96                                     | UDP-N-acetylhexosamine<br>pyrophosphorylase-like protein 1                                                                                                                                |
| ALVDHENVISCPHLGASTK                                                 | 1989.9942 | 1990.0    | +3;+4 | 75.0 | Q61753                                     | D-3-phosphoglycerate dehydrogenase                                                                                                                                                        |
| EcDVL PDDTVSTLYNR +<br>Carbamidomethyl (C)                          | 1895.8571 | 1895.8685 | 2     | 66.0 | Q8R0Y6                                     | Cytosolic 10-formyltetrahydrofolate<br>dehydrogenase                                                                                                                                      |
| GVKEGATLVcGGNQVPRPGFF<br>FQPTVFTDVEDHMYIAK +<br>Carbamidomethyl (C) | 4211.0609 | 4211.056  | 5     | 35.0 | Q8R0Y6                                     | Cytosolic 10-formyltetrahydrofolate<br>dehydrogenase                                                                                                                                      |
| DNPGVVTCLEAR                                                        | 1387.6402 | 1387.643  | 2     | 79.0 | Q02053                                     | Ubiquitin-like modifier-activating enzyme<br>1                                                                                                                                            |

|                                                  |           |           |       |       |                        |                                                                          |
|--------------------------------------------------|-----------|-----------|-------|-------|------------------------|--------------------------------------------------------------------------|
| IYCPFAGYFVESHPSDK                                | 1958.8873 | 1958.8818 | 3     | 79.0  | Q61419                 | Cytidine monophosphate-N-acetylneuraminic acid hydroxylase               |
| ADCKEEHDIR                                       | 1311.5877 | 1311.5852 | +3;+4 | 56.0  | Q91VM9                 | Inorganic pyrophosphatase 2, mitochondrial                               |
| SQTEEDCTEELDFDLHAR                               | 2168.9321 | 2168.9411 | 3     | 115.0 | P99028                 | Cytochrome b-c1 complex subunit 6, mitochondrial                         |
| MVLLCNLKPAAK                                     | 1327.772  | 1327.7739 | 3     | 87.0  | P31230                 | Aminoacyl tRNA synthase complex-interacting multifunctional protein 1    |
| IIEQcLNK + Carbamidomethyl (C)                   | 1016.5324 | 1016.5306 | 2     | 53.0  | Q91WD5                 | NADH dehydrogenase [ubiquinone] iron-sulfur protein 2, mitochondrial     |
| AFCHKFFK                                         | 1026.5109 | 1026.5108 | 3     | 30.0  | Q6ZQM8                 | UDP-glucuronosyltransferase 1-7C                                         |
| IFcHYLEDAAQcPSPSYIPR + 2 Carbamidomethyl (C)     | 2588.1828 | 2588.1976 | 3     | 76.0  | Q6ZQM8                 | UDP-glucuronosyltransferase 1-7C                                         |
| cAQALR + Carbamidomethyl (C)                     | 717.3592  | 717.361   | 2     | 49.0  | P50247                 | Adenosylhomocysteinase                                                   |
| TVAACDLLQGLLHKDQR                                | 1879.9938 | 1879.9886 | 3     | 75.0  | Q9QZS5                 | Serine/threonine-protein kinase Sgk2                                     |
| ILEDLSLGLVcVMHNNHSTK + Carbamidomethyl (C)       | 2694.2894 | 2694.2769 | 4     | 75.0  | Q9R0X4                 | Acyl-coenzyme A thioesterase 9, mitochondrial                            |
| ALSAGNIDDALQCYSEAIK                              | 1980.9462 | 1980.946  | 2     | 75.0  | Q60864                 | Stress-induced-phosphoprotein 1                                          |
| TCDISFSDPDDLNFK                                  | 1828.8189 | 1828.8105 | 2     | 75.0  | P61082                 | NEDD8-conjugating enzyme Ubc12                                           |
| KVNVPLGLVQNMSVFQCPK                              | 2199.1908 | 2199.2047 | 3     | 75.0  | Q9CWD8                 | Iron-sulfur protein NUBPL                                                |
| FGNAFLNRFMCSQLPNQVLK                             | 2326.1714 | 2326.1836 | 3     | 75.0  | Q9EQP2                 | EH domain-containing protein 4                                           |
| TLGKHPVSCK                                       | 1068.575  | 1068.577  | 3     | 46.0  | Q61425                 | Hydroxyacyl-coenzyme A dehydrogenase, mitochondrial                      |
| LVYVCDPVMGDK                                     | 1337.636  | 1337.6365 | 2     | 74.0  | Q8K183                 | Pyridoxal kinase                                                         |
| ATFHPTPFSQLSQIPEAcSTYMF PK + Carbamidomethyl (C) | 2787.3037 | 2787.308  | 3     | 74.0  | Q78JN3                 | Enoyl-CoA delta isomerase 3, peroxisomal                                 |
| MLPDKDCR                                         | 976.447   | 976.4456  | +2;+3 | 43.0  | P18760                 | Cofilin-1                                                                |
| CGEMLHIR                                         | 957.4524  | 957.453   | +2;+3 | 59.0  | Q8R2N1                 | Aquaporin-3                                                              |
| LGEWVGLCK                                        | 1003.5161 | 1003.5164 | 2     | 67.0  | P63323                 | 40S ribosomal protein S12                                                |
| KVVGCSvVVK + Carbamidomethyl (C)                 | 1244.6621 | 1244.6636 | +2;+3 | 44.0  | P63323                 | 40S ribosomal protein S12                                                |
| clIPNHEK + Carbamidomethyl (C)                   | 1009.5015 | 1009.5015 | +2;+3 | 51.0  | Q8VDD5, O08638, Q61879 | Myosin-9, Myosin-11, Myosin-10                                           |
| MEDGVGcLETAEEAKR                                 | 1736.7709 | 1736.7666 | 3     | 53.0  | Q8VDD5                 | Myosin-9                                                                 |
| LKTEGSDLCDR                                      | 1235.5816 | 1235.5793 | 2     | 71.0  | Q91YQ5                 | Dolichyl-diphosphooligosaccharide--protein glycosyltransferase subunit 1 |

|                                                 |           |           |       |      |               |                                                                              |
|-------------------------------------------------|-----------|-----------|-------|------|---------------|------------------------------------------------------------------------------|
| CTVPFDKETGFHR                                   | 1535.7191 | 1535.7219 | 4     | 34.0 | Q9D8T7        | SRA stem-loop-interacting RNA-binding protein, mitochondrial                 |
| IcNQVLVCER + Carbamidomethyl (C)                | 1300.6268 | 1300.6288 | 2     | 73.0 | Q9Z2I9        | Succinate--CoA ligase [ADP-forming] subunit beta, mitochondrial              |
| GRICNQVLVCER + Carbamidomethyl (C)              | 1513.7493 | 1513.7559 | 2     | 31.0 | Q9Z2I9        | Succinate--CoA ligase [ADP-forming] subunit beta, mitochondrial              |
| QLILVGDHcQLGPVVMCK + Carbamidomethyl (C)        | 2077.0523 | 2077.0548 | 3     | 70.0 | Q9EPU0        | Regulator of nonsense transcripts 1                                          |
| GSDFDCELR                                       | 1040.4233 | 1040.4268 | 2     | 69.0 | P61979        | Heterogeneous nuclear ribonucleoprotein K                                    |
| LQTENCeLLQR + Carbamidomethyl (C)               | 1402.6874 | 1402.6947 | 2     | 69.0 | Q9Z1Z0        | General vesicular transport factor p115                                      |
| GHIPYPLPPNYSYGLCSR                              | 2032.9829 | 2032.9819 | 3     | 56.0 | A2AVZ9        | Solute carrier family 43 member 3                                            |
| LAENFcVCHLATGDMLR + Carbamidomethyl (C)         | 2016.922  | 2016.9203 | 3     | 44.0 | Q9WTP6        | Adenylate kinase 2, mitochondrial                                            |
| LELTCSDLQGIYEDGEKPPVpCL R + Carbamidomethyl (C) | 2799.3459 | 2799.3418 | 3     | 68.0 | Q6P4T0        | Autophagy-related protein 2 homolog A                                        |
| ITGCTSPGK                                       | 862.4219  | 862.4228  | 2     | 67.0 | P80315        | T-complex protein 1 subunit delta                                            |
| LVVECVMK                                        | 919.4871  | 919.4886  | 2     | 67.0 | P04117        | Fatty acid-binding protein, adipocyte                                        |
| LVCLTVATDDVDPEGNESIWK                           | 2466.1625 | 2466.1582 | 2     | 66.0 | Q9DBT9        | Dimethylglycine dehydrogenase, mitochondrial                                 |
| SWHNVYCVINNQEIMGFYK                             | 2230.9928 | 2230.9941 | 3     | 66.0 | Q62261        | Spectrin beta chain, non-erythrocytic 1                                      |
| cPNCGTHYK + Carbamidomethyl (C)                 | 1146.4586 | 1146.464  | +2;+3 | 44.0 | P19536        | Cytochrome c oxidase subunit 5B, mitochondrial                               |
| LCVPAMNVNDSVTK                                  | 1489.7269 | 1489.7288 | 2     | 65.0 | Q68FL4,Q80SW1 | Putative adenosylhomocysteinase 3,Putative adenosylhomocysteinase 2          |
| DRDNHcGLATAASYPVVN + Carbamidomethyl (C)        | 1958.8905 | 1958.8945 | 3     | 65.0 | P06797        | Cathepsin L1                                                                 |
| VSEDMCMK                                        | 941.3656  | 941.3652  | 2     | 65.0 | Q99KP3        | Lambda-crystallin homolog                                                    |
| AYFPcIGCVHAISTDSPLEPVLK + Carbamidomethyl (C)   | 2699.2975 | 2699.3088 | 3     | 51.0 | O08677        | Kininogen-1                                                                  |
| DcDLDVACR + Carbamidomethyl (C)                 | 1133.4482 | 1133.4567 | 2     | 36.0 | P47740,P47739 | Fatty aldehyde dehydrogenase,Aldehyde dehydrogenase, dimeric NADP-preferring |
| FIGTQSIHK                                       | 1132.5699 | 1132.5696 | 3     | 65.0 | O88986        | 2-amino-3-ketobutyrate coenzyme A ligase, mitochondrial                      |
| cEVTPDVNISGQK + Carbamidomethyl (C)             | 1445.6821 | 1445.6842 | 2     | 64.0 | Q8CIB5        | Fermitin family homolog 2                                                    |

|                                               |           |           |   |       |                          |                                                                                                   |
|-----------------------------------------------|-----------|-----------|---|-------|--------------------------|---------------------------------------------------------------------------------------------------|
| EGYAWAEDKEHCEEYGR                             | 2070.8377 | 2070.8353 | 3 | 64.0  | Q99LF4                   | tRNA-splicing ligase RtcB homolog                                                                 |
| TVYHAEVQCQDGR                                 | 1505.6569 | 1505.6624 | 3 | 65.0  | P97314                   | Cysteine and glycine-rich protein 2                                                               |
| cFSEENHEPLR +<br>Carbamidomethyl (C)          | 1416.6092 | 1416.6069 | 3 | 63.0  | Q9EQH3                   | Vacuolar protein sorting-associated<br>protein 35                                                 |
| GSIHKFVPLYIAGIQHSCQDIGA<br>K                  | 2581.3475 | 2581.3591 | 4 | 67.0  | P24547                   | Inosine-5'-monophosphate<br>dehydrogenase 2                                                       |
| HVPGASFFDIEECR                                | 1605.7246 | 1605.7257 | 3 | 62.0  | P52196                   | Thiosulfate sulfurtransferase                                                                     |
| YSEANRIEECEQAER                               | 1954.8326 | 1954.8294 | 3 | 62.0  | Q8R180                   | ERO1-like protein alpha                                                                           |
| AIGAVPLIQGEYMIPCEK                            | 1930.9896 | 1930.9982 | 2 | 55.0  | P18242                   | Cathepsin D                                                                                       |
| AIGAVPLIQGEYMIPCEKVSSLP<br>TVYLK              | 3018.6174 | 3018.6517 | 3 | 32.0  | P18242                   | Cathepsin D                                                                                       |
| CTIKTDPVTGR                                   | 1189.6125 | 1189.5746 | 3 | 58.0  | Q9Z130                   | Heterogeneous nuclear<br>ribonucleoprotein D-like                                                 |
| ScYLSLDDLLLEHR +<br>Carbamidomethyl (C)       | 1704.8505 | 1704.8433 | 3 | 65.0  | Q922B1                   | O-acetyl-ADP-ribose deacetylase<br>MACROD1                                                        |
| cEFDPLHTVLLK +<br>Carbamidomethyl (C)         | 1470.7541 | 1470.7526 | 3 | 61.0  | Q3UMF0                   | Cordon-bleu protein-like 1                                                                        |
| SSSALHFCR                                     | 1006.4654 | 1006.4654 | 3 | 60.0  | Q9D273                   | Cob(II)yrinic acid a,c-diamide<br>adenosyltransferase, mitochondrial                              |
| SIVTSDALAPQVDAISADCP<br>SLQTK                 | 2529.2632 | 2529.274  | 2 | 62.0  | Q8BGA8                   | Acyl-coenzyme A synthetase ACSM5,<br>mitochondrial                                                |
| ATCIGNNSAAAVSMLK                              | 1549.7592 | 1549.7654 | 2 | 60.0  | Q9R1P0                   | Proteasome subunit alpha type-4                                                                   |
| NPDGYcGLGGTGVSCPMAIK +<br>Carbamidomethyl (C) | 2063.9115 | 2063.9256 | 2 | 60.0  | Q9D6Y7                   | Mitochondrial peptide methionine<br>sulfoxide reductase                                           |
| CDIDIR                                        | 733.3429  | 733.3422  | 2 | 55.0  | P68134,P62737,P<br>63268 | Actin, alpha skeletal muscle,Actin, aortic<br>smooth muscle,Actin, gamma-enteric<br>smooth muscle |
| AITIASAVNCPYVVHVMSK                           | 2115.122  | 2115.1359 | 3 | 100.0 | Q9EQF5                   | Dihydropyrimidinase                                                                               |
| LFACSNR                                       | 809.3854  | 809.3866  | 2 | 44.0  | P13020                   | Gelsolin                                                                                          |
| MEEFKDQLPADEcNK +<br>Carbamidomethyl (C)      | 1852.7971 | 1852.7962 | 3 | 58.0  | P38647                   | Stress-70 protein, mitochondrial                                                                  |
| GANQcVQAAR +<br>Carbamidomethyl (C)           | 1073.5036 | 1073.4968 | 2 | 58.0  | Q8R1Q9                   | Ribokinase                                                                                        |
| YHTVNGHNcEVR +<br>Carbamidomethyl (C)         | 1484.6579 | 1484.6558 | 3 | 68.0  | P49312                   | Heterogeneous nuclear<br>ribonucleoprotein A1                                                     |
| TlcWCGVQHDR +<br>Carbamidomethyl (C)          | 1373.5969 | 1373.591  | 2 | 57.0  | Q49B93                   | Sodium-coupled monocarboxylate<br>transporter 2                                                   |

|                                                |           |           |       |      |        |                                                       |
|------------------------------------------------|-----------|-----------|-------|------|--------|-------------------------------------------------------|
| NKEWRPQDAEPCAHNSR                              | 2133.9762 | 2133.9763 | +3;+4 | 59.0 | Q9Z2V4 | Phosphoenolpyruvate carboxykinase, cytosolic [GTP]    |
| NMAcVQR + Carbamidomethyl (C)                  | 877.3898  | 877.3889  | 2     | 56.0 | Q9WVA4 | Transgelin-2                                          |
| NGPCGTVLR                                      | 915.4596  | 915.459   | 2     | 56.0 | Q91X17 | Uromodulin                                            |
| PAICALR                                        | 742.416   | 742.4169  | 2     | 55.0 | Q02248 | Catenin beta-1                                        |
| SCLLLR                                         | 703.4051  | 703.4057  | 2     | 49.0 | P62821 | Ras-related protein Rab-1A                            |
| SCLLIR                                         | 703.4051  | 703.4057  | 2     | 49.0 | A2AS89 | Agmatinase, mitochondrial                             |
| HGYPLILYDVFPDVCK                               | 1877.9386 | 1877.949  | 3     | 77.0 | Q99L13 | 3-hydroxyisobutyrate dehydrogenase, mitochondrial     |
| ISFRPGNQECYDNFLQTGETAK                         | 2517.1594 | 2517.1747 | 3     | 54.0 | P55014 | Solute carrier family 12 member 1                     |
| LLVDADNCLHR                                    | 1267.6343 | 1267.6372 | 3     | 54.0 | Q6A0A9 | Constitutive coactivator of PPAR-gamma-like protein 1 |
| YWCNDGKTPR                                     | 1238.5502 | 1238.5479 | 3     | 42.0 | P08905 | Lysozyme C-2                                          |
| CLGNPER                                        | 787.3647  | 787.363   | 2     | 39.0 | P50516 | V-type proton ATPase catalytic subunit A              |
| FCPFYK                                         | 803.3676  | 803.3688  | 2     | 47.0 | P50516 | V-type proton ATPase catalytic subunit A              |
| cYEMASHLR + Carbamidomethyl (C)                | 1165.5008 | 1165.5046 | 3     | 54.0 | P62962 | Profilin-1                                            |
| ICLDHFKPLWAR                                   | 1598.8391 | 1598.8401 | 4     | 51.0 | Q9CR09 | Ubiquitin-fold modifier-conjugating enzyme 1          |
| MIDVNALTDKEcDWLNSYHQ TCR + Carbamidomethyl (C) | 2879.2677 | 2879.2687 | 4     | 51.0 | Q6P1B1 | Xaa-Pro aminopeptidase 1                              |
| TCFSMVPALQK                                    | 1223.6042 | 1223.606  | 2     | 51.0 | P85094 | Isochorismatase domain-containing protein 2A          |
| cGLSTHVEIGHR + Carbamidomethyl (C)             | 1364.6619 | 1364.6597 | +3;+4 | 50.0 | O70362 | Phosphatidylinositol-glycan-specific phospholipase D  |
| SSPVEYECINEK                                   | 1396.618  | 1396.622  | 2     | 50.0 | Q8BT60 | Copine-3                                              |
| cNNVLYIR + Carbamidomethyl (C)                 | 1050.528  | 1050.529  | 2     | 50.0 | P62307 | Small nuclear ribonucleoprotein F                     |
| LPCVAAK                                        | 700.3942  | 700.397   | 2     | 54.0 | Q9CZU6 | Citrate synthase, mitochondrial                       |
| cLHTDMADITK + Carbamidomethyl (C)              | 1303.5901 | 1303.5901 | 3     | 49.0 | Q9JIY7 | N-acetyltransferase 8                                 |
| RCAVYK                                         | 901.448   | 901.4453  | 2     | 33.0 | O55142 | 60S ribosomal protein L35a                            |
| TPNPYASDNSSLMFPIVAFGV FIPTLFLCRL               | 3645.8438 | 3645.8776 | 3     | 49.0 | Q6ZQI3 | Malectin                                              |
| cDKEYFAER + Carbamidomethyl (C)                | 1315.5867 | 1315.5845 | 3     | 49.0 | P63254 | Cysteine-rich protein 1                               |
| NCCEASRPFTLR                                   | 1395.6387 | 1395.6387 | 3     | 41.0 | Q9DCW2 | Phospholipid scramblase 2                             |
| NCCEASRPFTLR + Carbamidomethyl (C)             | 1452.6602 | 1452.6673 | +2;+3 | 42.0 | Q9DCW2 | Phospholipid scramblase 2                             |
| FCGGLIK                                        | 736.3942  | 736.3952  | 2     | 49.0 | O88343 | Electrogenic sodium bicarbonate cotransporter 1       |

|                                                          |           |           |       |      |               |                                                                                          |
|----------------------------------------------------------|-----------|-----------|-------|------|---------------|------------------------------------------------------------------------------------------|
| AADGAAEPGVVLQMLEAAEE<br>RPWLWVVYILTVALPVFLVILF<br>CCSGKK | 5214.7728 | 5214.7981 | +4;+5 | 40.0 | P35564        | Calnexin                                                                                 |
| LMCPQEIVDYIADKK                                          | 1764.879  | 1764.8748 | 3     | 48.0 | Q9CR21        | Acyl carrier protein, mitochondrial                                                      |
| FcSDRPSEVPEK +<br>Carbamidomethyl (C)                    | 1449.6558 | 1449.6605 | 2     | 49.0 | P11930        | Nucleoside diphosphate-linked moiety X<br>motif 19                                       |
| cQAEAEMDEIRK +<br>Carbamidomethyl (C)                    | 1478.6493 | 1478.6487 | 2     | 48.0 | Q6P9Q6        | FK506-binding protein 15                                                                 |
| NSIEEEEKEATAAGPIICR                                      | 2058.9891 | 2059.0022 | 3     | 61.0 | Q3UHK1        | Proton myo-inositol cotransporter                                                        |
| RGSLcSGCQKPITGR +<br>Carbamidomethyl (C)                 | 1686.8294 | 1686.8279 | 3     | 40.0 | Q8VI36        | Paxillin                                                                                 |
| EASGSACDLPR                                              | 1104.487  | 1104.4797 | 2     | 48.0 | Q6PDY2        | 2-aminoethanethiol dioxygenase                                                           |
| YHTINGHNCEVK                                             | 1413.6459 | 1413.6491 | +2;+3 | 44.0 | Q8BG05        | Heterogeneous nuclear<br>ribonucleoprotein A3                                            |
| YHTINGHNCEVKK                                            | 1541.7409 | 1541.7384 | +3;+4 | 41.0 | Q8BG05        | Heterogeneous nuclear<br>ribonucleoprotein A3                                            |
| GPWGGIHCRCR                                              | 981.4603  | 981.4624  | 3     | 49.0 | Q3UEG6        | Alanine--glyoxylate aminotransferase 2,<br>mitochondrial                                 |
| DcScAPDCcQAK + 3<br>Carbamidomethyl (C)                  | 1617.5568 | 1617.6202 | 2     | 32.0 | Q3UEG6        | Alanine--glyoxylate aminotransferase 2,<br>mitochondrial                                 |
| ACIPFLK                                                  | 790.4411  | 790.4422  | 2     | 47.0 | Q2TPA8        | Hydroxysteroid dehydrogenase-like<br>protein 2                                           |
| FICDASSLHQVR                                             | 1374.6714 | 1374.6871 | 2     | 47.0 | Q8K0Z7        | Translational activator of cytochrome c<br>oxidase 1                                     |
| VVPDSCCK                                                 | 849.3725  | 849.3722  | 2     | 47.0 | Q35566        | CD151 antigen                                                                            |
| YCTQDAFFQIK                                              | 1362.6278 | 1362.6298 | 2     | 48.0 | Q35459        | Delta(3,5)-Delta(2,4)-dienoyl-CoA<br>isomerase, mitochondrial                            |
| KYGLNMCR                                                 | 983.4681  | 983.4692  | +2;+3 | 50.0 | P62274        | 40S ribosomal protein S29                                                                |
| DLMACAQTGSQK                                             | 1180.5216 | 1180.5151 | 2     | 46.0 | Q61496,P16381 | Probable ATP-dependent RNA helicase<br>DDX4, Putative ATP-dependent RNA<br>helicase P110 |
| AHSPILNTEGTVIGTVTSGCPSP<br>SLKK                          | 2693.4058 | 2693.4192 | 3     | 46.0 | Q8CFA2        | Aminomethyltransferase, mitochondrial                                                    |
| ALCPVIPK                                                 | 839.4939  | 839.4944  | 2     | 46.0 | Q8K1R3        | Polyribonucleotide nucleotidyltransferase<br>1, mitochondrial                            |
| SSILLDVKPDWDETDMAQLET<br>CVR                             | 2763.3095 | 2763.2952 | 3     | 46.0 | P57776        | Elongation factor 1-delta                                                                |

|                                             |           |           |   |      |               |                                                                                                                    |
|---------------------------------------------|-----------|-----------|---|------|---------------|--------------------------------------------------------------------------------------------------------------------|
| cAVVEFK + Carbamidomethyl (C)               | 851.4211  | 851.4231  | 2 | 55.0 | Q9D0E1        | Heterogeneous nuclear ribonucleoprotein M                                                                          |
| AKDDSELEGQVISCLK                            | 1733.8505 | 1733.8608 | 3 | 45.0 | Q61543        | Golgi apparatus protein 1                                                                                          |
| YLAADKDGNTVCER                              | 1553.7144 | 1553.7112 | 3 | 45.0 | Q61553        | Fascin                                                                                                             |
| QDQVCIAR                                    | 931.4545  | 931.4537  | 2 | 44.0 | Q8R050        | Eukaryotic peptide chain release factor GTP-binding subunit ERF3A                                                  |
| LICEMK                                      | 735.3659  | 735.3666  | 2 | 44.0 | Q9CQR4        | Acyl-coenzyme A thioesterase 13                                                                                    |
| VTTTSIESPFNHGCVR                            | 1746.8359 | 1746.8374 | 3 | 44.0 | Q80TN5        | Palmitoyltransferase ZDHHC17                                                                                       |
| cLELLK + Carbamidomethyl (C)                | 774.4309  | 774.4332  | 2 | 44.0 | P15533        | Tripartite motif-containing protein 30A                                                                            |
| cNSLPAK + Carbamidomethyl (C)               | 788.3851  | 788.3841  | 2 | 44.0 | Q9QZ88        | Vacuolar protein sorting-associated protein 29                                                                     |
| ILLNACcPGWVR + Carbamidomethyl (C)          | 1468.7319 | 1468.7304 | 2 | 44.0 | P48758        | Carbonyl reductase [NADPH] 1                                                                                       |
| cMDVYTPK + Carbamidomethyl (C)              | 1012.4358 | 1012.4323 | 2 | 44.0 | P67871        | Casein kinase II subunit beta                                                                                      |
| ELPGHTGYLSCcR + Carbamidomethyl (C)         | 1559.6861 | 1559.6732 | 2 | 44.0 | P29387,P62880 | Guanine nucleotide-binding protein subunit beta-4,Guanine nucleotide-binding protein G(I)/G(S)/G(T) subunit beta-2 |
| NYcRNPdGDVNGPWCYTTNPR + Carbamidomethyl (C) | 2498.0492 | 2498.0724 | 3 | 43.0 | P20918        | Plasminogen                                                                                                        |
| GCFECCIK                                    | 901.3496  | 901.3497  | 2 | 43.0 | P35802,P35803 | Neuronal membrane glycoprotein M6-a,Neuronal membrane glycoprotein M6-b                                            |
| FAQLCEK                                     | 837.4055  | 837.4103  | 2 | 47.0 | P11588        | Major urinary protein 1                                                                                            |
| cEVFVGK + Carbamidomethyl (C)               | 837.4055  | 837.4062  | 2 | 42.0 | P86049        | Probable RNA-binding protein 46                                                                                    |
| FcINPK + Carbamidomethyl (C)                | 777.3843  | 777.385   | 2 | 35.0 | P79457        | Histone demethylase UTY                                                                                            |
| FFAPECGR                                    | 925.4116  | 925.4131  | 2 | 41.0 | Q8CI51        | PDZ and LIM domain protein 5                                                                                       |
| LPECEK                                      | 717.3367  | 717.3344  | 2 | 40.0 | Q9D8W5        | 26S proteasome non-ATPase regulatory subunit 12                                                                    |
| QGRPESCLR                                   | 1044.5134 | 1044.5121 | 3 | 40.0 | Q8VC69        | Solute carrier family 22 member 6                                                                                  |
| ANFIEADKYFLPFELACQSK                        | 2333.1402 | 2333.1438 | 3 | 40.0 | A2A5R2        | Brefeldin A-inhibited guanine nucleotide-exchange protein 2                                                        |



|                                                     |           |           |       |       |        |                                                              |
|-----------------------------------------------------|-----------|-----------|-------|-------|--------|--------------------------------------------------------------|
| VVGICGTQEK                                          | 1032.5274 | 1032.5305 | 2     | 63.0  | Q8VDQ1 | Prostaglandin reductase 2                                    |
| VTSLGKDWHRPCLR                                      | 1666.8726 | 1666.8687 | 4     | 39.0  | Q9DCT8 | Cysteine-rich protein 2                                      |
| TGCPLLR                                             | 871.4949  | 871.4969  | 2     | 41.0  | Q9Z2C9 | Myotubularin-related protein 7                               |
| TcPLLLR + Carbamidomethyl (C)                       | 871.4949  | 871.4969  | 2     | 41.0  | O55128 | Histone deacetylase complex subunit SAP18                    |
| PMILGYWNVRLTHPIR                                    | 2022.0985 | 2022.097  | 4     | 38.0  | P10649 | Glutathione S-transferase Mu 1                               |
| IEECAAR                                             | 790.3643  | 790.3668  | 2     | 55.0  | P16332 | Methylmalonyl-CoA mutase, mitochondrial                      |
| IEEcAAR + Carbamidomethyl (C)                       | 847.3858  | 847.388   | 2     | 55.0  | P16332 | Methylmalonyl-CoA mutase, mitochondrial                      |
| AHCQTSGWSLTEQDPYNNIVR                               | 2418.1022 | 2418.0972 | 3     | 31.0  | P16332 | Methylmalonyl-CoA mutase, mitochondrial                      |
| ccGGGEPRPR + 2 Carbamidomethyl (C)                  | 1144.4866 | 1144.486  | 3     | 37.0  | O70228 | Probable phospholipid-transporting ATPase IIA                |
| cTNcAR + 2 Carbamidomethyl (C)                      | 848.3269  | 848.3288  | 2     | 44.0  | P62855 | 40S ribosomal protein S26                                    |
| cTGGcAR + 2 Carbamidomethyl (C)                     | 848.3269  | 848.3288  | 2     | 44.0  | Q91XD3 | Transmembrane 4 L6 family member 4                           |
| GPGLFFILPCTDSLIK                                    | 1719.927  | 1719.9333 | 2     | 32.0  | P54116 | Erythrocyte band 7 integral membrane protein                 |
| NYSFYALDNQNLR                                       | 1616.7583 | 1616.7337 | 2     | 33.0  | P15208 | Insulin receptor                                             |
| cHLQPRSQER + Carbamidomethyl (C)                    | 1309.6309 | 1309.614  | 3     | 33.0  | Q6NZL8 | Signal peptide, CUB and EGF-like domain-containing protein 1 |
| ScEEFMK + Carbamidomethyl (C)                       | 929.3623  | 929.3632  | 2     | 32.0  | P12658 | Calbindin                                                    |
| AVCVLKGDPVQGTIHFEQK                                 | 2125.099  | 2125.1044 | 4     | 31.0  | P08228 | Superoxide dismutase [Cu-Zn]                                 |
| cGESGHLAR + Carbamidomethyl (C)                     | 985.44    | 985.4378  | 3     | 31.0  | P53996 | Cellular nucleic acid-binding protein                        |
| cQLLQQR + Carbamidomethyl (C)                       | 944.4862  | 944.4841  | 2     | 31.0  | Q99P31 | Hsp70-binding protein 1                                      |
| NcAVSDLQK + Carbamidomethyl (C)                     | 1033.4862 | 1033.485  | 2     | 30.0  | Q8VDT1 | Sodium/glucose cotransporter 4                               |
| AIEEAPSVHHVNPCKD                                    | 1831.8523 | 1831.8576 | +3;+4 | 62.0  | Q8BWM0 | Prostaglandin E synthase 2                                   |
| EGSSGKPVTLQELWGPCPR                                 | 2040.0099 | 2040.0163 | 3     | 80.0  | Q9WUB7 | Chloride channel protein ClC-Ka                              |
| TPVSEHVTK                                           | 996.524   | 996.5231  | 2     | 89.0  | P07724 | Serum albumin                                                |
| AEFQPLVEEPK                                         | 1285.6554 | 1285.6622 | 2     | 55.0  | P07724 | Serum albumin                                                |
| EFKAETFFHSDICTLPEK + Carbamidomethyl (C)            | 2299.0831 | 2299.0927 | 3     | 76.0  | P07724 | Serum albumin                                                |
| ccAEANPPAcYGTVLAEFQPLV EEPK + 3 Carbamidomethyl (C) | 3085.3871 | 3085.3933 | 3     | 103.0 | P07724 | Serum albumin                                                |
| cDNGYcIPASWR + 2 Carbamidomethyl (C)                | 1497.6129 | 1497.6256 | 2     | 35.0  | A2ARV4 | Low-density lipoprotein receptor-related protein 2           |

|                                                              |           |           |       |       |               |                                                                          |
|--------------------------------------------------------------|-----------|-----------|-------|-------|---------------|--------------------------------------------------------------------------|
| NSKGSYEcFcVDGFK + 2 Carbamidomethyl (C)                      | 1796.7498 | 1796.7573 | +2;+3 | 50.0  | A2ARV4        | Low-density lipoprotein receptor-related protein 2                       |
| ScSPYNSFIVVSMPLPAVR + Carbamidomethyl (C)                    | 2026.0016 | 2026.0096 | 2     | 153.0 | A2ARV4        | Low-density lipoprotein receptor-related protein 2                       |
| WcALSHLER + Carbamidomethyl (C)                              | 1170.5604 | 1170.5655 | +2;+3 | 50.0  | Q92111        | Serotransferrin                                                          |
| cLKDGGGDVAFVK + Carbamidomethyl (C)                          | 1364.6759 | 1364.6826 | 3     | 40.0  | Q92111        | Serotransferrin                                                          |
| NIAFFSTNcVEGTAR + Carbamidomethyl (C)                        | 1685.7832 | 1685.7907 | 2     | 93.0  | Q8VDN2        | Sodium/potassium-transporting ATPase subunit alpha-1                     |
| TGLEIREIYQQTETGLcR + Carbamidomethyl (C)                     | 2208.1208 | 2208.1328 | 3     | 76.0  | Q8K0L3        | Acyl-coenzyme A synthetase ACSM2, mitochondrial                          |
| NANSLGGGFHcW + Carbamidomethyl (C)                           | 1318.5513 | 1318.5577 | 2     | 41.0  | Q9D964        | Glycine amidinotransferase, mitochondrial                                |
| IQEAGTEVVKAK                                                 | 1271.7085 | 1271.7098 | 3     | 76.0  | P08249        | Malate dehydrogenase, mitochondrial                                      |
| WKAYDATcLVK + Carbamidomethyl (C)                            | 1353.6751 | 1353.6822 | +2;+3 | 78.0  | Q9R0P3        | S-formylglutathione hydrolase                                            |
| NTKIlcQGFTGK + Carbamidomethyl (C)                           | 1365.7075 | 1365.7147 | 3     | 40.0  | Q9WUM5        | Succinate--CoA ligase [ADP/GDP-forming] subunit alpha, mitochondrial     |
| RVAAVETEhGSIQTPcVVNcA GVVASK + 2 Carbamidomethyl (C)         | 2993.4488 | 2993.462  | 4     | 58.0  | Q99LB7        | Sarcosine dehydrogenase, mitochondrial                                   |
| STTTGHLYIK                                                   | 1119.5924 | 1119.596  | 2     | 68.0  | P10126,P62631 | Elongation factor 1-alpha 1,Elongation factor 1-alpha 2                  |
| QVEIAQR                                                      | 842.461   | 842.4631  | 2     | 35.0  | P16460        | Argininosuccinate synthase                                               |
| VFDYSEYWEGARGLYAAFDcT ATMK + Carbamidomethyl (C)             | 2950.2942 | 2950.3177 | 3     | 90.0  | Q05920        | Pyruvate carboxylase, mitochondrial                                      |
| SSFANQGEIcLcTSR + 2 Carbamidomethyl (C)                      | 1796.7822 | 1796.8029 | 2     | 97.0  | Q8BH00        | Aldehyde dehydrogenase family 8 member A1                                |
| AAFGLSEAGFNTAcLTKLFPTR + Carbamidomethyl (C)                 | 2371.1994 | 2371.2039 | 3     | 128.0 | Q8K2B3        | Succinate dehydrogenase [ubiquinone] flavoprotein subunit, mitochondrial |
| HVNGQDQIVPGLYAcGEAAcA SVHGAnR + 2 Carbamidomethyl (C)        | 3018.3825 | 3018.3791 | 4     | 54.0  | Q8K2B3        | Succinate dehydrogenase [ubiquinone] flavoprotein subunit, mitochondrial |
| STDRVLGAHILGPGAGEMVNE AALALEYGAScEDIAR + Carbamidomethyl (C) | 3812.8461 | 3812.8597 | 4     | 38.0  | O08749        | Dihydrolipoyl dehydrogenase, mitochondrial                               |
| ITFcIDPSLGLNEEQK + Carbamidomethyl (C)                       | 1862.9084 | 1862.9151 | 2     | 88.0  | Q9D7B6        | Isobutyryl-CoA dehydrogenase, mitochondrial                              |

|                                                         |           |           |       |       |                      |                                                           |
|---------------------------------------------------------|-----------|-----------|-------|-------|----------------------|-----------------------------------------------------------|
| PGWScLVTGAGGFLGQRIVR + Carbamidomethyl (C)              | 2130.1157 | 2130.1197 | 3     | 84.0  | Q61694               | 3 beta-hydroxysteroid dehydrogenase type 5                |
| KPGPGMNGAVEPcAQPR + Carbamidomethyl (C)                 | 1764.84   | 1764.843  | 3     | 62.0  | Q9JIL4               | Na(+)/H(+) exchange regulatory cofactor NHE-RF3           |
| VIDNGSGMcK + Carbamidomethyl (C)                        | 1079.474  | 1079.471  | 2     | 69.0  | P63260               | Actin, cytoplasmic 2                                      |
| cNVSSLHTSHcLASGEVMVSTL GDLQGNGK + 2 Carbamidomethyl (C) | 3225.4853 | 3225.5092 | +3;+4 | 117.0 | P17563               | Selenium-binding protein 1                                |
| FSPDLWGVSVcTVDGQR + Carbamidomethyl (C)                 | 1921.8993 | 1921.9043 | 2     | 118.0 | D3Z7P3               | Glutaminase kidney isoform, mitochondrial                 |
| LALIQLQVSSIKSDNLTR                                      | 1998.1473 | 1998.1447 | 3     | 68.0  | Q9JHW2               | Omega-amidase NIT2                                        |
| DSScSQGDYLVLR + Carbamidomethyl (C)                     | 1498.6722 | 1498.6699 | 2     | 104.0 | Q9JLB4               | Cubilin                                                   |
| cGGLAASAMDELLR + Carbamidomethyl (C)                    | 1462.6908 | 1462.6948 | 2     | 124.0 | Q99J39               | Malonyl-CoA decarboxylase, mitochondrial                  |
| SGTGQQLGQAAEESNccAR + 2 Carbamidomethyl (C)             | 2022.8483 | 2022.8626 | 2     | 94.0  | Q9JIZ9               | Phospholipid scramblase 3                                 |
| GSAITGPVAKEcADLWPR + Carbamidomethyl (C)                | 1926.9622 | 1926.9773 | 3     | 50.0  | P62830               | 60S ribosomal protein L23                                 |
| TPScCYLWcGKcSGDER + 4 Carbamidomethyl (C)               | 2259.8806 | 2259.8871 | 3     | 50.0  | Q62468               | Villin-1                                                  |
| SSGGFVWAcK + Carbamidomethyl (C)                        | 1097.4964 | 1097.4978 | 2     | 75.0  | P54071               | Isocitrate dehydrogenase [NADP], mitochondrial            |
| NLESTRcLLAGLQHQK + Carbamidomethyl (C)                  | 2014.0418 | 2014.0382 | 3     | 55.0  | Q8BP40               | Lysophosphatidic acid phosphatase type 6                  |
| AATGEEVSAEDLGGADLHcRK + Carbamidomethyl (C)             | 2185.0069 | 2185.0161 | 3     | 39.0  | Q3ULD5               | Methylcrotonoyl-CoA carboxylase beta chain, mitochondrial |
| FcFIKK + Carbamidomethyl (C)                            | 841.452   | 841.4546  | 2     | 33.0  | Q71R19               | Kynurenine--oxoglutarate transaminase 3                   |
| MDDPEcYFNSLPK + Carbamidomethyl (C)                     | 1614.6694 | 1614.6769 | 2     | 75.0  | Q71R19               | Kynurenine--oxoglutarate transaminase 3                   |
| VIAATGSDEKcK + Carbamidomethyl (C)                      | 1277.6285 | 1277.627  | 2     | 65.0  | Q3UNZ8               | Quinone oxidoreductase-like protein 2                     |
| VDcTQHYAVcSEHQVR + 2 Carbamidomethyl (C)                | 2055.8891 | 2055.8986 | +3;+4 | 89.0  | Q91W90               | Thioredoxin domain-containing protein 5                   |
| NQHIPPQYcGScWAHGSTSAMADR + 2 Carbamidomethyl (C)        | 2701.122  | 2701.1665 | 4     | 57.0  | Q9WUU7               | Cathepsin Z                                               |
| NVVHLcK + Carbamidomethyl (C)                           | 868.4589  | 868.4603  | 2     | 46.0  | Q80W22               | Threonine synthase-like 2                                 |
| EGLLLWcQR + Carbamidomethyl (C)                         | 1173.5965 | 1173.6003 | 2     | 53.0  | Q7TPR4,O88990,Q9JI91 | Alpha-actinin-1,Alpha-actinin-3,Alpha-actinin-2           |
| VAVNGVHLHYQR                                            | 1391.7422 | 1391.7516 | 4     | 31.0  | Q8R164               | Valacyclovir hydrolase                                    |
| AVPTGDVEDLPcGLLSSVGKY + Carbamidomethyl (C)             | 2289.1563 | 2289.1746 | 2     | 100.0 | Q61578               | NADPH:adrenodoxin oxidoreductase, mitochondrial           |

|                                                              |           |           |       |      |        |                                                                                    |
|--------------------------------------------------------------|-----------|-----------|-------|------|--------|------------------------------------------------------------------------------------|
| TLESIMAccLSEEAKEAR + 2<br>Carbamidomethyl (C)                | 2096.954  | 2096.9555 | 3     | 94.0 | P21279 | Guanine nucleotide-binding protein G(q)<br>subunit alpha                           |
| TGLSQLGR                                                     | 830.461   | 830.4628  | 2     | 71.0 | Q9Z2V4 | Phosphoenolpyruvate carboxykinase,<br>cytosolic [GTP]                              |
| cSEGVFLTTTPRPVIVEPLEQL<br>DDEDGLPEK +<br>Carbamidomethyl (C) | 3595.7968 | 3595.8277 | 3     | 86.0 | Q8VIJ6 | Splicing factor, proline- and glutamine-<br>rich                                   |
| KTAAVcVAK +<br>Carbamidomethyl (C)                           | 946.527   | 946.5227  | 2     | 53.0 | O35643 | AP-1 complex subunit beta-1                                                        |
| EAQSIcERVTPR +<br>Carbamidomethyl (C)                        | 1444.7092 | 1444.7123 | 3     | 53.0 | O35643 | AP-1 complex subunit beta-1                                                        |
| KNcPHIVVGTpGR +<br>Carbamidomethyl (C)                       | 1433.7562 | 1433.7591 | 3     | 51.0 | Q9Z1N5 | Spliceosome RNA helicase Ddx39b                                                    |
| SSKAcGANLPENFSISQIFSQA<br>MAAR + Carbamidomethyl<br>(C)      | 2784.3323 | 2784.3406 | 3     | 78.0 | P34914 | Bifunctional epoxide hydrolase 2                                                   |
| YLVVNADEGEGPTcKDR +<br>Carbamidomethyl (C)                   | 1921.884  | 1921.8939 | 3     | 52.0 | Q91YT0 | NADH dehydrogenase [ubiquinone]<br>flavoprotein 1, mitochondrial                   |
| VASGQALAAFcLTPSSGSDVA<br>SIR + Carbamidomethyl (C)           | 2493.2169 | 2493.2264 | 3     | 76.0 | P50544 | Very long-chain specific acyl-CoA<br>dehydrogenase, mitochondrial                  |
| TKQEQQAscTWFGK +<br>Carbamidomethyl (C)                      | 1697.7832 | 1697.7898 | 3     | 75.0 | O70589 | Peripheral plasma membrane protein<br>CASK                                         |
| TlCshVQNMIKGVTLGFR +<br>Carbamidomethyl (C)                  | 2060.0659 | 2060.0713 | +3;+4 | 72.0 | P51410 | 60S ribosomal protein L9                                                           |
| DKSTDccGDNDPIDVcEIGSK +<br>3 Carbamidomethyl (C)             | 2520.0091 | 2520.0132 | 3     | 51.0 | Q91VM9 | Inorganic pyrophosphatase 2,<br>mitochondrial                                      |
| VVEscQAEVnk +<br>Carbamidomethyl (C)                         | 1261.5972 | 1261.6008 | 2     | 68.0 | Q3TCJ1 | BRISC complex subunit Abro1                                                        |
| NLAMEATYINHNFsQQcLR +<br>Carbamidomethyl (C)                 | 2309.0681 | 2309.0779 | 3     | 66.0 | O70194 | Eukaryotic translation initiation factor 3<br>subunit D                            |
| NIQKITK                                                      | 843.5178  | 843.4956  | 2     | 34.0 | Q91VR2 | ATP synthase subunit gamma,<br>mitochondrial                                       |
| KYAAELHLVHWNTK                                               | 1708.9049 | 1708.9098 | 3     | 41.0 | P00920 | Carbonic anhydrase 2                                                               |
| ScESDAPFPVHPGTPecTK + 3<br>Carbamidomethyl (C)               | 2342.9606 | 2411.0062 | 3     | 69.0 | P21614 | Vitamin D-binding protein                                                          |
| cVSSSHFQVAER +<br>Carbamidomethyl (C)                        | 1405.6409 | 1405.6482 | 2     | 62.0 | Q6PD03 | Serine/threonine-protein phosphatase 2A<br>56 kDa regulatory subunit alpha isoform |
| GcWDSIHVVEVQEK +<br>Carbamidomethyl (C)                      | 1684.7879 | 1684.7925 | 3     | 62.0 | P47757 | F-actin-capping protein subunit beta                                               |
| NLSGQPNFPcR +<br>Carbamidomethyl (C)                         | 1288.5983 | 1288.5989 | 2     | 60.0 | Q9ET30 | Transmembrane 9 superfamily member 3                                               |
| AAQTSVAYGcIK +<br>Carbamidomethyl (C)                        | 1267.6231 | 1267.624  | 2     | 58.0 | Q9D019 | Arginine--tRNA ligase, cytoplasmic                                                 |

|                                                           |           |           |       |      |               |                                                                                    |
|-----------------------------------------------------------|-----------|-----------|-------|------|---------------|------------------------------------------------------------------------------------|
| APDTcccSATALR + 3 Carbamidomethyl (C)                     | 1481.6061 | 1481.6196 | 2     | 58.0 | Q80ZD3        | Sodium-independent sulfate anion transporter                                       |
| cGVNFSSLR + Carbamidomethyl (C)                           | 1038.4917 | 1038.4978 | 2     | 56.0 | Q9ES07        | Solute carrier family 15 member 2                                                  |
| ASGFcAPR + Carbamidomethyl (C)                            | 864.3912  | 864.3906  | 2     | 56.0 | Q01341        | Adenylate cyclase type 6                                                           |
| LDSHScLEVTAATLRR + Carbamidomethyl (C)                    | 1827.9261 | 1827.9322 | 4     | 56.0 | Q8VCT3        | Aminopeptidase B                                                                   |
| TFQDcYSSK + Carbamidomethyl (C)                           | 1134.4652 | 1134.4686 | 2     | 56.0 | Q8BH95        | Enoyl-CoA hydratase, mitochondrial                                                 |
| ILPESSILFLcDLQEK + Carbamidomethyl (C)                    | 1903.9965 | 1904.0171 | 2     | 69.0 | P85094        | Isochorismatase domain-containing protein 2A                                       |
| TLLSNcK + Carbamidomethyl (C)                             | 834.4269  | 834.4263  | 2     | 55.0 | Q6PB66        | Leucine-rich PPR motif-containing protein, mitochondrial                           |
| AVSIPPGPDQPPHQcLR + Carbamidomethyl (C)                   | 1898.9421 | 1898.9494 | 3     | 36.0 | Q8CFZ5        | Solute carrier family 22 member 12                                                 |
| KLEPSGPISTINcPPcK + 2 Carbamidomethyl (C)                 | 2062.0227 | 2062.0328 | 3     | 51.0 | P01867        | Ig gamma-2B chain C region                                                         |
| ETDGSFSScLR + Carbamidomethyl (C)                         | 1257.5296 | 1257.519  | 2     | 50.0 | Q91WU2        | Solute carrier family 22 member 7                                                  |
| GVScQFGPDVTK + Carbamidomethyl (C)                        | 1293.6024 | 1293.6051 | 2     | 50.0 | Q60676        | Serine/threonine-protein phosphatase 5                                             |
| LALTTAEFLAYQcEK + Carbamidomethyl (C)                     | 1756.8705 | 1756.8745 | 3     | 49.0 | P62814        | V-type proton ATPase subunit B, brain isoform                                      |
| LLVSTRASA                                                 | 916.5342  | 916.4978  | 2     | 47.0 | Q0QWG9        | Delphinin                                                                          |
| NcSSFLIK + Carbamidomethyl (C)                            | 967.4797  | 967.4851  | 2     | 46.0 | P41105        | 60S ribosomal protein L28                                                          |
| KAVVvcPK + Carbamidomethyl (C)                            | 899.5263  | 899.5301  | 2     | 46.0 | Q8VEK3        | Heterogeneous nuclear ribonucleoprotein U                                          |
| IGNcPFSQR + Carbamidomethyl (C)                           | 1077.5026 | 1077.5069 | 2     | 46.0 | Q8BXX9,Q8BHB9 | Chloride intracellular channel protein 5, Chloride intracellular channel protein 6 |
| TYRWcVcGR + 2 Carbamidomethyl (C)                         | 1256.5543 | 1256.5569 | 3     | 34.0 | B1AR13        | CDGSH iron-sulfur domain-containing protein 3, mitochondrial                       |
| THLPVQLLPSSFWKNDcK + Carbamidomethyl (C)                  | 2169.1041 | 2169.1151 | 3     | 45.0 | Q3UZZ6        | Sulfotransferase 1 family member D1                                                |
| QWcNcAFLESSAK + 2 Carbamidomethyl (C)                     | 1667.7072 | 1667.7069 | 2     | 45.0 | P62835        | Ras-related protein Rap-1A                                                         |
| LVQAFQYTDEHGEVcPAGWK PGSDTIKPNVDDSK + Carbamidomethyl (C) | 3787.7788 | 3787.8101 | +3;+4 | 37.0 | Q61171        | Peroxisomal oxidoreductin-2                                                        |
| ScSHQTSAPSLK + Carbamidomethyl (C)                        | 1301.6034 | 1301.6077 | 2     | 43.0 | Q99K70        | Ras-related GTP-binding protein C                                                  |
| RGEFcIAK + Carbamidomethyl (C)                            | 979.4909  | 979.4933  | 2     | 42.0 | Q78PY7        | Staphylococcal nuclease domain-containing protein 1                                |

|                                                   |           |           |       |       |               |                                                                         |
|---------------------------------------------------|-----------|-----------|-------|-------|---------------|-------------------------------------------------------------------------|
| VTVFAEGcHGHLAK + Carbamidomethyl (C)              | 1524.7507 | 1524.7531 | 4     | 42.0  | Q921G7        | Electron transfer flavoprotein-ubiquinone oxidoreductase, mitochondrial |
| cIYFNTK + Carbamidomethyl (C)                     | 944.4426  | 944.4446  | 2     | 44.0  | P50285        | Dimethylaniline monooxygenase [N-oxide forming] 1                       |
| IIHEDGYSEDEcK + Carbamidomethyl (C)               | 1593.6617 | 1593.6655 | 3     | 41.0  | Q9DC51        | Guanine nucleotide-binding protein G(k) subunit alpha                   |
| GGYIGSTYFERcLK + Carbamidomethyl (C)              | 1649.7872 | 1649.793  | 3     | 41.0  | P61082        | NEDD8-conjugating enzyme Ubc12                                          |
| FcPFAQR + Carbamidomethyl (C)                     | 924.4276  | 924.4322  | 2     | 39.0  | O09131        | Glutathione S-transferase omega-1                                       |
| SIEEAAAscIK + Carbamidomethyl (C)                 | 1177.5648 | 1177.569  | 2     | 39.0  | Q9DBK0        | Acyl-coenzyme A thioesterase 12                                         |
| TAcAHWSDQccR + 3 Carbamidomethyl (C)              | 1686.6337 | 1686.6402 | 3     | 39.0  | Q91X17        | Uromodulin                                                              |
| QGQQLVTcSGAFK + Carbamidomethyl (C)               | 1479.714  | 1479.6946 | 2     | 36.0  | Q3U1J4        | DNA damage-binding protein 1                                            |
| SSNVLSEdQDSYLcNVTlFRK + Carbamidomethyl (C)       | 2474.1747 | 2474.1863 | 3     | 35.0  | Q9Z1G3        | V-type proton ATPase subunit C 1                                        |
| LSKPIEVQVGGR                                      | 1281.7405 | 1281.7653 | 2     | 35.0  | Q569Z5        | Probable ATP-dependent RNA helicase DDX46                               |
| FicGTQSIHK + Carbamidomethyl (C)                  | 1189.5914 | 1189.593  | 3     | 34.0  | O88986        | 2-amino-3-ketobutyrate coenzyme A ligase, mitochondrial                 |
| cAQGcVCKG + 2 Carbamidomethyl (C)                 | 1117.4355 | 1117.4366 | 2     | 34.0  | P02802        | Metallothionein-1                                                       |
| cGSGAVPWK + Carbamidomethyl (C)                   | 960.4487  | 960.469   | 2     | 33.0  | Q9D3R5        | Ig-like V-type domain-containing protein FAM187A                        |
| FIQQTYPSGGEEQAQYcR + Carbamidomethyl (C)          | 2160.9535 | 2160.9764 | 2     | 31.0  | Q9WU78        | Programmed cell death 6-interacting protein                             |
| cAQcHTVEK + 2 Carbamidomethyl (C)                 | 1199.5063 | 1199.5067 | 3     | 31.0  | P00015,P62897 | Cytochrome c, testis-specific,Cytochrome c, somatic                     |
| FLHDPSATQGFVGCA                                   | 1548.7031 | 1548.7094 | 2     | 74.0  | P17563,Q63836 | Selenium-binding protein 1,Selenium-binding protein 2                   |
| FLHDPSATQGFVGcALS + Carbamidomethyl (C)           | 1805.8407 | 1805.8519 | 2     | 106.0 | P17563,Q63836 | Selenium-binding protein 1,Selenium-binding protein 2                   |
| LPMPYLKDELHHSWNTCCSScFGDSTK + Carbamidomethyl (C) | 3177.3994 | 3177.4155 | 4     | 40.0  | P17563,Q63836 | Selenium-binding protein 1,Selenium-binding protein 2                   |
| RPCFSAL                                           | 792.3952  | 792.398   | 2     | 50.0  | P07724        | Serum albumin                                                           |
| CSYDEHAK                                          | 951.3756  | 951.3769  | +2;+3 | 45.0  | P07724        | Serum albumin                                                           |
| GLVLIAFSQYLQKCSYDEHAK                             | 2412.2147 | 2412.2285 | 4     | 83.0  | P07724        | Serum albumin                                                           |
| SVGcNVDGR + Carbamidomethyl (C)                   | 962.424   | 962.4219  | 2     | 65.0  | P35979        | 60S ribosomal protein L12                                               |

|                                                                                   |           |           |   |       |               |                                                                                                     |
|-----------------------------------------------------------------------------------|-----------|-----------|---|-------|---------------|-----------------------------------------------------------------------------------------------------|
| TAQSVGCVNDGR                                                                      | 1205.5459 | 1205.5444 | 2 | 100.0 | P35979        | 60S ribosomal protein L12                                                                           |
| QcPSSLAIQENANALAR + Carbamidomethyl (C)                                           | 1841.9053 | 1841.9163 | 2 | 100.0 | Q91Y97        | Fructose-bisphosphate aldolase B                                                                    |
| ALNTHLRDSDLWFPVDPGAD ASLCGMAATGASGTNAVR                                           | 3798.8206 | 3798.8499 | 4 | 34.0  | Q7TNG8        | Probable D-lactate dehydrogenase, mitochondrial                                                     |
| STATPDDPYEVKR                                                                     | 1477.7049 | 1477.7028 | 3 | 50.0  | Q91XE4        | N-acyl-aromatic-L-amino acid amidohydrolase (carboxylate-forming)                                   |
| RVPTPNVSVVLTCCR                                                                   | 1654.8825 | 1654.8903 | 3 | 69.0  | P16858,Q64467 | Glyceraldehyde-3-phosphate dehydrogenase, Glyceraldehyde-3-phosphate dehydrogenase, testis-specific |
| CQTTNICVPR                                                                        | 1133.5322 | 1133.5308 | 2 | 49.0  | A2ARV4        | Low-density lipoprotein receptor-related protein 2                                                  |
| EFQCGSGECILR                                                                      | 1340.5853 | 1340.5897 | 2 | 58.0  | A2ARV4        | Low-density lipoprotein receptor-related protein 2                                                  |
| ACSTGEFScANGR + Carbamidomethyl (C)                                               | 1358.5343 | 1358.5345 | 2 | 103.0 | A2ARV4        | Low-density lipoprotein receptor-related protein 2                                                  |
| cNQFQFTCLNGR + Carbamidomethyl (C)                                                | 1486.6446 | 1486.6507 | 2 | 62.0  | A2ARV4        | Low-density lipoprotein receptor-related protein 2                                                  |
| HQcLCEEGYILER + Carbamidomethyl (C)                                               | 1648.7337 | 1648.7395 | 2 | 75.0  | A2ARV4        | Low-density lipoprotein receptor-related protein 2                                                  |
| cACDPEYTLSDGRTCK + Carbamidomethyl (C)                                            | 1946.7808 | 1946.7887 | 2 | 65.0  | A2ARV4        | Low-density lipoprotein receptor-related protein 2                                                  |
| LLVVPNWLTQVRIFHQLR                                                                | 2231.3055 | 2231.3059 | 4 | 34.0  | A2ARV4        | Low-density lipoprotein receptor-related protein 2                                                  |
| QPSSNPCASATCSHLcLLSAQ EPR + Carbamidomethyl (C)                                   | 2653.2047 | 2653.2103 | 3 | 78.0  | A2ARV4        | Low-density lipoprotein receptor-related protein 2                                                  |
| AYDADLQTGTNYCSQTTHPN GDcSHFCFPVPNFQR + Carbamidomethyl (C)                        | 3990.6785 | 3990.7342 | 3 | 96.0  | A2ARV4        | Low-density lipoprotein receptor-related protein 2                                                  |
| DVGGIVLANAcGpCiGQWDRK + 2 Carbamidomethyl (C)                                     | 2353.1307 | 2353.1359 | 3 | 85.0  | Q99K10        | Aconitate hydratase, mitochondrial                                                                  |
| TDIANLAEFEKDHLPDPGcQY DQVIEINLNELKPHINGPFTPD L AHPVADVTVAEK + Carbamidomethyl (C) | 6403.1747 | 6403.2325 | 6 | 32.0  | Q99K10        | Aconitate hydratase, mitochondrial                                                                  |
| SPQCGEcR + Carbamidomethyl (C)                                                    | 1003.3851 | 1003.3839 | 2 | 35.0  | P00329        | Alcohol dehydrogenase 1                                                                             |
| NETLGGTCLNVGcIPSK + Carbamidomethyl (C)                                           | 1829.8652 | 1829.8798 | 2 | 106.0 | O08749        | Dihydrolipoyl dehydrogenase, mitochondrial                                                          |

|                                                                |           |           |       |       |                                            |                                                                                                                   |
|----------------------------------------------------------------|-----------|-----------|-------|-------|--------------------------------------------|-------------------------------------------------------------------------------------------------------------------|
| AHILGPGAGEMVNEAALALEY<br>GASCEDIAR                             | 3027.4429 | 3027.4594 | 3     | 132.0 | O08749                                     | Dihydrolipoyl dehydrogenase,<br>mitochondrial                                                                     |
| AHILGPGAGEMVNEAALALEY<br>GAScEDIAR +<br>Carbamidomethyl (C)    | 3084.4644 | 3084.4834 | 3     | 80.0  | O08749                                     | Dihydrolipoyl dehydrogenase,<br>mitochondrial                                                                     |
| ILEATAHAQAQLGcPVIIHPGR<br>+ Carbamidomethyl (C)                | 2351.2532 | 2351.2688 | +3;+4 | 87.0  | Q60866                                     | Phosphotriesterase-related protein                                                                                |
| NMMAACDPR                                                      | 1007.3987 | 1007.3998 | 2     | 39.0  | P99024,Q9D6F9,P<br>68372,Q9ERD7,Q<br>922F4 | Tubulin beta-5 chain,Tubulin beta-4A<br>chain,Tubulin beta-4B chain,Tubulin beta-<br>3 chain,Tubulin beta-6 chain |
| KEAESCDClQGFQLTHSLGGGT<br>GSGMGTLLISK +<br>Carbamidomethyl (C) | 3449.6265 | 3449.6354 | 4     | 65.0  | P99024,Q9D6F9,P<br>68372                   | Tubulin beta-5 chain,Tubulin beta-4A<br>chain,Tubulin beta-4B chain                                               |
| VIVVGNPANTNcLTASKSAPSIP<br>K + Carbamidomethyl (C)             | 2505.3261 | 2505.3435 | 3     | 70.0  | P14152                                     | Malate dehydrogenase, cytoplasmic                                                                                 |
| LAcVKK + Carbamidomethyl<br>(C)                                | 717.4207  | 717.4216  | 2     | 35.0  | Q92111                                     | Serotransferrin                                                                                                   |
| ScHTGLGR +<br>Carbamidomethyl (C)                              | 886.4079  | 886.4068  | 2     | 41.0  | Q92111                                     | Serotransferrin                                                                                                   |
| KSCHTGLGR                                                      | 957.4814  | 957.4796  | +2;+3 | 57.0  | Q92111                                     | Serotransferrin                                                                                                   |
| cFVKLPEGTTPEK +<br>Carbamidomethyl (C)                         | 1504.7596 | 1504.762  | 3     | 60.0  | Q92111                                     | Serotransferrin                                                                                                   |
| NQQEGVcPEGSIDNSPVKWCA<br>LSHLER + Carbamidomethyl<br>(C)       | 3052.4131 | 3052.4334 | 4     | 60.0  | Q92111                                     | Serotransferrin                                                                                                   |
| cTIIGGGDTATccAK + 3<br>Carbamidomethyl (C)                     | 1832.8107 | 1832.818  | 2     | 90.0  | P09411                                     | Phosphoglycerate kinase 1                                                                                         |
| GVPGAFTPgcSK +<br>Carbamidomethyl (C)                          | 1176.5598 | 1176.5687 | 2     | 60.0  | P99029                                     | Peroxisome oxidoreductase, mitochondrial                                                                          |
| EAAALGSHGScSSEVEK                                              | 1660.7362 | 1660.7442 | 2     | 135.0 | Q9CR51                                     | V-type proton ATPase subunit G 1                                                                                  |
| EAAALGSHGScSSEVEK +<br>Carbamidomethyl (C)                     | 1717.7577 | 1717.7637 | +2;+3 | 133.0 | Q9CR51                                     | V-type proton ATPase subunit G 1                                                                                  |
| GIDDCYTSAR                                                     | 1099.4604 | 1099.4624 | 2     | 37.0  | P25444                                     | 40S ribosomal protein S2                                                                                          |
| VECHPYLAQNELIAHcHAR +<br>Carbamidomethyl (C)                   | 2328.0892 | 2328.1016 | 5     | 65.0  | Q9JII6                                     | Alcohol dehydrogenase [NADP(+)]                                                                                   |
| IECDDKGDGScDVR +<br>Carbamidomethyl (C)                        | 1635.6505 | 1635.6867 | 3     | 34.0  | Q8BTM8,Q8VHX6                              | Filamin-A,Filamin-C                                                                                               |
| RCEAFGWHTIIVDGHsVEELcK<br>+ Carbamidomethyl (C)                | 2653.2417 | 2653.2473 | 3     | 46.0  | P40142                                     | Transketolase                                                                                                     |
| SMcPSIILDKDGQVR +<br>Carbamidomethyl (C)                       | 1717.8491 | 1717.8581 | +2;+3 | 109.0 | Q60928                                     | Gamma-glutamyltranspeptidase 1                                                                                    |
| CLATGPGIAPTvk                                                  | 1226.6693 | 1226.6715 | 2     | 92.0  | Q80X90                                     | Filamin-B                                                                                                         |
| SCTVLSLLGAR                                                    | 1118.6118 | 1118.6136 | 2     | 70.0  | P97328                                     | Ketohexokinase                                                                                                    |
| QGAALGIPYFTACR                                                 | 1466.734  | 1466.739  | 2     | 94.0  | P47199                                     | Quinone oxidoreductase                                                                                            |



|                                                                  |           |            |       |       |                                    |                                                                                                                        |
|------------------------------------------------------------------|-----------|------------|-------|-------|------------------------------------|------------------------------------------------------------------------------------------------------------------------|
| YMAcCLLYR + Carbamidomethyl (C)                                  | 1259.5501 | 1259.5531  | 2     | 54.0  | P68368,P05213,P68369,P68373,Q3UX10 | Tubulin alpha-4A chain,Tubulin alpha-1B chain,Tubulin alpha-1A chain,Tubulin alpha-1C chain,Tubulin alpha chain-like 3 |
| YAlcSALAASALPALVMSK + Carbamidomethyl (C)                        | 1936.0161 | 1936.0266  | +2;+3 | 113.0 | Q9D8E6                             | 60S ribosomal protein L4                                                                                               |
| MGSVMVIGGVIWSMCQCY+ CARBAMIDOMETHYL (C);CARBAMIDOMETHYL ©        | 1962.8534 | 1962.88576 | 3     | 180.0 | Q8VIM4                             | Barttin                                                                                                                |
| IGGVIWSMCQCYPKITFVP + CARBAMIDOMETHYL (C);CARBAMIDOMETHYL ©      | 2141.0512 | 2141.05264 | 3     | 70.0  | Q8VIM4                             | Barttin                                                                                                                |
| IGGVIWSMCQcYPKITF + CARBAMIDOMETHYL (C);CARBAMIDOMETHYL (C)      | 2069.9777 | 2069.99584 | 3     | 80.0  | Q8VIM4                             | Barttin                                                                                                                |
| MVIGGVIWSMcQcYPKITFVP A + CARBAMIDOMETHYL (C); CARBAMIDOMETHYL © | 2624.2664 | 2624.1709  | 4     | 50.0  | Q8VIM4                             | Barttin                                                                                                                |
| MVIGGVIWSMCQcYPKITFVP ADSDFQILSPKALSL + CARBAMIDOMETHYL ©        | 4139.0644 | 4139.00864 | 6     | 35.0  | Q8VIM4                             | Barttin                                                                                                                |
| METYCNSGSDTSSVINAVTH ALTAATPYTR                                  | 3261.4918 | 3261.5224  | 3     | 171.0 | Q80XN0                             | D-beta-hydroxybutyrate dehydrogenase, mitochondrial                                                                    |
| FLPCNSYIDSYDPSTGEVYck + Carbamidomethyl (C)                      | 2525.0767 | 2525.0886  | 2     | 65.0  | Q8BH00                             | Aldehyde dehydrogenase family 8 member A1                                                                              |
| KIHMGNCaENTAK + Carbamidomethyl (C)                              | 1472.6864 | 1472.6843  | 3     | 36.0  | Q8QZT1                             | Acetyl-CoA acetyltransferase, mitochondrial                                                                            |
| IIPGFMCQGGDFTR                                                   | 1540.7167 | 1540.7228  | 2     | 108.0 | P17742                             | Peptidyl-prolyl cis-trans isomerase A                                                                                  |
| CPFTGNVSIR                                                       | 1092.5386 | 1092.5411  | 2     | 58.0  | P62281                             | 40S ribosomal protein S11                                                                                              |
| HKNMSVHLSPcFR + Carbamidomethyl (C)                              | 1611.7762 | 1611.7833  | 4     | 47.0  | P62281                             | 40S ribosomal protein S11                                                                                              |
| VPKGEVLLVCK                                                      | 1240.7213 | 1240.7253  | 3     | 63.0  | O35488                             | Very long-chain acyl-CoA synthetase                                                                                    |
| CPDIAIQLAGTK                                                     | 1228.6485 | 1228.6527  | 2     | 81.0  | P51855                             | Glutathione synthetase                                                                                                 |
| APicNPVLCSWGK + Carbamidomethyl (C)                              | 1511.7265 | 1511.7287  | 2     | 85.0  | Q9R0P3                             | S-formylglutathione hydrolase                                                                                          |
| TVFAEHISDEcK + Carbamidomethyl (C)                               | 1434.6449 | 1434.6506  | 3     | 45.0  | P27659                             | 60S ribosomal protein L3                                                                                               |
| LLAcIASR + Carbamidomethyl (C)                                   | 902.5007  | 902.5023   | 2     | 47.0  | P62242                             | 40S ribosomal protein S8                                                                                               |
| LDVGNFWSGSEcCTR + Carbamidomethyl (C)                            | 1797.7451 | 1797.7563  | 2     | 82.0  | P62242                             | 40S ribosomal protein S8                                                                                               |

|                                                    |           |           |   |       |                                                   |                                                                                                                                                                                                                                                                                                         |
|----------------------------------------------------|-----------|-----------|---|-------|---------------------------------------------------|---------------------------------------------------------------------------------------------------------------------------------------------------------------------------------------------------------------------------------------------------------------------------------------------------------|
| KNCLVK                                             | 703.4051  | 703.4075  | 2 | 41.0  | Q8VDN2,Q6PIE5,<br>Q6PIC6,Q9WV27,<br>Q9Z1W8,Q99N95 | Sodium/potassium-transporting ATPase subunit alpha-1,Sodium/potassium-transporting ATPase subunit alpha-2,Sodium/potassium-transporting ATPase subunit alpha-3,Sodium/potassium-transporting ATPase subunit alpha-4,Potassium-transporting ATPase alpha chain 2,39S ribosomal protein L3, mitochondrial |
| KNcLVK + Carbamidomethyl (C)                       | 760.4265  | 760.4284  | 2 | 53.0  | Q8VDN2,Q6PIE5,<br>Q6PIC6,Q9WV27,<br>Q9Z1W8,Q99N95 | Sodium/potassium-transporting ATPase subunit alpha-1,Sodium/potassium-transporting ATPase subunit alpha-2,Sodium/potassium-transporting ATPase subunit alpha-3,Sodium/potassium-transporting ATPase subunit alpha-4,Potassium-transporting ATPase alpha chain 2,39S ribosomal protein L3, mitochondrial |
| DLAGCIHGLSNVK                                      | 1325.6762 | 1325.6792 | 2 | 87.0  | P54071                                            | Isocitrate dehydrogenase [NADP], mitochondrial                                                                                                                                                                                                                                                          |
| VcVQTVESGAMTK + Carbamidomethyl (C)                | 1408.6691 | 1408.6754 | 2 | 102.0 | P54071                                            | Isocitrate dehydrogenase [NADP], mitochondrial                                                                                                                                                                                                                                                          |
| QPEVFCNQIFINNEWHDAVSR                              | 2545.1808 | 2545.1977 | 3 | 83.0  | P47738                                            | Aldehyde dehydrogenase, mitochondrial                                                                                                                                                                                                                                                                   |
| MTEQPMMcAYcVTEPSAGSD VAAIK + 2 Carbamidomethyl (C) | 2814.2043 | 2814.2241 | 3 | 52.0  | P45952                                            | Medium-chain specific acyl-CoA dehydrogenase, mitochondrial                                                                                                                                                                                                                                             |
| GIICGLTQFTNK                                       | 1293.6751 | 1293.6779 | 2 | 33.0  | Q64516,Q9WU65                                     | Glycerol kinase,Glycerol kinase 2                                                                                                                                                                                                                                                                       |
| GQcDLELINVCNENSLFK + Carbamidomethyl (C)           | 2162.9976 | 2163.0014 | 2 | 33.0  | Q68FD5                                            | Clathrin heavy chain 1                                                                                                                                                                                                                                                                                  |
| TALPLEcPK + Carbamidomethyl (C)                    | 1027.5372 | 1027.5383 | 2 | 64.0  | Q91WR5                                            | Aldo-keto reductase family 1 member C21                                                                                                                                                                                                                                                                 |

|                                               |           |           |       |       |                      |                                                                      |
|-----------------------------------------------|-----------|-----------|-------|-------|----------------------|----------------------------------------------------------------------|
| YKPVcNQVEcHPYLcNQMK + Carbamidomethyl (C)     | 2318.0646 | 2318.0904 | 2     | 30.0  | Q91WR5               | Aldo-keto reductase family 1 member C21                              |
| ICDFSNASKPQTIQESTGGIVEV LHK                   | 2800.4065 | 2800.4141 | 4     | 41.0  | P51660               | Peroxisomal multifunctional enzyme type 2                            |
| EMGGHHIVALcVLK + Carbamidomethyl (C)          | 1562.8061 | 1562.8107 | 3     | 50.0  | P00493               | Hypoxanthine-guanine phosphoribosyltransferase                       |
| LVSSPCcIVTSTYGWTANMER + Carbamidomethyl (C)   | 2442.1018 | 2442.0852 | +2;+3 | 112.0 | P11499               | Heat shock protein HSP 90-beta                                       |
| TLKEEAQGASVVPQGPSQPLP STANVVVIGGSLGCQTLYLHLAK | 4401.3002 | 4401.3253 | 4     | 34.0  | Q99LB7               | Sarcosine dehydrogenase, mitochondrial                               |
| MSYTLQLHPMPCAWNQWK                            | 2233.0271 | 2233.0307 | +2;+3 | 87.0  | Q91XE0               | Glycine N-acyltransferase                                            |
| AGDVTIPLYIPQcGECK + Carbamidomethyl (C)       | 1930.9169 | 1930.9333 | 2     | 72.0  | P28474               | Alcohol dehydrogenase class-3                                        |
| KAQcPIVER + Carbamidomethyl (C)               | 1099.5808 | 1099.5795 | +2;+3 | 74.0  | P97461               | 40S ribosomal protein S5                                             |
| VCNLIDSGTKEGASILLDGR                          | 2060.0572 | 2060.0667 | 3     | 78.0  | Q9EQ20               | Methylmalonate-semialdehyde dehydrogenase [acylating], mitochondrial |
| CDVDIRK                                       | 847.4222  | 847.4261  | 2     | 37.0  | P60710,P63260,Q8BFZ3 | Actin, cytoplasmic 1,Actin, cytoplasmic 2,Beta-actin-like protein 2  |
| MEScGIHETTFNSIMK + Carbamidomethyl (C)        | 1951.8478 | 1951.8584 | 2     | 69.0  | P60710,P63260        | Actin, cytoplasmic 1,Actin, cytoplasmic 2                            |
| VicVGLNYADHcQEQNVR + 2 Carbamidomethyl (C)    | 2242.0259 | 2242.0327 | 3     | 48.0  | Q3TC72               | Fumarylacetoacetate hydrolase domain-containing protein 2A           |
| AVQAVLRNLcLLYSLYGISQK + Carbamidomethyl (C)   | 2408.325  | 2408.3513 | 3     | 70.0  | Q9R0H0               | Peroxisomal acyl-coenzyme A oxidase 1                                |
| IcTTLIGLEEHLNALDR + Carbamidomethyl (C)       | 1967.0146 | 1967.0228 | 3     | 88.0  | Q8VC30               | Triokinase/FMN cyclase                                               |
| APSCSPFGK                                     | 892.4113  | 892.4108  | 2     | 54.0  | P70290               | 55 kDa erythrocyte membrane protein                                  |
| SAPSEAPSCSPFGK                                | 1363.6078 | 1363.6134 | 2     | 70.0  | P70290               | 55 kDa erythrocyte membrane protein                                  |
| SMTCPSTGLEEDVLFHIGK                           | 2062.9704 | 2062.9749 | 3     | 98.0  | Q60597               | 2-oxoglutarate dehydrogenase, mitochondrial                          |
| SMTcPSTGLEEDVLFHIGK + Carbamidomethyl (C)     | 2119.9918 | 2120.0106 | +2;+3 | 91.0  | Q60597               | 2-oxoglutarate dehydrogenase, mitochondrial                          |
| GHIISDGGcTcPGDVAK + 2 Carbamidomethyl (C)     | 1810.7979 | 1810.7975 | 3     | 54.0  | Q9DCZ1               | GMP reductase 1                                                      |
| CSPGSAGPAGSESEPR                              | 1487.6311 | 1487.6363 | 2     | 114.0 | Q9D7J9               | Enoyl-CoA hydratase domain-containing protein 3, mitochondrial       |
| SGDAAIVDMVPGKPMCVESFS DYPPLGR                 | 2937.3711 | 2937.3924 | 3     | 142.0 | P10126               | Elongation factor 1-alpha 1                                          |

|                                                               |           |           |       |       |        |                                                                    |
|---------------------------------------------------------------|-----------|-----------|-------|-------|--------|--------------------------------------------------------------------|
| HACVPVDFEEVHVSSNADEED<br>IR                                   | 2596.15   | 2596.1738 | 3     | 81.0  | P70404 | Isocitrate dehydrogenase [NAD] subunit<br>gamma 1, mitochondrial   |
| HPLEPDSSASCFQQLR                                              | 1813.8417 | 1813.8605 | +2;+3 | 137.0 | Q8R3L5 | Solute carrier organic anion transporter<br>family member 3A1      |
| QCSSGLQAVANIAGGIR                                             | 1643.8413 | 1643.8502 | 2     | 101.0 | Q921H8 | 3-ketoacyl-CoA thiolase A, peroxisomal                             |
| LSGcEAMDSQALVR +<br>Carbamidomethyl (C)                       | 1535.7072 | 1535.7105 | 2     | 76.0  | Q91WG0 | Acylcarnitine hydrolase                                            |
| cMQLTDFILKFPHSAR +<br>Carbamidomethyl (C)                     | 1962.9808 | 1962.9829 | 4     | 67.0  | Q9CR57 | 60S ribosomal protein L14                                          |
| TPCYAQIR                                                      | 950.4644  | 950.4664  | 2     | 49.0  | Q6NSQ9 | Glucose-6-phosphatase 3                                            |
| AALcTELK +<br>Carbamidomethyl (C)                             | 904.4688  | 904.4704  | 2     | 51.0  | Q3UNZ8 | Quinone oxidoreductase-like protein 2                              |
| KYESAYGTQFTPcQLLDHANN<br>SSK + Carbamidomethyl (C)            | 2871.3497 | 2871.3556 | 4     | 64.0  | Q8BMS1 | Trifunctional enzyme subunit alpha,<br>mitochondrial               |
| THHQAVNFNIFEGMVCHGVP<br>LVTISR                                | 2905.448  | 2905.4587 | 4     | 73.0  | Q9EQF5 | Dihydropyrimidinase                                                |
| ECDVLPDDTVSTLYNR                                              | 1838.8356 | 1838.8402 | 2     | 107.0 | Q8R0Y6 | Cytosolic 10-formyltetrahydrofolate<br>dehydrogenase               |
| TLTQCSWLLDGFPFR                                               | 1635.8079 | 1635.8183 | 2     | 88.0  | Q9WTP7 | GTP:AMP phosphotransferase AK3,<br>mitochondrial                   |
| TLTQcSWLLDGFPFR +<br>Carbamidomethyl (C)                      | 1692.8294 | 1692.833  | 2     | 78.0  | Q9WTP7 | GTP:AMP phosphotransferase AK3,<br>mitochondrial                   |
| LKPPFPADVGVFGCPTTVANV<br>ETVAVSPTIcR +<br>Carbamidomethyl (C) | 3409.7415 | 3409.7923 | 3     | 73.0  | Q91YT0 | NADH dehydrogenase [ubiquinone]<br>flavoprotein 1, mitochondrial   |
| YAGLKPEELPTCESLKDITAR                                         | 2333.1936 | 2333.1973 | 4     | 43.0  | O70250 | Phosphoglycerate mutase 2                                          |
| IPIVLCGNK                                                     | 955.5525  | 955.5542  | 2     | 44.0  | P62827 | GTP-binding nuclear protein Ran                                    |
| NScPPTAELLGSPGR +<br>Carbamidomethyl (C)                      | 1554.746  | 1554.7547 | 2     | 110.0 | P46412 | Glutathione peroxidase 3                                           |
| EGIECEVINLR                                                   | 1273.6336 | 1273.6385 | 2     | 91.0  | Q9D051 | Pyruvate dehydrogenase E1 component<br>subunit beta, mitochondrial |
| CDILIPAASEK                                                   | 1158.5954 | 1158.5987 | 2     | 41.0  | P26443 | Glutamate dehydrogenase 1,<br>mitochondrial                        |
| CGPASVQAVK                                                    | 958.4906  | 958.4922  | 2     | 72.0  | Q8BH61 | Coagulation factor XIII A chain                                    |
| SSNVLSEDDQSYLCNVTLFR                                          | 2289.0583 | 2289.079  | 2     | 123.0 | Q9Z1G3 | V-type proton ATPase subunit C 1                                   |
| KLEEDQIIMEDQNCK                                               | 1834.8441 | 1834.8599 | 2     | 123.0 | Q8VDD5 | Myosin-9                                                           |
| YDGYTScPLVTGYNR +<br>Carbamidomethyl (C)                      | 1764.7777 | 1764.7885 | 2     | 123.0 | Q9R112 | Sulfide:quinone oxidoreductase,<br>mitochondrial                   |

|                                                |           |           |       |       |        |                                                                     |
|------------------------------------------------|-----------|-----------|-------|-------|--------|---------------------------------------------------------------------|
| EHcEQLEK + Carbamidomethyl (C)                 | 1071.4655 | 1071.4672 | +2;+3 | 44.0  | P99028 | Cytochrome b-c1 complex subunit 6, mitochondrial                    |
| MQHLNPDQPQLIPDQITTDVNP ECLVSPR                 | 3169.5536 | 3169.5763 | 3     | 90.0  | Q8CIB5 | Fermitin family homolog 2                                           |
| SCPTVQHVLVAHR                                  | 1445.7562 | 1445.7595 | 3     | 58.0  | Q99NB1 | Acetyl-coenzyme A synthetase 2-like, mitochondrial                  |
| ScPTVQHVLVAHR + Carbamidomethyl (C)            | 1502.7776 | 1502.7785 | 2     | 86.0  | Q99NB1 | Acetyl-coenzyme A synthetase 2-like, mitochondrial                  |
| HTSETADALcPR + Carbamidomethyl (C)             | 1356.6092 | 1356.6091 | 3     | 53.0  | Q8BIJ6 | Isoleucine--tRNA ligase, mitochondrial                              |
| cFLTGHGAEK + Carbamidomethyl (C)               | 1118.5179 | 1118.5178 | 3     | 41.0  | Q8COM9 | Isoaspartyl peptidase/L-asparaginase                                |
| VGDSPICGAGGYADNNLGAVS TTGHGESILK               | 2959.3982 | 2959.4108 | 3     | 102.0 | Q8COM9 | Isoaspartyl peptidase/L-asparaginase                                |
| HGICEDLQR                                      | 1069.4975 | 1069.4987 | 2     | 58.0  | Q9JLB4 | Cubilin                                                             |
| ASSTCQLTFENVKVPETNILGK                         | 2378.2151 | 2378.226  | 3     | 30.0  | Q9DBL1 | Short/branched chain specific acyl-CoA dehydrogenase, mitochondrial |
| GFGHIGIAVPDVYACKR                              | 1888.9618 | 1888.9639 | 4     | 57.0  | Q9CPU0 | Lactoylglutathione lyase                                            |
| QMEKDETVSDCSPHIANIGR                           | 2229.0154 | 2229.02   | 3     | 96.0  | P47757 | F-actin-capping protein subunit beta                                |
| AYFPCIGcVHAISTDSPLEPVL K + Carbamidomethyl (C) | 2699.2975 | 2699.2982 | 3     | 65.0  | O08677 | Kininogen-1                                                         |
| GLCGAIHSSVAK                                   | 1141.5914 | 1141.5925 | +2;+3 | 78.0  | Q91VR2 | ATP synthase subunit gamma, mitochondrial                           |
| GVcGACK + Carbamidomethyl (C)                  | 761.32    | 761.32    | 2     | 33.0  | Q8VI36 | Paxillin                                                            |
| GSLeSGCQKPITGR + Carbamidomethyl (C)           | 1530.7283 | 1530.7369 | 2     | 68.0  | Q8VI36 | Paxillin                                                            |
| QVCQLPGLFcYAQHIASIDGR + Carbamidomethyl (C)    | 2443.1777 | 2443.1887 | 3     | 59.0  | Q791V5 | Mitochondrial carrier homolog 2                                     |
| TYFQGSIPAR                                     | 1138.5771 | 1138.5789 | 2     | 53.0  | P52760 | Ribonuclease UK114                                                  |
| TKYQGICPPVAR                                   | 1331.702  | 1331.7036 | 2     | 66.0  | P09470 | Angiotensin-converting enzyme                                       |
| SPPVMVAGGRVFLPCIQQIQ R                         | 2394.3028 | 2394.3086 | 3     | 50.0  | O08917 | Flotillin-1                                                         |
| ADRLVQMSICSSLAR                                | 1648.8389 | 1648.8424 | 3     | 45.0  | Q9Z0S1 | 3'(2'),5'-bisphosphate nucleotidase 1                               |
| STDCCGDNDPIDVcEIGSK + 2 Carbamidomethyl (C)    | 2219.8657 | 2219.8808 | 2     | 75.0  | Q91VM9 | Inorganic pyrophosphatase 2, mitochondrial                          |
| LLSHCLL                                        | 797.4469  | 797.4492  | 2     | 39.0  | P01942 | Hemoglobin subunit alpha                                            |
| LLSHCLLV                                       | 997.563   | 997.5648  | 2     | 40.0  | P01942 | Hemoglobin subunit alpha                                            |
| EKPDDPLNYFIGGCAGGLTLGA R                       | 2363.158  | 2363.1648 | 3     | 91.0  | Q9D8B4 | NADH dehydrogenase [ubiquinone] 1 alpha subcomplex subunit 11       |

|                                                                      |           |           |       |       |        |                                                                                      |
|----------------------------------------------------------------------|-----------|-----------|-------|-------|--------|--------------------------------------------------------------------------------------|
| FVLPANAFASPLQNPNDHCFc<br>TEK + Carbamidomethyl (C)                   | 2719.2523 | 2719.2623 | 3     | 91.0  | Q08857 | Platelet glycoprotein 4                                                              |
| YSYVCPDLVK                                                           | 1185.574  | 1185.5794 | 2     | 55.0  | Q99JY9 | Actin-related protein 3                                                              |
| KDYEEIGPSICR                                                         | 1408.6656 | 1408.6719 | 2     | 68.0  | Q99JY9 | Actin-related protein 3                                                              |
| FcLEGMEESGSEGLDELIFAQK<br>+ Carbamidomethyl (C)                      | 2488.1138 | 2488.1197 | 3     | 82.0  | Q9D1A2 | Cytosolic non-specific dipeptidase                                                   |
| SQ LCSQSLEITR                                                        | 1363.6765 | 1363.6822 | 2     | 91.0  | Q9Z1Z0 | General vesicular transport factor p115                                              |
| EGGPNPENSSLANILELCR                                                  | 2126.0062 | 2126.0204 | 2     | 88.0  | Q8K0Z7 | Translational activator of cytochrome c<br>oxidase 1                                 |
| TGVGYPQLSAVMECADA AHG<br>LK                                          | 2217.0558 | 2217.0759 | 3     | 55.0  | Q99L27 | GMP reductase 2                                                                      |
| YDDMAACMK                                                            | 1046.3871 | 1046.3903 | 2     | 84.0  | P63101 | 14-3-3 protein zeta/delta                                                            |
| LPcIFcENNR + 2<br>Carbamidomethyl (C)                                | 1502.701  | 1502.695  | 2     | 61.0  | P35486 | Pyruvate dehydrogenase E1 component<br>subunit alpha, somatic form,<br>mitochondrial |
| LLCNFMR                                                              | 895.4408  | 895.4431  | 2     | 57.0  | Q9R1P4 | Proteasome subunit alpha type-1                                                      |
| EGENTQIAEPEAcDQMYESLA<br>R + Carbamidomethyl (C)                     | 2540.0795 | 2540.0907 | +2;+3 | 103.0 | Q9CQY6 | Ubiquinol-cytochrome-c reductase<br>complex assembly factor 2                        |
| YNFTGCPK                                                             | 1075.4797 | 1075.4815 | 2     | 78.0  | P80313 | T-complex protein 1 subunit eta                                                      |
| GTVCaANDFNPDADAK +<br>Carbamidomethyl (C)                            | 1664.7101 | 1664.7121 | 2     | 77.0  | P14824 | Annexin A6                                                                           |
| cGIFAYLNYHVPR +<br>Carbamidomethyl (C)                               | 1608.7871 | 1608.7909 | 3     | 76.0  | P47856 | Glutamine--fructose-6-phosphate<br>aminotransferase [isomerizing] 1                  |
| ScGSSTPDEFPTDIPGTK +<br>Carbamidomethyl (C)                          | 1894.8255 | 1894.8328 | 2     | 75.0  | Q9Z0N1 | Eukaryotic translation initiation factor 2<br>subunit 3, X-linked                    |
| GHIEDCGHWTQIEKPTEVNQI<br>LIK                                         | 2787.4014 | 2787.4077 | 4     | 39.0  | P34914 | Bifunctional epoxide hydrolase 2                                                     |
| FNAHGDANTIVCNTK                                                      | 1603.7413 | 1603.7416 | 3     | 67.0  | P16045 | Galectin-1                                                                           |
| FNAHGDANTIVcNTK +<br>Carbamidomethyl (C)                             | 1660.7628 | 1660.7713 | 3     | 41.0  | P16045 | Galectin-1                                                                           |
| ASILGFACK                                                            | 908.479   | 908.4815  | 2     | 65.0  | P16406 | Glutamyl aminopeptidase                                                              |
| SLQPVVScGWLPPPANGHK +<br>Carbamidomethyl (C)                         | 2043.036  | 2043.0422 | 3     | 38.0  | Q9DBX3 | Sushi domain-containing protein 2                                                    |
| YGSQQCcYTAAGTQLLTS DST<br>SGSTPDRGHDWGAPPYR +<br>Carbamidomethyl (C) | 4147.8025 | 4147.8529 | 4     | 66.0  | Q9DBX3 | Sushi domain-containing protein 2                                                    |
| LVTSPCcIVTSTYGTANMER<br>+ Carbamidomethyl (C)                        | 2456.1174 | 2456.1234 | 3     | 72.0  | P07901 | Heat shock protein HSP 90-alpha                                                      |

|                                                 |           |           |       |      |                      |                                                                                                                                   |
|-------------------------------------------------|-----------|-----------|-------|------|----------------------|-----------------------------------------------------------------------------------------------------------------------------------|
| cGSSLVDKPFPAK + Carbamidomethyl (C)             | 1378.6915 | 1378.6915 | 3     | 72.0 | O70433               | Four and a half LIM domains protein 2                                                                                             |
| VACQGEVVR                                       | 959.4859  | 959.4837  | 2     | 71.0 | Q8CGC7               | Bifunctional glutamate/proline--tRNA ligase                                                                                       |
| VDcAVLDcEDGVAENK + 2 Carbamidomethyl (C)        | 1860.787  | 1860.7936 | 2     | 70.0 | Q8R4N0               | Citrate lyase subunit beta-like protein, mitochondrial                                                                            |
| QWNNcAFLESAK + Carbamidomethyl (C)              | 1553.6933 | 1553.6971 | 2     | 70.0 | Q99JI6               | Ras-related protein Rap-1b                                                                                                        |
| KFLDGNELTLADCNLLPK                              | 2003.0397 | 2003.0516 | 3     | 67.0 | Q9Z1Q5               | Chloride intracellular channel protein 1                                                                                          |
| cGPMVLDALIK + Carbamidomethyl (C)               | 1215.6355 | 1215.6416 | 2     | 66.0 | Q9CQA3               | Succinate dehydrogenase [ubiquinone] iron-sulfur subunit, mitochondrial                                                           |
| YcPNSVLVIIDVKPK + Carbamidomethyl (C)           | 1743.9593 | 1743.9732 | 3     | 64.0 | P26516               | 26S proteasome non-ATPase regulatory subunit 7                                                                                    |
| VLDALFPCVQGGTTAIPGAFGc GK + Carbamidomethyl (C) | 2446.2025 | 2446.2129 | 3     | 43.0 | P50516               | V-type proton ATPase catalytic subunit A                                                                                          |
| PicTLK + Carbamidomethyl (C)                    | 730.4047  | 730.4069  | 2     | 41.0 | Q02053,P31254,Q924W7 | Ubiquitin-like modifier-activating enzyme 1,Ubiquitin-like modifier-activating enzyme 1 Y,Suppression of tumorigenicity 5 protein |
| SIPicTLK + Carbamidomethyl (C)                  | 930.5208  | 930.5255  | 2     | 54.0 | Q02053,P31254        | Ubiquitin-like modifier-activating enzyme 1,Ubiquitin-like modifier-activating enzyme 1 Y                                         |
| ATDCVGHVATLLR                                   | 1469.7297 | 1469.734  | 3     | 64.0 | P17710               | Hexokinase-1                                                                                                                      |
| LAENFCVcHLATGDMLR + Carbamidomethyl (C)         | 1948.8958 | 1948.8979 | 3     | 33.0 | Q9WTP6               | Adenylate kinase 2, mitochondrial                                                                                                 |
| LAENFcVcHLATGDMLR + 2 Carbamidomethyl (C)       | 2073.9434 | 2073.9483 | 3     | 34.0 | Q9WTP6               | Adenylate kinase 2, mitochondrial                                                                                                 |
| SGPYCESIR                                       | 1097.4811 | 1097.4824 | 2     | 61.0 | Q7TMR0               | Lysosomal Pro-X carboxypeptidase                                                                                                  |
| YSFDTFSHQRPCLLK                                 | 1840.893  | 1840.9032 | +3;+4 | 53.0 | P47740               | Fatty aldehyde dehydrogenase                                                                                                      |
| APICISPTAFHSIAWADGEK                            | 2113.0302 | 2113.0278 | 3     | 59.0 | Q9NYQ2               | Hydroxyacid oxidase 2                                                                                                             |
| LNPPDESGPGCMSCK                                 | 1533.6262 | 1533.6133 | 2     | 58.0 | Q61411               | GTPase HRas                                                                                                                       |
| TVAMHEVFLCR                                     | 1304.6369 | 1304.6453 | 3     | 59.0 | Q6P8X1               | Sorting nexin-6                                                                                                                   |
| ADSDPHGPHTCGHVLNVIIGS NSLALAEAQR                | 3178.5578 | 3178.5747 | 4     | 57.0 | Q8QZY2               | Glycerate kinase                                                                                                                  |
| HQPSWSLEVLLECKK                                 | 1795.9291 | 1795.9307 | 3     | 56.0 | P03958               | Adenosine deaminase                                                                                                               |
| LSAPGcWLACTSFSR + Carbamidomethyl (C)           | 1654.7596 | 1654.7711 | 2     | 54.0 | Q9R1Q7               | Proteolipid protein 2                                                                                                             |
| LDPPNRPETSLWFTNPCK                              | 2261.0939 | 2261.1063 | +2;+3 | 57.0 | Q69ZN7               | Myoferlin                                                                                                                         |
| RLDTSLGCPR                                      | 1116.571  | 1116.5703 | 2     | 54.0 | Q78J03               | Methionine-R-sulfoxide reductase B2, mitochondrial                                                                                |

|                                                   |           |           |   |      |        |                                                              |
|---------------------------------------------------|-----------|-----------|---|------|--------|--------------------------------------------------------------|
| VVAACAMPVMK                                       | 1118.565  | 1118.5717 | 2 | 53.0 | Q91VD9 | NADH-ubiquinone oxidoreductase 75 kDa subunit, mitochondrial |
| LcEMK + Carbamidomethyl (C)                       | 792.3874  | 792.3871  | 2 | 46.0 | Q9CQR4 | Acyl-coenzyme A thioesterase 13                              |
| SGGLHCSSNAIR                                      | 1200.5669 | 1200.5647 | 3 | 51.0 | Q3UMB9 | WASH complex subunit 7                                       |
| cQPSDIENPR + Carbamidomethyl (C)                  | 1214.535  | 1214.5377 | 2 | 51.0 | P09055 | Integrin beta-1                                              |
| NMACVQR                                           | 820.3684  | 820.368   | 2 | 50.0 | Q9WVA4 | Transgelin-2                                                 |
| IWGDCTVR                                          | 948.4487  | 948.452   | 2 | 49.0 | P26638 | Serine--tRNA ligase, cytoplasmic                             |
| NTLDCGLK                                          | 862.4218  | 862.4247  | 2 | 49.0 | Q8JZU2 | Tricarboxylate transport protein, mitochondrial              |
| RLECLK                                            | 760.4265  | 760.4175  | 2 | 49.0 | Q6A068 | Cell division cycle 5-like protein                           |
| LcAGEEK + Carbamidomethyl (C)                     | 805.364   | 805.366   | 2 | 51.0 | Q9QZW0 | Phospholipid-transporting ATPase 11C                         |
| LALDCSGQ                                          | 805.364   | 805.3462  | 2 | 48.0 | Q3U2P1 | Protein transport protein Sec24A                             |
| VKDCPPADLIK                                       | 1310.7268 | 1310.7306 | 3 | 48.0 | Q64471 | Glutathione S-transferase theta-1                            |
| VcEPCYEQLNK + Carbamidomethyl (C)                 | 1449.6268 | 1449.6262 | 2 | 48.0 | Q99LI8 | Hepatocyte growth factor-regulated tyrosine kinase substrate |
| MGVVECAK                                          | 835.3932  | 835.3923  | 2 | 47.0 | P50580 | Proliferation-associated protein 2G4                         |
| ESATVTCLVK                                        | 1049.5427 | 1049.5436 | 2 | 47.0 | P01872 | Ig mu chain C region                                         |
| AIVDALPPPcESACSLPTDVK WFHQK + Carbamidomethyl (C) | 3219.5369 | 3219.5623 | 4 | 46.0 | Q9D819 | Inorganic pyrophosphatase                                    |
| KPVVPGHVLVCLRPVER                                 | 1994.1612 | 1994.1678 | 4 | 37.0 | O89106 | Bis(5'-adenosyl)-triphosphatase                              |
| KVVGcSCVVVK + Carbamidomethyl (C)                 | 1244.6621 | 1244.6714 | 2 | 45.0 | P63323 | 40S ribosomal protein S12                                    |
| YQQGDFGYCPR                                       | 1332.5557 | 1332.5605 | 2 | 45.0 | P67871 | Casein kinase II subunit beta                                |
| cLAVGMSRDAVK + Carbamidomethyl (C)                | 1305.6533 | 1305.6792 | 2 | 46.0 | P51448 | Nuclear receptor ROR-alpha                                   |
| IICNLKDDER                                        | 1217.6074 | 1217.6113 | 3 | 44.0 | Q9JMH6 | Thioredoxin reductase 1, cytoplasmic                         |
| WcEYGLTFTEK + Carbamidomethyl (C)                 | 1432.6333 | 1432.632  | 2 | 44.0 | Q60930 | Voltage-dependent anion-selective channel protein 2          |
| cPFDPNFK + Carbamidomethyl (C)                    | 1023.4484 | 1023.453  | 2 | 44.0 | Q62179 | Semaphorin-4B                                                |
| cILQDGR + Carbamidomethyl (C)                     | 860.4174  | 860.4167  | 2 | 43.0 | P63163 | Small nuclear ribonucleoprotein-associated protein N         |
| GFCFLEYEDHK                                       | 1386.5914 | 1386.5936 | 3 | 41.0 | Q7TMK9 | Heterogeneous nuclear ribonucleoprotein Q                    |
| PLcTLK + Carbamidomethyl (C)                      | 730.4047  | 730.4069  | 2 | 41.0 | Q14AW5 | Putative methyltransferase NSUN7                             |
| ScHTGIGR + Carbamidomethyl (C)                    | 886.4079  | 886.4068  | 2 | 41.0 | P08071 | Lactotransferrin                                             |



|                                                       |           |           |   |      |               |                                                                                                         |
|-------------------------------------------------------|-----------|-----------|---|------|---------------|---------------------------------------------------------------------------------------------------------|
| FcGGLIK + Carbamidomethyl (C)                         | 793.4156  | 793.4188  | 2 | 40.0 | O88343        | Electrogenic sodium bicarbonate cotransporter 1                                                         |
| GADLSKPPCR                                            | 1042.5229 | 1042.5229 | 3 | 40.0 | Q9Z2A5        | Arginyl-tRNA--protein transferase 1                                                                     |
| QLDcLACLLK + Carbamidomethyl (C)                      | 1175.6042 | 1175.57   | 2 | 39.0 | Q6ZQ93        | Ubiquitin carboxyl-terminal hydrolase 34                                                                |
| LFQECcPHSTDR + Carbamidomethyl (C)                    | 1559.6497 | 1559.6601 | 3 | 39.0 | P61979        | Heterogeneous nuclear ribonucleoprotein K                                                               |
| RTTDFSDFLSIVGCTK                                      | 1788.8717 | 1788.8837 | 3 | 38.0 | Q9D1P4        | Cysteine and histidine-rich domain-containing protein 1                                                 |
| AIHMALDcCGIAGPLEQFISDTCPKK + Carbamidomethyl (C)      | 2817.3322 | 2817.3933 | 4 | 37.0 | P40240        | CD9 antigen                                                                                             |
| KLGESCIFAPANVTSEK                                     | 1792.9029 | 1792.9072 | 3 | 37.0 | O08756        | 3-hydroxyacyl-CoA dehydrogenase type-2                                                                  |
| FFVLCGLDLVHAMPGTPWR                                   | 2045.0016 | 2045.012  | 3 | 37.0 | Q8BFS6        | Serine/threonine-protein phosphatase CPPED1                                                             |
| TVHQNSIFHcPTQAQAAVAQC FER + Carbamidomethyl (C)       | 2742.2755 | 2742.2808 | 4 | 33.0 | Q8BTY1        | Kynurenine--oxoglutarate transaminase 1                                                                 |
| KEQETCLAP                                             | 1017.4801 | 1017.482  | 2 | 32.0 | Q07968        | Coagulation factor XIII B chain                                                                         |
| TLQNCETGK                                             | 992.4597  | 992.461   | 2 | 31.0 | Q922B1        | O-acetyl-ADP-ribose deacetylase MACROD1                                                                 |
| EHRPPCAQEAPR                                          | 1389.6571 | 1389.6549 | 3 | 30.0 | Q64337        | Sequestosome-1                                                                                          |
| LSYcGGGEALAIPEPAR + Carbamidomethyl (C)               | 1906.9247 | 1906.9394 | 2 | 30.0 | Q8VE95        | UPF0598 protein C8orf82 homolog                                                                         |
| cGESGHLAK + Carbamidomethyl (C)                       | 957.4338  | 957.4333  | 2 | 49.0 | P53996        | Cellular nucleic acid-binding protein                                                                   |
| VDLEISPDFLAVPVGGHENSHC IcGNER + 2 Carbamidomethyl (C) | 3188.4655 | 3188.4615 | 4 | 46.0 | Q61838        | Pregnancy zone protein                                                                                  |
| VPTPNVSVVDLTcRLEKPAK + Carbamidomethyl (C)            | 2222.2093 | 2222.2139 | 4 | 32.0 | P16858        | Glyceraldehyde-3-phosphate dehydrogenase                                                                |
| LLPNEDcAK + Carbamidomethyl (C)                       | 1058.5066 | 1058.5095 | 2 | 73.0 | P15947,P00756 | Kallikrein-1,Kallikrein 1-related peptidase b3                                                          |
| YcGTSLPHPIISFGNALTVR + Carbamidomethyl (C)            | 2202.1256 | 2202.1299 | 3 | 84.0 | Q9JLB4        | Cubilin                                                                                                 |
| SSPYPTDVAR                                            | 1091.5247 | 1091.5284 | 2 | 54.0 | Q60597        | 2-oxoglutarate dehydrogenase, mitochondrial                                                             |
| VGEATETALTcLVEK + Carbamidomethyl (C)                 | 1619.8076 | 1619.8174 | 2 | 97.0 | O55143,Q64518 | Sarcoplasmic/endoplasmic reticulum calcium ATPase 2,Sarcoplasmic/endoplasmic reticulum calcium ATPase 3 |

|                                                    |           |           |   |      |        |                                                                                                          |
|----------------------------------------------------|-----------|-----------|---|------|--------|----------------------------------------------------------------------------------------------------------|
| TLVYGGIFLYPANK                                     | 1554.8446 | 1554.8516 | 2 | 56.0 | Q9QXD6 | Fructose-1,6-bisphosphatase 1                                                                            |
| VLRcDVTK + Carbamidomethyl (C)                     | 989.5328  | 989.5348  | 2 | 52.0 | P40936 | Indolethylamine N-methyltransferase                                                                      |
| GPAVGIDLGTTSyScGVFQHGK + Carbamidomethyl (C)       | 2262.1104 | 2262.1148 | 3 | 37.0 | P63017 | Heat shock cognate 71 kDa protein                                                                        |
| LYQScADPTGcGTGSDAR + 2 Carbamidomethyl (C)         | 1982.8099 | 1982.8079 | 2 | 94.0 | Q9ET22 | Dipeptidyl peptidase 2                                                                                   |
| cLVLTGGGGYDKVK + Carbamidomethyl (C)               | 1555.8069 | 1555.8105 | 3 | 91.0 | Q62465 | Synaptic vesicle membrane protein VAT-1 homolog                                                          |
| SSLYSSDIGKLVGcAIHVNGDSEEVVR + Carbamidomethyl (C)  | 3100.5499 | 3100.5607 | 3 | 78.0 | A2ATU0 | Probable 2-oxoglutarate dehydrogenase E1 component DHKTD1, mitochondrial                                 |
| DEFTNTcPSDKEVEIAYSVDVAK + Carbamidomethyl (C)      | 2517.1217 | 2517.1373 | 3 | 81.0 | Q9QYB1 | Chloride intracellular channel protein 4                                                                 |
| DVPLGAPLcIIVEK + Carbamidomethyl (C)               | 1522.8429 | 1522.8482 | 2 | 80.0 | Q8BMF4 | Dihydrolipoyllysine-residue acetyltransferase component of pyruvate dehydrogenase complex, mitochondrial |
| APPSLTDcIGTVDSR + Carbamidomethyl (C)              | 1684.8091 | 1684.8188 | 2 | 79.0 | Q9D7S9 | Charged multivesicular body protein 5                                                                    |
| SSVncPFSSQDMK + Carbamidomethyl (C)                | 1485.6228 | 1485.622  | 2 | 33.0 | O70133 | ATP-dependent RNA helicase A                                                                             |
| AQFEGIVTDLIKR                                      | 1488.83   | 1488.8312 | 3 | 73.0 | P38647 | Stress-70 protein, mitochondrial                                                                         |
| cAQGcVcK + 3 Carbamidomethyl (C)                   | 1117.4355 | 1117.4361 | 2 | 40.0 | P02802 | Metallothionein-1                                                                                        |
| ScsccPVGcSK + 5 Carbamidomethyl (C)                | 1732.6024 | 1732.6115 | 2 | 62.0 | P02802 | Metallothionein-1                                                                                        |
| KTETVcTFQDGALVQHQQWDGK + Carbamidomethyl (C)       | 2575.2126 | 2575.23   | 3 | 60.0 | Q05816 | Fatty acid-binding protein, epidermal                                                                    |
| cQNALQQVVAR + Carbamidomethyl (C)                  | 1285.6561 | 1285.6663 | 2 | 66.0 | P47856 | Glutamine--fructose-6-phosphate aminotransferase [isomerizing] 1                                         |
| YGIPGSicDDYMTLfcPvcSVcQLKR + 4 Carbamidomethyl (C) | 3237.479  | 3237.4738 | 3 | 64.0 | Q9JI48 | Placenta-specific gene 8 protein                                                                         |
| VcEITHESPSVK + Carbamidomethyl (C)                 | 1384.6657 | 1384.6706 | 2 | 63.0 | Q8VE38 | Oxidoreductase NAD-binding domain-containing protein 1                                                   |
| LVEGcLVGGR + Carbamidomethyl (C)                   | 1058.5543 | 1058.5581 | 2 | 63.0 | Q91YT0 | NADH dehydrogenase [ubiquinone] flavoprotein 1, mitochondrial                                            |
| FQPHSGQEDLFScQR + 2 Carbamidomethyl (C)            | 2062.8626 | 2062.8787 | 3 | 58.0 | Q6PDC8 | Major facilitator superfamily domain-containing protein 4A                                               |

|                                                              |           |           |       |       |        |                                                                     |
|--------------------------------------------------------------|-----------|-----------|-------|-------|--------|---------------------------------------------------------------------|
| ccLTyCFNKPEDK + 3<br>Carbamidomethyl (C)                     | 1869.7736 | 1869.7785 | 3     | 54.0  | P62983 | Ubiquitin-40S ribosomal protein S27a                                |
| cTVFcQDSR + 2<br>Carbamidomethyl (C)                         | 1171.4751 | 1171.4794 | 2     | 52.0  | O88552 | Claudin-2                                                           |
| PALAcLR + Carbamidomethyl<br>(C)                             | 799.4374  | 799.4411  | 2     | 50.0  | Q3UHN9 | Bifunctional heparan sulfate N-<br>deacetylase/N-sulfotransferase 1 |
| GENQILScR +<br>Carbamidomethyl (C)                           | 1075.508  | 1075.5119 | 2     | 46.0  | Q8VHL0 | Urea transporter 1                                                  |
| ScTDVTEYAVQR +<br>Carbamidomethyl (C)                        | 1427.6351 | 1427.6432 | 2     | 46.0  | Q99KW3 | TRIO and F-actin-binding protein                                    |
| EVNVSPcPTDpQLHK + 2<br>Carbamidomethyl (C)                   | 1947.8819 | 1947.8962 | 3     | 46.0  | Q9Z0J0 | Epididymal secretory protein E1                                     |
| cScQDGF + 2<br>Carbamidomethyl (C)                           | 1096.4066 | 1096.4095 | 2     | 43.0  | Q91X17 | Uromodulin                                                          |
| ESPSKDSEPScWGK +<br>Carbamidomethyl (C)                      | 1592.6777 | 1592.6743 | 3     | 42.0  | Q68FH0 | Plakophilin-4                                                       |
| ccGLENGAADWGNNFVEAK +<br>2 Carbamidomethyl (C)               | 2110.8837 | 2110.8996 | 2     | 41.0  | Q8R3G9 | Tetraspanin-8                                                       |
| YLTVAAIFR                                                    | 1052.6019 | 1052.5992 | 2     | 39.0  | Q7TMM9 | Tubulin beta-2A chain                                               |
| SLScGIEYEATQcPNPSSYPNLL<br>TR + 2 Carbamidomethyl (C)        | 3037.4161 | 3037.435  | 3     | 36.0  | P70691 | UDP-glucuronosyltransferase 1-2                                     |
| clIFFK + Carbamidomethyl<br>(C)                              | 826.4411  | 826.4416  | 2     | 35.0  | P54797 | Transport and Golgi organization 2<br>homolog                       |
| SVEScHNvGLLAHDGQVNEGD<br>QPDLGK + Carbamidomethyl<br>(C)     | 2874.3203 | 2874.3526 | 3     | 35.0  | Q921H9 | Cytochrome c oxidase assembly factor 7                              |
| KLFLTMDNLK                                                   | 1221.6791 | 1221.7188 | 2     | 35.0  | A2RTF1 | Cation channel sperm-associated protein<br>subunit beta             |
| KPYMcSlcEVR + 2<br>Carbamidomethyl (C)                       | 1441.6516 | 1441.602  | 2     | 32.0  | Q8VCZ7 | Zinc finger and BTB domain-containing<br>protein 7C                 |
| LcDKTTPGTWTLdQcIQTGVD<br>NPGHPFIK + 2<br>Carbamidomethyl (C) | 3366.6013 | 3366.6023 | 4     | 30.0  | P30275 | Creatine kinase U-type, mitochondrial                               |
| SGELQGGPDDNLIEGGGTKFV<br>cKPGAR + Carbamidomethyl<br>(C)     | 2758.3345 | 2758.3314 | 3     | 30.0  | O35382 | Exocyst complex component 4                                         |
| DELHHSgWNTcSScFGDSTK +<br>Carbamidomethyl (C)                | 2266.9008 | 2334.9495 | +3;+4 | 62.0  | P17563 | Selenium-binding protein 1                                          |
| LTGAIvGHVGDGNFHCILLVDP<br>DDAEEQR                            | 3245.5888 | 3245.601  | 5     | 34.0  | Q7TNG8 | Probable D-lactate dehydrogenase,<br>mitochondrial                  |
| SLGGGFHcWTcDVR + 2<br>Carbamidomethyl (C)                    | 1718.7294 | 1718.7415 | 3     | 34.0  | Q9D964 | Glycine amidinotransferase,<br>mitochondrial                        |
| DCPVSSYNEWDPLEEVIVGR                                         | 2306.0525 | 2306.0832 | 2     | 80.0  | Q9D964 | Glycine amidinotransferase,<br>mitochondrial                        |
| AHIMPAEFSScPLNSDEAVNK<br>+ Carbamidomethyl (C)               | 2316.0514 | 2316.0657 | 3     | 116.0 | Q91V76 | Ester hydrolase C11orf54 homolog                                    |
| ALACDGR                                                      | 704.3275  | 704.3298  | 2     | 63.0  | A2ARV4 | Low-density lipoprotein receptor-related<br>protein 2               |

|                                                           |           |           |       |       |                             |                                                                                                    |
|-----------------------------------------------------------|-----------|-----------|-------|-------|-----------------------------|----------------------------------------------------------------------------------------------------|
| ALAcDGR + Carbamidomethyl (C)                             | 761.349   | 761.3519  | 2     | 61.0  | A2ARV4                      | Low-density lipoprotein receptor-related protein 2                                                 |
| QPIMSNPCATNNGGcSHLCLIK + Carbamidomethyl (C)              | 2357.0748 | 2357.0854 | 3     | 88.0  | A2ARV4                      | Low-density lipoprotein receptor-related protein 2                                                 |
| TPNVSVVDLTCR                                              | 1302.6602 | 1302.6645 | 2     | 33.0  | P16858,Q64467               | Glyceraldehyde-3-phosphate dehydrogenase,Glyceraldehyde-3-phosphate dehydrogenase, testis-specific |
| cPLRPW + Carbamidomethyl (C)                              | 924.464   | 924.4655  | 2     | 39.0  | Q91Y97,P05063               | Fructose-bisphosphate aldolase B,Fructose-bisphosphate aldolase C                                  |
| QLGcPVIIHPGR + Carbamidomethyl (C)                        | 1345.7289 | 1345.7395 | 2     | 30.0  | Q60866                      | Phosphotriesterase-related protein                                                                 |
| AGPNTNGSQFFICTAK                                          | 1654.7773 | 1654.7931 | 2     | 107.0 | P17742                      | Peptidyl-prolyl cis-trans isomerase A                                                              |
| DVGGIVLANAcGPcIGQWDR + 2 Carbamidomethyl (C)              | 2225.0358 | 2225.0374 | 2     | 92.0  | Q99K10                      | Aconitate hydratase, mitochondrial                                                                 |
| SAGWVVIPIGLLFCKLSEPR                                      | 2085.1445 | 2085.154  | 3     | 88.0  | Q92111                      | Serotransferrin                                                                                    |
| LGGTCVNVGcVPK + Carbamidomethyl (C)                       | 1370.6687 | 1370.6757 | 2     | 47.0  | P47791                      | Glutathione reductase, mitochondrial                                                               |
| FciWTESAFR + Carbamidomethyl (C)                          | 1315.6019 | 1315.6083 | 2     | 58.0  | Q9D8E6                      | 60S ribosomal protein L4                                                                           |
| QPEVFcNQIFINNEWHDAVSR + Carbamidomethyl (C)               | 2602.2023 | 2602.2229 | 3     | 67.0  | P47738                      | Aldehyde dehydrogenase, mitochondrial                                                              |
| KACQSIYPLHDVFVR                                           | 1774.9189 | 1774.9209 | 3     | 70.0  | P97351                      | 40S ribosomal protein S3a                                                                          |
| VLVcGAGPVGMMVTLVAKAM GAAQVVVTDLSASR + Carbamidomethyl (C) | 3407.8343 | 3407.8652 | 4     | 48.0  | Q64442                      | Sorbitol dehydrogenase                                                                             |
| cKDAGLTK + Carbamidomethyl (C)                            | 891.4484  | 891.449   | 2     | 61.0  | Q91WR5                      | Aldo-keto reductase family 1 member C21                                                            |
| MAGIDDCYTSAR                                              | 1301.538  | 1301.5454 | 2     | 96.0  | P25444                      | 40S ribosomal protein S2                                                                           |
| YMACcLLYR + Carbamidomethyl (C)                           | 1259.5501 | 1259.5555 | 2     | 58.0  | P68368,P68369,P68373,Q3UX10 | Tubulin alpha-4A chain,Tubulin alpha-1A chain,Tubulin alpha-1C chain,Tubulin alpha chain-like 3    |
| YIQAACK                                                   | 795.3949  | 795.3978  | 2     | 50.0  | Q68FD5                      | Clathrin heavy chain 1                                                                             |
| VIQCFaETGQVQK                                             | 1449.7286 | 1449.7384 | 2     | 90.0  | Q68FD5                      | Clathrin heavy chain 1                                                                             |
| VcASGMK + Carbamidomethyl (C)                             | 751.3357  | 751.3382  | 2     | 45.0  | Q8QZT1                      | Acetyl-CoA acetyltransferase, mitochondrial                                                        |
| AHVAPCFDASK                                               | 1144.5335 | 1144.5378 | +2;+3 | 48.0  | Q8BTM8                      | Filamin-A                                                                                          |
| TSGVQCYGPGIEGQGVFR                                        | 1853.8731 | 1853.895  | 2     | 111.0 | Q8BTM8                      | Filamin-A                                                                                          |
| QIDDVLSVASVRPAVLQVECH PYLAQNELIAHCHAR                     | 3994.0305 | 3994.0455 | 6     | 31.0  | Q9JII6                      | Alcohol dehydrogenase [NADP(+)]                                                                    |
| LYNTcSVFGPDGSLLVK + Carbamidomethyl (C)                   | 1868.9343 | 1868.9471 | 2     | 44.0  | Q9JHW2                      | Omega-amidase NIT2                                                                                 |

|                                                              |           |           |       |       |                                 |                                                                                              |
|--------------------------------------------------------------|-----------|-----------|-------|-------|---------------------------------|----------------------------------------------------------------------------------------------|
| GVDVSQVTWQSQGDTpSccl<br>VNNSNGSRT + 3<br>Carbamidomethyl (C) | 3312.4194 | 3312.4318 | 3     | 39.0  | P97328                          | Ketohexokinase                                                                               |
| SVSAFAPICNPVLcSWGK +<br>Carbamidomethyl (C)                  | 2002.9645 | 2002.986  | 2     | 36.0  | Q9R0P3                          | S-formylglutathione hydrolase                                                                |
| cLTVLSLQESGLK +<br>Carbamidomethyl (C)                       | 1446.7752 | 1446.7798 | 2     | 59.0  | Q80X90                          | Filamin-B                                                                                    |
| LPIGGLAEFCK                                                  | 1146.6107 | 1146.6159 | 2     | 60.0  | P05202                          | Aspartate aminotransferase,<br>mitochondrial                                                 |
| EYLPiGGLAEFCK                                                | 1438.7166 | 1438.7274 | 2     | 70.0  | P05202                          | Aspartate aminotransferase,<br>mitochondrial                                                 |
| AcALSIAESCRPGDKVPSIK +<br>Carbamidomethyl (C)                | 2169.0922 | 2169.1018 | +3;+4 | 50.0  | Q8K2B3                          | Succinate dehydrogenase [ubiquinone]<br>flavoprotein subunit, mitochondrial                  |
| VVQDLCK                                                      | 803.4211  | 803.4243  | 2     | 56.0  | Q99LC5                          | Electron transfer flavoprotein subunit<br>alpha, mitochondrial                               |
| FAELVYTGFWHSPECFVR                                           | 2316.0674 | 2316.0812 | 2     | 71.0  | P16460                          | Argininosuccinate synthase                                                                   |
| cQLMDSSEDLGMLSIQGPASR<br>+ Carbamidomethyl (C)               | 2294.0341 | 2294.0626 | 2     | 145.0 | Q99LB7                          | Sarcosine dehydrogenase, mitochondrial                                                       |
| GIFPVLCK                                                     | 875.4939  | 875.4974  | 2     | 47.0  | P52480                          | Pyruvate kinase PKM                                                                          |
| IISANGCKVDNSSLTGESEPQT<br>R                                  | 2405.1492 | 2405.161  | 3     | 72.0  | Q8VDN2                          | Sodium/potassium-transporting ATPase<br>subunit alpha-1                                      |
| FRCPEALFQPSFLGMEScGIHE<br>TTFNSIMK +<br>Carbamidomethyl (C)  | 3544.6288 | 3544.6669 | 3     | 74.0  | P60710,P63260                   | Actin, cytoplasmic 1,Actin, cytoplasmic 2                                                    |
| VCVQTVESGAMTK                                                | 1351.6476 | 1351.6524 | 2     | 112.0 | P54071                          | Isocitrate dehydrogenase [NADP],<br>mitochondrial                                            |
| GQcGNQIGAK +<br>Carbamidomethyl (C)                          | 1031.4818 | 1031.4824 | 2     | 61.0  | P99024,Q9D6F9,P<br>68372,A2AQ07 | Tubulin beta-5 chain,Tubulin beta-4A<br>chain,Tubulin beta-4B chain,Tubulin beta-<br>1 chain |
| GHIISDGGcTCPGDVAK +<br>Carbamidomethyl (C)                   | 1753.7764 | 1753.7755 | 3     | 43.0  | Q9DCZ1                          | GMP reductase 1                                                                              |
| INPVCADLVIDHSIQVDFNR                                         | 2364.1896 | 2364.2057 | 3     | 100.0 | P28271                          | Cytoplasmic aconitate hydratase                                                              |
| RILQLcMGNHELYMR +<br>Carbamidomethyl (C)                     | 1932.9484 | 1932.9626 | 3     | 45.0  | P26040                          | Ezrin                                                                                        |
| LDVGNFSWGSEccTR + 2<br>Carbamidomethyl (C)                   | 1854.7665 | 1854.7722 | 2     | 50.0  | P62242                          | 40S ribosomal protein S8                                                                     |
| NCIVLIDSTPYRQWYESHYALP<br>LGR                                | 2993.4858 | 2993.5146 | 3     | 57.0  | P62242                          | 40S ribosomal protein S8                                                                     |
| TcAEAVVPSYVPIVK +<br>Carbamidomethyl (C)                     | 1631.8593 | 1631.8713 | 2     | 50.0  | P36552                          | Oxygen-dependent coproporphyrinogen-<br>III oxidase, mitochondrial                           |
| LWCTFHDK                                                     | 1048.48   | 1048.4852 | 3     | 38.0  | P45376                          | Aldose reductase                                                                             |
| HIDcAQVYQNEKEVGVALQEK<br>+ Carbamidomethyl (C)               | 2457.1958 | 2457.227  | 3     | 67.0  | P45376                          | Aldose reductase                                                                             |

|                                |           |           |   |       |               |                                                                                                          |
|--------------------------------|-----------|-----------|---|-------|---------------|----------------------------------------------------------------------------------------------------------|
| STYGWTANMER                    | 1314.5663 | 1314.575  | 2 | 58.0  | P11499,P07901 | Heat shock protein HSP 90-beta,Heat shock protein HSP 90-alpha                                           |
| ASALAcLK + Carbamidomethyl (C) | 832.4476  | 832.4511  | 2 | 56.0  | Q8BMF4        | Dihydrolipoyllysine-residue acetyltransferase component of pyruvate dehydrogenase complex, mitochondrial |
| VLPMNTGVEAGETACK               | 1618.7695 | 1618.7784 | 2 | 129.0 | P29758        | Ornithine aminotransferase, mitochondrial                                                                |
| TDGCHAYLSK                     | 1093.4862 | 1093.491  | 3 | 46.0  | P40124        | Adenylyl cyclase-associated protein 1                                                                    |
| LRLLYECNPIAYVMEK               | 1954.0056 | 1954.016  | 3 | 60.0  | Q9QXD6        | Fructose-1,6-bisphosphatase 1                                                                            |
| GcVVGTKK + Carbamidomethyl (C) | 847.4586  | 847.4601  | 2 | 39.0  | P27659        | 60S ribosomal protein L3                                                                                 |
| KYQLNLPSPDTECVYR               | 2087.9986 | 2088.0076 | 3 | 51.0  | Q8K4Z3        | NAD(P)H-hydrate epimerase                                                                                |
